# Supplementary material for: Factors Influencing Porosity in Planktonic Foraminifera
Source: Copernicus journal article supplement (doi:10.5194/bg-2018-222), 2018-05-18
Supplement: Supplementary file 3 [file S3_Data_Tables1.xlsx]

## Sheet: ST1.Metadata
YPM Catalog Number	Locality	YPM Locality Code	Depth to (m)	Latitude	Longitude	Radius Numeric	Notes (for lat/long tab)	Datum	Water Depth (m)	Stratigraphy Details	Preparation Notes	Size Fraction (um)	Specimen ID	Species ID
IP.308224	AII-42-15-14	IPE.08212	0.02	19.567	-44.95	1000	determined by crew using onboard GPS	WGS84	3515	Calc Ooze	Imaged at 10x magnification, broken open, imaged again on SEM	300-425	A42_3-4_014	Globigerinoides ruber
IP.308225	AII-42-15-14	IPE.08212	0.02	19.567	-44.95	1000	determined by crew using onboard GPS	WGS84	3515	Calc Ooze	Imaged at 10x magnification, broken open, imaged again on SEM	300-425	A42_3-4_015	Globigerinoides ruber
IP.308226	AII-42-15-14	IPE.08212	0.02	19.567	-44.95	1000	determined by crew using onboard GPS	WGS84	3515	Calc Ooze	Imaged at 10x magnification, broken open, imaged again on SEM	300-425	A42_3-4_016	Globigerinoides sacculifer
IP.308227	AII-42-15-14	IPE.08212	0.02	19.567	-44.95	1000	determined by crew using onboard GPS	WGS84	3515	Calc Ooze	Imaged at 10x magnification, broken open, imaged again on SEM	300-425	A42_3-4_027	Globigerinoides sacculifer
IP.308228	AII-42-15-14	IPE.08212	0.02	19.567	-44.95	1000	determined by crew using onboard GPS	WGS84	3515	Calc Ooze	Imaged at 10x magnification, broken open, imaged again on SEM	300-425	A42_3-4_028	Globigerinoides sacculifer
IP.308229	AII-42-15-14	IPE.08212	0.02	19.567	-44.95	1000	determined by crew using onboard GPS	WGS84	3515	Calc Ooze	Imaged at 10x magnification, broken open, imaged again on SEM	300-425	A42_3-4_029	Globigerinoides sacculifer
IP.308230	AII-42-15-14	IPE.08212	0.02	19.567	-44.95	1000	determined by crew using onboard GPS	WGS84	3515	Calc Ooze	Imaged at 10x magnification, broken open, imaged again on SEM	300-425	A42_3-4_030	Globigerinoides sacculifer
IP.308231	AII-42-15-14	IPE.08212	0.02	19.567	-44.95	1000	determined by crew using onboard GPS	WGS84	3515	Calc Ooze	Imaged at 10x magnification, broken open, imaged again on SEM	300-425	A42_3-4_031	Globigerinoides sacculifer
IP.308232	AII-42-15-14	IPE.08212	0.02	19.567	-44.95	1000	determined by crew using onboard GPS	WGS84	3515	Calc Ooze	Imaged at 10x magnification, broken open, imaged again on SEM	300-425	A42_3-4_032	Globigerinella siphonifera
IP.308233	AII-42-15-14	IPE.08212	0.02	19.567	-44.95	1000	determined by crew using onboard GPS	WGS84	3515	Calc Ooze	Imaged at 10x magnification, broken open, imaged again on SEM	300-425	A42_3-4_034	Globigerinella siphonifera
IP.308234	AII-42-15-14	IPE.08212	0.02	19.567	-44.95	1000	determined by crew using onboard GPS	WGS84	3515	Calc Ooze	Imaged at 10x magnification, broken open, imaged again on SEM	300-425	A42_3-4_036	Globorotalia tumida
IP.308235	AII-42-15-14	IPE.08212	0.02	19.567	-44.95	1000	determined by crew using onboard GPS	WGS84	3515	Calc Ooze	Imaged at 10x magnification, broken open, imaged again on SEM	300-425	A42_3-4_037	Globorotalia tumida
IP.308236	AII-42-15-14	IPE.08212	0.02	19.567	-44.95	1000	determined by crew using onboard GPS	WGS84	3515	Calc Ooze	Imaged at 10x magnification, broken open, imaged again on SEM	300-425	A42_3-4_055	Globigerinella siphonifera
IP.308237	AII-42-15-14	IPE.08212	0.02	19.567	-44.95	1000	determined by crew using onboard GPS	WGS84	3515	Calc Ooze	Imaged at 10x magnification, broken open, imaged again on SEM	300-425	A42_3-4_006	Globigerinoides ruber
IP.308238	AII-42-15-14	IPE.08212	0.02	19.567	-44.95	1000	determined by crew using onboard GPS	WGS84	3515	Calc Ooze	Imaged at 10x magnification, broken open, imaged again on SEM	300-425	A42_3-4_062	Globorotalia truncatulinoides
IP.308239	AII-42-15-14	IPE.08212	0.02	19.567	-44.95	1000	determined by crew using onboard GPS	WGS84	3515	Calc Ooze	Imaged at 10x magnification, broken open, imaged again on SEM	300-425	A42_3-4_066	Globorotalia truncatulinoides
IP.308240	AII-42-15-14	IPE.08212	0.02	19.567	-44.95	1000	determined by crew using onboard GPS	WGS84	3515	Calc Ooze	Imaged at 10x magnification, broken open, imaged again on SEM	300-425	A42_3-4_068	Globorotalia truncatulinoides
IP.308241	AII-42-15-14	IPE.08212	0.02	19.567	-44.95	1000	determined by crew using onboard GPS	WGS84	3515	Calc Ooze	Imaged at 10x magnification, broken open, imaged again on SEM	300-425	A42_3-4_069	Globorotalia truncatulinoides
IP.308242	AII-42-15-14	IPE.08212	0.02	19.567	-44.95	1000	determined by crew using onboard GPS	WGS84	3515	Calc Ooze	Imaged at 10x magnification, broken open, imaged again on SEM	300-425	A42_3-4_070	Globorotalia truncatulinoides
IP.308243	AII-42-15-14	IPE.08212	0.02	19.567	-44.95	1000	determined by crew using onboard GPS	WGS84	3515	Calc Ooze	Imaged at 10x magnification, broken open, imaged again on SEM	300-425	A42_3-4_009	Globigerinoides ruber
IP.308244	AII-42-15-14	IPE.08212	0.02	19.567	-44.95	1000	determined by crew using onboard GPS	WGS84	3515	Calc Ooze	Imaged at 10x magnification, broken open, imaged again on SEM	425-600	A42_4-6_001	Globorotalia truncatulinoides
IP.308245	AII-42-15-14	IPE.08212	0.02	19.567	-44.95	1000	determined by crew using onboard GPS	WGS84	3515	Calc Ooze	Imaged at 10x magnification, broken open, imaged again on SEM	425-600	A42_4-6_011	Globorotalia truncatulinoides
IP.308246	AII-42-15-14	IPE.08212	0.02	19.567	-44.95	1000	determined by crew using onboard GPS	WGS84	3515	Calc Ooze	Imaged at 10x magnification, broken open, imaged again on SEM	425-600	A42_4-6_014	Globorotalia truncatulinoides
IP.308247	AII-42-15-14	IPE.08212	0.02	19.567	-44.95	1000	determined by crew using onboard GPS	WGS84	3515	Calc Ooze	Imaged at 10x magnification, broken open, imaged again on SEM	425-600	A42_4-6_015	Globorotalia truncatulinoides
IP.308248	AII-42-15-14	IPE.08212	0.02	19.567	-44.95	1000	determined by crew using onboard GPS	WGS84	3515	Calc Ooze	Imaged at 10x magnification, broken open, imaged again on SEM	425-600	A42_4-6_017	Orbulina universa
IP.308249	AII-42-15-14	IPE.08212	0.02	19.567	-44.95	1000	determined by crew using onboard GPS	WGS84	3515	Calc Ooze	Imaged at 10x magnification, broken open, imaged again on SEM	425-600	A42_4-6_018	Orbulina universa
IP.308250	AII-42-15-14	IPE.08212	0.02	19.567	-44.95	1000	determined by crew using onboard GPS	WGS84	3515	Calc Ooze	Imaged at 10x magnification, broken open, imaged again on SEM	425-600	A42_4-6_023	Orbulina universa
IP.308251	AII-42-15-14	IPE.08212	0.02	19.567	-44.95	1000	determined by crew using onboard GPS	WGS84	3515	Calc Ooze	Imaged at 10x magnification, broken open, imaged again on SEM	425-600	A42_4-6_024	Orbulina universa
IP.308252	AII-42-15-14	IPE.08212	0.02	19.567	-44.95	1000	determined by crew using onboard GPS	WGS84	3515	Calc Ooze	Imaged at 10x magnification, broken open, imaged again on SEM	425-600	A42_4-6_034	Globorotalia truncatulinoides
IP.308253	AII-42-15-14	IPE.08212	0.02	19.567	-44.95	1000	determined by crew using onboard GPS	WGS84	3515	Calc Ooze	Imaged at 10x magnification, broken open, imaged again on SEM	425-600	A42_4-6_035	Globigerinoides sacculifer
IP.308254	AII-42-15-14	IPE.08212	0.02	19.567	-44.95	1000	determined by crew using onboard GPS	WGS84	3515	Calc Ooze	Imaged at 10x magnification, broken open, imaged again on SEM	425-600	A42_4-6_036	Globigerinoides sacculifer
IP.308255	AII-42-15-14	IPE.08212	0.02	19.567	-44.95	1000	determined by crew using onboard GPS	WGS84	3515	Calc Ooze	Imaged at 10x magnification, broken open, imaged again on SEM	425-600	A42_4-6_037	Globigerinoides sacculifer
IP.308256	AII-42-15-14	IPE.08212	0.02	19.567	-44.95	1000	determined by crew using onboard GPS	WGS84	3515	Calc Ooze	Imaged at 10x magnification, broken open, imaged again on SEM	425-600	A42_4-6_038	Globigerinoides sacculifer
IP.308257	AII-42-15-14	IPE.08212	0.02	19.567	-44.95	1000	determined by crew using onboard GPS	WGS84	3515	Calc Ooze	Imaged at 10x magnification, broken open, imaged again on SEM	425-600	A42_4-6_004	Orbulina universa
IP.308258	AII-42-15-14	IPE.08212	0.02	19.567	-44.95	1000	determined by crew using onboard GPS	WGS84	3515	Calc Ooze	Imaged at 10x magnification, broken open, imaged again on SEM	425-600	A42_4-6_040	Globorotalia tumida
IP.308259	AII-42-15-14	IPE.08212	0.02	19.567	-44.95	1000	determined by crew using onboard GPS	WGS84	3515	Calc Ooze	Imaged at 10x magnification, broken open, imaged again on SEM	425-600	A42_4-6_045	Globigerinoides sacculifer
IP.308260	AII-42-15-14	IPE.08212	0.02	19.567	-44.95	1000	determined by crew using onboard GPS	WGS84	3515	Calc Ooze	Imaged at 10x magnification, broken open, imaged again on SEM	425-600	A42_4-6_046	Globorotalia truncatulinoides
IP.308261	AII-42-15-14	IPE.08212	0.02	19.567	-44.95	1000	determined by crew using onboard GPS	WGS84	3515	Calc Ooze	Imaged at 10x magnification, broken open, imaged again on SEM	425-600	A42_4-6_047	Globorotalia tumida
IP.308262	AII-42-15-14	IPE.08212	0.02	19.567	-44.95	1000	determined by crew using onboard GPS	WGS84	3515	Calc Ooze	Imaged at 10x magnification, broken open, imaged again on SEM	425-600	A42_4-6_048	Globigerinoides sacculifer
IP.308263	AII-42-15-14	IPE.08212	0.02	19.567	-44.95	1000	determined by crew using onboard GPS	WGS84	3515	Calc Ooze	Imaged at 10x magnification, broken open, imaged again on SEM	425-600	A42_4-6_049	Globorotalia tumida
IP.308264	AII-42-15-14	IPE.08212	0.02	19.567	-44.95	1000	determined by crew using onboard GPS	WGS84	3515	Calc Ooze	Imaged at 10x magnification, broken open, imaged again on SEM	425-600	A42_4-6_050	Globorotalia tumida
IP.308265	AII-42-15-14	IPE.08212	0.02	19.567	-44.95	1000	determined by crew using onboard GPS	WGS84	3515	Calc Ooze	Imaged at 10x magnification, broken open, imaged again on SEM	425-600	A42_4-6_052	Globorotalia tumida
IP.308266	AII-42-15-14	IPE.08212	0.02	19.567	-44.95	1000	determined by crew using onboard GPS	WGS84	3515	Calc Ooze	Imaged at 10x magnification, broken open, imaged again on SEM	425-600	A42_4-6_053	Globorotalia truncatulinoides
IP.308267	AII-42-15-14	IPE.08212	0.02	19.567	-44.95	1000	determined by crew using onboard GPS	WGS84	3515	Calc Ooze	Imaged at 10x magnification, broken open, imaged again on SEM	425-600	A42_4-6_054	Globorotalia tumida
IP.308268	AII-42-15-14	IPE.08212	0.02	19.567	-44.95	1000	determined by crew using onboard GPS	WGS84	3515	Calc Ooze	Imaged at 10x magnification, broken open, imaged again on SEM	425-600	A42_4-6_058	Globorotalia truncatulinoides
IP.308269	AII-42-15-14	IPE.08212	0.02	19.567	-44.95	1000	determined by crew using onboard GPS	WGS84	3515	Calc Ooze	Imaged at 10x magnification, broken open, imaged again on SEM	425-600	A42_4-6_007	Orbulina universa
IP.308270	AII-42-15-14	IPE.08212	0.02	19.567	-44.95	1000	determined by crew using onboard GPS	WGS84	3515	Calc Ooze	Imaged at 10x magnification, broken open, imaged again on SEM	425-600	A42_4-6_008	Orbulina universa
IP.308271	AII-42-15-14	IPE.08212	0.02	19.567	-44.95	1000	determined by crew using onboard GPS	WGS84	3515	Calc Ooze	Imaged at 10x magnification, broken open, imaged again on SEM	425-600	A42_4-6_009	Globorotalia tumida
IP.308272	AII-60-10	IPE.08199	0.03	-29.66	-34.667	1000	determined by crew using onboard GPS	WGS84	1840	Calc Ooze	Imaged at 10x magnification, broken open, imaged again on SEM	250-300	A6_2-3_011	Globigerinoides ruber
IP.308273	AII-60-10	IPE.08199	0.03	-29.66	-34.667	1000	determined by crew using onboard GPS	WGS84	1840	Calc Ooze	Imaged at 10x magnification, broken open, imaged again on SEM	250-300	A6_2-3_014	Globigerinoides ruber
IP.308274	AII-60-10	IPE.08199	0.03	-29.66	-34.667	1000	determined by crew using onboard GPS	WGS84	1840	Calc Ooze	Imaged at 10x magnification, broken open, imaged again on SEM	250-300	A6_2-3_015	Globorotalia inflata
IP.308275	AII-60-10	IPE.08199	0.03	-29.66	-34.667	1000	determined by crew using onboard GPS	WGS84	1840	Calc Ooze	Imaged at 10x magnification, broken open, imaged again on SEM	250-300	A6_2-3_016	Globorotalia inflata
IP.308276	AII-60-10	IPE.08199	0.03	-29.66	-34.667	1000	determined by crew using onboard GPS	WGS84	1840	Calc Ooze	Imaged at 10x magnification, broken open, imaged again on SEM	250-300	A6_2-3_017	Globorotalia inflata
IP.308277	AII-60-10	IPE.08199	0.03	-29.66	-34.667	1000	determined by crew using onboard GPS	WGS84	1840	Calc Ooze	Imaged at 10x magnification, broken open, imaged again on SEM	250-300	A6_2-3_018	Globorotalia inflata
IP.308278	AII-60-10	IPE.08199	0.03	-29.66	-34.667	1000	determined by crew using onboard GPS	WGS84	1840	Calc Ooze	Imaged at 10x magnification, broken open, imaged again on SEM	250-300	A6_2-3_019	Globigerinoides ruber
IP.308279	AII-60-10	IPE.08199	0.03	-29.66	-34.667	1000	determined by crew using onboard GPS	WGS84	1840	Calc Ooze	Imaged at 10x magnification, broken open, imaged again on SEM	250-300	A6_2-3_020	Globigerinoides ruber
IP.308280	AII-60-10	IPE.08199	0.03	-29.66	-34.667	1000	determined by crew using onboard GPS	WGS84	1840	Calc Ooze	Imaged at 10x magnification, broken open, imaged again on SEM	250-300	A6_2-3_022	Globigerinoides ruber
IP.308281	AII-60-10	IPE.08199	0.03	-29.66	-34.667	1000	determined by crew using onboard GPS	WGS84	1840	Calc Ooze	Imaged at 10x magnification, broken open, imaged again on SEM	250-300	A6_2-3_026	Globorotalia inflata
IP.308282	AII-60-10	IPE.08199	0.03	-29.66	-34.667	1000	determined by crew using onboard GPS	WGS84	1840	Calc Ooze	Imaged at 10x magnification, broken open, imaged again on SEM	250-300	A6_2-3_004	Globorotalia inflata
IP.308283	AII-60-10	IPE.08199	0.03	-29.66	-34.667	1000	determined by crew using onboard GPS	WGS84	1840	Calc Ooze	Imaged at 10x magnification, broken open, imaged again on SEM	250-300	A6_2-3_005	Globigerinoides ruber
IP.308284	AII-60-10	IPE.08199	0.03	-29.66	-34.667	1000	determined by crew using onboard GPS	WGS84	1840	Calc Ooze	Imaged at 10x magnification, broken open, imaged again on SEM	250-300	A6_2-3_006	Globorotalia inflata
IP.308285	AII-60-10	IPE.08199	0.03	-29.66	-34.667	1000	determined by crew using onboard GPS	WGS84	1840	Calc Ooze	Imaged at 10x magnification, broken open, imaged again on SEM	250-300	A6_2-3_008	Globorotalia inflata
IP.308286	AII-60-10	IPE.08199	0.03	-29.66	-34.667	1000	determined by crew using onboard GPS	WGS84	1840	Calc Ooze	Imaged at 10x magnification, broken open, imaged again on SEM	300-425	A6_3-4_010	Globigerinoides ruber
IP.308287	AII-60-10	IPE.08199	0.03	-29.66	-34.667	1000	determined by crew using onboard GPS	WGS84	1840	Calc Ooze	Imaged at 10x magnification, broken open, imaged again on SEM	300-425	A6_3-4_021	Globigerinoides ruber
IP.308288	AII-60-10	IPE.08199	0.03	-29.66	-34.667	1000	determined by crew using onboard GPS	WGS84	1840	Calc Ooze	Imaged at 10x magnification, broken open, imaged again on SEM	300-425	A6_3-4_022	Globigerinoides sacculifer
IP.308289	AII-60-10	IPE.08199	0.03	-29.66	-34.667	1000	determined by crew using onboard GPS	WGS84	1840	Calc Ooze	Imaged at 10x magnification, broken open, imaged again on SEM	300-425	A6_3-4_030	Globigerinoides sacculifer
IP.308290	AII-60-10	IPE.08199	0.03	-29.66	-34.667	1000	determined by crew using onboard GPS	WGS84	1840	Calc Ooze	Imaged at 10x magnification, broken open, imaged again on SEM	300-425	A6_3-4_004	Globigerinoides sacculifer
IP.308291	AII-60-10	IPE.08199	0.03	-29.66	-34.667	1000	determined by crew using onboard GPS	WGS84	1840	Calc Ooze	Imaged at 10x magnification, broken open, imaged again on SEM	300-425	A6_3-4_007	Globigerinoides sacculifer
IP.308292	AII-60-10	IPE.08199	0.03	-29.66	-34.667	1000	determined by crew using onboard GPS	WGS84	1840	Calc Ooze	Imaged at 10x magnification, broken open, imaged again on SEM	300-425	A6_3-4_008	Globigerinoides sacculifer
IP.308293	AII-60-10	IPE.08199	0.03	-29.66	-34.667	1000	determined by crew using onboard GPS	WGS84	1840	Calc Ooze	Imaged at 10x magnification, broken open, imaged again on SEM	425-600	A6_4-6_001	Globigerinoides conglobatus
IP.308294	AII-60-10	IPE.08199	0.03	-29.66	-34.667	1000	determined by crew using onboard GPS	WGS84	1840	Calc Ooze	Imaged at 10x magnification, broken open, imaged again on SEM	425-600	A6_4-6_011	Globigerinoides sacculifer
IP.308295	AII-60-10	IPE.08199	0.03	-29.66	-34.667	1000	determined by crew using onboard GPS	WGS84	1840	Calc Ooze	Imaged at 10x magnification, broken open, imaged again on SEM	425-600	A6_4-6_012	Globigerinoides sacculifer
IP.308296	AII-60-10	IPE.08199	0.03	-29.66	-34.667	1000	determined by crew using onboard GPS	WGS84	1840	Calc Ooze	Imaged at 10x magnification, broken open, imaged again on SEM	425-600	A6_4-6_017	Globigerinoides conglobatus
IP.308297	AII-60-10	IPE.08199	0.03	-29.66	-34.667	1000	determined by crew using onboard GPS	WGS84	1840	Calc Ooze	Imaged at 10x magnification, broken open, imaged again on SEM	425-600	A6_4-6_019	Globigerinoides sacculifer
IP.308298	AII-60-10	IPE.08199	0.03	-29.66	-34.667	1000	determined by crew using onboard GPS	WGS84	1840	Calc Ooze	Imaged at 10x magnification, broken open, imaged again on SEM	425-600	A6_4-6_024	Globigerinoides sacculifer
IP.308299	AII-60-10	IPE.08199	0.03	-29.66	-34.667	1000	determined by crew using onboard GPS	WGS84	1840	Calc Ooze	Imaged at 10x magnification, broken open, imaged again on SEM	425-600	A6_4-6_025	Globigerinoides sacculifer
IP.308300	AII-60-10	IPE.08199	0.03	-29.66	-34.667	1000	determined by crew using onboard GPS	WGS84	1840	Calc Ooze	Imaged at 10x magnification, broken open, imaged again on SEM	425-600	A6_4-6_026	Globigerinoides sacculifer
IP.308301	AII-60-10	IPE.08199	0.03	-29.66	-34.667	1000	determined by crew using onboard GPS	WGS84	1840	Calc Ooze	Imaged at 10x magnification, broken open, imaged again on SEM	425-600	A6_4-6_028	Orbulina universa
IP.308302	AII-60-10	IPE.08199	0.03	-29.66	-34.667	1000	determined by crew using onboard GPS	WGS84	1840	Calc Ooze	Imaged at 10x magnification, broken open, imaged again on SEM	425-600	A6_4-6_031	Orbulina universa
IP.308303	AII-60-10	IPE.08199	0.03	-29.66	-34.667	1000	determined by crew using onboard GPS	WGS84	1840	Calc Ooze	Imaged at 10x magnification, broken open, imaged again on SEM	425-600	A6_4-6_033	Orbulina universa
IP.308304	AII-60-10	IPE.08199	0.03	-29.66	-34.667	1000	determined by crew using onboard GPS	WGS84	1840	Calc Ooze	Imaged at 10x magnification, broken open, imaged again on SEM	425-600	A6_4-6_034	Orbulina universa
IP.308305	AII-60-10	IPE.08199	0.03	-29.66	-34.667	1000	determined by crew using onboard GPS	WGS84	1840	Calc Ooze	Imaged at 10x magnification, broken open, imaged again on SEM	425-600	A6_4-6_004	Globigerinoides conglobatus
IP.308306	AII-60-10	IPE.08199	0.03	-29.66	-34.667	1000	determined by crew using onboard GPS	WGS84	1840	Calc Ooze	Imaged at 10x magnification, broken open, imaged again on SEM	425-600	A6_4-6_006	Globigerinoides conglobatus
IP.308307	AII-60-10	IPE.08199	0.03	-29.66	-34.667	1000	determined by crew using onboard GPS	WGS84	1840	Calc Ooze	Imaged at 10x magnification, broken open, imaged again on SEM	425-600	A6_4-6_009	Globigerinoides conglobatus
IP.308308	CH82-21	IPE.08178	0.01	43.288	-29.83	1000	determined by crew using onboard GPS	WGS84	2103	Calc Ooze	Imaged at 10x magnification, broken open, imaged again on SEM	300-425	CH_3-4_001	Globigerina bulloides
IP.308309	CH82-21	IPE.08178	0.01	43.288	-29.83	1000	determined by crew using onboard GPS	WGS84	2103	Calc Ooze	Imaged at 10x magnification, broken open, imaged again on SEM	300-425	CH_3-4_001-2	Globorotalia truncatulinoides
IP.308310	CH82-21	IPE.08178	0.01	43.288	-29.83	1000	determined by crew using onboard GPS	WGS84	2103	Calc Ooze	Imaged at 10x magnification, broken open, imaged again on SEM	300-425	CH_3-4_010	Globorotalia inflata
IP.308311	CH82-21	IPE.08178	0.01	43.288	-29.83	1000	determined by crew using onboard GPS	WGS84	2103	Calc Ooze	Imaged at 10x magnification, broken open, imaged again on SEM	300-425	CH_3-4_010-2	Globorotalia hirsuta
IP.308312	CH82-21	IPE.08178	0.01	43.288	-29.83	1000	determined by crew using onboard GPS	WGS84	2103	Calc Ooze	Imaged at 10x magnification, broken open, imaged again on SEM	300-425	CH_3-4_011	Globigerina bulloides
IP.308313	CH82-21	IPE.08178	0.01	43.288	-29.83	1000	determined by crew using onboard GPS	WGS84	2103	Calc Ooze	Imaged at 10x magnification, broken open, imaged again on SEM	300-425	CH_3-4_012	Globigerinoides conglobatus
IP.308314	CH82-21	IPE.08178	0.01	43.288	-29.83	1000	determined by crew using onboard GPS	WGS84	2103	Calc Ooze	Imaged at 10x magnification, broken open, imaged again on SEM	300-425	CH_3-4_012-2	Globorotalia truncatulinoides
IP.308315	CH82-21	IPE.08178	0.01	43.288	-29.83	1000	determined by crew using onboard GPS	WGS84	2103	Calc Ooze	Imaged at 10x magnification, broken open, imaged again on SEM	300-425	CH_3-4_013	Globigerina bulloides
IP.308316	CH82-21	IPE.08178	0.01	43.288	-29.83	1000	determined by crew using onboard GPS	WGS84	2103	Calc Ooze	Imaged at 10x magnification, broken open, imaged again on SEM	300-425	CH_3-4_014	Globorotalia crassiformis
IP.308317	CH82-21	IPE.08178	0.01	43.288	-29.83	1000	determined by crew using onboard GPS	WGS84	2103	Calc Ooze	Imaged at 10x magnification, broken open, imaged again on SEM	300-425	CH_3-4_015	Unknown
IP.308318	CH82-21	IPE.08178	0.01	43.288	-29.83	1000	determined by crew using onboard GPS	WGS84	2103	Calc Ooze	Imaged at 10x magnification, broken open, imaged again on SEM	300-425	CH_3-4_015-2	Globorotalia hirsuta
IP.308319	CH82-21	IPE.08178	0.01	43.288	-29.83	1000	determined by crew using onboard GPS	WGS84	2103	Calc Ooze	Imaged at 10x magnification, broken open, imaged again on SEM	300-425	CH_3-4_016	Globigerina bulloides
IP.308320	CH82-21	IPE.08178	0.01	43.288	-29.83	1000	determined by crew using onboard GPS	WGS84	2103	Calc Ooze	Imaged at 10x magnification, broken open, imaged again on SEM	300-425	CH_3-4_017	Globigerina bulloides
IP.308321	CH82-21	IPE.08178	0.01	43.288	-29.83	1000	determined by crew using onboard GPS	WGS84	2103	Calc Ooze	Imaged at 10x magnification, broken open, imaged again on SEM	300-425	CH_3-4_017-2	Globorotalia hirsuta
IP.308322	CH82-21	IPE.08178	0.01	43.288	-29.83	1000	determined by crew using onboard GPS	WGS84	2103	Calc Ooze	Imaged at 10x magnification, broken open, imaged again on SEM	300-425	CH_3-4_018	Unknown
IP.308323	CH82-21	IPE.08178	0.01	43.288	-29.83	1000	determined by crew using onboard GPS	WGS84	2103	Calc Ooze	Imaged at 10x magnification, broken open, imaged again on SEM	300-425	CH_3-4_019	Globigerina bulloides
IP.308324	CH82-21	IPE.08178	0.01	43.288	-29.83	1000	determined by crew using onboard GPS	WGS84	2103	Calc Ooze	Imaged at 10x magnification, broken open, imaged again on SEM	300-425	CH_3-4_002	Globigerina bulloides
IP.308325	CH82-21	IPE.08178	0.01	43.288	-29.83	1000	determined by crew using onboard GPS	WGS84	2103	Calc Ooze	Imaged at 10x magnification, broken open, imaged again on SEM	300-425	CH_3-4_020	Globorotalia hirsuta
IP.308326	CH82-21	IPE.08178	0.01	43.288	-29.83	1000	determined by crew using onboard GPS	WGS84	2103	Calc Ooze	Imaged at 10x magnification, broken open, imaged again on SEM	300-425	CH_3-4_021	Globigerina bulloides
IP.308327	CH82-21	IPE.08178	0.01	43.288	-29.83	1000	determined by crew using onboard GPS	WGS84	2103	Calc Ooze	Imaged at 10x magnification, broken open, imaged again on SEM	300-425	CH_3-4_022	Globorotalia crassiformis
IP.308328	CH82-21	IPE.08178	0.01	43.288	-29.83	1000	determined by crew using onboard GPS	WGS84	2103	Calc Ooze	Imaged at 10x magnification, broken open, imaged again on SEM	300-425	CH_3-4_023	Globorotalia inflata
IP.308329	CH82-21	IPE.08178	0.01	43.288	-29.83	1000	determined by crew using onboard GPS	WGS84	2103	Calc Ooze	Imaged at 10x magnification, broken open, imaged again on SEM	300-425	CH_3-4_024	Globorotalia crassiformis
IP.308330	CH82-21	IPE.08178	0.01	43.288	-29.83	1000	determined by crew using onboard GPS	WGS84	2103	Calc Ooze	Imaged at 10x magnification, broken open, imaged again on SEM	300-425	CH_3-4_024-2	Globorotalia truncatulinoides
IP.308331	CH82-21	IPE.08178	0.01	43.288	-29.83	1000	determined by crew using onboard GPS	WGS84	2103	Calc Ooze	Imaged at 10x magnification, broken open, imaged again on SEM	300-425	CH_3-4_025	Globorotalia truncatulinoides
IP.308332	CH82-21	IPE.08178	0.01	43.288	-29.83	1000	determined by crew using onboard GPS	WGS84	2103	Calc Ooze	Imaged at 10x magnification, broken open, imaged again on SEM	300-425	CH_3-4_026	Neogloboquadrina dutertrei
IP.308333	CH82-21	IPE.08178	0.01	43.288	-29.83	1000	determined by crew using onboard GPS	WGS84	2103	Calc Ooze	Imaged at 10x magnification, broken open, imaged again on SEM	300-425	CH_3-4_026-2	Globorotalia truncatulinoides
IP.308334	CH82-21	IPE.08178	0.01	43.288	-29.83	1000	determined by crew using onboard GPS	WGS84	2103	Calc Ooze	Imaged at 10x magnification, broken open, imaged again on SEM	300-425	CH_3-4_027	Globigerina bulloides
IP.308335	CH82-21	IPE.08178	0.01	43.288	-29.83	1000	determined by crew using onboard GPS	WGS84	2103	Calc Ooze	Imaged at 10x magnification, broken open, imaged again on SEM	300-425	CH_3-4_028	Globigerina bulloides
IP.308336	CH82-21	IPE.08178	0.01	43.288	-29.83	1000	determined by crew using onboard GPS	WGS84	2103	Calc Ooze	Imaged at 10x magnification, broken open, imaged again on SEM	300-425	CH_3-4_029	Globorotalia inflata
IP.308337	CH82-21	IPE.08178	0.01	43.288	-29.83	1000	determined by crew using onboard GPS	WGS84	2103	Calc Ooze	Imaged at 10x magnification, broken open, imaged again on SEM	300-425	CH_3-4_003	Globigerina bulloides
IP.308338	CH82-21	IPE.08178	0.01	43.288	-29.83	1000	determined by crew using onboard GPS	WGS84	2103	Calc Ooze	Imaged at 10x magnification, broken open, imaged again on SEM	300-425	CH_3-4_003-2	Globorotalia truncatulinoides
IP.308339	CH82-21	IPE.08178	0.01	43.288	-29.83	1000	determined by crew using onboard GPS	WGS84	2103	Calc Ooze	Imaged at 10x magnification, broken open, imaged again on SEM	300-425	CH_3-4_030	Globigerina bulloides
IP.308340	CH82-21	IPE.08178	0.01	43.288	-29.83	1000	determined by crew using onboard GPS	WGS84	2103	Calc Ooze	Imaged at 10x magnification, broken open, imaged again on SEM	300-425	CH_3-4_031	Globigerinoides conglobatus
IP.308341	CH82-21	IPE.08178	0.01	43.288	-29.83	1000	determined by crew using onboard GPS	WGS84	2103	Calc Ooze	Imaged at 10x magnification, broken open, imaged again on SEM	300-425	CH_3-4_032	Neogloboquadrina pachyderma
IP.308342	CH82-21	IPE.08178	0.01	43.288	-29.83	1000	determined by crew using onboard GPS	WGS84	2103	Calc Ooze	Imaged at 10x magnification, broken open, imaged again on SEM	300-425	CH_3-4_033	Globigerina bulloides
IP.308343	CH82-21	IPE.08178	0.01	43.288	-29.83	1000	determined by crew using onboard GPS	WGS84	2103	Calc Ooze	Imaged at 10x magnification, broken open, imaged again on SEM	300-425	CH_3-4_034	Unknown
IP.308344	CH82-21	IPE.08178	0.01	43.288	-29.83	1000	determined by crew using onboard GPS	WGS84	2103	Calc Ooze	Imaged at 10x magnification, broken open, imaged again on SEM	300-425	CH_3-4_035	Globorotalia crassiformis
IP.308345	CH82-21	IPE.08178	0.01	43.288	-29.83	1000	determined by crew using onboard GPS	WGS84	2103	Calc Ooze	Imaged at 10x magnification, broken open, imaged again on SEM	300-425	CH_3-4_036	Neogloboquadrina dutertrei
IP.308346	CH82-21	IPE.08178	0.01	43.288	-29.83	1000	determined by crew using onboard GPS	WGS84	2103	Calc Ooze	Imaged at 10x magnification, broken open, imaged again on SEM	300-425	CH_3-4_037	Globorotalia inflata
IP.308347	CH82-21	IPE.08178	0.01	43.288	-29.83	1000	determined by crew using onboard GPS	WGS84	2103	Calc Ooze	Imaged at 10x magnification, broken open, imaged again on SEM	300-425	CH_3-4_038	Globorotalia inflata
IP.308348	CH82-21	IPE.08178	0.01	43.288	-29.83	1000	determined by crew using onboard GPS	WGS84	2103	Calc Ooze	Imaged at 10x magnification, broken open, imaged again on SEM	300-425	CH_3-4_039	Globigerina bulloides
IP.308349	CH82-21	IPE.08178	0.01	43.288	-29.83	1000	determined by crew using onboard GPS	WGS84	2103	Calc Ooze	Imaged at 10x magnification, broken open, imaged again on SEM	300-425	CH_3-4_004	Globorotalia inflata
IP.308350	CH82-21	IPE.08178	0.01	43.288	-29.83	1000	determined by crew using onboard GPS	WGS84	2103	Calc Ooze	Imaged at 10x magnification, broken open, imaged again on SEM	300-425	CH_3-4_04-2	Globorotalia truncatulinoides
IP.308351	CH82-21	IPE.08178	0.01	43.288	-29.83	1000	determined by crew using onboard GPS	WGS84	2103	Calc Ooze	Imaged at 10x magnification, broken open, imaged again on SEM	300-425	CH_3-4_040	Unknown
IP.308352	CH82-21	IPE.08178	0.01	43.288	-29.83	1000	determined by crew using onboard GPS	WGS84	2103	Calc Ooze	Imaged at 10x magnification, broken open, imaged again on SEM	300-425	CH_3-4_041	Unknown
IP.308353	CH82-21	IPE.08178	0.01	43.288	-29.83	1000	determined by crew using onboard GPS	WGS84	2103	Calc Ooze	Imaged at 10x magnification, broken open, imaged again on SEM	300-425	CH_3-4_042	Globigerinoides ruber
IP.308354	CH82-21	IPE.08178	0.01	43.288	-29.83	1000	determined by crew using onboard GPS	WGS84	2103	Calc Ooze	Imaged at 10x magnification, broken open, imaged again on SEM	300-425	CH_3-4_043	Globigerina bulloides
IP.308355	CH82-21	IPE.08178	0.01	43.288	-29.83	1000	determined by crew using onboard GPS	WGS84	2103	Calc Ooze	Imaged at 10x magnification, broken open, imaged again on SEM	300-425	CH_3-4_044	Globigerina bulloides
IP.308356	CH82-21	IPE.08178	0.01	43.288	-29.83	1000	determined by crew using onboard GPS	WGS84	2103	Calc Ooze	Imaged at 10x magnification, broken open, imaged again on SEM	300-425	CH_3-4_045	Globorotalia crassiformis
IP.308357	CH82-21	IPE.08178	0.01	43.288	-29.83	1000	determined by crew using onboard GPS	WGS84	2103	Calc Ooze	Imaged at 10x magnification, broken open, imaged again on SEM	300-425	CH_3-4_046	Globorotalia hirsuta
IP.308358	CH82-21	IPE.08178	0.01	43.288	-29.83	1000	determined by crew using onboard GPS	WGS84	2103	Calc Ooze	Imaged at 10x magnification, broken open, imaged again on SEM	300-425	CH_3-4_047	Globigerina bulloides
IP.308359	CH82-21	IPE.08178	0.01	43.288	-29.83	1000	determined by crew using onboard GPS	WGS84	2103	Calc Ooze	Imaged at 10x magnification, broken open, imaged again on SEM	300-425	CH_3-4_048	Globorotalia crassiformis
IP.308360	CH82-21	IPE.08178	0.01	43.288	-29.83	1000	determined by crew using onboard GPS	WGS84	2103	Calc Ooze	Imaged at 10x magnification, broken open, imaged again on SEM	300-425	CH_3-4_049	Globorotalia crassiformis
IP.308361	CH82-21	IPE.08178	0.01	43.288	-29.83	1000	determined by crew using onboard GPS	WGS84	2103	Calc Ooze	Imaged at 10x magnification, broken open, imaged again on SEM	300-425	CH_3-4_005	Neogloboquadrina dutertrei
IP.308362	CH82-21	IPE.08178	0.01	43.288	-29.83	1000	determined by crew using onboard GPS	WGS84	2103	Calc Ooze	Imaged at 10x magnification, broken open, imaged again on SEM	300-425	CH_3-4_050	Globorotalia inflata
IP.308363	CH82-21	IPE.08178	0.01	43.288	-29.83	1000	determined by crew using onboard GPS	WGS84	2103	Calc Ooze	Imaged at 10x magnification, broken open, imaged again on SEM	300-425	CH_3-4_051	Globorotalia crassiformis
IP.308364	CH82-21	IPE.08178	0.01	43.288	-29.83	1000	determined by crew using onboard GPS	WGS84	2103	Calc Ooze	Imaged at 10x magnification, broken open, imaged again on SEM	300-425	CH_3-4_052	Globorotalia inflata
IP.308365	CH82-21	IPE.08178	0.01	43.288	-29.83	1000	determined by crew using onboard GPS	WGS84	2103	Calc Ooze	Imaged at 10x magnification, broken open, imaged again on SEM	300-425	CH_3-4_053	Unknown
IP.308366	CH82-21	IPE.08178	0.01	43.288	-29.83	1000	determined by crew using onboard GPS	WGS84	2103	Calc Ooze	Imaged at 10x magnification, broken open, imaged again on SEM	300-425	CH_3-4_054	Globigerina bulloides
IP.308367	CH82-21	IPE.08178	0.01	43.288	-29.83	1000	determined by crew using onboard GPS	WGS84	2103	Calc Ooze	Imaged at 10x magnification, broken open, imaged again on SEM	300-425	CH_3-4_055	Globorotalia inflata
IP.308368	CH82-21	IPE.08178	0.01	43.288	-29.83	1000	determined by crew using onboard GPS	WGS84	2103	Calc Ooze	Imaged at 10x magnification, broken open, imaged again on SEM	300-425	CH_3-4_056	Globigerina bulloides
IP.308369	CH82-21	IPE.08178	0.01	43.288	-29.83	1000	determined by crew using onboard GPS	WGS84	2103	Calc Ooze	Imaged at 10x magnification, broken open, imaged again on SEM	300-425	CH_3-4_057	Globigerina bulloides
IP.308370	CH82-21	IPE.08178	0.01	43.288	-29.83	1000	determined by crew using onboard GPS	WGS84	2103	Calc Ooze	Imaged at 10x magnification, broken open, imaged again on SEM	300-425	CH_3-4_058	Globigerina bulloides
IP.308371	CH82-21	IPE.08178	0.01	43.288	-29.83	1000	determined by crew using onboard GPS	WGS84	2103	Calc Ooze	Imaged at 10x magnification, broken open, imaged again on SEM	300-425	CH_3-4_059	Globigerina bulloides
IP.308372	CH82-21	IPE.08178	0.01	43.288	-29.83	1000	determined by crew using onboard GPS	WGS84	2103	Calc Ooze	Imaged at 10x magnification, broken open, imaged again on SEM	300-425	CH_3-4_006	Globorotalia crassiformis
IP.308373	CH82-21	IPE.08178	0.01	43.288	-29.83	1000	determined by crew using onboard GPS	WGS84	2103	Calc Ooze	Imaged at 10x magnification, broken open, imaged again on SEM	300-425	CH_3-4_060	Globorotalia inflata
IP.308374	CH82-21	IPE.08178	0.01	43.288	-29.83	1000	determined by crew using onboard GPS	WGS84	2103	Calc Ooze	Imaged at 10x magnification, broken open, imaged again on SEM	300-425	CH_3-4_061	Globigerinoides conglobatus
IP.308375	CH82-21	IPE.08178	0.01	43.288	-29.83	1000	determined by crew using onboard GPS	WGS84	2103	Calc Ooze	Imaged at 10x magnification, broken open, imaged again on SEM	300-425	CH_3-4_062	Globorotalia truncatulinoides
IP.308376	CH82-21	IPE.08178	0.01	43.288	-29.83	1000	determined by crew using onboard GPS	WGS84	2103	Calc Ooze	Imaged at 10x magnification, broken open, imaged again on SEM	300-425	CH_3-4_063	Globorotalia inflata
IP.308377	CH82-21	IPE.08178	0.01	43.288	-29.83	1000	determined by crew using onboard GPS	WGS84	2103	Calc Ooze	Imaged at 10x magnification, broken open, imaged again on SEM	300-425	CH_3-4_064	Globigerina bulloides
IP.308378	CH82-21	IPE.08178	0.01	43.288	-29.83	1000	determined by crew using onboard GPS	WGS84	2103	Calc Ooze	Imaged at 10x magnification, broken open, imaged again on SEM	300-425	CH_3-4_065	Globigerinoides conglobatus
IP.308379	CH82-21	IPE.08178	0.01	43.288	-29.83	1000	determined by crew using onboard GPS	WGS84	2103	Calc Ooze	Imaged at 10x magnification, broken open, imaged again on SEM	300-425	CH_3-4_066	Globorotalia crassiformis
IP.308380	CH82-21	IPE.08178	0.01	43.288	-29.83	1000	determined by crew using onboard GPS	WGS84	2103	Calc Ooze	Imaged at 10x magnification, broken open, imaged again on SEM	300-425	CH_3-4_067	Globigerina bulloides
IP.308381	CH82-21	IPE.08178	0.01	43.288	-29.83	1000	determined by crew using onboard GPS	WGS84	2103	Calc Ooze	Imaged at 10x magnification, broken open, imaged again on SEM	300-425	CH_3-4_068	Globorotalia inflata
IP.308382	CH82-21	IPE.08178	0.01	43.288	-29.83	1000	determined by crew using onboard GPS	WGS84	2103	Calc Ooze	Imaged at 10x magnification, broken open, imaged again on SEM	300-425	CH_3-4_069	Globorotalia truncatulinoides
IP.308383	CH82-21	IPE.08178	0.01	43.288	-29.83	1000	determined by crew using onboard GPS	WGS84	2103	Calc Ooze	Imaged at 10x magnification, broken open, imaged again on SEM	300-425	CH_3-4_007	Globigerinoides ruber
IP.308384	CH82-21	IPE.08178	0.01	43.288	-29.83	1000	determined by crew using onboard GPS	WGS84	2103	Calc Ooze	Imaged at 10x magnification, broken open, imaged again on SEM	300-425	CH_3-4_070	Globigerina bulloides
IP.308385	CH82-21	IPE.08178	0.01	43.288	-29.83	1000	determined by crew using onboard GPS	WGS84	2103	Calc Ooze	Imaged at 10x magnification, broken open, imaged again on SEM	300-425	CH_3-4_071	Globorotalia truncatulinoides
IP.308386	CH82-21	IPE.08178	0.01	43.288	-29.83	1000	determined by crew using onboard GPS	WGS84	2103	Calc Ooze	Imaged at 10x magnification, broken open, imaged again on SEM	300-425	CH_3-4_072	Globorotalia inflata
IP.308387	CH82-21	IPE.08178	0.01	43.288	-29.83	1000	determined by crew using onboard GPS	WGS84	2103	Calc Ooze	Imaged at 10x magnification, broken open, imaged again on SEM	300-425	CH_3-4_073	Globigerina bulloides
IP.308388	CH82-21	IPE.08178	0.01	43.288	-29.83	1000	determined by crew using onboard GPS	WGS84	2103	Calc Ooze	Imaged at 10x magnification, broken open, imaged again on SEM	300-425	CH_3-4_074	Globigerina bulloides
IP.308389	CH82-21	IPE.08178	0.01	43.288	-29.83	1000	determined by crew using onboard GPS	WGS84	2103	Calc Ooze	Imaged at 10x magnification, broken open, imaged again on SEM	300-425	CH_3-4_075	Globigerina bulloides
IP.308390	CH82-21	IPE.08178	0.01	43.288	-29.83	1000	determined by crew using onboard GPS	WGS84	2103	Calc Ooze	Imaged at 10x magnification, broken open, imaged again on SEM	300-425	CH_3-4_076	Globigerina bulloides
IP.308391	CH82-21	IPE.08178	0.01	43.288	-29.83	1000	determined by crew using onboard GPS	WGS84	2103	Calc Ooze	Imaged at 10x magnification, broken open, imaged again on SEM	300-425	CH_3-4_077	Globorotalia inflata
IP.308392	CH82-21	IPE.08178	0.01	43.288	-29.83	1000	determined by crew using onboard GPS	WGS84	2103	Calc Ooze	Imaged at 10x magnification, broken open, imaged again on SEM	300-425	CH_3-4_008	Neogloboquadrina dutertrei
IP.308393	CH82-21	IPE.08178	0.01	43.288	-29.83	1000	determined by crew using onboard GPS	WGS84	2103	Calc Ooze	Imaged at 10x magnification, broken open, imaged again on SEM	300-425	CH_3-4_009	Neogloboquadrina dutertrei
IP.308394	CH82-21	IPE.08178	0.01	43.288	-29.83	1000	determined by crew using onboard GPS	WGS84	2103	Calc Ooze	Imaged at 10x magnification, broken open, imaged again on SEM	425-600	CH_4_6_001	Globorotalia hirsuta
IP.308395	CH82-21	IPE.08178	0.01	43.288	-29.83	1000	determined by crew using onboard GPS	WGS84	2103	Calc Ooze	Imaged at 10x magnification, broken open, imaged again on SEM	425-600	CH_4-6_010	Globorotalia inflata
IP.308396	CH82-21	IPE.08178	0.01	43.288	-29.83	1000	determined by crew using onboard GPS	WGS84	2103	Calc Ooze	Imaged at 10x magnification, broken open, imaged again on SEM	425-600	CH_4-6_011	Globorotalia hirsuta
IP.308397	CH82-21	IPE.08178	0.01	43.288	-29.83	1000	determined by crew using onboard GPS	WGS84	2103	Calc Ooze	Imaged at 10x magnification, broken open, imaged again on SEM	425-600	CH_4-6_012	Globorotalia hirsuta
IP.308398	CH82-21	IPE.08178	0.01	43.288	-29.83	1000	determined by crew using onboard GPS	WGS84	2103	Calc Ooze	Imaged at 10x magnification, broken open, imaged again on SEM	425-600	CH_4-6_013	Globorotalia truncatulinoides
IP.308399	CH82-21	IPE.08178	0.01	43.288	-29.83	1000	determined by crew using onboard GPS	WGS84	2103	Calc Ooze	Imaged at 10x magnification, broken open, imaged again on SEM	425-600	CH_4-6_014	Globorotalia truncatulinoides
IP.308400	CH82-21	IPE.08178	0.01	43.288	-29.83	1000	determined by crew using onboard GPS	WGS84	2103	Calc Ooze	Imaged at 10x magnification, broken open, imaged again on SEM	425-600	CH_4-6_015	Globorotalia hirsuta
IP.308401	CH82-21	IPE.08178	0.01	43.288	-29.83	1000	determined by crew using onboard GPS	WGS84	2103	Calc Ooze	Imaged at 10x magnification, broken open, imaged again on SEM	425-600	CH_4-6_016	Globorotalia hirsuta
IP.308402	CH82-21	IPE.08178	0.01	43.288	-29.83	1000	determined by crew using onboard GPS	WGS84	2103	Calc Ooze	Imaged at 10x magnification, broken open, imaged again on SEM	425-600	CH_4-6_017	Globorotalia inflata
IP.308403	CH82-21	IPE.08178	0.01	43.288	-29.83	1000	determined by crew using onboard GPS	WGS84	2103	Calc Ooze	Imaged at 10x magnification, broken open, imaged again on SEM	425-600	CH_4-6_018	Globorotalia hirsuta
IP.308404	CH82-21	IPE.08178	0.01	43.288	-29.83	1000	determined by crew using onboard GPS	WGS84	2103	Calc Ooze	Imaged at 10x magnification, broken open, imaged again on SEM	425-600	CH_4-6_019	Globorotalia hirsuta
IP.308405	CH82-21	IPE.08178	0.01	43.288	-29.83	1000	determined by crew using onboard GPS	WGS84	2103	Calc Ooze	Imaged at 10x magnification, broken open, imaged again on SEM	425-600	CH_4-6_002	Globorotalia truncatulinoides
IP.308406	CH82-21	IPE.08178	0.01	43.288	-29.83	1000	determined by crew using onboard GPS	WGS84	2103	Calc Ooze	Imaged at 10x magnification, broken open, imaged again on SEM	425-600	CH_4-6_020	Globorotalia truncatulinoides
IP.308407	CH82-21	IPE.08178	0.01	43.288	-29.83	1000	determined by crew using onboard GPS	WGS84	2103	Calc Ooze	Imaged at 10x magnification, broken open, imaged again on SEM	425-600	CH_4-6_021	Globorotalia inflata
IP.308408	CH82-21	IPE.08178	0.01	43.288	-29.83	1000	determined by crew using onboard GPS	WGS84	2103	Calc Ooze	Imaged at 10x magnification, broken open, imaged again on SEM	425-600	CH_4-6_022	Globorotalia truncatulinoides
IP.308409	CH82-21	IPE.08178	0.01	43.288	-29.83	1000	determined by crew using onboard GPS	WGS84	2103	Calc Ooze	Imaged at 10x magnification, broken open, imaged again on SEM	425-600	CH_4-6_023	Globorotalia inflata
IP.308410	CH82-21	IPE.08178	0.01	43.288	-29.83	1000	determined by crew using onboard GPS	WGS84	2103	Calc Ooze	Imaged at 10x magnification, broken open, imaged again on SEM	425-600	CH_4-6_024	Globorotalia truncatulinoides
IP.308411	CH82-21	IPE.08178	0.01	43.288	-29.83	1000	determined by crew using onboard GPS	WGS84	2103	Calc Ooze	Imaged at 10x magnification, broken open, imaged again on SEM	425-600	CH_4-6_025	Globorotalia crassiformis
IP.308412	CH82-21	IPE.08178	0.01	43.288	-29.83	1000	determined by crew using onboard GPS	WGS84	2103	Calc Ooze	Imaged at 10x magnification, broken open, imaged again on SEM	425-600	CH_4-6_026	Globorotalia crassiformis
IP.308413	CH82-21	IPE.08178	0.01	43.288	-29.83	1000	determined by crew using onboard GPS	WGS84	2103	Calc Ooze	Imaged at 10x magnification, broken open, imaged again on SEM	425-600	CH_4-6_027	Globorotalia hirsuta
IP.308414	CH82-21	IPE.08178	0.01	43.288	-29.83	1000	determined by crew using onboard GPS	WGS84	2103	Calc Ooze	Imaged at 10x magnification, broken open, imaged again on SEM	425-600	CH_4-6_028	Globorotalia truncatulinoides
IP.308415	CH82-21	IPE.08178	0.01	43.288	-29.83	1000	determined by crew using onboard GPS	WGS84	2103	Calc Ooze	Imaged at 10x magnification, broken open, imaged again on SEM	425-600	CH_4-6_029	Globorotalia crassiformis
IP.308416	CH82-21	IPE.08178	0.01	43.288	-29.83	1000	determined by crew using onboard GPS	WGS84	2103	Calc Ooze	Imaged at 10x magnification, broken open, imaged again on SEM	425-600	CH_4-6_003	Globorotalia inflata
IP.308417	CH82-21	IPE.08178	0.01	43.288	-29.83	1000	determined by crew using onboard GPS	WGS84	2103	Calc Ooze	Imaged at 10x magnification, broken open, imaged again on SEM	425-600	CH_4-6_030	Globorotalia truncatulinoides
IP.308418	CH82-21	IPE.08178	0.01	43.288	-29.83	1000	determined by crew using onboard GPS	WGS84	2103	Calc Ooze	Imaged at 10x magnification, broken open, imaged again on SEM	425-600	CH_4-6_031	Orbulina universa
IP.308419	CH82-21	IPE.08178	0.01	43.288	-29.83	1000	determined by crew using onboard GPS	WGS84	2103	Calc Ooze	Imaged at 10x magnification, broken open, imaged again on SEM	425-600	CH_4-6_032	Globorotalia truncatulinoides
IP.308420	CH82-21	IPE.08178	0.01	43.288	-29.83	1000	determined by crew using onboard GPS	WGS84	2103	Calc Ooze	Imaged at 10x magnification, broken open, imaged again on SEM	425-600	CH_4-6_033	Globorotalia crassiformis
IP.308421	CH82-21	IPE.08178	0.01	43.288	-29.83	1000	determined by crew using onboard GPS	WGS84	2103	Calc Ooze	Imaged at 10x magnification, broken open, imaged again on SEM	425-600	CH_4-6_034	Globorotalia truncatulinoides
IP.308422	CH82-21	IPE.08178	0.01	43.288	-29.83	1000	determined by crew using onboard GPS	WGS84	2103	Calc Ooze	Imaged at 10x magnification, broken open, imaged again on SEM	425-600	CH_4-6_035	Globorotalia truncatulinoides
IP.308423	CH82-21	IPE.08178	0.01	43.288	-29.83	1000	determined by crew using onboard GPS	WGS84	2103	Calc Ooze	Imaged at 10x magnification, broken open, imaged again on SEM	425-600	CH_4-6_036	Globorotalia truncatulinoides
IP.308424	CH82-21	IPE.08178	0.01	43.288	-29.83	1000	determined by crew using onboard GPS	WGS84	2103	Calc Ooze	Imaged at 10x magnification, broken open, imaged again on SEM	425-600	CH_4-6_037	Globorotalia truncatulinoides
IP.308425	CH82-21	IPE.08178	0.01	43.288	-29.83	1000	determined by crew using onboard GPS	WGS84	2103	Calc Ooze	Imaged at 10x magnification, broken open, imaged again on SEM	425-600	CH_4-6_038	Globorotalia inflata
IP.308426	CH82-21	IPE.08178	0.01	43.288	-29.83	1000	determined by crew using onboard GPS	WGS84	2103	Calc Ooze	Imaged at 10x magnification, broken open, imaged again on SEM	425-600	CH_4-6_039	Globorotalia truncatulinoides
IP.308427	CH82-21	IPE.08178	0.01	43.288	-29.83	1000	determined by crew using onboard GPS	WGS84	2103	Calc Ooze	Imaged at 10x magnification, broken open, imaged again on SEM	425-600	CH_4-6_004	Globorotalia inflata
IP.308428	CH82-21	IPE.08178	0.01	43.288	-29.83	1000	determined by crew using onboard GPS	WGS84	2103	Calc Ooze	Imaged at 10x magnification, broken open, imaged again on SEM	425-600	CH_4-6_040	Globorotalia inflata
IP.308429	CH82-21	IPE.08178	0.01	43.288	-29.83	1000	determined by crew using onboard GPS	WGS84	2103	Calc Ooze	Imaged at 10x magnification, broken open, imaged again on SEM	425-600	CH_4-6_041	Globorotalia hirsuta
IP.308430	CH82-21	IPE.08178	0.01	43.288	-29.83	1000	determined by crew using onboard GPS	WGS84	2103	Calc Ooze	Imaged at 10x magnification, broken open, imaged again on SEM	425-600	CH_4-6_042	Globorotalia hirsuta
IP.308431	CH82-21	IPE.08178	0.01	43.288	-29.83	1000	determined by crew using onboard GPS	WGS84	2103	Calc Ooze	Imaged at 10x magnification, broken open, imaged again on SEM	425-600	CH_4-6_043	Globorotalia truncatulinoides
IP.308432	CH82-21	IPE.08178	0.01	43.288	-29.83	1000	determined by crew using onboard GPS	WGS84	2103	Calc Ooze	Imaged at 10x magnification, broken open, imaged again on SEM	425-600	CH_4-6_044	Globorotalia hirsuta
IP.308433	CH82-21	IPE.08178	0.01	43.288	-29.83	1000	determined by crew using onboard GPS	WGS84	2103	Calc Ooze	Imaged at 10x magnification, broken open, imaged again on SEM	425-600	CH_4-6_045	Globorotalia truncatulinoides
IP.308434	CH82-21	IPE.08178	0.01	43.288	-29.83	1000	determined by crew using onboard GPS	WGS84	2103	Calc Ooze	Imaged at 10x magnification, broken open, imaged again on SEM	425-600	CH_4-6_046	Globorotalia truncatulinoides
IP.308435	CH82-21	IPE.08178	0.01	43.288	-29.83	1000	determined by crew using onboard GPS	WGS84	2103	Calc Ooze	Imaged at 10x magnification, broken open, imaged again on SEM	425-600	CH_4-6_047	Globorotalia crassiformis
IP.308436	CH82-21	IPE.08178	0.01	43.288	-29.83	1000	determined by crew using onboard GPS	WGS84	2103	Calc Ooze	Imaged at 10x magnification, broken open, imaged again on SEM	425-600	CH_4-6_048	Globorotalia hirsuta
IP.308437	CH82-21	IPE.08178	0.01	43.288	-29.83	1000	determined by crew using onboard GPS	WGS84	2103	Calc Ooze	Imaged at 10x magnification, broken open, imaged again on SEM	425-600	CH_4-6_049	Globorotalia truncatulinoides
IP.308438	CH82-21	IPE.08178	0.01	43.288	-29.83	1000	determined by crew using onboard GPS	WGS84	2103	Calc Ooze	Imaged at 10x magnification, broken open, imaged again on SEM	425-600	CH_4-6_005	Globorotalia truncatulinoides
IP.308439	CH82-21	IPE.08178	0.01	43.288	-29.83	1000	determined by crew using onboard GPS	WGS84	2103	Calc Ooze	Imaged at 10x magnification, broken open, imaged again on SEM	425-600	CH_4-6_050	Globorotalia inflata
IP.308440	CH82-21	IPE.08178	0.01	43.288	-29.83	1000	determined by crew using onboard GPS	WGS84	2103	Calc Ooze	Imaged at 10x magnification, broken open, imaged again on SEM	425-600	CH_4-6_051	Globorotalia crassiformis
IP.308441	CH82-21	IPE.08178	0.01	43.288	-29.83	1000	determined by crew using onboard GPS	WGS84	2103	Calc Ooze	Imaged at 10x magnification, broken open, imaged again on SEM	425-600	CH_4-6_052	Globorotalia crassiformis
IP.308442	CH82-21	IPE.08178	0.01	43.288	-29.83	1000	determined by crew using onboard GPS	WGS84	2103	Calc Ooze	Imaged at 10x magnification, broken open, imaged again on SEM	425-600	CH_4-6_053	Globorotalia truncatulinoides
IP.308443	CH82-21	IPE.08178	0.01	43.288	-29.83	1000	determined by crew using onboard GPS	WGS84	2103	Calc Ooze	Imaged at 10x magnification, broken open, imaged again on SEM	425-600	CH_4-6_054	Globorotalia truncatulinoides
IP.308444	CH82-21	IPE.08178	0.01	43.288	-29.83	1000	determined by crew using onboard GPS	WGS84	2103	Calc Ooze	Imaged at 10x magnification, broken open, imaged again on SEM	425-600	CH_4-6_055	Globorotalia truncatulinoides
IP.308445	CH82-21	IPE.08178	0.01	43.288	-29.83	1000	determined by crew using onboard GPS	WGS84	2103	Calc Ooze	Imaged at 10x magnification, broken open, imaged again on SEM	425-600	CH_4-6_056	Globorotalia hirsuta
IP.308446	CH82-21	IPE.08178	0.01	43.288	-29.83	1000	determined by crew using onboard GPS	WGS84	2103	Calc Ooze	Imaged at 10x magnification, broken open, imaged again on SEM	425-600	CH_4-6_057	Globorotalia inflata
IP.308447	CH82-21	IPE.08178	0.01	43.288	-29.83	1000	determined by crew using onboard GPS	WGS84	2103	Calc Ooze	Imaged at 10x magnification, broken open, imaged again on SEM	425-600	CH_4-6_058	Globorotalia truncatulinoides
IP.308448	CH82-21	IPE.08178	0.01	43.288	-29.83	1000	determined by crew using onboard GPS	WGS84	2103	Calc Ooze	Imaged at 10x magnification, broken open, imaged again on SEM	425-600	CH_4-6_059	Globorotalia truncatulinoides
IP.308449	CH82-21	IPE.08178	0.01	43.288	-29.83	1000	determined by crew using onboard GPS	WGS84	2103	Calc Ooze	Imaged at 10x magnification, broken open, imaged again on SEM	425-600	CH_4-6_006	Globorotalia truncatulinoides
IP.308450	CH82-21	IPE.08178	0.01	43.288	-29.83	1000	determined by crew using onboard GPS	WGS84	2103	Calc Ooze	Imaged at 10x magnification, broken open, imaged again on SEM	425-600	CH_4-6_060	Globorotalia hirsuta
IP.308451	CH82-21	IPE.08178	0.01	43.288	-29.83	1000	determined by crew using onboard GPS	WGS84	2103	Calc Ooze	Imaged at 10x magnification, broken open, imaged again on SEM	425-600	CH_4-6_061	Globorotalia truncatulinoides
IP.308452	CH82-21	IPE.08178	0.01	43.288	-29.83	1000	determined by crew using onboard GPS	WGS84	2103	Calc Ooze	Imaged at 10x magnification, broken open, imaged again on SEM	425-600	CH_4-6_062	Globorotalia hirsuta
IP.308453	CH82-21	IPE.08178	0.01	43.288	-29.83	1000	determined by crew using onboard GPS	WGS84	2103	Calc Ooze	Imaged at 10x magnification, broken open, imaged again on SEM	425-600	CH_4-6_063	Globorotalia inflata
IP.308454	CH82-21	IPE.08178	0.01	43.288	-29.83	1000	determined by crew using onboard GPS	WGS84	2103	Calc Ooze	Imaged at 10x magnification, broken open, imaged again on SEM	425-600	CH_4-6_064	Globorotalia crassiformis
IP.308455	CH82-21	IPE.08178	0.01	43.288	-29.83	1000	determined by crew using onboard GPS	WGS84	2103	Calc Ooze	Imaged at 10x magnification, broken open, imaged again on SEM	425-600	CH_4-6_065	Globorotalia truncatulinoides
IP.308456	CH82-21	IPE.08178	0.01	43.288	-29.83	1000	determined by crew using onboard GPS	WGS84	2103	Calc Ooze	Imaged at 10x magnification, broken open, imaged again on SEM	425-600	CH_4-6_066	Globorotalia hirsuta
IP.308457	CH82-21	IPE.08178	0.01	43.288	-29.83	1000	determined by crew using onboard GPS	WGS84	2103	Calc Ooze	Imaged at 10x magnification, broken open, imaged again on SEM	425-600	CH_4-6_067	Globorotalia truncatulinoides
IP.308458	CH82-21	IPE.08178	0.01	43.288	-29.83	1000	determined by crew using onboard GPS	WGS84	2103	Calc Ooze	Imaged at 10x magnification, broken open, imaged again on SEM	425-600	CH_4-6_068	Globorotalia hirsuta
IP.308459	CH82-21	IPE.08178	0.01	43.288	-29.83	1000	determined by crew using onboard GPS	WGS84	2103	Calc Ooze	Imaged at 10x magnification, broken open, imaged again on SEM	425-600	CH_4-6_069	Globorotalia truncatulinoides
IP.308460	CH82-21	IPE.08178	0.01	43.288	-29.83	1000	determined by crew using onboard GPS	WGS84	2103	Calc Ooze	Imaged at 10x magnification, broken open, imaged again on SEM	425-600	CH_4-6_007	Globorotalia crassiformis
IP.308461	CH82-21	IPE.08178	0.01	43.288	-29.83	1000	determined by crew using onboard GPS	WGS84	2103	Calc Ooze	Imaged at 10x magnification, broken open, imaged again on SEM	425-600	CH_4-6_070	Globorotalia truncatulinoides
IP.308462	CH82-21	IPE.08178	0.01	43.288	-29.83	1000	determined by crew using onboard GPS	WGS84	2103	Calc Ooze	Imaged at 10x magnification, broken open, imaged again on SEM	425-600	CH_4-6_071	Globorotalia truncatulinoides
IP.308463	CH82-21	IPE.08178	0.01	43.288	-29.83	1000	determined by crew using onboard GPS	WGS84	2103	Calc Ooze	Imaged at 10x magnification, broken open, imaged again on SEM	425-600	CH_4-6_072	Globorotalia hirsuta
IP.308464	CH82-21	IPE.08178	0.01	43.288	-29.83	1000	determined by crew using onboard GPS	WGS84	2103	Calc Ooze	Imaged at 10x magnification, broken open, imaged again on SEM	425-600	CH_4-6_073	Globorotalia hirsuta
IP.308465	CH82-21	IPE.08178	0.01	43.288	-29.83	1000	determined by crew using onboard GPS	WGS84	2103	Calc Ooze	Imaged at 10x magnification, broken open, imaged again on SEM	425-600	CH_4-6_074	Globorotalia hirsuta
IP.308466	CH82-21	IPE.08178	0.01	43.288	-29.83	1000	determined by crew using onboard GPS	WGS84	2103	Calc Ooze	Imaged at 10x magnification, broken open, imaged again on SEM	425-600	CH_4-6_075	Globorotalia truncatulinoides
IP.308467	CH82-21	IPE.08178	0.01	43.288	-29.83	1000	determined by crew using onboard GPS	WGS84	2103	Calc Ooze	Imaged at 10x magnification, broken open, imaged again on SEM	425-600	CH_4-6_076	Globorotalia truncatulinoides
IP.308468	CH82-21	IPE.08178	0.01	43.288	-29.83	1000	determined by crew using onboard GPS	WGS84	2103	Calc Ooze	Imaged at 10x magnification, broken open, imaged again on SEM	425-600	CH_4-6_008	Globorotalia hirsuta
IP.308469	CH82-21	IPE.08178	0.01	43.288	-29.83	1000	determined by crew using onboard GPS	WGS84	2103	Calc Ooze	Imaged at 10x magnification, broken open, imaged again on SEM	425-600	CH_4-6_009	Globorotalia truncatulinoides
IP.308470	EW9303-04	IPE.08231	0.01	64.71	-28.91	1000	determined by crew using onboard GPS	WGS84	1349		Imaged at 10x magnification, broken open, imaged again on SEM	250-300	EW_2-3_001	Globigerina bulloides
IP.308471	EW9303-04	IPE.08231	0.01	64.71	-28.91	1000	determined by crew using onboard GPS	WGS84	1349		Imaged at 10x magnification, broken open, imaged again on SEM	250-300	EW_2-3_010	Globigerina bulloides
IP.308472	EW9303-04	IPE.08231	0.01	64.71	-28.91	1000	determined by crew using onboard GPS	WGS84	1349		Imaged at 10x magnification, broken open, imaged again on SEM	250-300	EW_2-3_011	Globigerina bulloides
IP.308473	EW9303-04	IPE.08231	0.01	64.71	-28.91	1000	determined by crew using onboard GPS	WGS84	1349		Imaged at 10x magnification, broken open, imaged again on SEM	250-300	EW_2-3_012	Globigerina bulloides
IP.308474	EW9303-04	IPE.08231	0.01	64.71	-28.91	1000	determined by crew using onboard GPS	WGS84	1349		Imaged at 10x magnification, broken open, imaged again on SEM	250-300	EW_2-3_013	Globigerina bulloides
IP.308475	EW9303-04	IPE.08231	0.01	64.71	-28.91	1000	determined by crew using onboard GPS	WGS84	1349		Imaged at 10x magnification, broken open, imaged again on SEM	250-300	EW_2-3_014	Neogloboquadrina pachyderma
IP.308476	EW9303-04	IPE.08231	0.01	64.71	-28.91	1000	determined by crew using onboard GPS	WGS84	1349		Imaged at 10x magnification, broken open, imaged again on SEM	250-300	EW_2-3_015	Globigerina bulloides
IP.308477	EW9303-04	IPE.08231	0.01	64.71	-28.91	1000	determined by crew using onboard GPS	WGS84	1349		Imaged at 10x magnification, broken open, imaged again on SEM	250-300	EW_2-3_016	Globigerina bulloides
IP.308478	EW9303-04	IPE.08231	0.01	64.71	-28.91	1000	determined by crew using onboard GPS	WGS84	1349		Imaged at 10x magnification, broken open, imaged again on SEM	250-300	EW_2-3_017	Globigerina bulloides
IP.308479	EW9303-04	IPE.08231	0.01	64.71	-28.91	1000	determined by crew using onboard GPS	WGS84	1349		Imaged at 10x magnification, broken open, imaged again on SEM	250-300	EW_2-3_018	Unknown
IP.308480	EW9303-04	IPE.08231	0.01	64.71	-28.91	1000	determined by crew using onboard GPS	WGS84	1349		Imaged at 10x magnification, broken open, imaged again on SEM	250-300	EW_2-3_019	Globigerina bulloides
IP.308481	EW9303-04	IPE.08231	0.01	64.71	-28.91	1000	determined by crew using onboard GPS	WGS84	1349		Imaged at 10x magnification, broken open, imaged again on SEM	250-300	EW_2-3_002	Globigerina bulloides
IP.308482	EW9303-04	IPE.08231	0.01	64.71	-28.91	1000	determined by crew using onboard GPS	WGS84	1349		Imaged at 10x magnification, broken open, imaged again on SEM	250-300	EW_2-3_020	Globigerina bulloides
IP.308483	EW9303-04	IPE.08231	0.01	64.71	-28.91	1000	determined by crew using onboard GPS	WGS84	1349		Imaged at 10x magnification, broken open, imaged again on SEM	250-300	EW_2-3_021	Globigerina bulloides
IP.308484	EW9303-04	IPE.08231	0.01	64.71	-28.91	1000	determined by crew using onboard GPS	WGS84	1349		Imaged at 10x magnification, broken open, imaged again on SEM	250-300	EW_2-3_022	Globigerina bulloides
IP.308485	EW9303-04	IPE.08231	0.01	64.71	-28.91	1000	determined by crew using onboard GPS	WGS84	1349		Imaged at 10x magnification, broken open, imaged again on SEM	250-300	EW_2-3_023	Globigerina bulloides
IP.308486	EW9303-04	IPE.08231	0.01	64.71	-28.91	1000	determined by crew using onboard GPS	WGS84	1349		Imaged at 10x magnification, broken open, imaged again on SEM	250-300	EW_2-3_024	Globigerina falconensis
IP.308487	EW9303-04	IPE.08231	0.01	64.71	-28.91	1000	determined by crew using onboard GPS	WGS84	1349		Imaged at 10x magnification, broken open, imaged again on SEM	250-300	EW_2-3_025	Unknown
IP.308488	EW9303-04	IPE.08231	0.01	64.71	-28.91	1000	determined by crew using onboard GPS	WGS84	1349		Imaged at 10x magnification, broken open, imaged again on SEM	250-300	EW_2-3_026	Globigerina bulloides
IP.308489	EW9303-04	IPE.08231	0.01	64.71	-28.91	1000	determined by crew using onboard GPS	WGS84	1349		Imaged at 10x magnification, broken open, imaged again on SEM	250-300	EW_2-3_027	Globigerina bulloides
IP.308490	EW9303-04	IPE.08231	0.01	64.71	-28.91	1000	determined by crew using onboard GPS	WGS84	1349		Imaged at 10x magnification, broken open, imaged again on SEM	250-300	EW_2-3_028	Globigerina bulloides
IP.308491	EW9303-04	IPE.08231	0.01	64.71	-28.91	1000	determined by crew using onboard GPS	WGS84	1349		Imaged at 10x magnification, broken open, imaged again on SEM	250-300	EW_2-3_029	Globigerina bulloides
IP.308492	EW9303-04	IPE.08231	0.01	64.71	-28.91	1000	determined by crew using onboard GPS	WGS84	1349		Imaged at 10x magnification, broken open, imaged again on SEM	250-300	EW_2-3_003	Neogloboquadrina pachyderma
IP.308493	EW9303-04	IPE.08231	0.01	64.71	-28.91	1000	determined by crew using onboard GPS	WGS84	1349		Imaged at 10x magnification, broken open, imaged again on SEM	250-300	EW_2-3_030	Globigerina bulloides
IP.308494	EW9303-04	IPE.08231	0.01	64.71	-28.91	1000	determined by crew using onboard GPS	WGS84	1349		Imaged at 10x magnification, broken open, imaged again on SEM	250-300	EW_2-3_031	Globigerina bulloides
IP.308495	EW9303-04	IPE.08231	0.01	64.71	-28.91	1000	determined by crew using onboard GPS	WGS84	1349		Imaged at 10x magnification, broken open, imaged again on SEM	250-300	EW_2-3_032	Globigerina bulloides
IP.308496	EW9303-04	IPE.08231	0.01	64.71	-28.91	1000	determined by crew using onboard GPS	WGS84	1349		Imaged at 10x magnification, broken open, imaged again on SEM	250-300	EW_2-3_033	Globigerina bulloides
IP.308497	EW9303-04	IPE.08231	0.01	64.71	-28.91	1000	determined by crew using onboard GPS	WGS84	1349		Imaged at 10x magnification, broken open, imaged again on SEM	250-300	EW_2-3_034	Globigerina bulloides
IP.308498	EW9303-04	IPE.08231	0.01	64.71	-28.91	1000	determined by crew using onboard GPS	WGS84	1349		Imaged at 10x magnification, broken open, imaged again on SEM	250-300	EW_2-3_035	Globigerina bulloides
IP.308499	EW9303-04	IPE.08231	0.01	64.71	-28.91	1000	determined by crew using onboard GPS	WGS84	1349		Imaged at 10x magnification, broken open, imaged again on SEM	250-300	EW_2-3_036	Globigerina bulloides
IP.308500	EW9303-04	IPE.08231	0.01	64.71	-28.91	1000	determined by crew using onboard GPS	WGS84	1349		Imaged at 10x magnification, broken open, imaged again on SEM	250-300	EW_2-3_037	Neogloboquadrina incompta
IP.308501	EW9303-04	IPE.08231	0.01	64.71	-28.91	1000	determined by crew using onboard GPS	WGS84	1349		Imaged at 10x magnification, broken open, imaged again on SEM	250-300	EW_2-3_038	Globigerina bulloides
IP.308502	EW9303-04	IPE.08231	0.01	64.71	-28.91	1000	determined by crew using onboard GPS	WGS84	1349		Imaged at 10x magnification, broken open, imaged again on SEM	250-300	EW_2-3_039	Globigerina bulloides
IP.308503	EW9303-04	IPE.08231	0.01	64.71	-28.91	1000	determined by crew using onboard GPS	WGS84	1349		Imaged at 10x magnification, broken open, imaged again on SEM	250-300	EW_2-3_004	Globigerina bulloides
IP.308504	EW9303-04	IPE.08231	0.01	64.71	-28.91	1000	determined by crew using onboard GPS	WGS84	1349		Imaged at 10x magnification, broken open, imaged again on SEM	250-300	EW_2-3_040	Globigerina bulloides
IP.308505	EW9303-04	IPE.08231	0.01	64.71	-28.91	1000	determined by crew using onboard GPS	WGS84	1349		Imaged at 10x magnification, broken open, imaged again on SEM	250-300	EW_2-3_041	Neogloboquadrina incompta
IP.308506	EW9303-04	IPE.08231	0.01	64.71	-28.91	1000	determined by crew using onboard GPS	WGS84	1349		Imaged at 10x magnification, broken open, imaged again on SEM	250-300	EW_2-3_042	Globigerina bulloides
IP.308507	EW9303-04	IPE.08231	0.01	64.71	-28.91	1000	determined by crew using onboard GPS	WGS84	1349		Imaged at 10x magnification, broken open, imaged again on SEM	250-300	EW_2-3_043	Neogloboquadrina incompta
IP.308508	EW9303-04	IPE.08231	0.01	64.71	-28.91	1000	determined by crew using onboard GPS	WGS84	1349		Imaged at 10x magnification, broken open, imaged again on SEM	250-300	EW_2-3_044	Unknown
IP.308509	EW9303-04	IPE.08231	0.01	64.71	-28.91	1000	determined by crew using onboard GPS	WGS84	1349		Imaged at 10x magnification, broken open, imaged again on SEM	250-300	EW_2-3_045	Unknown
IP.308510	EW9303-04	IPE.08231	0.01	64.71	-28.91	1000	determined by crew using onboard GPS	WGS84	1349		Imaged at 10x magnification, broken open, imaged again on SEM	250-300	EW_2-3_046	Globigerina bulloides
IP.308511	EW9303-04	IPE.08231	0.01	64.71	-28.91	1000	determined by crew using onboard GPS	WGS84	1349		Imaged at 10x magnification, broken open, imaged again on SEM	250-300	EW_2-3_047	Globigerina bulloides
IP.308512	EW9303-04	IPE.08231	0.01	64.71	-28.91	1000	determined by crew using onboard GPS	WGS84	1349		Imaged at 10x magnification, broken open, imaged again on SEM	250-300	EW_2-3_048	Globigerina falconensis
IP.308513	EW9303-04	IPE.08231	0.01	64.71	-28.91	1000	determined by crew using onboard GPS	WGS84	1349		Imaged at 10x magnification, broken open, imaged again on SEM	250-300	EW_2-3_049	Globigerina falconensis
IP.308514	EW9303-04	IPE.08231	0.01	64.71	-28.91	1000	determined by crew using onboard GPS	WGS84	1349		Imaged at 10x magnification, broken open, imaged again on SEM	250-300	EW_2-3_005	Globigerina bulloides
IP.308515	EW9303-04	IPE.08231	0.01	64.71	-28.91	1000	determined by crew using onboard GPS	WGS84	1349		Imaged at 10x magnification, broken open, imaged again on SEM	250-300	EW_2-3_050	Globigerina bulloides
IP.308516	EW9303-04	IPE.08231	0.01	64.71	-28.91	1000	determined by crew using onboard GPS	WGS84	1349		Imaged at 10x magnification, broken open, imaged again on SEM	250-300	EW_2-3_051	Unknown
IP.308517	EW9303-04	IPE.08231	0.01	64.71	-28.91	1000	determined by crew using onboard GPS	WGS84	1349		Imaged at 10x magnification, broken open, imaged again on SEM	250-300	EW_2-3_052	Globigerina bulloides
IP.308518	EW9303-04	IPE.08231	0.01	64.71	-28.91	1000	determined by crew using onboard GPS	WGS84	1349		Imaged at 10x magnification, broken open, imaged again on SEM	250-300	EW_2-3_053	Globigerina bulloides
IP.308519	EW9303-04	IPE.08231	0.01	64.71	-28.91	1000	determined by crew using onboard GPS	WGS84	1349		Imaged at 10x magnification, broken open, imaged again on SEM	250-300	EW_2-3_054	Globigerina bulloides
IP.308520	EW9303-04	IPE.08231	0.01	64.71	-28.91	1000	determined by crew using onboard GPS	WGS84	1349		Imaged at 10x magnification, broken open, imaged again on SEM	250-300	EW_2-3_055	Unknown
IP.308521	EW9303-04	IPE.08231	0.01	64.71	-28.91	1000	determined by crew using onboard GPS	WGS84	1349		Imaged at 10x magnification, broken open, imaged again on SEM	250-300	EW_2-3_056	Unknown
IP.308522	EW9303-04	IPE.08231	0.01	64.71	-28.91	1000	determined by crew using onboard GPS	WGS84	1349		Imaged at 10x magnification, broken open, imaged again on SEM	250-300	EW_2-3_057	Globigerina bulloides
IP.308523	EW9303-04	IPE.08231	0.01	64.71	-28.91	1000	determined by crew using onboard GPS	WGS84	1349		Imaged at 10x magnification, broken open, imaged again on SEM	250-300	EW_2-3_058	Globigerina bulloides
IP.308524	EW9303-04	IPE.08231	0.01	64.71	-28.91	1000	determined by crew using onboard GPS	WGS84	1349		Imaged at 10x magnification, broken open, imaged again on SEM	250-300	EW_2-3_059	Unknown
IP.308525	EW9303-04	IPE.08231	0.01	64.71	-28.91	1000	determined by crew using onboard GPS	WGS84	1349		Imaged at 10x magnification, broken open, imaged again on SEM	250-300	EW_2-3_006	Neogloboquadrina incompta
IP.308526	EW9303-04	IPE.08231	0.01	64.71	-28.91	1000	determined by crew using onboard GPS	WGS84	1349		Imaged at 10x magnification, broken open, imaged again on SEM	250-300	EW_2-3_060	Globigerinita glutinata
IP.308527	EW9303-04	IPE.08231	0.01	64.71	-28.91	1000	determined by crew using onboard GPS	WGS84	1349		Imaged at 10x magnification, broken open, imaged again on SEM	250-300	EW_2-3_061	Globigerina bulloides
IP.308528	EW9303-04	IPE.08231	0.01	64.71	-28.91	1000	determined by crew using onboard GPS	WGS84	1349		Imaged at 10x magnification, broken open, imaged again on SEM	250-300	EW_2-3_062	Globigerina bulloides
IP.308529	EW9303-04	IPE.08231	0.01	64.71	-28.91	1000	determined by crew using onboard GPS	WGS84	1349		Imaged at 10x magnification, broken open, imaged again on SEM	250-300	EW_2-3_063	Globigerina bulloides
IP.308530	EW9303-04	IPE.08231	0.01	64.71	-28.91	1000	determined by crew using onboard GPS	WGS84	1349		Imaged at 10x magnification, broken open, imaged again on SEM	250-300	EW_2-3_064	Globigerina bulloides
IP.308531	EW9303-04	IPE.08231	0.01	64.71	-28.91	1000	determined by crew using onboard GPS	WGS84	1349		Imaged at 10x magnification, broken open, imaged again on SEM	250-300	EW_2-3_065	Neogloboquadrina incompta
IP.308532	EW9303-04	IPE.08231	0.01	64.71	-28.91	1000	determined by crew using onboard GPS	WGS84	1349		Imaged at 10x magnification, broken open, imaged again on SEM	250-300	EW_2-3_066	Neogloboquadrina incompta
IP.308533	EW9303-04	IPE.08231	0.01	64.71	-28.91	1000	determined by crew using onboard GPS	WGS84	1349		Imaged at 10x magnification, broken open, imaged again on SEM	250-300	EW_2-3_067	Globigerina bulloides
IP.308534	EW9303-04	IPE.08231	0.01	64.71	-28.91	1000	determined by crew using onboard GPS	WGS84	1349		Imaged at 10x magnification, broken open, imaged again on SEM	250-300	EW_2-3_068	Globigerina bulloides
IP.308535	EW9303-04	IPE.08231	0.01	64.71	-28.91	1000	determined by crew using onboard GPS	WGS84	1349		Imaged at 10x magnification, broken open, imaged again on SEM	250-300	EW_2-3_069	Globigerina bulloides
IP.308536	EW9303-04	IPE.08231	0.01	64.71	-28.91	1000	determined by crew using onboard GPS	WGS84	1349		Imaged at 10x magnification, broken open, imaged again on SEM	250-300	EW_2-3_007	Unknown
IP.308537	EW9303-04	IPE.08231	0.01	64.71	-28.91	1000	determined by crew using onboard GPS	WGS84	1349		Imaged at 10x magnification, broken open, imaged again on SEM	250-300	EW_2-3_070	Unknown
IP.308538	EW9303-04	IPE.08231	0.01	64.71	-28.91	1000	determined by crew using onboard GPS	WGS84	1349		Imaged at 10x magnification, broken open, imaged again on SEM	250-300	EW_2-3_008	Globigerina bulloides
IP.308539	EW9303-04	IPE.08231	0.01	64.71	-28.91	1000	determined by crew using onboard GPS	WGS84	1349		Imaged at 10x magnification, broken open, imaged again on SEM	250-300	EW_2-3_009	Globigerina bulloides
IP.308540	EW9303-04	IPE.08231	0.01	64.71	-28.91	1000	determined by crew using onboard GPS	WGS84	1349		Imaged at 10x magnification, broken open, imaged again on SEM	300-425	EW_3-4_001	Globorotalia inflata
IP.308541	EW9303-04	IPE.08231	0.01	64.71	-28.91	1000	determined by crew using onboard GPS	WGS84	1349		Imaged at 10x magnification, broken open, imaged again on SEM	300-425	EW_3-4_010	Globigerina bulloides
IP.308542	EW9303-04	IPE.08231	0.01	64.71	-28.91	1000	determined by crew using onboard GPS	WGS84	1349		Imaged at 10x magnification, broken open, imaged again on SEM	300-425	EW_3-4_011	Globigerina bulloides
IP.308543	EW9303-04	IPE.08231	0.01	64.71	-28.91	1000	determined by crew using onboard GPS	WGS84	1349		Imaged at 10x magnification, broken open, imaged again on SEM	300-425	EW_3-4_012	Globigerina bulloides
IP.308544	EW9303-04	IPE.08231	0.01	64.71	-28.91	1000	determined by crew using onboard GPS	WGS84	1349		Imaged at 10x magnification, broken open, imaged again on SEM	300-425	EW_3-4_013	Globigerina bulloides
IP.308545	EW9303-04	IPE.08231	0.01	64.71	-28.91	1000	determined by crew using onboard GPS	WGS84	1349		Imaged at 10x magnification, broken open, imaged again on SEM	300-425	EW_3-4_014	Globigerina bulloides
IP.308546	EW9303-04	IPE.08231	0.01	64.71	-28.91	1000	determined by crew using onboard GPS	WGS84	1349		Imaged at 10x magnification, broken open, imaged again on SEM	300-425	EW_3-4_015	Globigerina bulloides
IP.308547	EW9303-04	IPE.08231	0.01	64.71	-28.91	1000	determined by crew using onboard GPS	WGS84	1349		Imaged at 10x magnification, broken open, imaged again on SEM	300-425	EW_3-4_016	Unknown
IP.308548	EW9303-04	IPE.08231	0.01	64.71	-28.91	1000	determined by crew using onboard GPS	WGS84	1349		Imaged at 10x magnification, broken open, imaged again on SEM	300-425	EW_3-4_017	Globigerina bulloides
IP.308549	EW9303-04	IPE.08231	0.01	64.71	-28.91	1000	determined by crew using onboard GPS	WGS84	1349		Imaged at 10x magnification, broken open, imaged again on SEM	300-425	EW_3-4_018	Globigerina bulloides
IP.308550	EW9303-04	IPE.08231	0.01	64.71	-28.91	1000	determined by crew using onboard GPS	WGS84	1349		Imaged at 10x magnification, broken open, imaged again on SEM	300-425	EW_3-4_019	Globigerina bulloides
IP.308551	EW9303-04	IPE.08231	0.01	64.71	-28.91	1000	determined by crew using onboard GPS	WGS84	1349		Imaged at 10x magnification, broken open, imaged again on SEM	300-425	EW_3-4_002	Unknown
IP.308552	EW9303-04	IPE.08231	0.01	64.71	-28.91	1000	determined by crew using onboard GPS	WGS84	1349		Imaged at 10x magnification, broken open, imaged again on SEM	300-425	EW_3-4_020	Globigerina bulloides
IP.308553	EW9303-04	IPE.08231	0.01	64.71	-28.91	1000	determined by crew using onboard GPS	WGS84	1349		Imaged at 10x magnification, broken open, imaged again on SEM	300-425	EW_3-4_021	Globigerina bulloides
IP.308554	EW9303-04	IPE.08231	0.01	64.71	-28.91	1000	determined by crew using onboard GPS	WGS84	1349		Imaged at 10x magnification, broken open, imaged again on SEM	300-425	EW_3-4_022	Globigerinella siphonifera
IP.308555	EW9303-04	IPE.08231	0.01	64.71	-28.91	1000	determined by crew using onboard GPS	WGS84	1349		Imaged at 10x magnification, broken open, imaged again on SEM	300-425	EW_3-4_023	Globigerina bulloides
IP.308556	EW9303-04	IPE.08231	0.01	64.71	-28.91	1000	determined by crew using onboard GPS	WGS84	1349		Imaged at 10x magnification, broken open, imaged again on SEM	300-425	EW_3-4_024	Globigerina bulloides
IP.308557	EW9303-04	IPE.08231	0.01	64.71	-28.91	1000	determined by crew using onboard GPS	WGS84	1349		Imaged at 10x magnification, broken open, imaged again on SEM	300-425	EW_3-4_025	Globigerina bulloides
IP.308558	EW9303-04	IPE.08231	0.01	64.71	-28.91	1000	determined by crew using onboard GPS	WGS84	1349		Imaged at 10x magnification, broken open, imaged again on SEM	300-425	EW_3-4_026	Globigerina bulloides
IP.308559	EW9303-04	IPE.08231	0.01	64.71	-28.91	1000	determined by crew using onboard GPS	WGS84	1349		Imaged at 10x magnification, broken open, imaged again on SEM	300-425	EW_3-4_027	Globigerina bulloides
IP.308560	EW9303-04	IPE.08231	0.01	64.71	-28.91	1000	determined by crew using onboard GPS	WGS84	1349		Imaged at 10x magnification, broken open, imaged again on SEM	300-425	EW_3-4_028	Globigerina bulloides
IP.308561	EW9303-04	IPE.08231	0.01	64.71	-28.91	1000	determined by crew using onboard GPS	WGS84	1349		Imaged at 10x magnification, broken open, imaged again on SEM	300-425	EW_3-4_029	Globigerina bulloides
IP.308562	EW9303-04	IPE.08231	0.01	64.71	-28.91	1000	determined by crew using onboard GPS	WGS84	1349		Imaged at 10x magnification, broken open, imaged again on SEM	300-425	EW_3-4_003	Globigerina bulloides
IP.308563	EW9303-04	IPE.08231	0.01	64.71	-28.91	1000	determined by crew using onboard GPS	WGS84	1349		Imaged at 10x magnification, broken open, imaged again on SEM	300-425	EW_3-4_030	Globigerina bulloides
IP.308564	EW9303-04	IPE.08231	0.01	64.71	-28.91	1000	determined by crew using onboard GPS	WGS84	1349		Imaged at 10x magnification, broken open, imaged again on SEM	300-425	EW_3-4_031	Globigerina bulloides
IP.308565	EW9303-04	IPE.08231	0.01	64.71	-28.91	1000	determined by crew using onboard GPS	WGS84	1349		Imaged at 10x magnification, broken open, imaged again on SEM	300-425	EW_3-4_032	Globigerina bulloides
IP.308566	EW9303-04	IPE.08231	0.01	64.71	-28.91	1000	determined by crew using onboard GPS	WGS84	1349		Imaged at 10x magnification, broken open, imaged again on SEM	300-425	EW_3-4_033	Globigerina bulloides
IP.308567	EW9303-04	IPE.08231	0.01	64.71	-28.91	1000	determined by crew using onboard GPS	WGS84	1349		Imaged at 10x magnification, broken open, imaged again on SEM	300-425	EW_3-4_034	Globigerina bulloides
IP.308568	EW9303-04	IPE.08231	0.01	64.71	-28.91	1000	determined by crew using onboard GPS	WGS84	1349		Imaged at 10x magnification, broken open, imaged again on SEM	300-425	EW_3-4_035	Globigerina bulloides
IP.308569	EW9303-04	IPE.08231	0.01	64.71	-28.91	1000	determined by crew using onboard GPS	WGS84	1349		Imaged at 10x magnification, broken open, imaged again on SEM	300-425	EW_3-4_036	Globigerina bulloides
IP.308570	EW9303-04	IPE.08231	0.01	64.71	-28.91	1000	determined by crew using onboard GPS	WGS84	1349		Imaged at 10x magnification, broken open, imaged again on SEM	300-425	EW_3-4_037	Globigerina bulloides
IP.308571	EW9303-04	IPE.08231	0.01	64.71	-28.91	1000	determined by crew using onboard GPS	WGS84	1349		Imaged at 10x magnification, broken open, imaged again on SEM	300-425	EW_3-4_038	Globigerina bulloides
IP.308572	EW9303-04	IPE.08231	0.01	64.71	-28.91	1000	determined by crew using onboard GPS	WGS84	1349		Imaged at 10x magnification, broken open, imaged again on SEM	300-425	EW_3-4_039	Globigerina bulloides
IP.308573	EW9303-04	IPE.08231	0.01	64.71	-28.91	1000	determined by crew using onboard GPS	WGS84	1349		Imaged at 10x magnification, broken open, imaged again on SEM	300-425	EW_3-4_004	Globigerina bulloides
IP.308574	EW9303-04	IPE.08231	0.01	64.71	-28.91	1000	determined by crew using onboard GPS	WGS84	1349		Imaged at 10x magnification, broken open, imaged again on SEM	300-425	EW_3-4_040	Globigerinoides ruber
IP.308575	EW9303-04	IPE.08231	0.01	64.71	-28.91	1000	determined by crew using onboard GPS	WGS84	1349		Imaged at 10x magnification, broken open, imaged again on SEM	300-425	EW_3-4_041	Globigerina bulloides
IP.308576	EW9303-04	IPE.08231	0.01	64.71	-28.91	1000	determined by crew using onboard GPS	WGS84	1349		Imaged at 10x magnification, broken open, imaged again on SEM	300-425	EW_3-4_042	Globigerina bulloides
IP.308577	EW9303-04	IPE.08231	0.01	64.71	-28.91	1000	determined by crew using onboard GPS	WGS84	1349		Imaged at 10x magnification, broken open, imaged again on SEM	300-425	EW_3-4_043	Globigerina bulloides
IP.308578	EW9303-04	IPE.08231	0.01	64.71	-28.91	1000	determined by crew using onboard GPS	WGS84	1349		Imaged at 10x magnification, broken open, imaged again on SEM	300-425	EW_3-4_044	Globigerina bulloides
IP.308579	EW9303-04	IPE.08231	0.01	64.71	-28.91	1000	determined by crew using onboard GPS	WGS84	1349		Imaged at 10x magnification, broken open, imaged again on SEM	300-425	EW_3-4_045	Globigerina bulloides
IP.308580	EW9303-04	IPE.08231	0.01	64.71	-28.91	1000	determined by crew using onboard GPS	WGS84	1349		Imaged at 10x magnification, broken open, imaged again on SEM	300-425	EW_3-4_046	Unknown
IP.308581	EW9303-04	IPE.08231	0.01	64.71	-28.91	1000	determined by crew using onboard GPS	WGS84	1349		Imaged at 10x magnification, broken open, imaged again on SEM	300-425	EW_3-4_047	Globigerina bulloides
IP.308582	EW9303-04	IPE.08231	0.01	64.71	-28.91	1000	determined by crew using onboard GPS	WGS84	1349		Imaged at 10x magnification, broken open, imaged again on SEM	300-425	EW_3-4_048	Globigerina bulloides
IP.308583	EW9303-04	IPE.08231	0.01	64.71	-28.91	1000	determined by crew using onboard GPS	WGS84	1349		Imaged at 10x magnification, broken open, imaged again on SEM	300-425	EW_3-4_049	Globigerina bulloides
IP.308584	EW9303-04	IPE.08231	0.01	64.71	-28.91	1000	determined by crew using onboard GPS	WGS84	1349		Imaged at 10x magnification, broken open, imaged again on SEM	300-425	EW_3-4_005	Globigerina bulloides
IP.308585	EW9303-04	IPE.08231	0.01	64.71	-28.91	1000	determined by crew using onboard GPS	WGS84	1349		Imaged at 10x magnification, broken open, imaged again on SEM	300-425	EW_3-4_050	Globigerina bulloides
IP.308586	EW9303-04	IPE.08231	0.01	64.71	-28.91	1000	determined by crew using onboard GPS	WGS84	1349		Imaged at 10x magnification, broken open, imaged again on SEM	300-425	EW_3-4_051	Globigerina bulloides
IP.308587	EW9303-04	IPE.08231	0.01	64.71	-28.91	1000	determined by crew using onboard GPS	WGS84	1349		Imaged at 10x magnification, broken open, imaged again on SEM	300-425	EW_3-4_052	Globigerina bulloides
IP.308588	EW9303-04	IPE.08231	0.01	64.71	-28.91	1000	determined by crew using onboard GPS	WGS84	1349		Imaged at 10x magnification, broken open, imaged again on SEM	300-425	EW_3-4_053	Globigerina bulloides
IP.308589	EW9303-04	IPE.08231	0.01	64.71	-28.91	1000	determined by crew using onboard GPS	WGS84	1349		Imaged at 10x magnification, broken open, imaged again on SEM	300-425	EW_3-4_054	Globigerina bulloides
IP.308590	EW9303-04	IPE.08231	0.01	64.71	-28.91	1000	determined by crew using onboard GPS	WGS84	1349		Imaged at 10x magnification, broken open, imaged again on SEM	300-425	EW_3-4_055	Globigerina bulloides
IP.308591	EW9303-04	IPE.08231	0.01	64.71	-28.91	1000	determined by crew using onboard GPS	WGS84	1349		Imaged at 10x magnification, broken open, imaged again on SEM	300-425	EW_3-4_056	Globigerina bulloides
IP.308592	EW9303-04	IPE.08231	0.01	64.71	-28.91	1000	determined by crew using onboard GPS	WGS84	1349		Imaged at 10x magnification, broken open, imaged again on SEM	300-425	EW_3-4_057	Globigerina bulloides
IP.308593	EW9303-04	IPE.08231	0.01	64.71	-28.91	1000	determined by crew using onboard GPS	WGS84	1349		Imaged at 10x magnification, broken open, imaged again on SEM	300-425	EW_3-4_058	Globigerina bulloides
IP.308594	EW9303-04	IPE.08231	0.01	64.71	-28.91	1000	determined by crew using onboard GPS	WGS84	1349		Imaged at 10x magnification, broken open, imaged again on SEM	300-425	EW_3-4_059	Unknown
IP.308595	EW9303-04	IPE.08231	0.01	64.71	-28.91	1000	determined by crew using onboard GPS	WGS84	1349		Imaged at 10x magnification, broken open, imaged again on SEM	300-425	EW_3-4_006	Globigerina bulloides
IP.308596	EW9303-04	IPE.08231	0.01	64.71	-28.91	1000	determined by crew using onboard GPS	WGS84	1349		Imaged at 10x magnification, broken open, imaged again on SEM	300-425	EW_3-4_060	Unknown
IP.308597	EW9303-04	IPE.08231	0.01	64.71	-28.91	1000	determined by crew using onboard GPS	WGS84	1349		Imaged at 10x magnification, broken open, imaged again on SEM	300-425	EW_3-4_061	Globigerina bulloides
IP.308598	EW9303-04	IPE.08231	0.01	64.71	-28.91	1000	determined by crew using onboard GPS	WGS84	1349		Imaged at 10x magnification, broken open, imaged again on SEM	300-425	EW_3-4_062	Globigerina bulloides
IP.308599	EW9303-04	IPE.08231	0.01	64.71	-28.91	1000	determined by crew using onboard GPS	WGS84	1349		Imaged at 10x magnification, broken open, imaged again on SEM	300-425	EW_3-4_063	Globigerina bulloides
IP.308600	EW9303-04	IPE.08231	0.01	64.71	-28.91	1000	determined by crew using onboard GPS	WGS84	1349		Imaged at 10x magnification, broken open, imaged again on SEM	300-425	EW_3-4_064	Globigerina bulloides
IP.308601	EW9303-04	IPE.08231	0.01	64.71	-28.91	1000	determined by crew using onboard GPS	WGS84	1349		Imaged at 10x magnification, broken open, imaged again on SEM	300-425	EW_3-4_065	Globigerina bulloides
IP.308602	EW9303-04	IPE.08231	0.01	64.71	-28.91	1000	determined by crew using onboard GPS	WGS84	1349		Imaged at 10x magnification, broken open, imaged again on SEM	300-425	EW_3-4_066	Globigerina bulloides
IP.308603	EW9303-04	IPE.08231	0.01	64.71	-28.91	1000	determined by crew using onboard GPS	WGS84	1349		Imaged at 10x magnification, broken open, imaged again on SEM	300-425	EW_3-4_067	Globigerina bulloides
IP.308604	EW9303-04	IPE.08231	0.01	64.71	-28.91	1000	determined by crew using onboard GPS	WGS84	1349		Imaged at 10x magnification, broken open, imaged again on SEM	300-425	EW_3-4_068	Globigerina bulloides
IP.308605	EW9303-04	IPE.08231	0.01	64.71	-28.91	1000	determined by crew using onboard GPS	WGS84	1349		Imaged at 10x magnification, broken open, imaged again on SEM	300-425	EW_3-4_069	Globigerina bulloides
IP.308606	EW9303-04	IPE.08231	0.01	64.71	-28.91	1000	determined by crew using onboard GPS	WGS84	1349		Imaged at 10x magnification, broken open, imaged again on SEM	300-425	EW_3-4_007	Globigerina bulloides
IP.308607	EW9303-04	IPE.08231	0.01	64.71	-28.91	1000	determined by crew using onboard GPS	WGS84	1349		Imaged at 10x magnification, broken open, imaged again on SEM	300-425	EW_3-4_070	Globigerina bulloides
IP.308608	EW9303-04	IPE.08231	0.01	64.71	-28.91	1000	determined by crew using onboard GPS	WGS84	1349		Imaged at 10x magnification, broken open, imaged again on SEM	300-425	EW_3-4_071	Globigerina bulloides
IP.308609	EW9303-04	IPE.08231	0.01	64.71	-28.91	1000	determined by crew using onboard GPS	WGS84	1349		Imaged at 10x magnification, broken open, imaged again on SEM	300-425	EW_3-4_072	Globigerina bulloides
IP.308610	EW9303-04	IPE.08231	0.01	64.71	-28.91	1000	determined by crew using onboard GPS	WGS84	1349		Imaged at 10x magnification, broken open, imaged again on SEM	300-425	EW_3-4_073	Globigerina bulloides
IP.308611	EW9303-04	IPE.08231	0.01	64.71	-28.91	1000	determined by crew using onboard GPS	WGS84	1349		Imaged at 10x magnification, broken open, imaged again on SEM	300-425	EW_3-4_074	Globigerina bulloides
IP.308612	EW9303-04	IPE.08231	0.01	64.71	-28.91	1000	determined by crew using onboard GPS	WGS84	1349		Imaged at 10x magnification, broken open, imaged again on SEM	300-425	EW_3-4_075	Globigerina bulloides
IP.308613	EW9303-04	IPE.08231	0.01	64.71	-28.91	1000	determined by crew using onboard GPS	WGS84	1349		Imaged at 10x magnification, broken open, imaged again on SEM	300-425	EW_3-4_076	Globigerina bulloides
IP.308614	EW9303-04	IPE.08231	0.01	64.71	-28.91	1000	determined by crew using onboard GPS	WGS84	1349		Imaged at 10x magnification, broken open, imaged again on SEM	300-425	EW_3-4_077	Globigerina bulloides
IP.308615	EW9303-04	IPE.08231	0.01	64.71	-28.91	1000	determined by crew using onboard GPS	WGS84	1349		Imaged at 10x magnification, broken open, imaged again on SEM	300-425	EW_3-4_078	Globigerina bulloides
IP.308616	EW9303-04	IPE.08231	0.01	64.71	-28.91	1000	determined by crew using onboard GPS	WGS84	1349		Imaged at 10x magnification, broken open, imaged again on SEM	300-425	EW_3-4_079	Globigerina bulloides
IP.308617	EW9303-04	IPE.08231	0.01	64.71	-28.91	1000	determined by crew using onboard GPS	WGS84	1349		Imaged at 10x magnification, broken open, imaged again on SEM	300-425	EW_3-4_008	Globigerina bulloides
IP.308618	EW9303-04	IPE.08231	0.01	64.71	-28.91	1000	determined by crew using onboard GPS	WGS84	1349		Imaged at 10x magnification, broken open, imaged again on SEM	300-425	EW_3-4_009	Globigerina bulloides
IP.308619	KC78	IPE.08316	0	5.267	-44.133	1000	determined by crew using onboard GPS	WGS84	3273		Imaged at 10x magnification, broken open, imaged again on SEM	250-300	KC_2-3_01	Globigerinoides ruber
IP.308620	KC78	IPE.08316	0	5.267	-44.133	1000	determined by crew using onboard GPS	WGS84	3273		Imaged at 10x magnification, broken open, imaged again on SEM	250-300	KC_2-3_010	Globigerinoides ruber
IP.308621	KC78	IPE.08316	0	5.267	-44.133	1000	determined by crew using onboard GPS	WGS84	3273		Imaged at 10x magnification, broken open, imaged again on SEM	250-300	KC_2-3_011	Globigerinoides sacculifer
IP.308622	KC78	IPE.08316	0	5.267	-44.133	1000	determined by crew using onboard GPS	WGS84	3273		Imaged at 10x magnification, broken open, imaged again on SEM	250-300	KC_2-3_012	Globigerinella siphonifera
IP.308623	KC78	IPE.08316	0	5.267	-44.133	1000	determined by crew using onboard GPS	WGS84	3273		Imaged at 10x magnification, broken open, imaged again on SEM	250-300	KC_2-3_013	Globigerinoides ruber
IP.308624	KC78	IPE.08316	0	5.267	-44.133	1000	determined by crew using onboard GPS	WGS84	3273		Imaged at 10x magnification, broken open, imaged again on SEM	250-300	KC_2-3_014	Globigerinoides sacculifer
IP.308625	KC78	IPE.08316	0	5.267	-44.133	1000	determined by crew using onboard GPS	WGS84	3273		Imaged at 10x magnification, broken open, imaged again on SEM	250-300	KC_2-3_015	Globigerinoides ruber
IP.308626	KC78	IPE.08316	0	5.267	-44.133	1000	determined by crew using onboard GPS	WGS84	3273		Imaged at 10x magnification, broken open, imaged again on SEM	250-300	KC_2-3_016	Globigerinoides ruber
IP.308627	KC78	IPE.08316	0	5.267	-44.133	1000	determined by crew using onboard GPS	WGS84	3273		Imaged at 10x magnification, broken open, imaged again on SEM	250-300	KC_2-3_017	Globigerinoides ruber
IP.308628	KC78	IPE.08316	0	5.267	-44.133	1000	determined by crew using onboard GPS	WGS84	3273		Imaged at 10x magnification, broken open, imaged again on SEM	250-300	KC_2-3_018	Globigerinoides ruber
IP.308629	KC78	IPE.08316	0	5.267	-44.133	1000	determined by crew using onboard GPS	WGS84	3273		Imaged at 10x magnification, broken open, imaged again on SEM	250-300	KC_2-3_019	Globigerinoides ruber
IP.308630	KC78	IPE.08316	0	5.267	-44.133	1000	determined by crew using onboard GPS	WGS84	3273		Imaged at 10x magnification, broken open, imaged again on SEM	250-300	KC_2-3_002	Globorotalia tumida
IP.308631	KC78	IPE.08316	0	5.267	-44.133	1000	determined by crew using onboard GPS	WGS84	3273		Imaged at 10x magnification, broken open, imaged again on SEM	250-300	KC_2-3_020	Globigerinoides sacculifer
IP.308632	KC78	IPE.08316	0	5.267	-44.133	1000	determined by crew using onboard GPS	WGS84	3273		Imaged at 10x magnification, broken open, imaged again on SEM	250-300	KC_2-3_021	Globigerinoides sacculifer
IP.308633	KC78	IPE.08316	0	5.267	-44.133	1000	determined by crew using onboard GPS	WGS84	3273		Imaged at 10x magnification, broken open, imaged again on SEM	250-300	KC_2-3_022	Globigerinoides sacculifer
IP.308634	KC78	IPE.08316	0	5.267	-44.133	1000	determined by crew using onboard GPS	WGS84	3273		Imaged at 10x magnification, broken open, imaged again on SEM	250-300	KC_2-3_023	Globigerinella siphonifera
IP.308635	KC78	IPE.08316	0	5.267	-44.133	1000	determined by crew using onboard GPS	WGS84	3273		Imaged at 10x magnification, broken open, imaged again on SEM	250-300	KC_2-3_024	Globigerinoides sacculifer
IP.308636	KC78	IPE.08316	0	5.267	-44.133	1000	determined by crew using onboard GPS	WGS84	3273		Imaged at 10x magnification, broken open, imaged again on SEM	250-300	KC_2-3_025	Globigerinoides sacculifer
IP.308637	KC78	IPE.08316	0	5.267	-44.133	1000	determined by crew using onboard GPS	WGS84	3273		Imaged at 10x magnification, broken open, imaged again on SEM	250-300	KC_2-3_026	Globigerinoides sacculifer
IP.308638	KC78	IPE.08316	0	5.267	-44.133	1000	determined by crew using onboard GPS	WGS84	3273		Imaged at 10x magnification, broken open, imaged again on SEM	250-300	KC_2-3_027	Globigerinoides ruber
IP.308639	KC78	IPE.08316	0	5.267	-44.133	1000	determined by crew using onboard GPS	WGS84	3273		Imaged at 10x magnification, broken open, imaged again on SEM	250-300	KC_2-3_028	Globigerinoides sacculifer
IP.308640	KC78	IPE.08316	0	5.267	-44.133	1000	determined by crew using onboard GPS	WGS84	3273		Imaged at 10x magnification, broken open, imaged again on SEM	250-300	KC_2-3_029	Globigerinoides ruber
IP.308641	KC78	IPE.08316	0	5.267	-44.133	1000	determined by crew using onboard GPS	WGS84	3273		Imaged at 10x magnification, broken open, imaged again on SEM	250-300	KC_2-3_003	Globigerinoides sacculifer
IP.308642	KC78	IPE.08316	0	5.267	-44.133	1000	determined by crew using onboard GPS	WGS84	3273		Imaged at 10x magnification, broken open, imaged again on SEM	250-300	KC_2-3_030	Globigerinoides ruber
IP.308643	KC78	IPE.08316	0	5.267	-44.133	1000	determined by crew using onboard GPS	WGS84	3273		Imaged at 10x magnification, broken open, imaged again on SEM	250-300	KC_2-3_031	Globigerinoides sacculifer
IP.308644	KC78	IPE.08316	0	5.267	-44.133	1000	determined by crew using onboard GPS	WGS84	3273		Imaged at 10x magnification, broken open, imaged again on SEM	250-300	KC_2-3_032	Globigerinoides sacculifer
IP.308645	KC78	IPE.08316	0	5.267	-44.133	1000	determined by crew using onboard GPS	WGS84	3273		Imaged at 10x magnification, broken open, imaged again on SEM	250-300	KC_2-3_033	Globigerinoides sacculifer
IP.308646	KC78	IPE.08316	0	5.267	-44.133	1000	determined by crew using onboard GPS	WGS84	3273		Imaged at 10x magnification, broken open, imaged again on SEM	250-300	KC_2-3_034	Globigerinoides sacculifer
IP.308647	KC78	IPE.08316	0	5.267	-44.133	1000	determined by crew using onboard GPS	WGS84	3273		Imaged at 10x magnification, broken open, imaged again on SEM	250-300	KC_2-3_035	Globigerinoides sacculifer
IP.308648	KC78	IPE.08316	0	5.267	-44.133	1000	determined by crew using onboard GPS	WGS84	3273		Imaged at 10x magnification, broken open, imaged again on SEM	250-300	KC_2-3_036	Globigerinella siphonifera
IP.308649	KC78	IPE.08316	0	5.267	-44.133	1000	determined by crew using onboard GPS	WGS84	3273		Imaged at 10x magnification, broken open, imaged again on SEM	250-300	KC_2-3_037	Globigerinoides sacculifer
IP.308650	KC78	IPE.08316	0	5.267	-44.133	1000	determined by crew using onboard GPS	WGS84	3273		Imaged at 10x magnification, broken open, imaged again on SEM	250-300	KC_2-3_038	Globigerinoides ruber
IP.308651	KC78	IPE.08316	0	5.267	-44.133	1000	determined by crew using onboard GPS	WGS84	3273		Imaged at 10x magnification, broken open, imaged again on SEM	250-300	KC_2-3_039	Unknown
IP.308652	KC78	IPE.08316	0	5.267	-44.133	1000	determined by crew using onboard GPS	WGS84	3273		Imaged at 10x magnification, broken open, imaged again on SEM	250-300	KC_2-3_004	Globigerinoides ruber
IP.308653	KC78	IPE.08316	0	5.267	-44.133	1000	determined by crew using onboard GPS	WGS84	3273		Imaged at 10x magnification, broken open, imaged again on SEM	250-300	KC_2-3_040	Unknown
IP.308654	KC78	IPE.08316	0	5.267	-44.133	1000	determined by crew using onboard GPS	WGS84	3273		Imaged at 10x magnification, broken open, imaged again on SEM	250-300	KC_2-3_041	Unknown
IP.308655	KC78	IPE.08316	0	5.267	-44.133	1000	determined by crew using onboard GPS	WGS84	3273		Imaged at 10x magnification, broken open, imaged again on SEM	250-300	KC_2-3_042	Globigerinoides ruber
IP.308656	KC78	IPE.08316	0	5.267	-44.133	1000	determined by crew using onboard GPS	WGS84	3273		Imaged at 10x magnification, broken open, imaged again on SEM	250-300	KC_2-3_043	Globigerinoides ruber
IP.308657	KC78	IPE.08316	0	5.267	-44.133	1000	determined by crew using onboard GPS	WGS84	3273		Imaged at 10x magnification, broken open, imaged again on SEM	250-300	KC_2-3_044	Globigerinoides ruber
IP.308658	KC78	IPE.08316	0	5.267	-44.133	1000	determined by crew using onboard GPS	WGS84	3273		Imaged at 10x magnification, broken open, imaged again on SEM	250-300	KC_2-3_045	Globigerinoides ruber
IP.308659	KC78	IPE.08316	0	5.267	-44.133	1000	determined by crew using onboard GPS	WGS84	3273		Imaged at 10x magnification, broken open, imaged again on SEM	250-300	KC_2-3_046	Globigerinoides sacculifer
IP.308660	KC78	IPE.08316	0	5.267	-44.133	1000	determined by crew using onboard GPS	WGS84	3273		Imaged at 10x magnification, broken open, imaged again on SEM	250-300	KC_2-3_047	Globigerinoides sacculifer
IP.308661	KC78	IPE.08316	0	5.267	-44.133	1000	determined by crew using onboard GPS	WGS84	3273		Imaged at 10x magnification, broken open, imaged again on SEM	250-300	KC_2-3_048	Globigerinoides sacculifer
IP.308662	KC78	IPE.08316	0	5.267	-44.133	1000	determined by crew using onboard GPS	WGS84	3273		Imaged at 10x magnification, broken open, imaged again on SEM	250-300	KC_2-3_049	Globigerinoides sacculifer
IP.308663	KC78	IPE.08316	0	5.267	-44.133	1000	determined by crew using onboard GPS	WGS84	3273		Imaged at 10x magnification, broken open, imaged again on SEM	250-300	KC_2-3_005	Globigerinoides ruber
IP.308664	KC78	IPE.08316	0	5.267	-44.133	1000	determined by crew using onboard GPS	WGS84	3273		Imaged at 10x magnification, broken open, imaged again on SEM	250-300	KC_2-3_050	Globigerinoides ruber
IP.308665	KC78	IPE.08316	0	5.267	-44.133	1000	determined by crew using onboard GPS	WGS84	3273		Imaged at 10x magnification, broken open, imaged again on SEM	250-300	KC2-3_051	Globigerinoides ruber
IP.308666	KC78	IPE.08316	0	5.267	-44.133	1000	determined by crew using onboard GPS	WGS84	3273		Imaged at 10x magnification, broken open, imaged again on SEM	250-300	KC2-3_052	Globigerinoides ruber
IP.308667	KC78	IPE.08316	0	5.267	-44.133	1000	determined by crew using onboard GPS	WGS84	3273		Imaged at 10x magnification, broken open, imaged again on SEM	250-300	KC2-3_053	Globorotalia menardii
IP.308668	KC78	IPE.08316	0	5.267	-44.133	1000	determined by crew using onboard GPS	WGS84	3273		Imaged at 10x magnification, broken open, imaged again on SEM	250-300	KC2-3_054	Globigerinoides sacculifer
IP.308669	KC78	IPE.08316	0	5.267	-44.133	1000	determined by crew using onboard GPS	WGS84	3273		Imaged at 10x magnification, broken open, imaged again on SEM	250-300	KC2-3_055	Globigerinoides sacculifer
IP.308670	KC78	IPE.08316	0	5.267	-44.133	1000	determined by crew using onboard GPS	WGS84	3273		Imaged at 10x magnification, broken open, imaged again on SEM	250-300	KC2-3_056	Globigerinoides sacculifer
IP.308671	KC78	IPE.08316	0	5.267	-44.133	1000	determined by crew using onboard GPS	WGS84	3273		Imaged at 10x magnification, broken open, imaged again on SEM	250-300	KC2-3_057	Globigerinoides ruber
IP.308672	KC78	IPE.08316	0	5.267	-44.133	1000	determined by crew using onboard GPS	WGS84	3273		Imaged at 10x magnification, broken open, imaged again on SEM	250-300	KC2-3_058	Globigerinoides ruber
IP.308673	KC78	IPE.08316	0	5.267	-44.133	1000	determined by crew using onboard GPS	WGS84	3273		Imaged at 10x magnification, broken open, imaged again on SEM	250-300	KC2-3_059	Globigerinoides sacculifer
IP.308674	KC78	IPE.08316	0	5.267	-44.133	1000	determined by crew using onboard GPS	WGS84	3273		Imaged at 10x magnification, broken open, imaged again on SEM	250-300	KC_2-3_006	Globigerinoides sacculifer
IP.308675	KC78	IPE.08316	0	5.267	-44.133	1000	determined by crew using onboard GPS	WGS84	3273		Imaged at 10x magnification, broken open, imaged again on SEM	250-300	KC2-3_060	Unknown
IP.308676	KC78	IPE.08316	0	5.267	-44.133	1000	determined by crew using onboard GPS	WGS84	3273		Imaged at 10x magnification, broken open, imaged again on SEM	250-300	KC2-3_061	Globigerinoides sacculifer
IP.308677	KC78	IPE.08316	0	5.267	-44.133	1000	determined by crew using onboard GPS	WGS84	3273		Imaged at 10x magnification, broken open, imaged again on SEM	250-300	KC2-3_062	Globigerinoides sacculifer
IP.308678	KC78	IPE.08316	0	5.267	-44.133	1000	determined by crew using onboard GPS	WGS84	3273		Imaged at 10x magnification, broken open, imaged again on SEM	250-300	KC2-3_063	Globigerinoides sacculifer
IP.308679	KC78	IPE.08316	0	5.267	-44.133	1000	determined by crew using onboard GPS	WGS84	3273		Imaged at 10x magnification, broken open, imaged again on SEM	250-300	KC2-3_064	Globigerinoides sacculifer
IP.308680	KC78	IPE.08316	0	5.267	-44.133	1000	determined by crew using onboard GPS	WGS84	3273		Imaged at 10x magnification, broken open, imaged again on SEM	250-300	KC2-3_065	Globigerinoides sacculifer
IP.308681	KC78	IPE.08316	0	5.267	-44.133	1000	determined by crew using onboard GPS	WGS84	3273		Imaged at 10x magnification, broken open, imaged again on SEM	250-300	KC2-3_066	Globigerinoides ruber
IP.308682	KC78	IPE.08316	0	5.267	-44.133	1000	determined by crew using onboard GPS	WGS84	3273		Imaged at 10x magnification, broken open, imaged again on SEM	250-300	KC2-3_067	Globigerinella siphonifera
IP.308683	KC78	IPE.08316	0	5.267	-44.133	1000	determined by crew using onboard GPS	WGS84	3273		Imaged at 10x magnification, broken open, imaged again on SEM	250-300	KC2-3_068	Unknown
IP.308684	KC78	IPE.08316	0	5.267	-44.133	1000	determined by crew using onboard GPS	WGS84	3273		Imaged at 10x magnification, broken open, imaged again on SEM	250-300	KC2-3_069	Globigerinoides sacculifer
IP.308685	KC78	IPE.08316	0	5.267	-44.133	1000	determined by crew using onboard GPS	WGS84	3273		Imaged at 10x magnification, broken open, imaged again on SEM	250-300	KC_2-3_007	Globigerinoides sacculifer
IP.308686	KC78	IPE.08316	0	5.267	-44.133	1000	determined by crew using onboard GPS	WGS84	3273		Imaged at 10x magnification, broken open, imaged again on SEM	250-300	KC2-3_070	Globigerinoides ruber
IP.308687	KC78	IPE.08316	0	5.267	-44.133	1000	determined by crew using onboard GPS	WGS84	3273		Imaged at 10x magnification, broken open, imaged again on SEM	250-300	KC2-3_071	Orbulina universa
IP.308688	KC78	IPE.08316	0	5.267	-44.133	1000	determined by crew using onboard GPS	WGS84	3273		Imaged at 10x magnification, broken open, imaged again on SEM	250-300	KC2-3_072	Globigerinoides ruber
IP.308689	KC78	IPE.08316	0	5.267	-44.133	1000	determined by crew using onboard GPS	WGS84	3273		Imaged at 10x magnification, broken open, imaged again on SEM	250-300	KC2-3_073	Unknown
IP.308690	KC78	IPE.08316	0	5.267	-44.133	1000	determined by crew using onboard GPS	WGS84	3273		Imaged at 10x magnification, broken open, imaged again on SEM	250-300	KC2-3_074	Globigerinoides sacculifer
IP.308691	KC78	IPE.08316	0	5.267	-44.133	1000	determined by crew using onboard GPS	WGS84	3273		Imaged at 10x magnification, broken open, imaged again on SEM	250-300	KC2-3_075	Globigerinoides sacculifer
IP.308692	KC78	IPE.08316	0	5.267	-44.133	1000	determined by crew using onboard GPS	WGS84	3273		Imaged at 10x magnification, broken open, imaged again on SEM	250-300	KC2-3_076	Globigerinoides ruber
IP.308693	KC78	IPE.08316	0	5.267	-44.133	1000	determined by crew using onboard GPS	WGS84	3273		Imaged at 10x magnification, broken open, imaged again on SEM	250-300	KC2-3_077	Globigerinoides sacculifer
IP.308694	KC78	IPE.08316	0	5.267	-44.133	1000	determined by crew using onboard GPS	WGS84	3273		Imaged at 10x magnification, broken open, imaged again on SEM	250-300	KC2-3_078	Globigerinoides sacculifer
IP.308695	KC78	IPE.08316	0	5.267	-44.133	1000	determined by crew using onboard GPS	WGS84	3273		Imaged at 10x magnification, broken open, imaged again on SEM	250-300	KC_2-3_079	Globigerinoides ruber
IP.308696	KC78	IPE.08316	0	5.267	-44.133	1000	determined by crew using onboard GPS	WGS84	3273		Imaged at 10x magnification, broken open, imaged again on SEM	250-300	KC_2-3_008	Globigerinoides sacculifer
IP.308697	KC78	IPE.08316	0	5.267	-44.133	1000	determined by crew using onboard GPS	WGS84	3273		Imaged at 10x magnification, broken open, imaged again on SEM	250-300	KC_2-3_080	Globigerinoides ruber
IP.308698	KC78	IPE.08316	0	5.267	-44.133	1000	determined by crew using onboard GPS	WGS84	3273		Imaged at 10x magnification, broken open, imaged again on SEM	250-300	KC_2-3_081	Globigerinoides ruber
IP.308699	KC78	IPE.08316	0	5.267	-44.133	1000	determined by crew using onboard GPS	WGS84	3273		Imaged at 10x magnification, broken open, imaged again on SEM	250-300	KC_2-3_082	Unknown
IP.308700	KC78	IPE.08316	0	5.267	-44.133	1000	determined by crew using onboard GPS	WGS84	3273		Imaged at 10x magnification, broken open, imaged again on SEM	250-300	KC_2-3_083	Globigerinoides sacculifer
IP.308701	KC78	IPE.08316	0	5.267	-44.133	1000	determined by crew using onboard GPS	WGS84	3273		Imaged at 10x magnification, broken open, imaged again on SEM	250-300	KC_2-3_084	Globigerinoides ruber
IP.308702	KC78	IPE.08316	0	5.267	-44.133	1000	determined by crew using onboard GPS	WGS84	3273		Imaged at 10x magnification, broken open, imaged again on SEM	250-300	KC_2-3_085	Globigerinoides sacculifer
IP.308703	KC78	IPE.08316	0	5.267	-44.133	1000	determined by crew using onboard GPS	WGS84	3273		Imaged at 10x magnification, broken open, imaged again on SEM	250-300	KC_2-3_086	Globigerinoides sacculifer
IP.308704	KC78	IPE.08316	0	5.267	-44.133	1000	determined by crew using onboard GPS	WGS84	3273		Imaged at 10x magnification, broken open, imaged again on SEM	250-300	KC_2-3_087	Globigerinoides sacculifer
IP.308705	KC78	IPE.08316	0	5.267	-44.133	1000	determined by crew using onboard GPS	WGS84	3273		Imaged at 10x magnification, broken open, imaged again on SEM	250-300	KC_2-3_088	Globigerinoides ruber
IP.308706	KC78	IPE.08316	0	5.267	-44.133	1000	determined by crew using onboard GPS	WGS84	3273		Imaged at 10x magnification, broken open, imaged again on SEM	250-300	KC_2-3_089	Globigerinoides sacculifer
IP.308707	KC78	IPE.08316	0	5.267	-44.133	1000	determined by crew using onboard GPS	WGS84	3273		Imaged at 10x magnification, broken open, imaged again on SEM	250-300	KC_2-3_009	Globigerinoides sacculifer
IP.308708	KC78	IPE.08316	0	5.267	-44.133	1000	determined by crew using onboard GPS	WGS84	3273		Imaged at 10x magnification, broken open, imaged again on SEM	300-425	KC_3-4_001	Globigerinoides sacculifer
IP.308709	KC78	IPE.08316	0	5.267	-44.133	1000	determined by crew using onboard GPS	WGS84	3273		Imaged at 10x magnification, broken open, imaged again on SEM	300-425	KC_3-4_010	Globigerinoides ruber
IP.308710	KC78	IPE.08316	0	5.267	-44.133	1000	determined by crew using onboard GPS	WGS84	3273		Imaged at 10x magnification, broken open, imaged again on SEM	300-425	KC_3-4_100	Globigerinoides ruber
IP.308711	KC78	IPE.08316	0	5.267	-44.133	1000	determined by crew using onboard GPS	WGS84	3273		Imaged at 10x magnification, broken open, imaged again on SEM	300-425	KC_3-4_101	Globigerinoides sacculifer
IP.308712	KC78	IPE.08316	0	5.267	-44.133	1000	determined by crew using onboard GPS	WGS84	3273		Imaged at 10x magnification, broken open, imaged again on SEM	300-425	KC_3-4_102	Globigerinoides sacculifer
IP.308713	KC78	IPE.08316	0	5.267	-44.133	1000	determined by crew using onboard GPS	WGS84	3273		Imaged at 10x magnification, broken open, imaged again on SEM	300-425	KC_3-4_103	Globigerinoides sacculifer
IP.308714	KC78	IPE.08316	0	5.267	-44.133	1000	determined by crew using onboard GPS	WGS84	3273		Imaged at 10x magnification, broken open, imaged again on SEM	300-425	KC_3-4_104	Globigerinoides ruber
IP.308715	KC78	IPE.08316	0	5.267	-44.133	1000	determined by crew using onboard GPS	WGS84	3273		Imaged at 10x magnification, broken open, imaged again on SEM	300-425	KC_3-4_105	Globigerinoides sacculifer
IP.308716	KC78	IPE.08316	0	5.267	-44.133	1000	determined by crew using onboard GPS	WGS84	3273		Imaged at 10x magnification, broken open, imaged again on SEM	300-425	KC_3-4_106	Globigerinella siphonifera
IP.308717	KC78	IPE.08316	0	5.267	-44.133	1000	determined by crew using onboard GPS	WGS84	3273		Imaged at 10x magnification, broken open, imaged again on SEM	300-425	KC_3-4_107	Globigerinoides sacculifer
IP.308718	KC78	IPE.08316	0	5.267	-44.133	1000	determined by crew using onboard GPS	WGS84	3273		Imaged at 10x magnification, broken open, imaged again on SEM	300-425	KC_3-4_108	Globigerinoides sacculifer
IP.308719	KC78	IPE.08316	0	5.267	-44.133	1000	determined by crew using onboard GPS	WGS84	3273		Imaged at 10x magnification, broken open, imaged again on SEM	300-425	KC_3-4_109	Globigerinoides ruber
IP.308720	KC78	IPE.08316	0	5.267	-44.133	1000	determined by crew using onboard GPS	WGS84	3273		Imaged at 10x magnification, broken open, imaged again on SEM	300-425	KC_3-4_011	Neogloboquadrina dutertrei
IP.308721	KC78	IPE.08316	0	5.267	-44.133	1000	determined by crew using onboard GPS	WGS84	3273		Imaged at 10x magnification, broken open, imaged again on SEM	300-425	KC_3-4_110	Globigerinoides ruber
IP.308722	KC78	IPE.08316	0	5.267	-44.133	1000	determined by crew using onboard GPS	WGS84	3273		Imaged at 10x magnification, broken open, imaged again on SEM	300-425	KC_3-4_111	Globigerinoides sacculifer
IP.308723	KC78	IPE.08316	0	5.267	-44.133	1000	determined by crew using onboard GPS	WGS84	3273		Imaged at 10x magnification, broken open, imaged again on SEM	300-425	KC_3-4_112	Globorotalia tumida
IP.308724	KC78	IPE.08316	0	5.267	-44.133	1000	determined by crew using onboard GPS	WGS84	3273		Imaged at 10x magnification, broken open, imaged again on SEM	300-425	KC_3-4_113	Globigerinoides sacculifer
IP.308725	KC78	IPE.08316	0	5.267	-44.133	1000	determined by crew using onboard GPS	WGS84	3273		Imaged at 10x magnification, broken open, imaged again on SEM	300-425	KC_3-4_114	Globigerinoides sacculifer
IP.308726	KC78	IPE.08316	0	5.267	-44.133	1000	determined by crew using onboard GPS	WGS84	3273		Imaged at 10x magnification, broken open, imaged again on SEM	300-425	KC_3-4_115	Globigerinoides sacculifer
IP.308727	KC78	IPE.08316	0	5.267	-44.133	1000	determined by crew using onboard GPS	WGS84	3273		Imaged at 10x magnification, broken open, imaged again on SEM	300-425	KC_3-4_116	Globigerinoides sacculifer
IP.308728	KC78	IPE.08316	0	5.267	-44.133	1000	determined by crew using onboard GPS	WGS84	3273		Imaged at 10x magnification, broken open, imaged again on SEM	300-425	KC_3-4_117	Globigerinoides ruber
IP.308729	KC78	IPE.08316	0	5.267	-44.133	1000	determined by crew using onboard GPS	WGS84	3273		Imaged at 10x magnification, broken open, imaged again on SEM	300-425	KC_3-4_118	Globigerinoides ruber
IP.308730	KC78	IPE.08316	0	5.267	-44.133	1000	determined by crew using onboard GPS	WGS84	3273		Imaged at 10x magnification, broken open, imaged again on SEM	300-425	KC_3-4_119	Globigerinoides sacculifer
IP.308731	KC78	IPE.08316	0	5.267	-44.133	1000	determined by crew using onboard GPS	WGS84	3273		Imaged at 10x magnification, broken open, imaged again on SEM	300-425	KC_3-4_012	Globigerinoides sacculifer
IP.308732	KC78	IPE.08316	0	5.267	-44.133	1000	determined by crew using onboard GPS	WGS84	3273		Imaged at 10x magnification, broken open, imaged again on SEM	300-425	KC_3-4_012-2	Neogloboquadrina dutertrei
IP.308733	KC78	IPE.08316	0	5.267	-44.133	1000	determined by crew using onboard GPS	WGS84	3273		Imaged at 10x magnification, broken open, imaged again on SEM	300-425	KC_3-4_120	Globigerinella siphonifera
IP.308734	KC78	IPE.08316	0	5.267	-44.133	1000	determined by crew using onboard GPS	WGS84	3273		Imaged at 10x magnification, broken open, imaged again on SEM	300-425	KC_3-4_121	Globigerinoides ruber
IP.308735	KC78	IPE.08316	0	5.267	-44.133	1000	determined by crew using onboard GPS	WGS84	3273		Imaged at 10x magnification, broken open, imaged again on SEM	300-425	KC_3-4_122	Globigerinoides ruber
IP.308736	KC78	IPE.08316	0	5.267	-44.133	1000	determined by crew using onboard GPS	WGS84	3273		Imaged at 10x magnification, broken open, imaged again on SEM	300-425	KC_3-4_123	Globigerinoides sacculifer
IP.308737	KC78	IPE.08316	0	5.267	-44.133	1000	determined by crew using onboard GPS	WGS84	3273		Imaged at 10x magnification, broken open, imaged again on SEM	300-425	KC_3-4_124	Globigerinoides sacculifer
IP.308738	KC78	IPE.08316	0	5.267	-44.133	1000	determined by crew using onboard GPS	WGS84	3273		Imaged at 10x magnification, broken open, imaged again on SEM	300-425	KC_3-4_125	Globigerinoides sacculifer
IP.308739	KC78	IPE.08316	0	5.267	-44.133	1000	determined by crew using onboard GPS	WGS84	3273		Imaged at 10x magnification, broken open, imaged again on SEM	300-425	KC_3-4_126	Unknown
IP.308740	KC78	IPE.08316	0	5.267	-44.133	1000	determined by crew using onboard GPS	WGS84	3273		Imaged at 10x magnification, broken open, imaged again on SEM	300-425	KC_3-4_127	Globigerinella siphonifera
IP.308741	KC78	IPE.08316	0	5.267	-44.133	1000	determined by crew using onboard GPS	WGS84	3273		Imaged at 10x magnification, broken open, imaged again on SEM	300-425	KC_3-4_128	Globigerinoides sacculifer
IP.308742	KC78	IPE.08316	0	5.267	-44.133	1000	determined by crew using onboard GPS	WGS84	3273		Imaged at 10x magnification, broken open, imaged again on SEM	300-425	KC_3-4_129	Globigerinoides sacculifer
IP.308743	KC78	IPE.08316	0	5.267	-44.133	1000	determined by crew using onboard GPS	WGS84	3273		Imaged at 10x magnification, broken open, imaged again on SEM	300-425	KC_3-4_013	Globorotalia menardii
IP.308744	KC78	IPE.08316	0	5.267	-44.133	1000	determined by crew using onboard GPS	WGS84	3273		Imaged at 10x magnification, broken open, imaged again on SEM	300-425	KC_3-4_130	Globigerinella siphonifera
IP.308745	KC78	IPE.08316	0	5.267	-44.133	1000	determined by crew using onboard GPS	WGS84	3273		Imaged at 10x magnification, broken open, imaged again on SEM	300-425	KC_3-4_131	Globigerinoides sacculifer
IP.308746	KC78	IPE.08316	0	5.267	-44.133	1000	determined by crew using onboard GPS	WGS84	3273		Imaged at 10x magnification, broken open, imaged again on SEM	300-425	KC_3-4_132	Globorotalia menardii
IP.308747	KC78	IPE.08316	0	5.267	-44.133	1000	determined by crew using onboard GPS	WGS84	3273		Imaged at 10x magnification, broken open, imaged again on SEM	300-425	KC_3-4_133	Neogloboquadrina dutertrei
IP.308748	KC78	IPE.08316	0	5.267	-44.133	1000	determined by crew using onboard GPS	WGS84	3273		Imaged at 10x magnification, broken open, imaged again on SEM	300-425	KC_3-4_134	Unknown
IP.308749	KC78	IPE.08316	0	5.267	-44.133	1000	determined by crew using onboard GPS	WGS84	3273		Imaged at 10x magnification, broken open, imaged again on SEM	300-425	KC_3-4_135	Globigerinoides ruber
IP.308750	KC78	IPE.08316	0	5.267	-44.133	1000	determined by crew using onboard GPS	WGS84	3273		Imaged at 10x magnification, broken open, imaged again on SEM	300-425	KC_3-4_136	Pulleniatina obliquiloculata
IP.308751	KC78	IPE.08316	0	5.267	-44.133	1000	determined by crew using onboard GPS	WGS84	3273		Imaged at 10x magnification, broken open, imaged again on SEM	300-425	KC_3-4_137	Globigerinoides sacculifer
IP.308752	KC78	IPE.08316	0	5.267	-44.133	1000	determined by crew using onboard GPS	WGS84	3273		Imaged at 10x magnification, broken open, imaged again on SEM	300-425	KC_3-4_138	Unknown
IP.308753	KC78	IPE.08316	0	5.267	-44.133	1000	determined by crew using onboard GPS	WGS84	3273		Imaged at 10x magnification, broken open, imaged again on SEM	300-425	KC_3-4_139	Globigerinoides ruber
IP.308754	KC78	IPE.08316	0	5.267	-44.133	1000	determined by crew using onboard GPS	WGS84	3273		Imaged at 10x magnification, broken open, imaged again on SEM	300-425	KC_3-4_014	Unknown
IP.308755	KC78	IPE.08316	0	5.267	-44.133	1000	determined by crew using onboard GPS	WGS84	3273		Imaged at 10x magnification, broken open, imaged again on SEM	300-425	KC_3-4_014-2	Pulleniatina obliquiloculata
IP.308756	KC78	IPE.08316	0	5.267	-44.133	1000	determined by crew using onboard GPS	WGS84	3273		Imaged at 10x magnification, broken open, imaged again on SEM	300-425	KC_3-4_140	Globigerinoides ruber
IP.308757	KC78	IPE.08316	0	5.267	-44.133	1000	determined by crew using onboard GPS	WGS84	3273		Imaged at 10x magnification, broken open, imaged again on SEM	300-425	KC_3-4_141	Globigerinoides ruber
IP.308758	KC78	IPE.08316	0	5.267	-44.133	1000	determined by crew using onboard GPS	WGS84	3273		Imaged at 10x magnification, broken open, imaged again on SEM	300-425	KC_3-4_142	Globigerinoides ruber
IP.308759	KC78	IPE.08316	0	5.267	-44.133	1000	determined by crew using onboard GPS	WGS84	3273		Imaged at 10x magnification, broken open, imaged again on SEM	300-425	KC_3-4_143	Globigerinoides ruber
IP.308760	KC78	IPE.08316	0	5.267	-44.133	1000	determined by crew using onboard GPS	WGS84	3273		Imaged at 10x magnification, broken open, imaged again on SEM	300-425	KC_3-4_144	Globigerinoides sacculifer
IP.308761	KC78	IPE.08316	0	5.267	-44.133	1000	determined by crew using onboard GPS	WGS84	3273		Imaged at 10x magnification, broken open, imaged again on SEM	300-425	KC_3-4_015	Globorotalia menardii
IP.308762	KC78	IPE.08316	0	5.267	-44.133	1000	determined by crew using onboard GPS	WGS84	3273		Imaged at 10x magnification, broken open, imaged again on SEM	300-425	KC_3-4_016	Globorotalia menardii
IP.308763	KC78	IPE.08316	0	5.267	-44.133	1000	determined by crew using onboard GPS	WGS84	3273		Imaged at 10x magnification, broken open, imaged again on SEM	300-425	KC_3-4_016-2	Pulleniatina obliquiloculata
IP.308764	KC78	IPE.08316	0	5.267	-44.133	1000	determined by crew using onboard GPS	WGS84	3273		Imaged at 10x magnification, broken open, imaged again on SEM	300-425	KC_3-4_017	Globigerinoides sacculifer
IP.308765	KC78	IPE.08316	0	5.267	-44.133	1000	determined by crew using onboard GPS	WGS84	3273		Imaged at 10x magnification, broken open, imaged again on SEM	300-425	KC_3-4_017-2	Pulleniatina obliquiloculata
IP.308766	KC78	IPE.08316	0	5.267	-44.133	1000	determined by crew using onboard GPS	WGS84	3273		Imaged at 10x magnification, broken open, imaged again on SEM	300-425	KC_3-4_018	Globigerinoides sacculifer
IP.308767	KC78	IPE.08316	0	5.267	-44.133	1000	determined by crew using onboard GPS	WGS84	3273		Imaged at 10x magnification, broken open, imaged again on SEM	300-425	KC_3-4_019	Globigerinoides ruber
IP.308768	KC78	IPE.08316	0	5.267	-44.133	1000	determined by crew using onboard GPS	WGS84	3273		Imaged at 10x magnification, broken open, imaged again on SEM	300-425	KC_3-4_019-2	Pulleniatina obliquiloculata
IP.308769	KC78	IPE.08316	0	5.267	-44.133	1000	determined by crew using onboard GPS	WGS84	3273		Imaged at 10x magnification, broken open, imaged again on SEM	300-425	KC_3-4_002	Globigerinoides sacculifer
IP.308770	KC78	IPE.08316	0	5.267	-44.133	1000	determined by crew using onboard GPS	WGS84	3273		Imaged at 10x magnification, broken open, imaged again on SEM	300-425	KC_3-4_020	Globigerinoides sacculifer
IP.308771	KC78	IPE.08316	0	5.267	-44.133	1000	determined by crew using onboard GPS	WGS84	3273		Imaged at 10x magnification, broken open, imaged again on SEM	300-425	KC_3-4_021	Pulleniatina obliquiloculata
IP.308772	KC78	IPE.08316	0	5.267	-44.133	1000	determined by crew using onboard GPS	WGS84	3273		Imaged at 10x magnification, broken open, imaged again on SEM	300-425	KC_3-4_022	Neogloboquadrina dutertrei
IP.308773	KC78	IPE.08316	0	5.267	-44.133	1000	determined by crew using onboard GPS	WGS84	3273		Imaged at 10x magnification, broken open, imaged again on SEM	300-425	KC_3-4_022-2	Pulleniatina obliquiloculata
IP.308774	KC78	IPE.08316	0	5.267	-44.133	1000	determined by crew using onboard GPS	WGS84	3273		Imaged at 10x magnification, broken open, imaged again on SEM	300-425	KC_3-4_023	Globigerinoides sacculifer
IP.308775	KC78	IPE.08316	0	5.267	-44.133	1000	determined by crew using onboard GPS	WGS84	3273		Imaged at 10x magnification, broken open, imaged again on SEM	300-425	KC_3-4_024	Globigerinoides sacculifer
IP.308776	KC78	IPE.08316	0	5.267	-44.133	1000	determined by crew using onboard GPS	WGS84	3273		Imaged at 10x magnification, broken open, imaged again on SEM	300-425	KC_3-4_025	Globigerinoides ruber
IP.308777	KC78	IPE.08316	0	5.267	-44.133	1000	determined by crew using onboard GPS	WGS84	3273		Imaged at 10x magnification, broken open, imaged again on SEM	300-425	KC_3-4_026	Globigerinoides sacculifer
IP.308778	KC78	IPE.08316	0	5.267	-44.133	1000	determined by crew using onboard GPS	WGS84	3273		Imaged at 10x magnification, broken open, imaged again on SEM	300-425	KC_3-4_027	Globigerinoides sacculifer
IP.308779	KC78	IPE.08316	0	5.267	-44.133	1000	determined by crew using onboard GPS	WGS84	3273		Imaged at 10x magnification, broken open, imaged again on SEM	300-425	KC_3-4_027-2	Orbulina universa
IP.308780	KC78	IPE.08316	0	5.267	-44.133	1000	determined by crew using onboard GPS	WGS84	3273		Imaged at 10x magnification, broken open, imaged again on SEM	300-425	KC_3-4_028	Globigerinoides sacculifer
IP.308781	KC78	IPE.08316	0	5.267	-44.133	1000	determined by crew using onboard GPS	WGS84	3273		Imaged at 10x magnification, broken open, imaged again on SEM	300-425	KC_3-4_029	Globorotalia menardii
IP.308782	KC78	IPE.08316	0	5.267	-44.133	1000	determined by crew using onboard GPS	WGS84	3273		Imaged at 10x magnification, broken open, imaged again on SEM	300-425	KC_3-4_003	Globigerinoides sacculifer
IP.308783	KC78	IPE.08316	0	5.267	-44.133	1000	determined by crew using onboard GPS	WGS84	3273		Imaged at 10x magnification, broken open, imaged again on SEM	300-425	KC_3-4_030	Globigerinoides sacculifer
IP.308784	KC78	IPE.08316	0	5.267	-44.133	1000	determined by crew using onboard GPS	WGS84	3273		Imaged at 10x magnification, broken open, imaged again on SEM	300-425	KC_3-4_030-2	Globorotalia menardii
IP.308785	KC78	IPE.08316	0	5.267	-44.133	1000	determined by crew using onboard GPS	WGS84	3273		Imaged at 10x magnification, broken open, imaged again on SEM	300-425	KC_3-4_031	Globigerinoides ruber
IP.308786	KC78	IPE.08316	0	5.267	-44.133	1000	determined by crew using onboard GPS	WGS84	3273		Imaged at 10x magnification, broken open, imaged again on SEM	300-425	KC_3-4_032	Globigerinella siphonifera
IP.308787	KC78	IPE.08316	0	5.267	-44.133	1000	determined by crew using onboard GPS	WGS84	3273		Imaged at 10x magnification, broken open, imaged again on SEM	300-425	KC_3-4_033	Globigerinoides sacculifer
IP.308788	KC78	IPE.08316	0	5.267	-44.133	1000	determined by crew using onboard GPS	WGS84	3273		Imaged at 10x magnification, broken open, imaged again on SEM	300-425	KC_3-4_034	Globigerinoides sacculifer
IP.308789	KC78	IPE.08316	0	5.267	-44.133	1000	determined by crew using onboard GPS	WGS84	3273		Imaged at 10x magnification, broken open, imaged again on SEM	300-425	KC_3-4_034-2	Orbulina universa
IP.308790	KC78	IPE.08316	0	5.267	-44.133	1000	determined by crew using onboard GPS	WGS84	3273		Imaged at 10x magnification, broken open, imaged again on SEM	300-425	KC_3-4_035	Globigerinoides sacculifer
IP.308791	KC78	IPE.08316	0	5.267	-44.133	1000	determined by crew using onboard GPS	WGS84	3273		Imaged at 10x magnification, broken open, imaged again on SEM	300-425	KC_3-4_036	Globigerinoides sacculifer
IP.308792	KC78	IPE.08316	0	5.267	-44.133	1000	determined by crew using onboard GPS	WGS84	3273		Imaged at 10x magnification, broken open, imaged again on SEM	300-425	KC_3-4_037	Globigerinella siphonifera
IP.308793	KC78	IPE.08316	0	5.267	-44.133	1000	determined by crew using onboard GPS	WGS84	3273		Imaged at 10x magnification, broken open, imaged again on SEM	300-425	KC_3-4_038	Globigerinoides ruber
IP.308794	KC78	IPE.08316	0	5.267	-44.133	1000	determined by crew using onboard GPS	WGS84	3273		Imaged at 10x magnification, broken open, imaged again on SEM	300-425	KC_3-4_038-2	Orbulina universa
IP.308795	KC78	IPE.08316	0	5.267	-44.133	1000	determined by crew using onboard GPS	WGS84	3273		Imaged at 10x magnification, broken open, imaged again on SEM	300-425	KC_3-4_039	Globorotalia menardii
IP.308796	KC78	IPE.08316	0	5.267	-44.133	1000	determined by crew using onboard GPS	WGS84	3273		Imaged at 10x magnification, broken open, imaged again on SEM	300-425	KC_3-4_039-2	Orbulina universa
IP.308797	KC78	IPE.08316	0	5.267	-44.133	1000	determined by crew using onboard GPS	WGS84	3273		Imaged at 10x magnification, broken open, imaged again on SEM	300-425	KC_3-4_004	Unknown
IP.308798	KC78	IPE.08316	0	5.267	-44.133	1000	determined by crew using onboard GPS	WGS84	3273		Imaged at 10x magnification, broken open, imaged again on SEM	300-425	KC_3-4_040	Globigerinoides sacculifer
IP.308799	KC78	IPE.08316	0	5.267	-44.133	1000	determined by crew using onboard GPS	WGS84	3273		Imaged at 10x magnification, broken open, imaged again on SEM	300-425	KC_3-4_040-2	Globorotalia tumida
IP.308800	KC78	IPE.08316	0	5.267	-44.133	1000	determined by crew using onboard GPS	WGS84	3273		Imaged at 10x magnification, broken open, imaged again on SEM	300-425	KC_3-4_041	Neogloboquadrina dutertrei
IP.308801	KC78	IPE.08316	0	5.267	-44.133	1000	determined by crew using onboard GPS	WGS84	3273		Imaged at 10x magnification, broken open, imaged again on SEM	300-425	KC_3-4_041-2	Globorotalia tumida
IP.308802	KC78	IPE.08316	0	5.267	-44.133	1000	determined by crew using onboard GPS	WGS84	3273		Imaged at 10x magnification, broken open, imaged again on SEM	300-425	KC_3-4_042	Globigerinella siphonifera
IP.308803	KC78	IPE.08316	0	5.267	-44.133	1000	determined by crew using onboard GPS	WGS84	3273		Imaged at 10x magnification, broken open, imaged again on SEM	300-425	KC_3-4_043	Globigerinoides ruber
IP.308804	KC78	IPE.08316	0	5.267	-44.133	1000	determined by crew using onboard GPS	WGS84	3273		Imaged at 10x magnification, broken open, imaged again on SEM	300-425	KC_3-4_044	Globigerinoides ruber
IP.308805	KC78	IPE.08316	0	5.267	-44.133	1000	determined by crew using onboard GPS	WGS84	3273		Imaged at 10x magnification, broken open, imaged again on SEM	300-425	KC_3-4_045	Globigerinella siphonifera
IP.308806	KC78	IPE.08316	0	5.267	-44.133	1000	determined by crew using onboard GPS	WGS84	3273		Imaged at 10x magnification, broken open, imaged again on SEM	300-425	KC_3-4_046	Globigerinoides sacculifer
IP.308807	KC78	IPE.08316	0	5.267	-44.133	1000	determined by crew using onboard GPS	WGS84	3273		Imaged at 10x magnification, broken open, imaged again on SEM	300-425	KC_3-4_047	Globigerinoides sacculifer
IP.308808	KC78	IPE.08316	0	5.267	-44.133	1000	determined by crew using onboard GPS	WGS84	3273		Imaged at 10x magnification, broken open, imaged again on SEM	300-425	KC_3-4_048	Globigerinella siphonifera
IP.308809	KC78	IPE.08316	0	5.267	-44.133	1000	determined by crew using onboard GPS	WGS84	3273		Imaged at 10x magnification, broken open, imaged again on SEM	300-425	KC_3-4_049	Globigerinoides sacculifer
IP.308810	KC78	IPE.08316	0	5.267	-44.133	1000	determined by crew using onboard GPS	WGS84	3273		Imaged at 10x magnification, broken open, imaged again on SEM	300-425	KC_3-4_005	Globigerinoides ruber
IP.308811	KC78	IPE.08316	0	5.267	-44.133	1000	determined by crew using onboard GPS	WGS84	3273		Imaged at 10x magnification, broken open, imaged again on SEM	300-425	KC_3-4_050	Neogloboquadrina dutertrei
IP.308812	KC78	IPE.08316	0	5.267	-44.133	1000	determined by crew using onboard GPS	WGS84	3273		Imaged at 10x magnification, broken open, imaged again on SEM	300-425	KC_3-4_050-2	Globigerinella siphonifera
IP.308813	KC78	IPE.08316	0	5.267	-44.133	1000	determined by crew using onboard GPS	WGS84	3273		Imaged at 10x magnification, broken open, imaged again on SEM	300-425	KC_3-4_051	Globigerinoides ruber
IP.308814	KC78	IPE.08316	0	5.267	-44.133	1000	determined by crew using onboard GPS	WGS84	3273		Imaged at 10x magnification, broken open, imaged again on SEM	300-425	KC_3-4_052	Globigerinoides sacculifer
IP.308815	KC78	IPE.08316	0	5.267	-44.133	1000	determined by crew using onboard GPS	WGS84	3273		Imaged at 10x magnification, broken open, imaged again on SEM	300-425	KC_3-4_053	Globigerinoides sacculifer
IP.308816	KC78	IPE.08316	0	5.267	-44.133	1000	determined by crew using onboard GPS	WGS84	3273		Imaged at 10x magnification, broken open, imaged again on SEM	300-425	KC_3-4_054	Globigerinoides sacculifer
IP.308817	KC78	IPE.08316	0	5.267	-44.133	1000	determined by crew using onboard GPS	WGS84	3273		Imaged at 10x magnification, broken open, imaged again on SEM	300-425	KC_3-4_055	Globigerinoides sacculifer
IP.308818	KC78	IPE.08316	0	5.267	-44.133	1000	determined by crew using onboard GPS	WGS84	3273		Imaged at 10x magnification, broken open, imaged again on SEM	300-425	KC_3-4_056	Globigerinoides sacculifer
IP.308819	KC78	IPE.08316	0	5.267	-44.133	1000	determined by crew using onboard GPS	WGS84	3273		Imaged at 10x magnification, broken open, imaged again on SEM	300-425	KC_3-4_057	Globigerinoides sacculifer
IP.308820	KC78	IPE.08316	0	5.267	-44.133	1000	determined by crew using onboard GPS	WGS84	3273		Imaged at 10x magnification, broken open, imaged again on SEM	300-425	KC_3-4_058	Globigerinoides ruber
IP.308821	KC78	IPE.08316	0	5.267	-44.133	1000	determined by crew using onboard GPS	WGS84	3273		Imaged at 10x magnification, broken open, imaged again on SEM	300-425	KC_3-4_059	Globigerinoides sacculifer
IP.308822	KC78	IPE.08316	0	5.267	-44.133	1000	determined by crew using onboard GPS	WGS84	3273		Imaged at 10x magnification, broken open, imaged again on SEM	300-425	KC_3-4_006	Globigerinoides sacculifer
IP.308823	KC78	IPE.08316	0	5.267	-44.133	1000	determined by crew using onboard GPS	WGS84	3273		Imaged at 10x magnification, broken open, imaged again on SEM	300-425	KC_3-4_060	Globigerinoides sacculifer
IP.308824	KC78	IPE.08316	0	5.267	-44.133	1000	determined by crew using onboard GPS	WGS84	3273		Imaged at 10x magnification, broken open, imaged again on SEM	300-425	KC_3-4_061	Globorotalia menardii
IP.308825	KC78	IPE.08316	0	5.267	-44.133	1000	determined by crew using onboard GPS	WGS84	3273		Imaged at 10x magnification, broken open, imaged again on SEM	300-425	KC_3-4_062	Globigerinella siphonifera
IP.308826	KC78	IPE.08316	0	5.267	-44.133	1000	determined by crew using onboard GPS	WGS84	3273		Imaged at 10x magnification, broken open, imaged again on SEM	300-425	KC_3-4_063	Unknown
IP.308827	KC78	IPE.08316	0	5.267	-44.133	1000	determined by crew using onboard GPS	WGS84	3273		Imaged at 10x magnification, broken open, imaged again on SEM	300-425	KC_3-4_064	Globigerinoides sacculifer
IP.308828	KC78	IPE.08316	0	5.267	-44.133	1000	determined by crew using onboard GPS	WGS84	3273		Imaged at 10x magnification, broken open, imaged again on SEM	300-425	KC_3-4_065	Globigerinoides ruber
IP.308829	KC78	IPE.08316	0	5.267	-44.133	1000	determined by crew using onboard GPS	WGS84	3273		Imaged at 10x magnification, broken open, imaged again on SEM	300-425	KC_3-4_066	Globigerinoides sacculifer
IP.308830	KC78	IPE.08316	0	5.267	-44.133	1000	determined by crew using onboard GPS	WGS84	3273		Imaged at 10x magnification, broken open, imaged again on SEM	300-425	KC_3-4_067	Globigerinoides ruber
IP.308831	KC78	IPE.08316	0	5.267	-44.133	1000	determined by crew using onboard GPS	WGS84	3273		Imaged at 10x magnification, broken open, imaged again on SEM	300-425	KC_3-4_068	Globigerinoides ruber
IP.308832	KC78	IPE.08316	0	5.267	-44.133	1000	determined by crew using onboard GPS	WGS84	3273		Imaged at 10x magnification, broken open, imaged again on SEM	300-425	KC_3-4_069	Globigerinoides ruber
IP.308833	KC78	IPE.08316	0	5.267	-44.133	1000	determined by crew using onboard GPS	WGS84	3273		Imaged at 10x magnification, broken open, imaged again on SEM	300-425	KC_3-4_007	Globigerinoides ruber
IP.308834	KC78	IPE.08316	0	5.267	-44.133	1000	determined by crew using onboard GPS	WGS84	3273		Imaged at 10x magnification, broken open, imaged again on SEM	300-425	KC_3-4_070	Globigerinoides sacculifer
IP.308835	KC78	IPE.08316	0	5.267	-44.133	1000	determined by crew using onboard GPS	WGS84	3273		Imaged at 10x magnification, broken open, imaged again on SEM	300-425	KC_3-4_071	Globigerinoides ruber
IP.308836	KC78	IPE.08316	0	5.267	-44.133	1000	determined by crew using onboard GPS	WGS84	3273		Imaged at 10x magnification, broken open, imaged again on SEM	300-425	KC_3-4_072	Globigerinoides ruber
IP.308837	KC78	IPE.08316	0	5.267	-44.133	1000	determined by crew using onboard GPS	WGS84	3273		Imaged at 10x magnification, broken open, imaged again on SEM	300-425	KC_3-4_073	Globorotalia menardii
IP.308838	KC78	IPE.08316	0	5.267	-44.133	1000	determined by crew using onboard GPS	WGS84	3273		Imaged at 10x magnification, broken open, imaged again on SEM	300-425	KC_3-4_074	Globigerinoides sacculifer
IP.308839	KC78	IPE.08316	0	5.267	-44.133	1000	determined by crew using onboard GPS	WGS84	3273		Imaged at 10x magnification, broken open, imaged again on SEM	300-425	KC_3-4_075	Neogloboquadrina dutertrei
IP.308840	KC78	IPE.08316	0	5.267	-44.133	1000	determined by crew using onboard GPS	WGS84	3273		Imaged at 10x magnification, broken open, imaged again on SEM	300-425	KC_3-4_076	Globigerinoides sacculifer
IP.308841	KC78	IPE.08316	0	5.267	-44.133	1000	determined by crew using onboard GPS	WGS84	3273		Imaged at 10x magnification, broken open, imaged again on SEM	300-425	KC_3-4_077	Globigerinoides sacculifer
IP.308842	KC78	IPE.08316	0	5.267	-44.133	1000	determined by crew using onboard GPS	WGS84	3273		Imaged at 10x magnification, broken open, imaged again on SEM	300-425	KC_3-4_078	Globigerinoides sacculifer
IP.308843	KC78	IPE.08316	0	5.267	-44.133	1000	determined by crew using onboard GPS	WGS84	3273		Imaged at 10x magnification, broken open, imaged again on SEM	300-425	KC_3-4_079	Globigerinella siphonifera
IP.308844	KC78	IPE.08316	0	5.267	-44.133	1000	determined by crew using onboard GPS	WGS84	3273		Imaged at 10x magnification, broken open, imaged again on SEM	300-425	KC_3-4_008	Globigerinoides sacculifer
IP.308845	KC78	IPE.08316	0	5.267	-44.133	1000	determined by crew using onboard GPS	WGS84	3273		Imaged at 10x magnification, broken open, imaged again on SEM	300-425	KC_3-4_080	Globigerinoides sacculifer
IP.308846	KC78	IPE.08316	0	5.267	-44.133	1000	determined by crew using onboard GPS	WGS84	3273		Imaged at 10x magnification, broken open, imaged again on SEM	300-425	KC_3-4_081	Globigerinella siphonifera
IP.308847	KC78	IPE.08316	0	5.267	-44.133	1000	determined by crew using onboard GPS	WGS84	3273		Imaged at 10x magnification, broken open, imaged again on SEM	300-425	KC_3-4_082	Globigerinoides ruber
IP.308848	KC78	IPE.08316	0	5.267	-44.133	1000	determined by crew using onboard GPS	WGS84	3273		Imaged at 10x magnification, broken open, imaged again on SEM	300-425	KC_3-4_083	Globigerinoides sacculifer
IP.308849	KC78	IPE.08316	0	5.267	-44.133	1000	determined by crew using onboard GPS	WGS84	3273		Imaged at 10x magnification, broken open, imaged again on SEM	300-425	KC_3-4_084	Pulleniatina obliquiloculata
IP.308850	KC78	IPE.08316	0	5.267	-44.133	1000	determined by crew using onboard GPS	WGS84	3273		Imaged at 10x magnification, broken open, imaged again on SEM	300-425	KC_3-4_085	Globigerinoides sacculifer
IP.308851	KC78	IPE.08316	0	5.267	-44.133	1000	determined by crew using onboard GPS	WGS84	3273		Imaged at 10x magnification, broken open, imaged again on SEM	300-425	KC_3-4_086	Globigerinoides sacculifer
IP.308852	KC78	IPE.08316	0	5.267	-44.133	1000	determined by crew using onboard GPS	WGS84	3273		Imaged at 10x magnification, broken open, imaged again on SEM	300-425	KC_3-4_087	Globigerinoides sacculifer
IP.308853	KC78	IPE.08316	0	5.267	-44.133	1000	determined by crew using onboard GPS	WGS84	3273		Imaged at 10x magnification, broken open, imaged again on SEM	300-425	KC_3-4_088	Globigerinoides sacculifer
IP.308854	KC78	IPE.08316	0	5.267	-44.133	1000	determined by crew using onboard GPS	WGS84	3273		Imaged at 10x magnification, broken open, imaged again on SEM	300-425	KC_3-4_089	Globigerinoides sacculifer
IP.308855	KC78	IPE.08316	0	5.267	-44.133	1000	determined by crew using onboard GPS	WGS84	3273		Imaged at 10x magnification, broken open, imaged again on SEM	300-425	KC_3-4_009	Globigerinoides sacculifer
IP.308856	KC78	IPE.08316	0	5.267	-44.133	1000	determined by crew using onboard GPS	WGS84	3273		Imaged at 10x magnification, broken open, imaged again on SEM	300-425	KC_3-4_090	Globorotalia menardii
IP.308857	KC78	IPE.08316	0	5.267	-44.133	1000	determined by crew using onboard GPS	WGS84	3273		Imaged at 10x magnification, broken open, imaged again on SEM	300-425	KC_3-4_091	Globigerinoides sacculifer
IP.308858	KC78	IPE.08316	0	5.267	-44.133	1000	determined by crew using onboard GPS	WGS84	3273		Imaged at 10x magnification, broken open, imaged again on SEM	300-425	KC_3-4_092	Globigerinella siphonifera
IP.308859	KC78	IPE.08316	0	5.267	-44.133	1000	determined by crew using onboard GPS	WGS84	3273		Imaged at 10x magnification, broken open, imaged again on SEM	300-425	KC_3-4_093	Globigerinoides sacculifer
IP.308860	KC78	IPE.08316	0	5.267	-44.133	1000	determined by crew using onboard GPS	WGS84	3273		Imaged at 10x magnification, broken open, imaged again on SEM	300-425	KC_3-4_094	Globigerinoides sacculifer
IP.308861	KC78	IPE.08316	0	5.267	-44.133	1000	determined by crew using onboard GPS	WGS84	3273		Imaged at 10x magnification, broken open, imaged again on SEM	300-425	KC_3-4_095	Globorotalia tumida
IP.308862	KC78	IPE.08316	0	5.267	-44.133	1000	determined by crew using onboard GPS	WGS84	3273		Imaged at 10x magnification, broken open, imaged again on SEM	300-425	KC_3-4_096	Globigerinoides ruber
IP.308863	KC78	IPE.08316	0	5.267	-44.133	1000	determined by crew using onboard GPS	WGS84	3273		Imaged at 10x magnification, broken open, imaged again on SEM	300-425	KC_3-4_097	Globigerinella siphonifera
IP.308864	KC78	IPE.08316	0	5.267	-44.133	1000	determined by crew using onboard GPS	WGS84	3273		Imaged at 10x magnification, broken open, imaged again on SEM	300-425	KC_3-4_098	Pulleniatina obliquiloculata
IP.308865	KC78	IPE.08316	0	5.267	-44.133	1000	determined by crew using onboard GPS	WGS84	3273		Imaged at 10x magnification, broken open, imaged again on SEM	300-425	KC_3-4_099	Globigerinoides sacculifer
IP.308866	KC78	IPE.08316	0	5.267	-44.133	1000	determined by crew using onboard GPS	WGS84	3273		Imaged at 10x magnification, broken open, imaged again on SEM	425-600	KC_4-6_001	Globigerinoides sacculifer
IP.308867	KC78	IPE.08316	0	5.267	-44.133	1000	determined by crew using onboard GPS	WGS84	3273		Imaged at 10x magnification, broken open, imaged again on SEM	425-600	KC_4-6_010	Globigerinoides sacculifer
IP.308868	KC78	IPE.08316	0	5.267	-44.133	1000	determined by crew using onboard GPS	WGS84	3273		Imaged at 10x magnification, broken open, imaged again on SEM	425-600	KC_4-6_010-2	Sphaeroidinella dehiscens
IP.308869	KC78	IPE.08316	0	5.267	-44.133	1000	determined by crew using onboard GPS	WGS84	3273		Imaged at 10x magnification, broken open, imaged again on SEM	425-600	KC_4-6_100	Globigerinoides sacculifer
IP.308870	KC78	IPE.08316	0	5.267	-44.133	1000	determined by crew using onboard GPS	WGS84	3273		Imaged at 10x magnification, broken open, imaged again on SEM	425-600	KC_4-6_101	Globigerinoides sacculifer
IP.308871	KC78	IPE.08316	0	5.267	-44.133	1000	determined by crew using onboard GPS	WGS84	3273		Imaged at 10x magnification, broken open, imaged again on SEM	425-600	KC_4-6_102	Globigerinoides sacculifer
IP.308872	KC78	IPE.08316	0	5.267	-44.133	1000	determined by crew using onboard GPS	WGS84	3273		Imaged at 10x magnification, broken open, imaged again on SEM	425-600	KC_4-6_103	Orbulina universa
IP.308873	KC78	IPE.08316	0	5.267	-44.133	1000	determined by crew using onboard GPS	WGS84	3273		Imaged at 10x magnification, broken open, imaged again on SEM	425-600	KC_4-6_104	Globigerinoides sacculifer
IP.308874	KC78	IPE.08316	0	5.267	-44.133	1000	determined by crew using onboard GPS	WGS84	3273		Imaged at 10x magnification, broken open, imaged again on SEM	425-600	KC_4-6_105	Globigerinoides sacculifer
IP.308875	KC78	IPE.08316	0	5.267	-44.133	1000	determined by crew using onboard GPS	WGS84	3273		Imaged at 10x magnification, broken open, imaged again on SEM	425-600	KC_4-6_106	Globorotalia menardii
IP.308876	KC78	IPE.08316	0	5.267	-44.133	1000	determined by crew using onboard GPS	WGS84	3273		Imaged at 10x magnification, broken open, imaged again on SEM	425-600	KC_4-6_107	Globigerinoides sacculifer
IP.308877	KC78	IPE.08316	0	5.267	-44.133	1000	determined by crew using onboard GPS	WGS84	3273		Imaged at 10x magnification, broken open, imaged again on SEM	425-600	KC_4-6_108	Globigerinoides sacculifer
IP.308878	KC78	IPE.08316	0	5.267	-44.133	1000	determined by crew using onboard GPS	WGS84	3273		Imaged at 10x magnification, broken open, imaged again on SEM	425-600	KC_4-6_109	Globigerinoides sacculifer
IP.308879	KC78	IPE.08316	0	5.267	-44.133	1000	determined by crew using onboard GPS	WGS84	3273		Imaged at 10x magnification, broken open, imaged again on SEM	425-600	KC_4-6_011	Globigerinoides sacculifer
IP.308880	KC78	IPE.08316	0	5.267	-44.133	1000	determined by crew using onboard GPS	WGS84	3273		Imaged at 10x magnification, broken open, imaged again on SEM	425-600	KC_4-6_011-2	Sphaeroidinella dehiscens
IP.308881	KC78	IPE.08316	0	5.267	-44.133	1000	determined by crew using onboard GPS	WGS84	3273		Imaged at 10x magnification, broken open, imaged again on SEM	425-600	KC_4-6_110	Globorotalia tumida
IP.308882	KC78	IPE.08316	0	5.267	-44.133	1000	determined by crew using onboard GPS	WGS84	3273		Imaged at 10x magnification, broken open, imaged again on SEM	425-600	KC_4-6_111	Globorotalia menardii
IP.308883	KC78	IPE.08316	0	5.267	-44.133	1000	determined by crew using onboard GPS	WGS84	3273		Imaged at 10x magnification, broken open, imaged again on SEM	425-600	KC_4-6_112	Globigerinoides sacculifer
IP.308884	KC78	IPE.08316	0	5.267	-44.133	1000	determined by crew using onboard GPS	WGS84	3273		Imaged at 10x magnification, broken open, imaged again on SEM	425-600	KC_4-6_113	Globigerinoides sacculifer
IP.308885	KC78	IPE.08316	0	5.267	-44.133	1000	determined by crew using onboard GPS	WGS84	3273		Imaged at 10x magnification, broken open, imaged again on SEM	425-600	KC_4-6_114	Globorotalia menardii
IP.308886	KC78	IPE.08316	0	5.267	-44.133	1000	determined by crew using onboard GPS	WGS84	3273		Imaged at 10x magnification, broken open, imaged again on SEM	425-600	KC_4-6_115	Globigerinoides sacculifer
IP.308887	KC78	IPE.08316	0	5.267	-44.133	1000	determined by crew using onboard GPS	WGS84	3273		Imaged at 10x magnification, broken open, imaged again on SEM	425-600	KC_4-6_116	Globigerinoides sacculifer
IP.308888	KC78	IPE.08316	0	5.267	-44.133	1000	determined by crew using onboard GPS	WGS84	3273		Imaged at 10x magnification, broken open, imaged again on SEM	425-600	KC_4-6_117	Globigerinoides sacculifer
IP.308889	KC78	IPE.08316	0	5.267	-44.133	1000	determined by crew using onboard GPS	WGS84	3273		Imaged at 10x magnification, broken open, imaged again on SEM	425-600	KC_4-6_118	Globigerinoides sacculifer
IP.308890	KC78	IPE.08316	0	5.267	-44.133	1000	determined by crew using onboard GPS	WGS84	3273		Imaged at 10x magnification, broken open, imaged again on SEM	425-600	KC_4-6_119	Globigerinoides sacculifer
IP.308891	KC78	IPE.08316	0	5.267	-44.133	1000	determined by crew using onboard GPS	WGS84	3273		Imaged at 10x magnification, broken open, imaged again on SEM	425-600	KC_4-6_012	Globigerinoides sacculifer
IP.308892	KC78	IPE.08316	0	5.267	-44.133	1000	determined by crew using onboard GPS	WGS84	3273		Imaged at 10x magnification, broken open, imaged again on SEM	425-600	KC_4-6_012-2	Globigerinoides ruber
IP.308893	KC78	IPE.08316	0	5.267	-44.133	1000	determined by crew using onboard GPS	WGS84	3273		Imaged at 10x magnification, broken open, imaged again on SEM	425-600	KC_4-6_120	Globorotalia tumida
IP.308894	KC78	IPE.08316	0	5.267	-44.133	1000	determined by crew using onboard GPS	WGS84	3273		Imaged at 10x magnification, broken open, imaged again on SEM	425-600	KC_4-6_121	Globigerinoides sacculifer
IP.308895	KC78	IPE.08316	0	5.267	-44.133	1000	determined by crew using onboard GPS	WGS84	3273		Imaged at 10x magnification, broken open, imaged again on SEM	425-600	KC_4-6_122	Globigerinoides sacculifer
IP.308896	KC78	IPE.08316	0	5.267	-44.133	1000	determined by crew using onboard GPS	WGS84	3273		Imaged at 10x magnification, broken open, imaged again on SEM	425-600	KC_4-6_123	Globigerinoides sacculifer
IP.308897	KC78	IPE.08316	0	5.267	-44.133	1000	determined by crew using onboard GPS	WGS84	3273		Imaged at 10x magnification, broken open, imaged again on SEM	425-600	KC_4-6_124	Globorotalia menardii
IP.308898	KC78	IPE.08316	0	5.267	-44.133	1000	determined by crew using onboard GPS	WGS84	3273		Imaged at 10x magnification, broken open, imaged again on SEM	425-600	KC_4-6_125	Globigerinoides sacculifer
IP.308899	KC78	IPE.08316	0	5.267	-44.133	1000	determined by crew using onboard GPS	WGS84	3273		Imaged at 10x magnification, broken open, imaged again on SEM	425-600	KC_4-6_126	Globorotalia menardii
IP.308900	KC78	IPE.08316	0	5.267	-44.133	1000	determined by crew using onboard GPS	WGS84	3273		Imaged at 10x magnification, broken open, imaged again on SEM	425-600	KC_4-6_127	Globigerinoides sacculifer
IP.308901	KC78	IPE.08316	0	5.267	-44.133	1000	determined by crew using onboard GPS	WGS84	3273		Imaged at 10x magnification, broken open, imaged again on SEM	425-600	KC_4-6_128	Globorotalia menardii
IP.308902	KC78	IPE.08316	0	5.267	-44.133	1000	determined by crew using onboard GPS	WGS84	3273		Imaged at 10x magnification, broken open, imaged again on SEM	425-600	KC_4-6_129	Globorotalia menardii
IP.308903	KC78	IPE.08316	0	5.267	-44.133	1000	determined by crew using onboard GPS	WGS84	3273		Imaged at 10x magnification, broken open, imaged again on SEM	425-600	KC_4-6_013	Globigerinoides sacculifer
IP.308904	KC78	IPE.08316	0	5.267	-44.133	1000	determined by crew using onboard GPS	WGS84	3273		Imaged at 10x magnification, broken open, imaged again on SEM	425-600	KC_4-6_013-2	Globigerinoides ruber
IP.308905	KC78	IPE.08316	0	5.267	-44.133	1000	determined by crew using onboard GPS	WGS84	3273		Imaged at 10x magnification, broken open, imaged again on SEM	425-600	KC_4-6_130	Globigerinoides sacculifer
IP.308906	KC78	IPE.08316	0	5.267	-44.133	1000	determined by crew using onboard GPS	WGS84	3273		Imaged at 10x magnification, broken open, imaged again on SEM	425-600	KC_4-6_131	Globorotalia menardii
IP.308907	KC78	IPE.08316	0	5.267	-44.133	1000	determined by crew using onboard GPS	WGS84	3273		Imaged at 10x magnification, broken open, imaged again on SEM	425-600	KC_4-6_132	Globorotalia menardii
IP.308908	KC78	IPE.08316	0	5.267	-44.133	1000	determined by crew using onboard GPS	WGS84	3273		Imaged at 10x magnification, broken open, imaged again on SEM	425-600	KC_4-6_133	Globigerinoides sacculifer
IP.308909	KC78	IPE.08316	0	5.267	-44.133	1000	determined by crew using onboard GPS	WGS84	3273		Imaged at 10x magnification, broken open, imaged again on SEM	425-600	KC_4-6_134	Globorotalia menardii
IP.308910	KC78	IPE.08316	0	5.267	-44.133	1000	determined by crew using onboard GPS	WGS84	3273		Imaged at 10x magnification, broken open, imaged again on SEM	425-600	KC_4-6_135	Globigerinoides ruber
IP.308911	KC78	IPE.08316	0	5.267	-44.133	1000	determined by crew using onboard GPS	WGS84	3273		Imaged at 10x magnification, broken open, imaged again on SEM	425-600	KC_4-6_136	Globorotalia menardii
IP.308912	KC78	IPE.08316	0	5.267	-44.133	1000	determined by crew using onboard GPS	WGS84	3273		Imaged at 10x magnification, broken open, imaged again on SEM	425-600	KC_4-6_137	Orbulina universa
IP.308913	KC78	IPE.08316	0	5.267	-44.133	1000	determined by crew using onboard GPS	WGS84	3273		Imaged at 10x magnification, broken open, imaged again on SEM	425-600	KC_4-6_138	Globorotalia menardii
IP.308914	KC78	IPE.08316	0	5.267	-44.133	1000	determined by crew using onboard GPS	WGS84	3273		Imaged at 10x magnification, broken open, imaged again on SEM	425-600	KC_4-6_139	Globorotalia menardii
IP.308915	KC78	IPE.08316	0	5.267	-44.133	1000	determined by crew using onboard GPS	WGS84	3273		Imaged at 10x magnification, broken open, imaged again on SEM	425-600	KC_4-6_014	Pulleniatina obliquiloculata
IP.308916	KC78	IPE.08316	0	5.267	-44.133	1000	determined by crew using onboard GPS	WGS84	3273		Imaged at 10x magnification, broken open, imaged again on SEM	425-600	KC_4-6_014-2	Globigerinoides ruber
IP.308917	KC78	IPE.08316	0	5.267	-44.133	1000	determined by crew using onboard GPS	WGS84	3273		Imaged at 10x magnification, broken open, imaged again on SEM	425-600	KC_4-6_140	Globigerinoides sacculifer
IP.308918	KC78	IPE.08316	0	5.267	-44.133	1000	determined by crew using onboard GPS	WGS84	3273		Imaged at 10x magnification, broken open, imaged again on SEM	425-600	KC_4-6_141	Orbulina universa
IP.308919	KC78	IPE.08316	0	5.267	-44.133	1000	determined by crew using onboard GPS	WGS84	3273		Imaged at 10x magnification, broken open, imaged again on SEM	425-600	KC_4-6_142	Globigerinoides sacculifer
IP.308920	KC78	IPE.08316	0	5.267	-44.133	1000	determined by crew using onboard GPS	WGS84	3273		Imaged at 10x magnification, broken open, imaged again on SEM	425-600	KC_4-6_143	Globorotalia menardii
IP.308921	KC78	IPE.08316	0	5.267	-44.133	1000	determined by crew using onboard GPS	WGS84	3273		Imaged at 10x magnification, broken open, imaged again on SEM	425-600	KC_4-6_144	Globigerinoides sacculifer
IP.308922	KC78	IPE.08316	0	5.267	-44.133	1000	determined by crew using onboard GPS	WGS84	3273		Imaged at 10x magnification, broken open, imaged again on SEM	425-600	KC_4-6_145	Globigerinoides sacculifer
IP.308923	KC78	IPE.08316	0	5.267	-44.133	1000	determined by crew using onboard GPS	WGS84	3273		Imaged at 10x magnification, broken open, imaged again on SEM	425-600	KC_4-6_146	Globigerinoides sacculifer
IP.308924	KC78	IPE.08316	0	5.267	-44.133	1000	determined by crew using onboard GPS	WGS84	3273		Imaged at 10x magnification, broken open, imaged again on SEM	425-600	KC_4-6_147	Orbulina universa
IP.308925	KC78	IPE.08316	0	5.267	-44.133	1000	determined by crew using onboard GPS	WGS84	3273		Imaged at 10x magnification, broken open, imaged again on SEM	425-600	KC_4-6_148	Globigerinoides sacculifer
IP.308926	KC78	IPE.08316	0	5.267	-44.133	1000	determined by crew using onboard GPS	WGS84	3273		Imaged at 10x magnification, broken open, imaged again on SEM	425-600	KC_4-6_149	Globorotalia menardii
IP.308927	KC78	IPE.08316	0	5.267	-44.133	1000	determined by crew using onboard GPS	WGS84	3273		Imaged at 10x magnification, broken open, imaged again on SEM	425-600	KC_4-6_015	Globigerinoides sacculifer
IP.308928	KC78	IPE.08316	0	5.267	-44.133	1000	determined by crew using onboard GPS	WGS84	3273		Imaged at 10x magnification, broken open, imaged again on SEM	425-600	KC_4-6_015-2	Globigerinoides ruber
IP.308929	KC78	IPE.08316	0	5.267	-44.133	1000	determined by crew using onboard GPS	WGS84	3273		Imaged at 10x magnification, broken open, imaged again on SEM	425-600	KC_4-6_150	Globorotalia menardii
IP.308930	KC78	IPE.08316	0	5.267	-44.133	1000	determined by crew using onboard GPS	WGS84	3273		Imaged at 10x magnification, broken open, imaged again on SEM	425-600	KC_4-6_151	Globorotalia tumida
IP.308931	KC78	IPE.08316	0	5.267	-44.133	1000	determined by crew using onboard GPS	WGS84	3273		Imaged at 10x magnification, broken open, imaged again on SEM	425-600	KC_4-6_152	Globigerinoides sacculifer
IP.308932	KC78	IPE.08316	0	5.267	-44.133	1000	determined by crew using onboard GPS	WGS84	3273		Imaged at 10x magnification, broken open, imaged again on SEM	425-600	KC_4-6_153	Globigerinoides sacculifer
IP.308933	KC78	IPE.08316	0	5.267	-44.133	1000	determined by crew using onboard GPS	WGS84	3273		Imaged at 10x magnification, broken open, imaged again on SEM	425-600	KC_4-6_154	Globorotalia tumida
IP.308934	KC78	IPE.08316	0	5.267	-44.133	1000	determined by crew using onboard GPS	WGS84	3273		Imaged at 10x magnification, broken open, imaged again on SEM	425-600	KC_4-6_155	Orbulina universa
IP.308935	KC78	IPE.08316	0	5.267	-44.133	1000	determined by crew using onboard GPS	WGS84	3273		Imaged at 10x magnification, broken open, imaged again on SEM	425-600	KC_4-6_156	Globigerinoides sacculifer
IP.308936	KC78	IPE.08316	0	5.267	-44.133	1000	determined by crew using onboard GPS	WGS84	3273		Imaged at 10x magnification, broken open, imaged again on SEM	425-600	KC_4-6_157	Neogloboquadrina dutertrei
IP.308937	KC78	IPE.08316	0	5.267	-44.133	1000	determined by crew using onboard GPS	WGS84	3273		Imaged at 10x magnification, broken open, imaged again on SEM	425-600	KC_4-6_158	Globigerinoides sacculifer
IP.308938	KC78	IPE.08316	0	5.267	-44.133	1000	determined by crew using onboard GPS	WGS84	3273		Imaged at 10x magnification, broken open, imaged again on SEM	425-600	KC_4-6_159	Orbulina universa
IP.308939	KC78	IPE.08316	0	5.267	-44.133	1000	determined by crew using onboard GPS	WGS84	3273		Imaged at 10x magnification, broken open, imaged again on SEM	425-600	KC_4-6_016	Orbulina universa
IP.308940	KC78	IPE.08316	0	5.267	-44.133	1000	determined by crew using onboard GPS	WGS84	3273		Imaged at 10x magnification, broken open, imaged again on SEM	425-600	KC_4-6_016-2	Globigerinoides ruber
IP.308941	KC78	IPE.08316	0	5.267	-44.133	1000	determined by crew using onboard GPS	WGS84	3273		Imaged at 10x magnification, broken open, imaged again on SEM	425-600	KC_4-6_160	Globorotalia tumida
IP.308942	KC78	IPE.08316	0	5.267	-44.133	1000	determined by crew using onboard GPS	WGS84	3273		Imaged at 10x magnification, broken open, imaged again on SEM	425-600	KC_4-6_161	Globigerinoides sacculifer
IP.308943	KC78	IPE.08316	0	5.267	-44.133	1000	determined by crew using onboard GPS	WGS84	3273		Imaged at 10x magnification, broken open, imaged again on SEM	425-600	KC_4-6_162	Globigerinoides sacculifer
IP.308944	KC78	IPE.08316	0	5.267	-44.133	1000	determined by crew using onboard GPS	WGS84	3273		Imaged at 10x magnification, broken open, imaged again on SEM	425-600	KC_4-6_163	Globorotalia menardii
IP.308945	KC78	IPE.08316	0	5.267	-44.133	1000	determined by crew using onboard GPS	WGS84	3273		Imaged at 10x magnification, broken open, imaged again on SEM	425-600	KC_4-6_164	Globigerinoides sacculifer
IP.308946	KC78	IPE.08316	0	5.267	-44.133	1000	determined by crew using onboard GPS	WGS84	3273		Imaged at 10x magnification, broken open, imaged again on SEM	425-600	KC_4-6_165	Globorotalia menardii
IP.308947	KC78	IPE.08316	0	5.267	-44.133	1000	determined by crew using onboard GPS	WGS84	3273		Imaged at 10x magnification, broken open, imaged again on SEM	425-600	KC_4-6_166	Globigerinoides sacculifer
IP.308948	KC78	IPE.08316	0	5.267	-44.133	1000	determined by crew using onboard GPS	WGS84	3273		Imaged at 10x magnification, broken open, imaged again on SEM	425-600	KC_4-6_167	Globigerinoides sacculifer
IP.308949	KC78	IPE.08316	0	5.267	-44.133	1000	determined by crew using onboard GPS	WGS84	3273		Imaged at 10x magnification, broken open, imaged again on SEM	425-600	KC_4-6_168	Globigerinoides sacculifer
IP.308950	KC78	IPE.08316	0	5.267	-44.133	1000	determined by crew using onboard GPS	WGS84	3273		Imaged at 10x magnification, broken open, imaged again on SEM	425-600	KC_4-6_169	Globorotalia menardii
IP.308951	KC78	IPE.08316	0	5.267	-44.133	1000	determined by crew using onboard GPS	WGS84	3273		Imaged at 10x magnification, broken open, imaged again on SEM	425-600	KC_4-6_017	Globigerinoides sacculifer
IP.308952	KC78	IPE.08316	0	5.267	-44.133	1000	determined by crew using onboard GPS	WGS84	3273		Imaged at 10x magnification, broken open, imaged again on SEM	425-600	KC_4-6_170	Globorotalia menardii
IP.308953	KC78	IPE.08316	0	5.267	-44.133	1000	determined by crew using onboard GPS	WGS84	3273		Imaged at 10x magnification, broken open, imaged again on SEM	425-600	KC_4-6_171	Globorotalia tumida
IP.308954	KC78	IPE.08316	0	5.267	-44.133	1000	determined by crew using onboard GPS	WGS84	3273		Imaged at 10x magnification, broken open, imaged again on SEM	425-600	KC_4-6_172	Globigerinoides sacculifer
IP.308955	KC78	IPE.08316	0	5.267	-44.133	1000	determined by crew using onboard GPS	WGS84	3273		Imaged at 10x magnification, broken open, imaged again on SEM	425-600	KC_4-6_173	Globigerinoides sacculifer
IP.308956	KC78	IPE.08316	0	5.267	-44.133	1000	determined by crew using onboard GPS	WGS84	3273		Imaged at 10x magnification, broken open, imaged again on SEM	425-600	KC_4-6_174	Globigerinoides sacculifer
IP.308957	KC78	IPE.08316	0	5.267	-44.133	1000	determined by crew using onboard GPS	WGS84	3273		Imaged at 10x magnification, broken open, imaged again on SEM	425-600	KC_4-6_175	Globigerinoides sacculifer
IP.308958	KC78	IPE.08316	0	5.267	-44.133	1000	determined by crew using onboard GPS	WGS84	3273		Imaged at 10x magnification, broken open, imaged again on SEM	425-600	KC_4-6_176	Globigerinoides sacculifer
IP.308959	KC78	IPE.08316	0	5.267	-44.133	1000	determined by crew using onboard GPS	WGS84	3273		Imaged at 10x magnification, broken open, imaged again on SEM	425-600	KC_4-6_177	Globigerinoides sacculifer
IP.308960	KC78	IPE.08316	0	5.267	-44.133	1000	determined by crew using onboard GPS	WGS84	3273		Imaged at 10x magnification, broken open, imaged again on SEM	425-600	KC_4-6_178	Globigerinoides ruber
IP.308961	KC78	IPE.08316	0	5.267	-44.133	1000	determined by crew using onboard GPS	WGS84	3273		Imaged at 10x magnification, broken open, imaged again on SEM	425-600	KC_4-6_179	Globorotalia tumida
IP.308962	KC78	IPE.08316	0	5.267	-44.133	1000	determined by crew using onboard GPS	WGS84	3273		Imaged at 10x magnification, broken open, imaged again on SEM	425-600	KC_4-6_018	Globigerinoides sacculifer
IP.308963	KC78	IPE.08316	0	5.267	-44.133	1000	determined by crew using onboard GPS	WGS84	3273		Imaged at 10x magnification, broken open, imaged again on SEM	425-600	KC_4-6_018-2	Globigerinoides ruber
IP.308964	KC78	IPE.08316	0	5.267	-44.133	1000	determined by crew using onboard GPS	WGS84	3273		Imaged at 10x magnification, broken open, imaged again on SEM	425-600	KC_4-6_180	Globorotalia tumida
IP.308965	KC78	IPE.08316	0	5.267	-44.133	1000	determined by crew using onboard GPS	WGS84	3273		Imaged at 10x magnification, broken open, imaged again on SEM	425-600	KC_4-6_181	Globorotalia menardii
IP.308966	KC78	IPE.08316	0	5.267	-44.133	1000	determined by crew using onboard GPS	WGS84	3273		Imaged at 10x magnification, broken open, imaged again on SEM	425-600	KC_4-6_182	Globigerinoides sacculifer
IP.308967	KC78	IPE.08316	0	5.267	-44.133	1000	determined by crew using onboard GPS	WGS84	3273		Imaged at 10x magnification, broken open, imaged again on SEM	425-600	KC_4-6_183	Globigerinoides sacculifer
IP.308968	KC78	IPE.08316	0	5.267	-44.133	1000	determined by crew using onboard GPS	WGS84	3273		Imaged at 10x magnification, broken open, imaged again on SEM	425-600	KC_4-6_184	Globigerinoides sacculifer
IP.308969	KC78	IPE.08316	0	5.267	-44.133	1000	determined by crew using onboard GPS	WGS84	3273		Imaged at 10x magnification, broken open, imaged again on SEM	425-600	KC_4-6_185	Globigerinoides sacculifer
IP.308970	KC78	IPE.08316	0	5.267	-44.133	1000	determined by crew using onboard GPS	WGS84	3273		Imaged at 10x magnification, broken open, imaged again on SEM	425-600	KC_4-6_186	Globigerinoides sacculifer
IP.308971	KC78	IPE.08316	0	5.267	-44.133	1000	determined by crew using onboard GPS	WGS84	3273		Imaged at 10x magnification, broken open, imaged again on SEM	425-600	KC_4-6_187	Globorotalia tumida
IP.308972	KC78	IPE.08316	0	5.267	-44.133	1000	determined by crew using onboard GPS	WGS84	3273		Imaged at 10x magnification, broken open, imaged again on SEM	425-600	KC_4-6_188	Globigerinoides sacculifer
IP.308973	KC78	IPE.08316	0	5.267	-44.133	1000	determined by crew using onboard GPS	WGS84	3273		Imaged at 10x magnification, broken open, imaged again on SEM	425-600	KC_4-6_189	Globorotalia menardii
IP.308974	KC78	IPE.08316	0	5.267	-44.133	1000	determined by crew using onboard GPS	WGS84	3273		Imaged at 10x magnification, broken open, imaged again on SEM	425-600	KC_4-6_019	Globigerinoides sacculifer
IP.308975	KC78	IPE.08316	0	5.267	-44.133	1000	determined by crew using onboard GPS	WGS84	3273		Imaged at 10x magnification, broken open, imaged again on SEM	425-600	KC_4-6_019-2	Globigerinoides ruber
IP.308976	KC78	IPE.08316	0	5.267	-44.133	1000	determined by crew using onboard GPS	WGS84	3273		Imaged at 10x magnification, broken open, imaged again on SEM	425-600	KC_4-6_190	Globorotalia tumida
IP.308977	KC78	IPE.08316	0	5.267	-44.133	1000	determined by crew using onboard GPS	WGS84	3273		Imaged at 10x magnification, broken open, imaged again on SEM	425-600	KC_4-6_191	Globigerinoides sacculifer
IP.308978	KC78	IPE.08316	0	5.267	-44.133	1000	determined by crew using onboard GPS	WGS84	3273		Imaged at 10x magnification, broken open, imaged again on SEM	425-600	KC_4-6_192	Neogloboquadrina dutertrei
IP.308979	KC78	IPE.08316	0	5.267	-44.133	1000	determined by crew using onboard GPS	WGS84	3273		Imaged at 10x magnification, broken open, imaged again on SEM	425-600	KC_4-6_193	Globorotalia menardii
IP.308980	KC78	IPE.08316	0	5.267	-44.133	1000	determined by crew using onboard GPS	WGS84	3273		Imaged at 10x magnification, broken open, imaged again on SEM	425-600	KC_4-6_194	Globigerinoides sacculifer
IP.308981	KC78	IPE.08316	0	5.267	-44.133	1000	determined by crew using onboard GPS	WGS84	3273		Imaged at 10x magnification, broken open, imaged again on SEM	425-600	KC_4-6_195	Neogloboquadrina dutertrei
IP.308982	KC78	IPE.08316	0	5.267	-44.133	1000	determined by crew using onboard GPS	WGS84	3273		Imaged at 10x magnification, broken open, imaged again on SEM	425-600	KC_4-6_196	Neogloboquadrina dutertrei
IP.308983	KC78	IPE.08316	0	5.267	-44.133	1000	determined by crew using onboard GPS	WGS84	3273		Imaged at 10x magnification, broken open, imaged again on SEM	425-600	KC_4-6_197	Globigerinoides sacculifer
IP.308984	KC78	IPE.08316	0	5.267	-44.133	1000	determined by crew using onboard GPS	WGS84	3273		Imaged at 10x magnification, broken open, imaged again on SEM	425-600	KC_4-6_198	Globigerinoides ruber
IP.308985	KC78	IPE.08316	0	5.267	-44.133	1000	determined by crew using onboard GPS	WGS84	3273		Imaged at 10x magnification, broken open, imaged again on SEM	425-600	KC_4-6_199	Globigerinoides sacculifer
IP.308986	KC78	IPE.08316	0	5.267	-44.133	1000	determined by crew using onboard GPS	WGS84	3273		Imaged at 10x magnification, broken open, imaged again on SEM	425-600	KC_4-6_002	Globigerinoides sacculifer
IP.308987	KC78	IPE.08316	0	5.267	-44.133	1000	determined by crew using onboard GPS	WGS84	3273		Imaged at 10x magnification, broken open, imaged again on SEM	425-600	KC_4-6_002-2	Globigerinoides conglobatus
IP.308988	KC78	IPE.08316	0	5.267	-44.133	1000	determined by crew using onboard GPS	WGS84	3273		Imaged at 10x magnification, broken open, imaged again on SEM	425-600	KC_4-6_020	Orbulina universa
IP.308989	KC78	IPE.08316	0	5.267	-44.133	1000	determined by crew using onboard GPS	WGS84	3273		Imaged at 10x magnification, broken open, imaged again on SEM	425-600	KC_4-6_020-2	Globigerinoides conglobatus
IP.308990	KC78	IPE.08316	0	5.267	-44.133	1000	determined by crew using onboard GPS	WGS84	3273		Imaged at 10x magnification, broken open, imaged again on SEM	425-600	KC_4-6_0200	Globigerinoides sacculifer
IP.308991	KC78	IPE.08316	0	5.267	-44.133	1000	determined by crew using onboard GPS	WGS84	3273		Imaged at 10x magnification, broken open, imaged again on SEM	425-600	KC_4-6_201	Globorotalia menardii
IP.308992	KC78	IPE.08316	0	5.267	-44.133	1000	determined by crew using onboard GPS	WGS84	3273		Imaged at 10x magnification, broken open, imaged again on SEM	425-600	KC_4-6_202	Globigerinoides sacculifer
IP.308993	KC78	IPE.08316	0	5.267	-44.133	1000	determined by crew using onboard GPS	WGS84	3273		Imaged at 10x magnification, broken open, imaged again on SEM	425-600	KC_4-6_203	Globorotalia tumida
IP.308994	KC78	IPE.08316	0	5.267	-44.133	1000	determined by crew using onboard GPS	WGS84	3273		Imaged at 10x magnification, broken open, imaged again on SEM	425-600	KC_4-6_204	Globigerinoides sacculifer
IP.308995	KC78	IPE.08316	0	5.267	-44.133	1000	determined by crew using onboard GPS	WGS84	3273		Imaged at 10x magnification, broken open, imaged again on SEM	425-600	KC_4-6_205	Orbulina universa
IP.308996	KC78	IPE.08316	0	5.267	-44.133	1000	determined by crew using onboard GPS	WGS84	3273		Imaged at 10x magnification, broken open, imaged again on SEM	425-600	KC_4-6_206	Globorotalia tumida
IP.308997	KC78	IPE.08316	0	5.267	-44.133	1000	determined by crew using onboard GPS	WGS84	3273		Imaged at 10x magnification, broken open, imaged again on SEM	425-600	KC_4-6_207	Globigerinoides conglobatus
IP.308998	KC78	IPE.08316	0	5.267	-44.133	1000	determined by crew using onboard GPS	WGS84	3273		Imaged at 10x magnification, broken open, imaged again on SEM	425-600	KC_4-6_208	Globigerinoides sacculifer
IP.308999	KC78	IPE.08316	0	5.267	-44.133	1000	determined by crew using onboard GPS	WGS84	3273		Imaged at 10x magnification, broken open, imaged again on SEM	425-600	KC_4-6_209	Globigerinoides sacculifer
IP.309000	KC78	IPE.08316	0	5.267	-44.133	1000	determined by crew using onboard GPS	WGS84	3273		Imaged at 10x magnification, broken open, imaged again on SEM	425-600	KC_4-6_021	Orbulina universa
IP.309001	KC78	IPE.08316	0	5.267	-44.133	1000	determined by crew using onboard GPS	WGS84	3273		Imaged at 10x magnification, broken open, imaged again on SEM	425-600	KC_4-6_021-2	Globigerinoides ruber
IP.309002	KC78	IPE.08316	0	5.267	-44.133	1000	determined by crew using onboard GPS	WGS84	3273		Imaged at 10x magnification, broken open, imaged again on SEM	425-600	KC_4-6_210	Globigerinoides sacculifer
IP.309003	KC78	IPE.08316	0	5.267	-44.133	1000	determined by crew using onboard GPS	WGS84	3273		Imaged at 10x magnification, broken open, imaged again on SEM	425-600	KC_4-6_211	Globigerinoides sacculifer
IP.309004	KC78	IPE.08316	0	5.267	-44.133	1000	determined by crew using onboard GPS	WGS84	3273		Imaged at 10x magnification, broken open, imaged again on SEM	425-600	KC_4-6_212	Globigerinoides sacculifer
IP.309005	KC78	IPE.08316	0	5.267	-44.133	1000	determined by crew using onboard GPS	WGS84	3273		Imaged at 10x magnification, broken open, imaged again on SEM	425-600	KC_4-6_213	Neogloboquadrina dutertrei
IP.309006	KC78	IPE.08316	0	5.267	-44.133	1000	determined by crew using onboard GPS	WGS84	3273		Imaged at 10x magnification, broken open, imaged again on SEM	425-600	KC_4-6_214	Globigerinoides sacculifer
IP.309007	KC78	IPE.08316	0	5.267	-44.133	1000	determined by crew using onboard GPS	WGS84	3273		Imaged at 10x magnification, broken open, imaged again on SEM	425-600	KC_4-6_215	Globigerinoides sacculifer
IP.309008	KC78	IPE.08316	0	5.267	-44.133	1000	determined by crew using onboard GPS	WGS84	3273		Imaged at 10x magnification, broken open, imaged again on SEM	425-600	KC_4-6_216	Globigerinoides sacculifer
IP.309009	KC78	IPE.08316	0	5.267	-44.133	1000	determined by crew using onboard GPS	WGS84	3273		Imaged at 10x magnification, broken open, imaged again on SEM	425-600	KC_4-6_217	Orbulina universa
IP.309010	KC78	IPE.08316	0	5.267	-44.133	1000	determined by crew using onboard GPS	WGS84	3273		Imaged at 10x magnification, broken open, imaged again on SEM	425-600	KC_4-6_218	Neogloboquadrina dutertrei
IP.309011	KC78	IPE.08316	0	5.267	-44.133	1000	determined by crew using onboard GPS	WGS84	3273		Imaged at 10x magnification, broken open, imaged again on SEM	425-600	KC_4-6_219	Neogloboquadrina dutertrei
IP.309012	KC78	IPE.08316	0	5.267	-44.133	1000	determined by crew using onboard GPS	WGS84	3273		Imaged at 10x magnification, broken open, imaged again on SEM	425-600	KC_4-6_022	Globorotalia tumida
IP.309013	KC78	IPE.08316	0	5.267	-44.133	1000	determined by crew using onboard GPS	WGS84	3273		Imaged at 10x magnification, broken open, imaged again on SEM	425-600	KC_4-6_220	Unknown
IP.309014	KC78	IPE.08316	0	5.267	-44.133	1000	determined by crew using onboard GPS	WGS84	3273		Imaged at 10x magnification, broken open, imaged again on SEM	425-600	KC_4-6_221	Unknown
IP.309015	KC78	IPE.08316	0	5.267	-44.133	1000	determined by crew using onboard GPS	WGS84	3273		Imaged at 10x magnification, broken open, imaged again on SEM	425-600	KC_4-6_222	Globigerinoides sacculifer
IP.309016	KC78	IPE.08316	0	5.267	-44.133	1000	determined by crew using onboard GPS	WGS84	3273		Imaged at 10x magnification, broken open, imaged again on SEM	425-600	KC_4-6_223	Neogloboquadrina dutertrei
IP.309017	KC78	IPE.08316	0	5.267	-44.133	1000	determined by crew using onboard GPS	WGS84	3273		Imaged at 10x magnification, broken open, imaged again on SEM	425-600	KC_4-6_224	Globigerinoides sacculifer
IP.309018	KC78	IPE.08316	0	5.267	-44.133	1000	determined by crew using onboard GPS	WGS84	3273		Imaged at 10x magnification, broken open, imaged again on SEM	425-600	KC_4-6_225	Orbulina universa
IP.309019	KC78	IPE.08316	0	5.267	-44.133	1000	determined by crew using onboard GPS	WGS84	3273		Imaged at 10x magnification, broken open, imaged again on SEM	425-600	KC_4-6_226	Globigerinoides sacculifer
IP.309020	KC78	IPE.08316	0	5.267	-44.133	1000	determined by crew using onboard GPS	WGS84	3273		Imaged at 10x magnification, broken open, imaged again on SEM	425-600	KC_4-6_227	Orbulina universa
IP.309021	KC78	IPE.08316	0	5.267	-44.133	1000	determined by crew using onboard GPS	WGS84	3273		Imaged at 10x magnification, broken open, imaged again on SEM	425-600	KC_4-6_228	Globigerinoides sacculifer
IP.309022	KC78	IPE.08316	0	5.267	-44.133	1000	determined by crew using onboard GPS	WGS84	3273		Imaged at 10x magnification, broken open, imaged again on SEM	425-600	KC_4-6_229	Neogloboquadrina dutertrei
IP.309023	KC78	IPE.08316	0	5.267	-44.133	1000	determined by crew using onboard GPS	WGS84	3273		Imaged at 10x magnification, broken open, imaged again on SEM	425-600	KC_4-6_023	Orbulina universa
IP.309024	KC78	IPE.08316	0	5.267	-44.133	1000	determined by crew using onboard GPS	WGS84	3273		Imaged at 10x magnification, broken open, imaged again on SEM	425-600	KC_4-6_023-2	Pulleniatina obliquiloculata
IP.309025	KC78	IPE.08316	0	5.267	-44.133	1000	determined by crew using onboard GPS	WGS84	3273		Imaged at 10x magnification, broken open, imaged again on SEM	425-600	KC_4-6_230	Globigerinoides sacculifer
IP.309026	KC78	IPE.08316	0	5.267	-44.133	1000	determined by crew using onboard GPS	WGS84	3273		Imaged at 10x magnification, broken open, imaged again on SEM	425-600	KC_4-6_231	Globorotalia menardii
IP.309027	KC78	IPE.08316	0	5.267	-44.133	1000	determined by crew using onboard GPS	WGS84	3273		Imaged at 10x magnification, broken open, imaged again on SEM	425-600	KC_4-6_232	Globorotalia menardii
IP.309028	KC78	IPE.08316	0	5.267	-44.133	1000	determined by crew using onboard GPS	WGS84	3273		Imaged at 10x magnification, broken open, imaged again on SEM	425-600	KC_4-6_233	Globigerinoides sacculifer
IP.309029	KC78	IPE.08316	0	5.267	-44.133	1000	determined by crew using onboard GPS	WGS84	3273		Imaged at 10x magnification, broken open, imaged again on SEM	425-600	KC_4-6_234	Globigerinoides sacculifer
IP.309030	KC78	IPE.08316	0	5.267	-44.133	1000	determined by crew using onboard GPS	WGS84	3273		Imaged at 10x magnification, broken open, imaged again on SEM	425-600	KC_4-6_235	Globigerinoides sacculifer
IP.309031	KC78	IPE.08316	0	5.267	-44.133	1000	determined by crew using onboard GPS	WGS84	3273		Imaged at 10x magnification, broken open, imaged again on SEM	425-600	KC_4-6_236	Globigerinoides sacculifer
IP.309032	KC78	IPE.08316	0	5.267	-44.133	1000	determined by crew using onboard GPS	WGS84	3273		Imaged at 10x magnification, broken open, imaged again on SEM	425-600	KC_4-6_237	Globigerinoides sacculifer
IP.309033	KC78	IPE.08316	0	5.267	-44.133	1000	determined by crew using onboard GPS	WGS84	3273		Imaged at 10x magnification, broken open, imaged again on SEM	425-600	KC_4-6_238	Orbulina universa
IP.309034	KC78	IPE.08316	0	5.267	-44.133	1000	determined by crew using onboard GPS	WGS84	3273		Imaged at 10x magnification, broken open, imaged again on SEM	425-600	KC_4-6_239	Globorotalia tumida
IP.309035	KC78	IPE.08316	0	5.267	-44.133	1000	determined by crew using onboard GPS	WGS84	3273		Imaged at 10x magnification, broken open, imaged again on SEM	425-600	KC_4-6_024	Globigerinoides sacculifer
IP.309036	KC78	IPE.08316	0	5.267	-44.133	1000	determined by crew using onboard GPS	WGS84	3273		Imaged at 10x magnification, broken open, imaged again on SEM	425-600	KC_4-6_024-2	Globigerinoides conglobatus
IP.309037	KC78	IPE.08316	0	5.267	-44.133	1000	determined by crew using onboard GPS	WGS84	3273		Imaged at 10x magnification, broken open, imaged again on SEM	425-600	KC_4-6_240	Globigerinoides sacculifer
IP.309038	KC78	IPE.08316	0	5.267	-44.133	1000	determined by crew using onboard GPS	WGS84	3273		Imaged at 10x magnification, broken open, imaged again on SEM	425-600	KC_4-6_241	Globigerinoides sacculifer
IP.309039	KC78	IPE.08316	0	5.267	-44.133	1000	determined by crew using onboard GPS	WGS84	3273		Imaged at 10x magnification, broken open, imaged again on SEM	425-600	KC_4-6_242	Globigerinoides sacculifer
IP.309040	KC78	IPE.08316	0	5.267	-44.133	1000	determined by crew using onboard GPS	WGS84	3273		Imaged at 10x magnification, broken open, imaged again on SEM	425-600	KC_4-6_243	Neogloboquadrina dutertrei
IP.309041	KC78	IPE.08316	0	5.267	-44.133	1000	determined by crew using onboard GPS	WGS84	3273		Imaged at 10x magnification, broken open, imaged again on SEM	425-600	KC_4-6_243-2	Globorotalia menardii
IP.309042	KC78	IPE.08316	0	5.267	-44.133	1000	determined by crew using onboard GPS	WGS84	3273		Imaged at 10x magnification, broken open, imaged again on SEM	425-600	KC_4-6_244	Globorotalia menardii
IP.309043	KC78	IPE.08316	0	5.267	-44.133	1000	determined by crew using onboard GPS	WGS84	3273		Imaged at 10x magnification, broken open, imaged again on SEM	425-600	KC_4-6_244-2	Neogloboquadrina dutertrei
IP.309044	KC78	IPE.08316	0	5.267	-44.133	1000	determined by crew using onboard GPS	WGS84	3273		Imaged at 10x magnification, broken open, imaged again on SEM	425-600	KC_4-6_245	Globorotalia menardii
IP.309045	KC78	IPE.08316	0	5.267	-44.133	1000	determined by crew using onboard GPS	WGS84	3273		Imaged at 10x magnification, broken open, imaged again on SEM	425-600	KC_4-6_246	Globigerinoides ruber
IP.309046	KC78	IPE.08316	0	5.267	-44.133	1000	determined by crew using onboard GPS	WGS84	3273		Imaged at 10x magnification, broken open, imaged again on SEM	425-600	KC_4-6_247	Globigerinoides sacculifer
IP.309047	KC78	IPE.08316	0	5.267	-44.133	1000	determined by crew using onboard GPS	WGS84	3273		Imaged at 10x magnification, broken open, imaged again on SEM	425-600	KC_4-6_248	Globorotalia tumida
IP.309048	KC78	IPE.08316	0	5.267	-44.133	1000	determined by crew using onboard GPS	WGS84	3273		Imaged at 10x magnification, broken open, imaged again on SEM	425-600	KC_4-6_249	Globorotalia tumida
IP.309049	KC78	IPE.08316	0	5.267	-44.133	1000	determined by crew using onboard GPS	WGS84	3273		Imaged at 10x magnification, broken open, imaged again on SEM	425-600	KC_4-6_025	Globigerinoides conglobatus
IP.309050	KC78	IPE.08316	0	5.267	-44.133	1000	determined by crew using onboard GPS	WGS84	3273		Imaged at 10x magnification, broken open, imaged again on SEM	425-600	KC_4-6_025-2	Globigerinoides conglobatus
IP.309051	KC78	IPE.08316	0	5.267	-44.133	1000	determined by crew using onboard GPS	WGS84	3273		Imaged at 10x magnification, broken open, imaged again on SEM	425-600	KC_4-6_250	Globorotalia tumida
IP.309052	KC78	IPE.08316	0	5.267	-44.133	1000	determined by crew using onboard GPS	WGS84	3273		Imaged at 10x magnification, broken open, imaged again on SEM	425-600	KC_4-6_251	Globigerinoides sacculifer
IP.309053	KC78	IPE.08316	0	5.267	-44.133	1000	determined by crew using onboard GPS	WGS84	3273		Imaged at 10x magnification, broken open, imaged again on SEM	425-600	KC_4-6_252	Globigerinoides sacculifer
IP.309054	KC78	IPE.08316	0	5.267	-44.133	1000	determined by crew using onboard GPS	WGS84	3273		Imaged at 10x magnification, broken open, imaged again on SEM	425-600	KC_4-6_253	Globigerinoides sacculifer
IP.309055	KC78	IPE.08316	0	5.267	-44.133	1000	determined by crew using onboard GPS	WGS84	3273		Imaged at 10x magnification, broken open, imaged again on SEM	425-600	KC_4-6_254	Globigerinoides sacculifer
IP.309056	KC78	IPE.08316	0	5.267	-44.133	1000	determined by crew using onboard GPS	WGS84	3273		Imaged at 10x magnification, broken open, imaged again on SEM	425-600	KC_4-6_255	Globorotalia tumida
IP.309057	KC78	IPE.08316	0	5.267	-44.133	1000	determined by crew using onboard GPS	WGS84	3273		Imaged at 10x magnification, broken open, imaged again on SEM	425-600	KC_4-6_256	Globigerinoides sacculifer
IP.309058	KC78	IPE.08316	0	5.267	-44.133	1000	determined by crew using onboard GPS	WGS84	3273		Imaged at 10x magnification, broken open, imaged again on SEM	425-600	KC_4-6_257	Globorotalia menardii
IP.309059	KC78	IPE.08316	0	5.267	-44.133	1000	determined by crew using onboard GPS	WGS84	3273		Imaged at 10x magnification, broken open, imaged again on SEM	425-600	KC_4-6_258	Globorotalia tumida
IP.309060	KC78	IPE.08316	0	5.267	-44.133	1000	determined by crew using onboard GPS	WGS84	3273		Imaged at 10x magnification, broken open, imaged again on SEM	425-600	KC_4-6_259	Globigerinoides sacculifer
IP.309061	KC78	IPE.08316	0	5.267	-44.133	1000	determined by crew using onboard GPS	WGS84	3273		Imaged at 10x magnification, broken open, imaged again on SEM	425-600	KC_4-6_26	Globorotalia menardii
IP.309062	KC78	IPE.08316	0	5.267	-44.133	1000	determined by crew using onboard GPS	WGS84	3273		Imaged at 10x magnification, broken open, imaged again on SEM	425-600	KC_4-6_26-2	Pulleniatina obliquiloculata
IP.309063	KC78	IPE.08316	0	5.267	-44.133	1000	determined by crew using onboard GPS	WGS84	3273		Imaged at 10x magnification, broken open, imaged again on SEM	425-600	KC_4-6_260	Globigerinoides sacculifer
IP.309064	KC78	IPE.08316	0	5.267	-44.133	1000	determined by crew using onboard GPS	WGS84	3273		Imaged at 10x magnification, broken open, imaged again on SEM	425-600	KC_4-6_261	Globigerinoides sacculifer
IP.309065	KC78	IPE.08316	0	5.267	-44.133	1000	determined by crew using onboard GPS	WGS84	3273		Imaged at 10x magnification, broken open, imaged again on SEM	425-600	KC_4-6_262	Globigerinoides sacculifer
IP.309066	KC78	IPE.08316	0	5.267	-44.133	1000	determined by crew using onboard GPS	WGS84	3273		Imaged at 10x magnification, broken open, imaged again on SEM	425-600	KC_4-6_263	Globorotalia menardii
IP.309067	KC78	IPE.08316	0	5.267	-44.133	1000	determined by crew using onboard GPS	WGS84	3273		Imaged at 10x magnification, broken open, imaged again on SEM	425-600	KC_4-6_264	Globigerinoides sacculifer
IP.309068	KC78	IPE.08316	0	5.267	-44.133	1000	determined by crew using onboard GPS	WGS84	3273		Imaged at 10x magnification, broken open, imaged again on SEM	425-600	KC_4-6_265	Globorotalia menardii
IP.309069	KC78	IPE.08316	0	5.267	-44.133	1000	determined by crew using onboard GPS	WGS84	3273		Imaged at 10x magnification, broken open, imaged again on SEM	425-600	KC_4-6_266	Orbulina universa
IP.309070	KC78	IPE.08316	0	5.267	-44.133	1000	determined by crew using onboard GPS	WGS84	3273		Imaged at 10x magnification, broken open, imaged again on SEM	425-600	KC_4-6_267	Globorotalia menardii
IP.309071	KC78	IPE.08316	0	5.267	-44.133	1000	determined by crew using onboard GPS	WGS84	3273		Imaged at 10x magnification, broken open, imaged again on SEM	425-600	KC_4-6_268	Globigerinoides sacculifer
IP.309072	KC78	IPE.08316	0	5.267	-44.133	1000	determined by crew using onboard GPS	WGS84	3273		Imaged at 10x magnification, broken open, imaged again on SEM	425-600	KC_4-6_269	Globigerinoides sacculifer
IP.309073	KC78	IPE.08316	0	5.267	-44.133	1000	determined by crew using onboard GPS	WGS84	3273		Imaged at 10x magnification, broken open, imaged again on SEM	425-600	KC_4-6_027	Globigerinoides sacculifer
IP.309074	KC78	IPE.08316	0	5.267	-44.133	1000	determined by crew using onboard GPS	WGS84	3273		Imaged at 10x magnification, broken open, imaged again on SEM	425-600	KC_4-6_27-2	Globigerinoides conglobatus
IP.309075	KC78	IPE.08316	0	5.267	-44.133	1000	determined by crew using onboard GPS	WGS84	3273		Imaged at 10x magnification, broken open, imaged again on SEM	425-600	KC_4-6_270	Globigerinoides sacculifer
IP.309076	KC78	IPE.08316	0	5.267	-44.133	1000	determined by crew using onboard GPS	WGS84	3273		Imaged at 10x magnification, broken open, imaged again on SEM	425-600	KC_4-6_271	Globigerinoides sacculifer
IP.309077	KC78	IPE.08316	0	5.267	-44.133	1000	determined by crew using onboard GPS	WGS84	3273		Imaged at 10x magnification, broken open, imaged again on SEM	425-600	KC_4-6_272	Globigerinoides sacculifer
IP.309078	KC78	IPE.08316	0	5.267	-44.133	1000	determined by crew using onboard GPS	WGS84	3273		Imaged at 10x magnification, broken open, imaged again on SEM	425-600	KC_4-6_273	Globigerinoides sacculifer
IP.309079	KC78	IPE.08316	0	5.267	-44.133	1000	determined by crew using onboard GPS	WGS84	3273		Imaged at 10x magnification, broken open, imaged again on SEM	425-600	KC_4-6_274	Globigerinoides sacculifer
IP.309080	KC78	IPE.08316	0	5.267	-44.133	1000	determined by crew using onboard GPS	WGS84	3273		Imaged at 10x magnification, broken open, imaged again on SEM	425-600	KC_4-6_275	Globigerinoides sacculifer
IP.309081	KC78	IPE.08316	0	5.267	-44.133	1000	determined by crew using onboard GPS	WGS84	3273		Imaged at 10x magnification, broken open, imaged again on SEM	425-600	KC_4-6_276	Globorotalia tumida
IP.309082	KC78	IPE.08316	0	5.267	-44.133	1000	determined by crew using onboard GPS	WGS84	3273		Imaged at 10x magnification, broken open, imaged again on SEM	425-600	KC_4-6_277	Globigerinoides sacculifer
IP.309083	KC78	IPE.08316	0	5.267	-44.133	1000	determined by crew using onboard GPS	WGS84	3273		Imaged at 10x magnification, broken open, imaged again on SEM	425-600	KC_4-6_278	Globorotalia menardii
IP.309084	KC78	IPE.08316	0	5.267	-44.133	1000	determined by crew using onboard GPS	WGS84	3273		Imaged at 10x magnification, broken open, imaged again on SEM	425-600	KC_4-6_279	Globigerinoides sacculifer
IP.309085	KC78	IPE.08316	0	5.267	-44.133	1000	determined by crew using onboard GPS	WGS84	3273		Imaged at 10x magnification, broken open, imaged again on SEM	425-600	KC_4-6_028	Globorotalia menardii
IP.309086	KC78	IPE.08316	0	5.267	-44.133	1000	determined by crew using onboard GPS	WGS84	3273		Imaged at 10x magnification, broken open, imaged again on SEM	425-600	KC_4-6_280	Globigerinoides ruber
IP.309087	KC78	IPE.08316	0	5.267	-44.133	1000	determined by crew using onboard GPS	WGS84	3273		Imaged at 10x magnification, broken open, imaged again on SEM	425-600	KC_4-6_281	Globorotalia tumida
IP.309088	KC78	IPE.08316	0	5.267	-44.133	1000	determined by crew using onboard GPS	WGS84	3273		Imaged at 10x magnification, broken open, imaged again on SEM	425-600	KC_4-6_282	Globigerinoides sacculifer
IP.309089	KC78	IPE.08316	0	5.267	-44.133	1000	determined by crew using onboard GPS	WGS84	3273		Imaged at 10x magnification, broken open, imaged again on SEM	425-600	KC_4-6_283	Globigerinoides sacculifer
IP.309090	KC78	IPE.08316	0	5.267	-44.133	1000	determined by crew using onboard GPS	WGS84	3273		Imaged at 10x magnification, broken open, imaged again on SEM	425-600	KC_4-6_284	Globorotalia menardii
IP.309091	KC78	IPE.08316	0	5.267	-44.133	1000	determined by crew using onboard GPS	WGS84	3273		Imaged at 10x magnification, broken open, imaged again on SEM	425-600	KC_4-6_285	Globigerinoides sacculifer
IP.309092	KC78	IPE.08316	0	5.267	-44.133	1000	determined by crew using onboard GPS	WGS84	3273		Imaged at 10x magnification, broken open, imaged again on SEM	425-600	KC_4-6_286	Globorotalia menardii
IP.309093	KC78	IPE.08316	0	5.267	-44.133	1000	determined by crew using onboard GPS	WGS84	3273		Imaged at 10x magnification, broken open, imaged again on SEM	425-600	KC_4-6_287	Globigerinoides sacculifer
IP.309094	KC78	IPE.08316	0	5.267	-44.133	1000	determined by crew using onboard GPS	WGS84	3273		Imaged at 10x magnification, broken open, imaged again on SEM	425-600	KC_4-6_288	Globigerinoides sacculifer
IP.309095	KC78	IPE.08316	0	5.267	-44.133	1000	determined by crew using onboard GPS	WGS84	3273		Imaged at 10x magnification, broken open, imaged again on SEM	425-600	KC_4-6_289	Globigerinoides ruber
IP.309096	KC78	IPE.08316	0	5.267	-44.133	1000	determined by crew using onboard GPS	WGS84	3273		Imaged at 10x magnification, broken open, imaged again on SEM	425-600	KC_4-6_029	Pulleniatina obliquiloculata
IP.309097	KC78	IPE.08316	0	5.267	-44.133	1000	determined by crew using onboard GPS	WGS84	3273		Imaged at 10x magnification, broken open, imaged again on SEM	425-600	KC_4-6_290	Globigerinoides sacculifer
IP.309098	KC78	IPE.08316	0	5.267	-44.133	1000	determined by crew using onboard GPS	WGS84	3273		Imaged at 10x magnification, broken open, imaged again on SEM	425-600	KC_4-6_291	Globigerinoides sacculifer
IP.309099	KC78	IPE.08316	0	5.267	-44.133	1000	determined by crew using onboard GPS	WGS84	3273		Imaged at 10x magnification, broken open, imaged again on SEM	425-600	KC_4-6_292	Globigerinoides sacculifer
IP.309100	KC78	IPE.08316	0	5.267	-44.133	1000	determined by crew using onboard GPS	WGS84	3273		Imaged at 10x magnification, broken open, imaged again on SEM	425-600	KC_4-6_293	Globigerinoides sacculifer
IP.309101	KC78	IPE.08316	0	5.267	-44.133	1000	determined by crew using onboard GPS	WGS84	3273		Imaged at 10x magnification, broken open, imaged again on SEM	425-600	KC_4-6_294	Globigerinoides conglobatus
IP.309102	KC78	IPE.08316	0	5.267	-44.133	1000	determined by crew using onboard GPS	WGS84	3273		Imaged at 10x magnification, broken open, imaged again on SEM	425-600	KC_4-6_295	Globorotalia menardii
IP.309103	KC78	IPE.08316	0	5.267	-44.133	1000	determined by crew using onboard GPS	WGS84	3273		Imaged at 10x magnification, broken open, imaged again on SEM	425-600	KC_4-6_296	Globigerinoides sacculifer
IP.309104	KC78	IPE.08316	0	5.267	-44.133	1000	determined by crew using onboard GPS	WGS84	3273		Imaged at 10x magnification, broken open, imaged again on SEM	425-600	KC_4-6_297	Globigerinoides sacculifer
IP.309105	KC78	IPE.08316	0	5.267	-44.133	1000	determined by crew using onboard GPS	WGS84	3273		Imaged at 10x magnification, broken open, imaged again on SEM	425-600	KC_4-6_298	Globigerinoides sacculifer
IP.309106	KC78	IPE.08316	0	5.267	-44.133	1000	determined by crew using onboard GPS	WGS84	3273		Imaged at 10x magnification, broken open, imaged again on SEM	425-600	KC_4-6_299	Orbulina universa
IP.309107	KC78	IPE.08316	0	5.267	-44.133	1000	determined by crew using onboard GPS	WGS84	3273		Imaged at 10x magnification, broken open, imaged again on SEM	425-600	KC_4-6_003	Globigerinoides sacculifer
IP.309108	KC78	IPE.08316	0	5.267	-44.133	1000	determined by crew using onboard GPS	WGS84	3273		Imaged at 10x magnification, broken open, imaged again on SEM	425-600	KC_4-6_030	Globorotalia menardii
IP.309109	KC78	IPE.08316	0	5.267	-44.133	1000	determined by crew using onboard GPS	WGS84	3273		Imaged at 10x magnification, broken open, imaged again on SEM	425-600	KC_4-6_300	Globigerinoides sacculifer
IP.309110	KC78	IPE.08316	0	5.267	-44.133	1000	determined by crew using onboard GPS	WGS84	3273		Imaged at 10x magnification, broken open, imaged again on SEM	425-600	KC_4-6_301	Neogloboquadrina dutertrei
IP.309111	KC78	IPE.08316	0	5.267	-44.133	1000	determined by crew using onboard GPS	WGS84	3273		Imaged at 10x magnification, broken open, imaged again on SEM	425-600	KC_4-6_302	Globigerinoides sacculifer
IP.309112	KC78	IPE.08316	0	5.267	-44.133	1000	determined by crew using onboard GPS	WGS84	3273		Imaged at 10x magnification, broken open, imaged again on SEM	425-600	KC_4-6_303	Globigerinoides sacculifer
IP.309113	KC78	IPE.08316	0	5.267	-44.133	1000	determined by crew using onboard GPS	WGS84	3273		Imaged at 10x magnification, broken open, imaged again on SEM	425-600	KC_4-6_304	Globigerinoides sacculifer
IP.309114	KC78	IPE.08316	0	5.267	-44.133	1000	determined by crew using onboard GPS	WGS84	3273		Imaged at 10x magnification, broken open, imaged again on SEM	425-600	KC_4-6_305	Globigerinoides sacculifer
IP.309115	KC78	IPE.08316	0	5.267	-44.133	1000	determined by crew using onboard GPS	WGS84	3273		Imaged at 10x magnification, broken open, imaged again on SEM	425-600	KC_4-6_306	Globigerinoides sacculifer
IP.309116	KC78	IPE.08316	0	5.267	-44.133	1000	determined by crew using onboard GPS	WGS84	3273		Imaged at 10x magnification, broken open, imaged again on SEM	425-600	KC_4-6_307	Globigerinoides sacculifer
IP.309117	KC78	IPE.08316	0	5.267	-44.133	1000	determined by crew using onboard GPS	WGS84	3273		Imaged at 10x magnification, broken open, imaged again on SEM	425-600	KC_4-6_308	Globigerinoides sacculifer
IP.309118	KC78	IPE.08316	0	5.267	-44.133	1000	determined by crew using onboard GPS	WGS84	3273		Imaged at 10x magnification, broken open, imaged again on SEM	425-600	KC_4-6_309	Globigerinoides sacculifer
IP.309119	KC78	IPE.08316	0	5.267	-44.133	1000	determined by crew using onboard GPS	WGS84	3273		Imaged at 10x magnification, broken open, imaged again on SEM	425-600	KC_4-6_031	Globorotalia menardii
IP.309120	KC78	IPE.08316	0	5.267	-44.133	1000	determined by crew using onboard GPS	WGS84	3273		Imaged at 10x magnification, broken open, imaged again on SEM	425-600	KC_4-6_310	Orbulina universa
IP.309121	KC78	IPE.08316	0	5.267	-44.133	1000	determined by crew using onboard GPS	WGS84	3273		Imaged at 10x magnification, broken open, imaged again on SEM	425-600	KC_4-6_311	Globigerinoides sacculifer
IP.309122	KC78	IPE.08316	0	5.267	-44.133	1000	determined by crew using onboard GPS	WGS84	3273		Imaged at 10x magnification, broken open, imaged again on SEM	425-600	KC_4-6_312	Globigerinoides sacculifer
IP.309123	KC78	IPE.08316	0	5.267	-44.133	1000	determined by crew using onboard GPS	WGS84	3273		Imaged at 10x magnification, broken open, imaged again on SEM	425-600	KC_4-6_313	Globigerinoides sacculifer
IP.309124	KC78	IPE.08316	0	5.267	-44.133	1000	determined by crew using onboard GPS	WGS84	3273		Imaged at 10x magnification, broken open, imaged again on SEM	425-600	KC_4-6_314	Globorotalia tumida
IP.309125	KC78	IPE.08316	0	5.267	-44.133	1000	determined by crew using onboard GPS	WGS84	3273		Imaged at 10x magnification, broken open, imaged again on SEM	425-600	KC_4-6_315	Globigerinoides ruber
IP.309126	KC78	IPE.08316	0	5.267	-44.133	1000	determined by crew using onboard GPS	WGS84	3273		Imaged at 10x magnification, broken open, imaged again on SEM	425-600	KC_4-6_316	Globigerinoides sacculifer
IP.309127	KC78	IPE.08316	0	5.267	-44.133	1000	determined by crew using onboard GPS	WGS84	3273		Imaged at 10x magnification, broken open, imaged again on SEM	425-600	KC_4-6_317	Globorotalia menardii
IP.309128	KC78	IPE.08316	0	5.267	-44.133	1000	determined by crew using onboard GPS	WGS84	3273		Imaged at 10x magnification, broken open, imaged again on SEM	425-600	KC_4-6_318	Orbulina universa
IP.309129	KC78	IPE.08316	0	5.267	-44.133	1000	determined by crew using onboard GPS	WGS84	3273		Imaged at 10x magnification, broken open, imaged again on SEM	425-600	KC_4-6_319	Globigerinoides sacculifer
IP.309130	KC78	IPE.08316	0	5.267	-44.133	1000	determined by crew using onboard GPS	WGS84	3273		Imaged at 10x magnification, broken open, imaged again on SEM	425-600	KC_4-6_032	Globigerinoides sacculifer
IP.309131	KC78	IPE.08316	0	5.267	-44.133	1000	determined by crew using onboard GPS	WGS84	3273		Imaged at 10x magnification, broken open, imaged again on SEM	425-600	KC_4-6_032-2	Pulleniatina obliquiloculata
IP.309132	KC78	IPE.08316	0	5.267	-44.133	1000	determined by crew using onboard GPS	WGS84	3273		Imaged at 10x magnification, broken open, imaged again on SEM	425-600	KC_4-6_033	Globorotalia menardii
IP.309133	KC78	IPE.08316	0	5.267	-44.133	1000	determined by crew using onboard GPS	WGS84	3273		Imaged at 10x magnification, broken open, imaged again on SEM	425-600	KC_4-6_033-2	Pulleniatina obliquiloculata
IP.309134	KC78	IPE.08316	0	5.267	-44.133	1000	determined by crew using onboard GPS	WGS84	3273		Imaged at 10x magnification, broken open, imaged again on SEM	425-600	KC_4-6_034	Globorotalia menardii
IP.309135	KC78	IPE.08316	0	5.267	-44.133	1000	determined by crew using onboard GPS	WGS84	3273		Imaged at 10x magnification, broken open, imaged again on SEM	425-600	KC_4-6_035	Globigerinoides sacculifer
IP.309136	KC78	IPE.08316	0	5.267	-44.133	1000	determined by crew using onboard GPS	WGS84	3273		Imaged at 10x magnification, broken open, imaged again on SEM	425-600	KC_4-6_035-2	Pulleniatina obliquiloculata
IP.309137	KC78	IPE.08316	0	5.267	-44.133	1000	determined by crew using onboard GPS	WGS84	3273		Imaged at 10x magnification, broken open, imaged again on SEM	425-600	KC_4-6_036	Neogloboquadrina dutertrei
IP.309138	KC78	IPE.08316	0	5.267	-44.133	1000	determined by crew using onboard GPS	WGS84	3273		Imaged at 10x magnification, broken open, imaged again on SEM	425-600	KC_4-6_037	Globorotalia menardii
IP.309139	KC78	IPE.08316	0	5.267	-44.133	1000	determined by crew using onboard GPS	WGS84	3273		Imaged at 10x magnification, broken open, imaged again on SEM	425-600	KC_4-6_037-2	Pulleniatina obliquiloculata
IP.309140	KC78	IPE.08316	0	5.267	-44.133	1000	determined by crew using onboard GPS	WGS84	3273		Imaged at 10x magnification, broken open, imaged again on SEM	425-600	KC_4-6_038	Globorotalia menardii
IP.309141	KC78	IPE.08316	0	5.267	-44.133	1000	determined by crew using onboard GPS	WGS84	3273		Imaged at 10x magnification, broken open, imaged again on SEM	425-600	KC_4-6_039	Globorotalia menardii
IP.309142	KC78	IPE.08316	0	5.267	-44.133	1000	determined by crew using onboard GPS	WGS84	3273		Imaged at 10x magnification, broken open, imaged again on SEM	425-600	KC_4-6_004	Orbulina universa
IP.309143	KC78	IPE.08316	0	5.267	-44.133	1000	determined by crew using onboard GPS	WGS84	3273		Imaged at 10x magnification, broken open, imaged again on SEM	425-600	KC_4-6_4-2	Sphaeroidinella dehiscens
IP.309144	KC78	IPE.08316	0	5.267	-44.133	1000	determined by crew using onboard GPS	WGS84	3273		Imaged at 10x magnification, broken open, imaged again on SEM	425-600	KC_4-6_040	Globigerinoides sacculifer
IP.309145	KC78	IPE.08316	0	5.267	-44.133	1000	determined by crew using onboard GPS	WGS84	3273		Imaged at 10x magnification, broken open, imaged again on SEM	425-600	KC_4-6_040-2	Pulleniatina obliquiloculata
IP.309146	KC78	IPE.08316	0	5.267	-44.133	1000	determined by crew using onboard GPS	WGS84	3273		Imaged at 10x magnification, broken open, imaged again on SEM	425-600	KC_4-6_041	Globorotalia tumida
IP.309147	KC78	IPE.08316	0	5.267	-44.133	1000	determined by crew using onboard GPS	WGS84	3273		Imaged at 10x magnification, broken open, imaged again on SEM	425-600	KC_4-6_041-2	Pulleniatina obliquiloculata
IP.309148	KC78	IPE.08316	0	5.267	-44.133	1000	determined by crew using onboard GPS	WGS84	3273		Imaged at 10x magnification, broken open, imaged again on SEM	425-600	KC_4-6_042	Globorotalia tumida
IP.309149	KC78	IPE.08316	0	5.267	-44.133	1000	determined by crew using onboard GPS	WGS84	3273		Imaged at 10x magnification, broken open, imaged again on SEM	425-600	KC_4-6_042-2	Pulleniatina obliquiloculata
IP.309150	KC78	IPE.08316	0	5.267	-44.133	1000	determined by crew using onboard GPS	WGS84	3273		Imaged at 10x magnification, broken open, imaged again on SEM	425-600	KC_4-6_043	Globorotalia menardii
IP.309151	KC78	IPE.08316	0	5.267	-44.133	1000	determined by crew using onboard GPS	WGS84	3273		Imaged at 10x magnification, broken open, imaged again on SEM	425-600	KC_4-6_044	Orbulina universa
IP.309152	KC78	IPE.08316	0	5.267	-44.133	1000	determined by crew using onboard GPS	WGS84	3273		Imaged at 10x magnification, broken open, imaged again on SEM	425-600	KC_4-6_044-2	Globigerinoides conglobatus
IP.309153	KC78	IPE.08316	0	5.267	-44.133	1000	determined by crew using onboard GPS	WGS84	3273		Imaged at 10x magnification, broken open, imaged again on SEM	425-600	KC_4-6_045	Globigerinoides sacculifer
IP.309154	KC78	IPE.08316	0	5.267	-44.133	1000	determined by crew using onboard GPS	WGS84	3273		Imaged at 10x magnification, broken open, imaged again on SEM	425-600	KC_4-6_046	Globorotalia menardii
IP.309155	KC78	IPE.08316	0	5.267	-44.133	1000	determined by crew using onboard GPS	WGS84	3273		Imaged at 10x magnification, broken open, imaged again on SEM	425-600	KC_4-6_047	Globorotalia tumida
IP.309156	KC78	IPE.08316	0	5.267	-44.133	1000	determined by crew using onboard GPS	WGS84	3273		Imaged at 10x magnification, broken open, imaged again on SEM	425-600	KC_4-6_048	Globigerinella siphonifera
IP.309157	KC78	IPE.08316	0	5.267	-44.133	1000	determined by crew using onboard GPS	WGS84	3273		Imaged at 10x magnification, broken open, imaged again on SEM	425-600	KC_4-6_049	Globigerinoides sacculifer
IP.309158	KC78	IPE.08316	0	5.267	-44.133	1000	determined by crew using onboard GPS	WGS84	3273		Imaged at 10x magnification, broken open, imaged again on SEM	425-600	KC_4-6_005	Globigerinoides sacculifer
IP.309159	KC78	IPE.08316	0	5.267	-44.133	1000	determined by crew using onboard GPS	WGS84	3273		Imaged at 10x magnification, broken open, imaged again on SEM	425-600	KC_4-6_050	Orbulina universa
IP.309160	KC78	IPE.08316	0	5.267	-44.133	1000	determined by crew using onboard GPS	WGS84	3273		Imaged at 10x magnification, broken open, imaged again on SEM	425-600	KC_4-6_051	Globigerinoides sacculifer
IP.309161	KC78	IPE.08316	0	5.267	-44.133	1000	determined by crew using onboard GPS	WGS84	3273		Imaged at 10x magnification, broken open, imaged again on SEM	425-600	KC_4-6_052	Globigerinoides sacculifer
IP.309162	KC78	IPE.08316	0	5.267	-44.133	1000	determined by crew using onboard GPS	WGS84	3273		Imaged at 10x magnification, broken open, imaged again on SEM	425-600	KC_4-6_053	Orbulina universa
IP.309163	KC78	IPE.08316	0	5.267	-44.133	1000	determined by crew using onboard GPS	WGS84	3273		Imaged at 10x magnification, broken open, imaged again on SEM	425-600	KC_4-6_054	Globorotalia menardii
IP.309164	KC78	IPE.08316	0	5.267	-44.133	1000	determined by crew using onboard GPS	WGS84	3273		Imaged at 10x magnification, broken open, imaged again on SEM	425-600	KC_4-6_055	Globigerinoides sacculifer
IP.309165	KC78	IPE.08316	0	5.267	-44.133	1000	determined by crew using onboard GPS	WGS84	3273		Imaged at 10x magnification, broken open, imaged again on SEM	425-600	KC_4-6_056	Globorotalia tumida
IP.309166	KC78	IPE.08316	0	5.267	-44.133	1000	determined by crew using onboard GPS	WGS84	3273		Imaged at 10x magnification, broken open, imaged again on SEM	425-600	KC_4-6_057	Orbulina universa
IP.309167	KC78	IPE.08316	0	5.267	-44.133	1000	determined by crew using onboard GPS	WGS84	3273		Imaged at 10x magnification, broken open, imaged again on SEM	425-600	KC_4-6_058	Globorotalia tumida
IP.309168	KC78	IPE.08316	0	5.267	-44.133	1000	determined by crew using onboard GPS	WGS84	3273		Imaged at 10x magnification, broken open, imaged again on SEM	425-600	KC_4-6_059	Globigerinoides sacculifer
IP.309169	KC78	IPE.08316	0	5.267	-44.133	1000	determined by crew using onboard GPS	WGS84	3273		Imaged at 10x magnification, broken open, imaged again on SEM	425-600	KC_4-6_006	Orbulina universa
IP.309170	KC78	IPE.08316	0	5.267	-44.133	1000	determined by crew using onboard GPS	WGS84	3273		Imaged at 10x magnification, broken open, imaged again on SEM	425-600	KC_4-6_060	Globigerinoides sacculifer
IP.309171	KC78	IPE.08316	0	5.267	-44.133	1000	determined by crew using onboard GPS	WGS84	3273		Imaged at 10x magnification, broken open, imaged again on SEM	425-600	KC_4-6_061	Globorotalia menardii
IP.309172	KC78	IPE.08316	0	5.267	-44.133	1000	determined by crew using onboard GPS	WGS84	3273		Imaged at 10x magnification, broken open, imaged again on SEM	425-600	KC_4-6_062	Globigerinoides sacculifer
IP.309173	KC78	IPE.08316	0	5.267	-44.133	1000	determined by crew using onboard GPS	WGS84	3273		Imaged at 10x magnification, broken open, imaged again on SEM	425-600	KC_4-6_063	Globigerinoides sacculifer
IP.309174	KC78	IPE.08316	0	5.267	-44.133	1000	determined by crew using onboard GPS	WGS84	3273		Imaged at 10x magnification, broken open, imaged again on SEM	425-600	KC_4-6_064	Globorotalia menardii
IP.309175	KC78	IPE.08316	0	5.267	-44.133	1000	determined by crew using onboard GPS	WGS84	3273		Imaged at 10x magnification, broken open, imaged again on SEM	425-600	KC_4-6_065	Globigerinoides sacculifer
IP.309176	KC78	IPE.08316	0	5.267	-44.133	1000	determined by crew using onboard GPS	WGS84	3273		Imaged at 10x magnification, broken open, imaged again on SEM	425-600	KC_4-6_066	Neogloboquadrina dutertrei
IP.309177	KC78	IPE.08316	0	5.267	-44.133	1000	determined by crew using onboard GPS	WGS84	3273		Imaged at 10x magnification, broken open, imaged again on SEM	425-600	KC_4-6_067	Globigerinoides sacculifer
IP.309178	KC78	IPE.08316	0	5.267	-44.133	1000	determined by crew using onboard GPS	WGS84	3273		Imaged at 10x magnification, broken open, imaged again on SEM	425-600	KC_4-6_068	Globigerinoides sacculifer
IP.309179	KC78	IPE.08316	0	5.267	-44.133	1000	determined by crew using onboard GPS	WGS84	3273		Imaged at 10x magnification, broken open, imaged again on SEM	425-600	KC_4-6_069	Orbulina universa
IP.309180	KC78	IPE.08316	0	5.267	-44.133	1000	determined by crew using onboard GPS	WGS84	3273		Imaged at 10x magnification, broken open, imaged again on SEM	425-600	KC_4-6_007	Orbulina universa
IP.309181	KC78	IPE.08316	0	5.267	-44.133	1000	determined by crew using onboard GPS	WGS84	3273		Imaged at 10x magnification, broken open, imaged again on SEM	425-600	KC_4-6_070	Globigerinoides sacculifer
IP.309182	KC78	IPE.08316	0	5.267	-44.133	1000	determined by crew using onboard GPS	WGS84	3273		Imaged at 10x magnification, broken open, imaged again on SEM	425-600	KC_4-6_071	Globigerinoides sacculifer
IP.309183	KC78	IPE.08316	0	5.267	-44.133	1000	determined by crew using onboard GPS	WGS84	3273		Imaged at 10x magnification, broken open, imaged again on SEM	425-600	KC_4-6_072	Orbulina universa
IP.309184	KC78	IPE.08316	0	5.267	-44.133	1000	determined by crew using onboard GPS	WGS84	3273		Imaged at 10x magnification, broken open, imaged again on SEM	425-600	KC_4-6_073	Globorotalia tumida
IP.309185	KC78	IPE.08316	0	5.267	-44.133	1000	determined by crew using onboard GPS	WGS84	3273		Imaged at 10x magnification, broken open, imaged again on SEM	425-600	KC_4-6_074	Globorotalia menardii
IP.309186	KC78	IPE.08316	0	5.267	-44.133	1000	determined by crew using onboard GPS	WGS84	3273		Imaged at 10x magnification, broken open, imaged again on SEM	425-600	KC_4-6_075	Globigerinoides sacculifer
IP.309187	KC78	IPE.08316	0	5.267	-44.133	1000	determined by crew using onboard GPS	WGS84	3273		Imaged at 10x magnification, broken open, imaged again on SEM	425-600	KC_4-6_076	Globigerinoides sacculifer
IP.309188	KC78	IPE.08316	0	5.267	-44.133	1000	determined by crew using onboard GPS	WGS84	3273		Imaged at 10x magnification, broken open, imaged again on SEM	425-600	KC_4-6_077	Globigerinoides sacculifer
IP.309189	KC78	IPE.08316	0	5.267	-44.133	1000	determined by crew using onboard GPS	WGS84	3273		Imaged at 10x magnification, broken open, imaged again on SEM	425-600	KC_4-6_078	Neogloboquadrina dutertrei
IP.309190	KC78	IPE.08316	0	5.267	-44.133	1000	determined by crew using onboard GPS	WGS84	3273		Imaged at 10x magnification, broken open, imaged again on SEM	425-600	KC_4-6_079	Globigerinoides sacculifer
IP.309191	KC78	IPE.08316	0	5.267	-44.133	1000	determined by crew using onboard GPS	WGS84	3273		Imaged at 10x magnification, broken open, imaged again on SEM	425-600	KC_4-6_008	Globigerinoides sacculifer
IP.309192	KC78	IPE.08316	0	5.267	-44.133	1000	determined by crew using onboard GPS	WGS84	3273		Imaged at 10x magnification, broken open, imaged again on SEM	425-600	KC_4-6_080	Globorotalia tumida
IP.309193	KC78	IPE.08316	0	5.267	-44.133	1000	determined by crew using onboard GPS	WGS84	3273		Imaged at 10x magnification, broken open, imaged again on SEM	425-600	KC_4-6_081	Globorotalia tumida
IP.309194	KC78	IPE.08316	0	5.267	-44.133	1000	determined by crew using onboard GPS	WGS84	3273		Imaged at 10x magnification, broken open, imaged again on SEM	425-600	KC_4-6_082	Globigerinoides sacculifer
IP.309195	KC78	IPE.08316	0	5.267	-44.133	1000	determined by crew using onboard GPS	WGS84	3273		Imaged at 10x magnification, broken open, imaged again on SEM	425-600	KC_4-6_083	Sphaeroidinella dehiscens
IP.309196	KC78	IPE.08316	0	5.267	-44.133	1000	determined by crew using onboard GPS	WGS84	3273		Imaged at 10x magnification, broken open, imaged again on SEM	425-600	KC_4-6_084	Globorotalia menardii
IP.309197	KC78	IPE.08316	0	5.267	-44.133	1000	determined by crew using onboard GPS	WGS84	3273		Imaged at 10x magnification, broken open, imaged again on SEM	425-600	KC_4-6_085	Globigerinoides sacculifer
IP.309198	KC78	IPE.08316	0	5.267	-44.133	1000	determined by crew using onboard GPS	WGS84	3273		Imaged at 10x magnification, broken open, imaged again on SEM	425-600	KC_4-6_086	Globigerinoides sacculifer
IP.309199	KC78	IPE.08316	0	5.267	-44.133	1000	determined by crew using onboard GPS	WGS84	3273		Imaged at 10x magnification, broken open, imaged again on SEM	425-600	KC_4-6_087	Globigerinoides sacculifer
IP.309200	KC78	IPE.08316	0	5.267	-44.133	1000	determined by crew using onboard GPS	WGS84	3273		Imaged at 10x magnification, broken open, imaged again on SEM	425-600	KC_4-6_088	Globigerinoides sacculifer
IP.309201	KC78	IPE.08316	0	5.267	-44.133	1000	determined by crew using onboard GPS	WGS84	3273		Imaged at 10x magnification, broken open, imaged again on SEM	425-600	KC_4-6_089	Orbulina universa
IP.309202	KC78	IPE.08316	0	5.267	-44.133	1000	determined by crew using onboard GPS	WGS84	3273		Imaged at 10x magnification, broken open, imaged again on SEM	425-600	KC_4-6_009	Globorotalia menardii
IP.309203	KC78	IPE.08316	0	5.267	-44.133	1000	determined by crew using onboard GPS	WGS84	3273		Imaged at 10x magnification, broken open, imaged again on SEM	425-600	KC_4-6_090	Orbulina universa
IP.309204	KC78	IPE.08316	0	5.267	-44.133	1000	determined by crew using onboard GPS	WGS84	3273		Imaged at 10x magnification, broken open, imaged again on SEM	425-600	KC_4-6_091	Globigerinoides conglobatus
IP.309205	KC78	IPE.08316	0	5.267	-44.133	1000	determined by crew using onboard GPS	WGS84	3273		Imaged at 10x magnification, broken open, imaged again on SEM	425-600	KC_4-6_092	Sphaeroidinella dehiscens
IP.309206	KC78	IPE.08316	0	5.267	-44.133	1000	determined by crew using onboard GPS	WGS84	3273		Imaged at 10x magnification, broken open, imaged again on SEM	425-600	KC_4-6_093	Globigerinoides sacculifer
IP.309207	KC78	IPE.08316	0	5.267	-44.133	1000	determined by crew using onboard GPS	WGS84	3273		Imaged at 10x magnification, broken open, imaged again on SEM	425-600	KC_4-6_094	Globorotalia menardii
IP.309208	KC78	IPE.08316	0	5.267	-44.133	1000	determined by crew using onboard GPS	WGS84	3273		Imaged at 10x magnification, broken open, imaged again on SEM	425-600	KC_4-6_095	Globigerinoides conglobatus
IP.309209	KC78	IPE.08316	0	5.267	-44.133	1000	determined by crew using onboard GPS	WGS84	3273		Imaged at 10x magnification, broken open, imaged again on SEM	425-600	KC_4-6_096	Globorotalia menardii
IP.309210	KC78	IPE.08316	0	5.267	-44.133	1000	determined by crew using onboard GPS	WGS84	3273		Imaged at 10x magnification, broken open, imaged again on SEM	425-600	KC_4-6_097	Orbulina universa
IP.309211	KC78	IPE.08316	0	5.267	-44.133	1000	determined by crew using onboard GPS	WGS84	3273		Imaged at 10x magnification, broken open, imaged again on SEM	425-600	KC_4-6_098	Globigerinoides sacculifer
IP.309212	KC78	IPE.08316	0	5.267	-44.133	1000	determined by crew using onboard GPS	WGS84	3273		Imaged at 10x magnification, broken open, imaged again on SEM	425-600	KC_4-6_099	Globorotalia menardii
IP.309213	KC78	IPE.08316	0	5.267	-44.133	1000	determined by crew using onboard GPS	WGS84	3273		Imaged at 10x magnification, broken open, imaged again on SEM	600-710	KC_6-7_001	Globigerinoides sacculifer
IP.309214	KC78	IPE.08316	0	5.267	-44.133	1000	determined by crew using onboard GPS	WGS84	3273		Imaged at 10x magnification, broken open, imaged again on SEM	600-710	KC_6-7_010	Globorotalia menardii
IP.309215	KC78	IPE.08316	0	5.267	-44.133	1000	determined by crew using onboard GPS	WGS84	3273		Imaged at 10x magnification, broken open, imaged again on SEM	600-710	KC_6-7_100	Globorotalia menardii
IP.309216	KC78	IPE.08316	0	5.267	-44.133	1000	determined by crew using onboard GPS	WGS84	3273		Imaged at 10x magnification, broken open, imaged again on SEM	600-710	KC_6-7_101	Globigerinoides conglobatus
IP.309217	KC78	IPE.08316	0	5.267	-44.133	1000	determined by crew using onboard GPS	WGS84	3273		Imaged at 10x magnification, broken open, imaged again on SEM	600-710	KC_6-7_102	Globorotalia tumida
IP.309218	KC78	IPE.08316	0	5.267	-44.133	1000	determined by crew using onboard GPS	WGS84	3273		Imaged at 10x magnification, broken open, imaged again on SEM	600-710	KC_6-7_011	Globigerinoides sacculifer
IP.309219	KC78	IPE.08316	0	5.267	-44.133	1000	determined by crew using onboard GPS	WGS84	3273		Imaged at 10x magnification, broken open, imaged again on SEM	600-710	KC_6-7_012	Globigerinoides sacculifer
IP.309220	KC78	IPE.08316	0	5.267	-44.133	1000	determined by crew using onboard GPS	WGS84	3273		Imaged at 10x magnification, broken open, imaged again on SEM	600-710	KC_6-7_013	Globigerinoides sacculifer
IP.309221	KC78	IPE.08316	0	5.267	-44.133	1000	determined by crew using onboard GPS	WGS84	3273		Imaged at 10x magnification, broken open, imaged again on SEM	600-710	KC_6-7_014	Globorotalia menardii
IP.309222	KC78	IPE.08316	0	5.267	-44.133	1000	determined by crew using onboard GPS	WGS84	3273		Imaged at 10x magnification, broken open, imaged again on SEM	600-710	KC_6-7_015	Globigerinoides sacculifer
IP.309223	KC78	IPE.08316	0	5.267	-44.133	1000	determined by crew using onboard GPS	WGS84	3273		Imaged at 10x magnification, broken open, imaged again on SEM	600-710	KC_6-7_016	Globigerinoides sacculifer
IP.309224	KC78	IPE.08316	0	5.267	-44.133	1000	determined by crew using onboard GPS	WGS84	3273		Imaged at 10x magnification, broken open, imaged again on SEM	600-710	KC_6-7_017	Globigerinoides sacculifer
IP.309225	KC78	IPE.08316	0	5.267	-44.133	1000	determined by crew using onboard GPS	WGS84	3273		Imaged at 10x magnification, broken open, imaged again on SEM	600-710	KC_6-7_018	Globorotalia menardii
IP.309226	KC78	IPE.08316	0	5.267	-44.133	1000	determined by crew using onboard GPS	WGS84	3273		Imaged at 10x magnification, broken open, imaged again on SEM	600-710	KC_6-7_019	Globorotalia menardii
IP.309227	KC78	IPE.08316	0	5.267	-44.133	1000	determined by crew using onboard GPS	WGS84	3273		Imaged at 10x magnification, broken open, imaged again on SEM	600-710	KC_6-7_002	Globorotalia menardii
IP.309228	KC78	IPE.08316	0	5.267	-44.133	1000	determined by crew using onboard GPS	WGS84	3273		Imaged at 10x magnification, broken open, imaged again on SEM	600-710	KC_6-7_020	Globigerinoides sacculifer
IP.309229	KC78	IPE.08316	0	5.267	-44.133	1000	determined by crew using onboard GPS	WGS84	3273		Imaged at 10x magnification, broken open, imaged again on SEM	600-710	KC_6-7_021	Globorotalia menardii
IP.309230	KC78	IPE.08316	0	5.267	-44.133	1000	determined by crew using onboard GPS	WGS84	3273		Imaged at 10x magnification, broken open, imaged again on SEM	600-710	KC_6-7_022	Globorotalia menardii
IP.309231	KC78	IPE.08316	0	5.267	-44.133	1000	determined by crew using onboard GPS	WGS84	3273		Imaged at 10x magnification, broken open, imaged again on SEM	600-710	KC_6-7_023	Globorotalia menardii
IP.309232	KC78	IPE.08316	0	5.267	-44.133	1000	determined by crew using onboard GPS	WGS84	3273		Imaged at 10x magnification, broken open, imaged again on SEM	600-710	KC_6-7_024	Globigerinoides sacculifer
IP.309233	KC78	IPE.08316	0	5.267	-44.133	1000	determined by crew using onboard GPS	WGS84	3273		Imaged at 10x magnification, broken open, imaged again on SEM	600-710	KC_6-7_025	Globigerinoides sacculifer
IP.309234	KC78	IPE.08316	0	5.267	-44.133	1000	determined by crew using onboard GPS	WGS84	3273		Imaged at 10x magnification, broken open, imaged again on SEM	600-710	KC_6-7_026	Globorotalia menardii
IP.309235	KC78	IPE.08316	0	5.267	-44.133	1000	determined by crew using onboard GPS	WGS84	3273		Imaged at 10x magnification, broken open, imaged again on SEM	600-710	KC_6-7_027	Orbulina universa
IP.309236	KC78	IPE.08316	0	5.267	-44.133	1000	determined by crew using onboard GPS	WGS84	3273		Imaged at 10x magnification, broken open, imaged again on SEM	600-710	KC_6-7_028	Globorotalia menardii
IP.309237	KC78	IPE.08316	0	5.267	-44.133	1000	determined by crew using onboard GPS	WGS84	3273		Imaged at 10x magnification, broken open, imaged again on SEM	600-710	KC_6-7_029	Globigerinoides sacculifer
IP.309238	KC78	IPE.08316	0	5.267	-44.133	1000	determined by crew using onboard GPS	WGS84	3273		Imaged at 10x magnification, broken open, imaged again on SEM	600-710	KC_6-7_003	Globorotalia menardii
IP.309239	KC78	IPE.08316	0	5.267	-44.133	1000	determined by crew using onboard GPS	WGS84	3273		Imaged at 10x magnification, broken open, imaged again on SEM	600-710	KC_6-7_030	Globigerinoides conglobatus
IP.309240	KC78	IPE.08316	0	5.267	-44.133	1000	determined by crew using onboard GPS	WGS84	3273		Imaged at 10x magnification, broken open, imaged again on SEM	600-710	KC_6-7_031	Globigerinoides sacculifer
IP.309241	KC78	IPE.08316	0	5.267	-44.133	1000	determined by crew using onboard GPS	WGS84	3273		Imaged at 10x magnification, broken open, imaged again on SEM	600-710	KC_6-7_032	Orbulina universa
IP.309242	KC78	IPE.08316	0	5.267	-44.133	1000	determined by crew using onboard GPS	WGS84	3273		Imaged at 10x magnification, broken open, imaged again on SEM	600-710	KC_6-7_033	Globigerinoides sacculifer
IP.309243	KC78	IPE.08316	0	5.267	-44.133	1000	determined by crew using onboard GPS	WGS84	3273		Imaged at 10x magnification, broken open, imaged again on SEM	600-710	KC_6-7_034	Globigerinoides sacculifer
IP.309244	KC78	IPE.08316	0	5.267	-44.133	1000	determined by crew using onboard GPS	WGS84	3273		Imaged at 10x magnification, broken open, imaged again on SEM	600-710	KC_6-7_035	Globigerinoides sacculifer
IP.309245	KC78	IPE.08316	0	5.267	-44.133	1000	determined by crew using onboard GPS	WGS84	3273		Imaged at 10x magnification, broken open, imaged again on SEM	600-710	KC_6-7_036	Orbulina universa
IP.309246	KC78	IPE.08316	0	5.267	-44.133	1000	determined by crew using onboard GPS	WGS84	3273		Imaged at 10x magnification, broken open, imaged again on SEM	600-710	KC_6-7_037	Globorotalia menardii
IP.309247	KC78	IPE.08316	0	5.267	-44.133	1000	determined by crew using onboard GPS	WGS84	3273		Imaged at 10x magnification, broken open, imaged again on SEM	600-710	KC_6-7_038	Sphaeroidinella dehiscens
IP.309248	KC78	IPE.08316	0	5.267	-44.133	1000	determined by crew using onboard GPS	WGS84	3273		Imaged at 10x magnification, broken open, imaged again on SEM	600-710	KC_6-7_039	Globigerinoides sacculifer
IP.309249	KC78	IPE.08316	0	5.267	-44.133	1000	determined by crew using onboard GPS	WGS84	3273		Imaged at 10x magnification, broken open, imaged again on SEM	600-710	KC_6-7_004	Globigerinoides sacculifer
IP.309250	KC78	IPE.08316	0	5.267	-44.133	1000	determined by crew using onboard GPS	WGS84	3273		Imaged at 10x magnification, broken open, imaged again on SEM	600-710	KC_6-7_040	Globigerinoides conglobatus
IP.309251	KC78	IPE.08316	0	5.267	-44.133	1000	determined by crew using onboard GPS	WGS84	3273		Imaged at 10x magnification, broken open, imaged again on SEM	600-710	KC_6-7_041	Globigerinoides sacculifer
IP.309252	KC78	IPE.08316	0	5.267	-44.133	1000	determined by crew using onboard GPS	WGS84	3273		Imaged at 10x magnification, broken open, imaged again on SEM	600-710	KC_6-7_042	Orbulina universa
IP.309253	KC78	IPE.08316	0	5.267	-44.133	1000	determined by crew using onboard GPS	WGS84	3273		Imaged at 10x magnification, broken open, imaged again on SEM	600-710	KC_6-7_043	Orbulina universa
IP.309254	KC78	IPE.08316	0	5.267	-44.133	1000	determined by crew using onboard GPS	WGS84	3273		Imaged at 10x magnification, broken open, imaged again on SEM	600-710	KC_6-7_044	Globorotalia menardii
IP.309255	KC78	IPE.08316	0	5.267	-44.133	1000	determined by crew using onboard GPS	WGS84	3273		Imaged at 10x magnification, broken open, imaged again on SEM	600-710	KC_6-7_045	Globigerinoides sacculifer
IP.309256	KC78	IPE.08316	0	5.267	-44.133	1000	determined by crew using onboard GPS	WGS84	3273		Imaged at 10x magnification, broken open, imaged again on SEM	600-710	KC_6-7_046	Globigerinoides sacculifer
IP.309257	KC78	IPE.08316	0	5.267	-44.133	1000	determined by crew using onboard GPS	WGS84	3273		Imaged at 10x magnification, broken open, imaged again on SEM	600-710	KC_6-7_047	Globigerinoides sacculifer
IP.309258	KC78	IPE.08316	0	5.267	-44.133	1000	determined by crew using onboard GPS	WGS84	3273		Imaged at 10x magnification, broken open, imaged again on SEM	600-710	KC_6-7_048	Globorotalia menardii
IP.309259	KC78	IPE.08316	0	5.267	-44.133	1000	determined by crew using onboard GPS	WGS84	3273		Imaged at 10x magnification, broken open, imaged again on SEM	600-710	KC_6-7_049	Globigerinoides sacculifer
IP.309260	KC78	IPE.08316	0	5.267	-44.133	1000	determined by crew using onboard GPS	WGS84	3273		Imaged at 10x magnification, broken open, imaged again on SEM	600-710	KC_6-7_005	Globorotalia menardii
IP.309261	KC78	IPE.08316	0	5.267	-44.133	1000	determined by crew using onboard GPS	WGS84	3273		Imaged at 10x magnification, broken open, imaged again on SEM	600-710	KC_6-7_050	Globigerinoides sacculifer
IP.309262	KC78	IPE.08316	0	5.267	-44.133	1000	determined by crew using onboard GPS	WGS84	3273		Imaged at 10x magnification, broken open, imaged again on SEM	600-710	KC_6-7_051	Globorotalia menardii
IP.309263	KC78	IPE.08316	0	5.267	-44.133	1000	determined by crew using onboard GPS	WGS84	3273		Imaged at 10x magnification, broken open, imaged again on SEM	600-710	KC_6-7_052	Globorotalia menardii
IP.309264	KC78	IPE.08316	0	5.267	-44.133	1000	determined by crew using onboard GPS	WGS84	3273		Imaged at 10x magnification, broken open, imaged again on SEM	600-710	KC_6-7_053	Globigerinoides sacculifer
IP.309265	KC78	IPE.08316	0	5.267	-44.133	1000	determined by crew using onboard GPS	WGS84	3273		Imaged at 10x magnification, broken open, imaged again on SEM	600-710	KC_6-7_054	Orbulina universa
IP.309266	KC78	IPE.08316	0	5.267	-44.133	1000	determined by crew using onboard GPS	WGS84	3273		Imaged at 10x magnification, broken open, imaged again on SEM	600-710	KC_6-7_055	Orbulina universa
IP.309267	KC78	IPE.08316	0	5.267	-44.133	1000	determined by crew using onboard GPS	WGS84	3273		Imaged at 10x magnification, broken open, imaged again on SEM	600-710	KC_6-7_056	Globorotalia menardii
IP.309268	KC78	IPE.08316	0	5.267	-44.133	1000	determined by crew using onboard GPS	WGS84	3273		Imaged at 10x magnification, broken open, imaged again on SEM	600-710	KC_6-7_057	Globigerinoides conglobatus
IP.309269	KC78	IPE.08316	0	5.267	-44.133	1000	determined by crew using onboard GPS	WGS84	3273		Imaged at 10x magnification, broken open, imaged again on SEM	600-710	KC_6-7_058	Globorotalia menardii
IP.309270	KC78	IPE.08316	0	5.267	-44.133	1000	determined by crew using onboard GPS	WGS84	3273		Imaged at 10x magnification, broken open, imaged again on SEM	600-710	KC_6-7_059	Sphaeroidinella dehiscens
IP.309271	KC78	IPE.08316	0	5.267	-44.133	1000	determined by crew using onboard GPS	WGS84	3273		Imaged at 10x magnification, broken open, imaged again on SEM	600-710	KC_6-7_006	Globorotalia menardii
IP.309272	KC78	IPE.08316	0	5.267	-44.133	1000	determined by crew using onboard GPS	WGS84	3273		Imaged at 10x magnification, broken open, imaged again on SEM	600-710	KC_6-7_060	Orbulina universa
IP.309273	KC78	IPE.08316	0	5.267	-44.133	1000	determined by crew using onboard GPS	WGS84	3273		Imaged at 10x magnification, broken open, imaged again on SEM	600-710	KC_6-7_061	Orbulina universa
IP.309274	KC78	IPE.08316	0	5.267	-44.133	1000	determined by crew using onboard GPS	WGS84	3273		Imaged at 10x magnification, broken open, imaged again on SEM	600-710	KC_6-7_062	Globorotalia menardii
IP.309275	KC78	IPE.08316	0	5.267	-44.133	1000	determined by crew using onboard GPS	WGS84	3273		Imaged at 10x magnification, broken open, imaged again on SEM	600-710	KC_6-7_063	Globigerinoides sacculifer
IP.309276	KC78	IPE.08316	0	5.267	-44.133	1000	determined by crew using onboard GPS	WGS84	3273		Imaged at 10x magnification, broken open, imaged again on SEM	600-710	KC_6-7_064	Globorotalia menardii
IP.309277	KC78	IPE.08316	0	5.267	-44.133	1000	determined by crew using onboard GPS	WGS84	3273		Imaged at 10x magnification, broken open, imaged again on SEM	600-710	KC_6-7_065	Globorotalia menardii
IP.309278	KC78	IPE.08316	0	5.267	-44.133	1000	determined by crew using onboard GPS	WGS84	3273		Imaged at 10x magnification, broken open, imaged again on SEM	600-710	KC_6-7_066	Globigerinoides sacculifer
IP.309279	KC78	IPE.08316	0	5.267	-44.133	1000	determined by crew using onboard GPS	WGS84	3273		Imaged at 10x magnification, broken open, imaged again on SEM	600-710	KC_6-7_067	Orbulina universa
IP.309280	KC78	IPE.08316	0	5.267	-44.133	1000	determined by crew using onboard GPS	WGS84	3273		Imaged at 10x magnification, broken open, imaged again on SEM	600-710	KC_6-7_068	Globigerinoides conglobatus
IP.309281	KC78	IPE.08316	0	5.267	-44.133	1000	determined by crew using onboard GPS	WGS84	3273		Imaged at 10x magnification, broken open, imaged again on SEM	600-710	KC_6-7_069	Globorotalia menardii
IP.309282	KC78	IPE.08316	0	5.267	-44.133	1000	determined by crew using onboard GPS	WGS84	3273		Imaged at 10x magnification, broken open, imaged again on SEM	600-710	KC_6-7_007	Orbulina universa
IP.309283	KC78	IPE.08316	0	5.267	-44.133	1000	determined by crew using onboard GPS	WGS84	3273		Imaged at 10x magnification, broken open, imaged again on SEM	600-710	KC_6-7_070	Globorotalia menardii
IP.309284	KC78	IPE.08316	0	5.267	-44.133	1000	determined by crew using onboard GPS	WGS84	3273		Imaged at 10x magnification, broken open, imaged again on SEM	600-710	KC_6-7_071	Globorotalia menardii
IP.309285	KC78	IPE.08316	0	5.267	-44.133	1000	determined by crew using onboard GPS	WGS84	3273		Imaged at 10x magnification, broken open, imaged again on SEM	600-710	KC_6-7_072	Globorotalia menardii
IP.309286	KC78	IPE.08316	0	5.267	-44.133	1000	determined by crew using onboard GPS	WGS84	3273		Imaged at 10x magnification, broken open, imaged again on SEM	600-710	KC_6-7_073	Globigerinoides conglobatus
IP.309287	KC78	IPE.08316	0	5.267	-44.133	1000	determined by crew using onboard GPS	WGS84	3273		Imaged at 10x magnification, broken open, imaged again on SEM	600-710	KC_6-7_074	Globorotalia menardii
IP.309288	KC78	IPE.08316	0	5.267	-44.133	1000	determined by crew using onboard GPS	WGS84	3273		Imaged at 10x magnification, broken open, imaged again on SEM	600-710	KC_6-7_075	Globorotalia menardii
IP.309289	KC78	IPE.08316	0	5.267	-44.133	1000	determined by crew using onboard GPS	WGS84	3273		Imaged at 10x magnification, broken open, imaged again on SEM	600-710	KC_6-7_076	Globigerinoides sacculifer
IP.309290	KC78	IPE.08316	0	5.267	-44.133	1000	determined by crew using onboard GPS	WGS84	3273		Imaged at 10x magnification, broken open, imaged again on SEM	600-710	KC_6-7_077	Globigerinoides sacculifer
IP.309291	KC78	IPE.08316	0	5.267	-44.133	1000	determined by crew using onboard GPS	WGS84	3273		Imaged at 10x magnification, broken open, imaged again on SEM	600-710	KC_6-7_078	Globorotalia tumida
IP.309292	KC78	IPE.08316	0	5.267	-44.133	1000	determined by crew using onboard GPS	WGS84	3273		Imaged at 10x magnification, broken open, imaged again on SEM	600-710	KC_6-7_079	Globorotalia menardii
IP.309293	KC78	IPE.08316	0	5.267	-44.133	1000	determined by crew using onboard GPS	WGS84	3273		Imaged at 10x magnification, broken open, imaged again on SEM	600-710	KC_6-7_008	Globorotalia menardii
IP.309294	KC78	IPE.08316	0	5.267	-44.133	1000	determined by crew using onboard GPS	WGS84	3273		Imaged at 10x magnification, broken open, imaged again on SEM	600-710	KC_6-7_080	Orbulina universa
IP.309295	KC78	IPE.08316	0	5.267	-44.133	1000	determined by crew using onboard GPS	WGS84	3273		Imaged at 10x magnification, broken open, imaged again on SEM	600-710	KC_6-7_081	Globorotalia tumida
IP.309296	KC78	IPE.08316	0	5.267	-44.133	1000	determined by crew using onboard GPS	WGS84	3273		Imaged at 10x magnification, broken open, imaged again on SEM	600-710	KC_6-7_082	Globorotalia menardii
IP.309297	KC78	IPE.08316	0	5.267	-44.133	1000	determined by crew using onboard GPS	WGS84	3273		Imaged at 10x magnification, broken open, imaged again on SEM	600-710	KC_6-7_083	Orbulina universa
IP.309298	KC78	IPE.08316	0	5.267	-44.133	1000	determined by crew using onboard GPS	WGS84	3273		Imaged at 10x magnification, broken open, imaged again on SEM	600-710	KC_6-7_084	Globigerinoides sacculifer
IP.309299	KC78	IPE.08316	0	5.267	-44.133	1000	determined by crew using onboard GPS	WGS84	3273		Imaged at 10x magnification, broken open, imaged again on SEM	600-710	KC_6-7_085	Globigerinoides sacculifer
IP.309300	KC78	IPE.08316	0	5.267	-44.133	1000	determined by crew using onboard GPS	WGS84	3273		Imaged at 10x magnification, broken open, imaged again on SEM	600-710	KC_6-7_086	Globigerinoides conglobatus
IP.309301	KC78	IPE.08316	0	5.267	-44.133	1000	determined by crew using onboard GPS	WGS84	3273		Imaged at 10x magnification, broken open, imaged again on SEM	600-710	KC_6-7_087	Globigerinoides sacculifer
IP.309302	KC78	IPE.08316	0	5.267	-44.133	1000	determined by crew using onboard GPS	WGS84	3273		Imaged at 10x magnification, broken open, imaged again on SEM	600-710	KC_6-7_088	Globigerinoides sacculifer
IP.309303	KC78	IPE.08316	0	5.267	-44.133	1000	determined by crew using onboard GPS	WGS84	3273		Imaged at 10x magnification, broken open, imaged again on SEM	600-710	KC_6-7_089	Pulleniatina obliquiloculata
IP.309304	KC78	IPE.08316	0	5.267	-44.133	1000	determined by crew using onboard GPS	WGS84	3273		Imaged at 10x magnification, broken open, imaged again on SEM	600-710	KC_6-7_09	Globorotalia menardii
IP.309305	KC78	IPE.08316	0	5.267	-44.133	1000	determined by crew using onboard GPS	WGS84	3273		Imaged at 10x magnification, broken open, imaged again on SEM	600-710	KC_6-7_090	Globigerinoides sacculifer
IP.309306	KC78	IPE.08316	0	5.267	-44.133	1000	determined by crew using onboard GPS	WGS84	3273		Imaged at 10x magnification, broken open, imaged again on SEM	600-710	KC_6-7_091	Orbulina universa
IP.309307	KC78	IPE.08316	0	5.267	-44.133	1000	determined by crew using onboard GPS	WGS84	3273		Imaged at 10x magnification, broken open, imaged again on SEM	600-710	KC_6-7_092	Globorotalia menardii
IP.309308	KC78	IPE.08316	0	5.267	-44.133	1000	determined by crew using onboard GPS	WGS84	3273		Imaged at 10x magnification, broken open, imaged again on SEM	600-710	KC_6-7_093	Globorotalia menardii
IP.309309	KC78	IPE.08316	0	5.267	-44.133	1000	determined by crew using onboard GPS	WGS84	3273		Imaged at 10x magnification, broken open, imaged again on SEM	600-710	KC_6-7_094	Orbulina universa
IP.309310	KC78	IPE.08316	0	5.267	-44.133	1000	determined by crew using onboard GPS	WGS84	3273		Imaged at 10x magnification, broken open, imaged again on SEM	600-710	KC_6-7_095	Globigerinoides conglobatus
IP.309311	KC78	IPE.08316	0	5.267	-44.133	1000	determined by crew using onboard GPS	WGS84	3273		Imaged at 10x magnification, broken open, imaged again on SEM	600-710	KC_6-7_096	Orbulina universa
IP.309312	KC78	IPE.08316	0	5.267	-44.133	1000	determined by crew using onboard GPS	WGS84	3273		Imaged at 10x magnification, broken open, imaged again on SEM	600-710	KC_6-7_097	Orbulina universa
IP.309313	KC78	IPE.08316	0	5.267	-44.133	1000	determined by crew using onboard GPS	WGS84	3273		Imaged at 10x magnification, broken open, imaged again on SEM	600-710	KC_6-7_098	Globorotalia menardii
IP.309314	KC78	IPE.08316	0	5.267	-44.133	1000	determined by crew using onboard GPS	WGS84	3273		Imaged at 10x magnification, broken open, imaged again on SEM	600-710	KC_6-7_099	Globigerinoides sacculifer
IP.309315	KC78	IPE.08316	0	5.267	-44.133	1000	determined by crew using onboard GPS	WGS84	3273		Imaged at 10x magnification, broken open, imaged again on SEM	710-850	KC_7-8_001	Globigerinoides sacculifer
IP.309316	KC78	IPE.08316	0	5.267	-44.133	1000	determined by crew using onboard GPS	WGS84	3273		Imaged at 10x magnification, broken open, imaged again on SEM	710-850	KC_7-8_010	Globorotalia menardii
IP.309317	KC78	IPE.08316	0	5.267	-44.133	1000	determined by crew using onboard GPS	WGS84	3273		Imaged at 10x magnification, broken open, imaged again on SEM	710-850	KC_7-8_011	Orbulina universa
IP.309318	KC78	IPE.08316	0	5.267	-44.133	1000	determined by crew using onboard GPS	WGS84	3273		Imaged at 10x magnification, broken open, imaged again on SEM	710-850	KC_7-8_012	Globigerinoides sacculifer
IP.309319	KC78	IPE.08316	0	5.267	-44.133	1000	determined by crew using onboard GPS	WGS84	3273		Imaged at 10x magnification, broken open, imaged again on SEM	710-850	KC_7-8_013	Orbulina universa
IP.309320	KC78	IPE.08316	0	5.267	-44.133	1000	determined by crew using onboard GPS	WGS84	3273		Imaged at 10x magnification, broken open, imaged again on SEM	710-850	KC_7-8_014	Globigerinoides sacculifer
IP.309321	KC78	IPE.08316	0	5.267	-44.133	1000	determined by crew using onboard GPS	WGS84	3273		Imaged at 10x magnification, broken open, imaged again on SEM	710-850	KC_7-8_015	Globigerinoides sacculifer
IP.309322	KC78	IPE.08316	0	5.267	-44.133	1000	determined by crew using onboard GPS	WGS84	3273		Imaged at 10x magnification, broken open, imaged again on SEM	710-850	KC_7-8_016	Globigerinoides conglobatus
IP.309323	KC78	IPE.08316	0	5.267	-44.133	1000	determined by crew using onboard GPS	WGS84	3273		Imaged at 10x magnification, broken open, imaged again on SEM	710-850	KC_7-8_017	Globigerinoides conglobatus
IP.309324	KC78	IPE.08316	0	5.267	-44.133	1000	determined by crew using onboard GPS	WGS84	3273		Imaged at 10x magnification, broken open, imaged again on SEM	710-850	KC_7-8_018	Sphaeroidinella dehiscens
IP.309325	KC78	IPE.08316	0	5.267	-44.133	1000	determined by crew using onboard GPS	WGS84	3273		Imaged at 10x magnification, broken open, imaged again on SEM	710-850	KC_7-8_019	Orbulina universa
IP.309326	KC78	IPE.08316	0	5.267	-44.133	1000	determined by crew using onboard GPS	WGS84	3273		Imaged at 10x magnification, broken open, imaged again on SEM	710-850	KC_7-8_002	Globigerinoides sacculifer
IP.309327	KC78	IPE.08316	0	5.267	-44.133	1000	determined by crew using onboard GPS	WGS84	3273		Imaged at 10x magnification, broken open, imaged again on SEM	710-850	KC_7-8_020	Sphaeroidinella dehiscens
IP.309328	KC78	IPE.08316	0	5.267	-44.133	1000	determined by crew using onboard GPS	WGS84	3273		Imaged at 10x magnification, broken open, imaged again on SEM	710-850	KC_7-8_021	Orbulina universa
IP.309329	KC78	IPE.08316	0	5.267	-44.133	1000	determined by crew using onboard GPS	WGS84	3273		Imaged at 10x magnification, broken open, imaged again on SEM	710-850	KC_7-8_022	Globigerinoides sacculifer
IP.309330	KC78	IPE.08316	0	5.267	-44.133	1000	determined by crew using onboard GPS	WGS84	3273		Imaged at 10x magnification, broken open, imaged again on SEM	710-850	KC_7-8_023	Globigerinoides sacculifer
IP.309331	KC78	IPE.08316	0	5.267	-44.133	1000	determined by crew using onboard GPS	WGS84	3273		Imaged at 10x magnification, broken open, imaged again on SEM	710-850	KC_7-8_024	Globigerinoides sacculifer
IP.309332	KC78	IPE.08316	0	5.267	-44.133	1000	determined by crew using onboard GPS	WGS84	3273		Imaged at 10x magnification, broken open, imaged again on SEM	710-850	KC_7-8_025	Orbulina universa
IP.309333	KC78	IPE.08316	0	5.267	-44.133	1000	determined by crew using onboard GPS	WGS84	3273		Imaged at 10x magnification, broken open, imaged again on SEM	710-850	KC_7-8_026	Globorotalia menardii
IP.309334	KC78	IPE.08316	0	5.267	-44.133	1000	determined by crew using onboard GPS	WGS84	3273		Imaged at 10x magnification, broken open, imaged again on SEM	710-850	KC_7-8_027	Globorotalia menardii
IP.309335	KC78	IPE.08316	0	5.267	-44.133	1000	determined by crew using onboard GPS	WGS84	3273		Imaged at 10x magnification, broken open, imaged again on SEM	710-850	KC_7-8_028	Globigerinoides sacculifer
IP.309336	KC78	IPE.08316	0	5.267	-44.133	1000	determined by crew using onboard GPS	WGS84	3273		Imaged at 10x magnification, broken open, imaged again on SEM	710-850	KC_7-8_029	Globorotalia menardii
IP.309337	KC78	IPE.08316	0	5.267	-44.133	1000	determined by crew using onboard GPS	WGS84	3273		Imaged at 10x magnification, broken open, imaged again on SEM	710-850	KC_7-8_003	Globigerinoides sacculifer
IP.309338	KC78	IPE.08316	0	5.267	-44.133	1000	determined by crew using onboard GPS	WGS84	3273		Imaged at 10x magnification, broken open, imaged again on SEM	710-850	KC_7-8_030	Globorotalia menardii
IP.309339	KC78	IPE.08316	0	5.267	-44.133	1000	determined by crew using onboard GPS	WGS84	3273		Imaged at 10x magnification, broken open, imaged again on SEM	710-850	KC_7-8_031	Globorotalia menardii
IP.309340	KC78	IPE.08316	0	5.267	-44.133	1000	determined by crew using onboard GPS	WGS84	3273		Imaged at 10x magnification, broken open, imaged again on SEM	710-850	KC_7-8_032	Globorotalia menardii
IP.309341	KC78	IPE.08316	0	5.267	-44.133	1000	determined by crew using onboard GPS	WGS84	3273		Imaged at 10x magnification, broken open, imaged again on SEM	710-850	KC_7-8_033	Globorotalia menardii
IP.309342	KC78	IPE.08316	0	5.267	-44.133	1000	determined by crew using onboard GPS	WGS84	3273		Imaged at 10x magnification, broken open, imaged again on SEM	710-850	KC_7-8_034	Globigerinoides sacculifer
IP.309343	KC78	IPE.08316	0	5.267	-44.133	1000	determined by crew using onboard GPS	WGS84	3273		Imaged at 10x magnification, broken open, imaged again on SEM	710-850	KC_7-8_035	Globigerinoides sacculifer
IP.309344	KC78	IPE.08316	0	5.267	-44.133	1000	determined by crew using onboard GPS	WGS84	3273		Imaged at 10x magnification, broken open, imaged again on SEM	710-850	KC_7-8_036	Globigerinoides sacculifer
IP.309345	KC78	IPE.08316	0	5.267	-44.133	1000	determined by crew using onboard GPS	WGS84	3273		Imaged at 10x magnification, broken open, imaged again on SEM	710-850	KC_7-8_037	Globigerinoides conglobatus
IP.309346	KC78	IPE.08316	0	5.267	-44.133	1000	determined by crew using onboard GPS	WGS84	3273		Imaged at 10x magnification, broken open, imaged again on SEM	710-850	KC_7-8_038	Globigerinoides conglobatus
IP.309347	KC78	IPE.08316	0	5.267	-44.133	1000	determined by crew using onboard GPS	WGS84	3273		Imaged at 10x magnification, broken open, imaged again on SEM	710-850	KC_7-8_039	Globorotalia menardii
IP.309348	KC78	IPE.08316	0	5.267	-44.133	1000	determined by crew using onboard GPS	WGS84	3273		Imaged at 10x magnification, broken open, imaged again on SEM	710-850	KC_7-8_004	Globigerinoides sacculifer
IP.309349	KC78	IPE.08316	0	5.267	-44.133	1000	determined by crew using onboard GPS	WGS84	3273		Imaged at 10x magnification, broken open, imaged again on SEM	710-850	KC_7-8_040	Globorotalia menardii
IP.309350	KC78	IPE.08316	0	5.267	-44.133	1000	determined by crew using onboard GPS	WGS84	3273		Imaged at 10x magnification, broken open, imaged again on SEM	710-850	KC_7-8_041	Globorotalia menardii
IP.309351	KC78	IPE.08316	0	5.267	-44.133	1000	determined by crew using onboard GPS	WGS84	3273		Imaged at 10x magnification, broken open, imaged again on SEM	710-850	KC_7-8_042	Globorotalia menardii
IP.309352	KC78	IPE.08316	0	5.267	-44.133	1000	determined by crew using onboard GPS	WGS84	3273		Imaged at 10x magnification, broken open, imaged again on SEM	710-850	KC_7-8_043	Globigerinoides sacculifer
IP.309353	KC78	IPE.08316	0	5.267	-44.133	1000	determined by crew using onboard GPS	WGS84	3273		Imaged at 10x magnification, broken open, imaged again on SEM	710-850	KC_7-8_044	Globorotalia menardii
IP.309354	KC78	IPE.08316	0	5.267	-44.133	1000	determined by crew using onboard GPS	WGS84	3273		Imaged at 10x magnification, broken open, imaged again on SEM	710-850	KC_7-8_045	Globigerinoides sacculifer
IP.309355	KC78	IPE.08316	0	5.267	-44.133	1000	determined by crew using onboard GPS	WGS84	3273		Imaged at 10x magnification, broken open, imaged again on SEM	710-850	KC_7-8_046	Globorotalia menardii
IP.309356	KC78	IPE.08316	0	5.267	-44.133	1000	determined by crew using onboard GPS	WGS84	3273		Imaged at 10x magnification, broken open, imaged again on SEM	710-850	KC_7-8_047	Globigerinoides sacculifer
IP.309357	KC78	IPE.08316	0	5.267	-44.133	1000	determined by crew using onboard GPS	WGS84	3273		Imaged at 10x magnification, broken open, imaged again on SEM	710-850	KC_7-8_048	Globigerinoides sacculifer
IP.309358	KC78	IPE.08316	0	5.267	-44.133	1000	determined by crew using onboard GPS	WGS84	3273		Imaged at 10x magnification, broken open, imaged again on SEM	710-850	KC_7-8_049	Globorotalia menardii
IP.309359	KC78	IPE.08316	0	5.267	-44.133	1000	determined by crew using onboard GPS	WGS84	3273		Imaged at 10x magnification, broken open, imaged again on SEM	710-850	KC_7-8_005	Globigerinoides sacculifer
IP.309360	KC78	IPE.08316	0	5.267	-44.133	1000	determined by crew using onboard GPS	WGS84	3273		Imaged at 10x magnification, broken open, imaged again on SEM	710-850	KC_7-8_050	Globorotalia menardii
IP.309361	KC78	IPE.08316	0	5.267	-44.133	1000	determined by crew using onboard GPS	WGS84	3273		Imaged at 10x magnification, broken open, imaged again on SEM	710-850	KC_7-8_051	Globorotalia menardii
IP.309362	KC78	IPE.08316	0	5.267	-44.133	1000	determined by crew using onboard GPS	WGS84	3273		Imaged at 10x magnification, broken open, imaged again on SEM	710-850	KC_7-8_052	Globigerinoides conglobatus
IP.309363	KC78	IPE.08316	0	5.267	-44.133	1000	determined by crew using onboard GPS	WGS84	3273		Imaged at 10x magnification, broken open, imaged again on SEM	710-850	KC_7-8_053	Globorotalia menardii
IP.309364	KC78	IPE.08316	0	5.267	-44.133	1000	determined by crew using onboard GPS	WGS84	3273		Imaged at 10x magnification, broken open, imaged again on SEM	710-850	KC_7-8_054	Orbulina universa
IP.309365	KC78	IPE.08316	0	5.267	-44.133	1000	determined by crew using onboard GPS	WGS84	3273		Imaged at 10x magnification, broken open, imaged again on SEM	710-850	KC_7-8_055	Orbulina universa
IP.309366	KC78	IPE.08316	0	5.267	-44.133	1000	determined by crew using onboard GPS	WGS84	3273		Imaged at 10x magnification, broken open, imaged again on SEM	710-850	KC_7-8_056	Orbulina universa
IP.309367	KC78	IPE.08316	0	5.267	-44.133	1000	determined by crew using onboard GPS	WGS84	3273		Imaged at 10x magnification, broken open, imaged again on SEM	710-850	KC_7-8_057	Orbulina universa
IP.309368	KC78	IPE.08316	0	5.267	-44.133	1000	determined by crew using onboard GPS	WGS84	3273		Imaged at 10x magnification, broken open, imaged again on SEM	710-850	KC_7-8_058	Orbulina universa
IP.309369	KC78	IPE.08316	0	5.267	-44.133	1000	determined by crew using onboard GPS	WGS84	3273		Imaged at 10x magnification, broken open, imaged again on SEM	710-850	KC_7-8_059	Orbulina universa
IP.309370	KC78	IPE.08316	0	5.267	-44.133	1000	determined by crew using onboard GPS	WGS84	3273		Imaged at 10x magnification, broken open, imaged again on SEM	710-850	KC_7-8_006	Globorotalia menardii
IP.309371	KC78	IPE.08316	0	5.267	-44.133	1000	determined by crew using onboard GPS	WGS84	3273		Imaged at 10x magnification, broken open, imaged again on SEM	710-850	KC_7-8_060	Orbulina universa
IP.309372	KC78	IPE.08316	0	5.267	-44.133	1000	determined by crew using onboard GPS	WGS84	3273		Imaged at 10x magnification, broken open, imaged again on SEM	710-850	KC_7-8_061	Globorotalia menardii
IP.309373	KC78	IPE.08316	0	5.267	-44.133	1000	determined by crew using onboard GPS	WGS84	3273		Imaged at 10x magnification, broken open, imaged again on SEM	710-850	KC_7-8_062	Globigerinoides conglobatus
IP.309374	KC78	IPE.08316	0	5.267	-44.133	1000	determined by crew using onboard GPS	WGS84	3273		Imaged at 10x magnification, broken open, imaged again on SEM	710-850	KC_7-8_063	Globorotalia menardii
IP.309375	KC78	IPE.08316	0	5.267	-44.133	1000	determined by crew using onboard GPS	WGS84	3273		Imaged at 10x magnification, broken open, imaged again on SEM	710-850	KC_7-8_064	Orbulina universa
IP.309376	KC78	IPE.08316	0	5.267	-44.133	1000	determined by crew using onboard GPS	WGS84	3273		Imaged at 10x magnification, broken open, imaged again on SEM	710-850	KC_7-8_065	Globigerinoides conglobatus
IP.309377	KC78	IPE.08316	0	5.267	-44.133	1000	determined by crew using onboard GPS	WGS84	3273		Imaged at 10x magnification, broken open, imaged again on SEM	710-850	KC_7-8_066	Globigerinoides sacculifer
IP.309378	KC78	IPE.08316	0	5.267	-44.133	1000	determined by crew using onboard GPS	WGS84	3273		Imaged at 10x magnification, broken open, imaged again on SEM	710-850	KC_7-8_067	Orbulina universa
IP.309379	KC78	IPE.08316	0	5.267	-44.133	1000	determined by crew using onboard GPS	WGS84	3273		Imaged at 10x magnification, broken open, imaged again on SEM	710-850	KC_7-8_068	Sphaeroidinella dehiscens
IP.309380	KC78	IPE.08316	0	5.267	-44.133	1000	determined by crew using onboard GPS	WGS84	3273		Imaged at 10x magnification, broken open, imaged again on SEM	710-850	KC_7-8_069	Orbulina universa
IP.309381	KC78	IPE.08316	0	5.267	-44.133	1000	determined by crew using onboard GPS	WGS84	3273		Imaged at 10x magnification, broken open, imaged again on SEM	710-850	KC_7-8_007	Globigerinoides sacculifer
IP.309382	KC78	IPE.08316	0	5.267	-44.133	1000	determined by crew using onboard GPS	WGS84	3273		Imaged at 10x magnification, broken open, imaged again on SEM	710-850	KC_7-8_070	Orbulina universa
IP.309383	KC78	IPE.08316	0	5.267	-44.133	1000	determined by crew using onboard GPS	WGS84	3273		Imaged at 10x magnification, broken open, imaged again on SEM	710-850	KC_7-8_071	Globigerinoides sacculifer
IP.309384	KC78	IPE.08316	0	5.267	-44.133	1000	determined by crew using onboard GPS	WGS84	3273		Imaged at 10x magnification, broken open, imaged again on SEM	710-850	KC_7-8_072	Globigerinoides sacculifer
IP.309385	KC78	IPE.08316	0	5.267	-44.133	1000	determined by crew using onboard GPS	WGS84	3273		Imaged at 10x magnification, broken open, imaged again on SEM	710-850	KC_7-8_073	Globigerinoides sacculifer
IP.309386	KC78	IPE.08316	0	5.267	-44.133	1000	determined by crew using onboard GPS	WGS84	3273		Imaged at 10x magnification, broken open, imaged again on SEM	710-850	KC_7-8_074	Sphaeroidinella dehiscens
IP.309387	KC78	IPE.08316	0	5.267	-44.133	1000	determined by crew using onboard GPS	WGS84	3273		Imaged at 10x magnification, broken open, imaged again on SEM	710-850	KC_7-8_075	Globorotalia menardii
IP.309388	KC78	IPE.08316	0	5.267	-44.133	1000	determined by crew using onboard GPS	WGS84	3273		Imaged at 10x magnification, broken open, imaged again on SEM	710-850	KC_7-8_076	Sphaeroidinella dehiscens
IP.309389	KC78	IPE.08316	0	5.267	-44.133	1000	determined by crew using onboard GPS	WGS84	3273		Imaged at 10x magnification, broken open, imaged again on SEM	710-850	KC_7-8_077	Globorotalia menardii
IP.309390	KC78	IPE.08316	0	5.267	-44.133	1000	determined by crew using onboard GPS	WGS84	3273		Imaged at 10x magnification, broken open, imaged again on SEM	710-850	KC_7-8_078	Sphaeroidinella dehiscens
IP.309391	KC78	IPE.08316	0	5.267	-44.133	1000	determined by crew using onboard GPS	WGS84	3273		Imaged at 10x magnification, broken open, imaged again on SEM	710-850	KC_7-8_079	Orbulina universa
IP.309392	KC78	IPE.08316	0	5.267	-44.133	1000	determined by crew using onboard GPS	WGS84	3273		Imaged at 10x magnification, broken open, imaged again on SEM	710-850	KC_7-8_008	Sphaeroidinella dehiscens
IP.309393	KC78	IPE.08316	0	5.267	-44.133	1000	determined by crew using onboard GPS	WGS84	3273		Imaged at 10x magnification, broken open, imaged again on SEM	710-850	KC_7-8_080	Globigerinoides sacculifer
IP.309394	KC78	IPE.08316	0	5.267	-44.133	1000	determined by crew using onboard GPS	WGS84	3273		Imaged at 10x magnification, broken open, imaged again on SEM	710-850	KC_7-8_081	Sphaeroidinella dehiscens
IP.309395	KC78	IPE.08316	0	5.267	-44.133	1000	determined by crew using onboard GPS	WGS84	3273		Imaged at 10x magnification, broken open, imaged again on SEM	710-850	KC_7-8_082	Orbulina universa
IP.309396	KC78	IPE.08316	0	5.267	-44.133	1000	determined by crew using onboard GPS	WGS84	3273		Imaged at 10x magnification, broken open, imaged again on SEM	710-850	KC_7-8_083	Orbulina universa
IP.309397	KC78	IPE.08316	0	5.267	-44.133	1000	determined by crew using onboard GPS	WGS84	3273		Imaged at 10x magnification, broken open, imaged again on SEM	710-850	KC_7-8_084	Globigerinoides conglobatus
IP.309398	KC78	IPE.08316	0	5.267	-44.133	1000	determined by crew using onboard GPS	WGS84	3273		Imaged at 10x magnification, broken open, imaged again on SEM	710-850	KC_7-8_085	Globorotalia menardii
IP.309399	KC78	IPE.08316	0	5.267	-44.133	1000	determined by crew using onboard GPS	WGS84	3273		Imaged at 10x magnification, broken open, imaged again on SEM	710-850	KC_7-8_086	Orbulina universa
IP.309400	KC78	IPE.08316	0	5.267	-44.133	1000	determined by crew using onboard GPS	WGS84	3273		Imaged at 10x magnification, broken open, imaged again on SEM	710-850	KC_7-8_087	Globigerinoides conglobatus
IP.309401	KC78	IPE.08316	0	5.267	-44.133	1000	determined by crew using onboard GPS	WGS84	3273		Imaged at 10x magnification, broken open, imaged again on SEM	710-850	KC_7-8_088	Globorotalia menardii
IP.309402	KC78	IPE.08316	0	5.267	-44.133	1000	determined by crew using onboard GPS	WGS84	3273		Imaged at 10x magnification, broken open, imaged again on SEM	710-850	KC_7-8_089	Orbulina universa
IP.309403	KC78	IPE.08316	0	5.267	-44.133	1000	determined by crew using onboard GPS	WGS84	3273		Imaged at 10x magnification, broken open, imaged again on SEM	710-850	KC_7-8_009	Orbulina universa
IP.309404	KC78	IPE.08316	0	5.267	-44.133	1000	determined by crew using onboard GPS	WGS84	3273		Imaged at 10x magnification, broken open, imaged again on SEM	710-850	KC_7-8_090	Orbulina universa
IP.309405	KC78	IPE.08316	0	5.267	-44.133	1000	determined by crew using onboard GPS	WGS84	3273		Imaged at 10x magnification, broken open, imaged again on SEM	710-850	KC_7-8_091	Orbulina universa
IP.309406	KC78	IPE.08316	0	5.267	-44.133	1000	determined by crew using onboard GPS	WGS84	3273		Imaged at 10x magnification, broken open, imaged again on SEM	710-850	KC_7-8_092	Globigerinoides sacculifer
IP.309407	KC78	IPE.08316	0	5.267	-44.133	1000	determined by crew using onboard GPS	WGS84	3273		Imaged at 10x magnification, broken open, imaged again on SEM	710-850	KC_7-8_093	Globigerinoides sacculifer
IP.309408	KC78	IPE.08316	0	5.267	-44.133	1000	determined by crew using onboard GPS	WGS84	3273		Imaged at 10x magnification, broken open, imaged again on SEM	710-850	KC_7-8_094	Orbulina universa
IP.309409	KC78	IPE.08316	0	5.267	-44.133	1000	determined by crew using onboard GPS	WGS84	3273		Imaged at 10x magnification, broken open, imaged again on SEM	710-850	KC_7-8_095	Orbulina universa
IP.309410	KC78	IPE.08316	0	5.267	-44.133	1000	determined by crew using onboard GPS	WGS84	3273		Imaged at 10x magnification, broken open, imaged again on SEM	710-850	KC_7-8_096	Orbulina universa
IP.309411	KC78	IPE.08316	0	5.267	-44.133	1000	determined by crew using onboard GPS	WGS84	3273		Imaged at 10x magnification, broken open, imaged again on SEM	710-850	KC_7-8_097	Sphaeroidinella dehiscens
IP.309412	KC78	IPE.08316	0	5.267	-44.133	1000	determined by crew using onboard GPS	WGS84	3273		Imaged at 10x magnification, broken open, imaged again on SEM	710-850	KC_7-8_098	Orbulina universa
IP.309413	KC78	IPE.08316	0	5.267	-44.133	1000	determined by crew using onboard GPS	WGS84	3273		Imaged at 10x magnification, broken open, imaged again on SEM	710-850	KC_7-8_099	Orbulina universa
IP.309414	VM20-248	IPE.08379	0.01	33.5	-64.4	1000	determined by crew using onboard GPS	WGS84	1575		Imaged at 10x magnification, broken open, imaged again on SEM	250-300	VM_2-3_001	Globigerinoides ruber
IP.309415	VM20-248	IPE.08379	0.01	33.5	-64.4	1000	determined by crew using onboard GPS	WGS84	1575		Imaged at 10x magnification, broken open, imaged again on SEM	250-300	VM_2-3_010	Globorotalia inflata
IP.309416	VM20-248	IPE.08379	0.01	33.5	-64.4	1000	determined by crew using onboard GPS	WGS84	1575		Imaged at 10x magnification, broken open, imaged again on SEM	250-300	VM_2-3_011	Globigerinoides ruber
IP.309417	VM20-248	IPE.08379	0.01	33.5	-64.4	1000	determined by crew using onboard GPS	WGS84	1575		Imaged at 10x magnification, broken open, imaged again on SEM	250-300	VM_2-3_012	Globorotalia truncatulinoides
IP.309418	VM20-248	IPE.08379	0.01	33.5	-64.4	1000	determined by crew using onboard GPS	WGS84	1575		Imaged at 10x magnification, broken open, imaged again on SEM	250-300	VM_2-3_013	Globigerinoides ruber
IP.309419	VM20-248	IPE.08379	0.01	33.5	-64.4	1000	determined by crew using onboard GPS	WGS84	1575		Imaged at 10x magnification, broken open, imaged again on SEM	250-300	VM_2-3_014	Unknown
IP.309420	VM20-248	IPE.08379	0.01	33.5	-64.4	1000	determined by crew using onboard GPS	WGS84	1575		Imaged at 10x magnification, broken open, imaged again on SEM	250-300	VM_2-3_015	Unknown
IP.309421	VM20-248	IPE.08379	0.01	33.5	-64.4	1000	determined by crew using onboard GPS	WGS84	1575		Imaged at 10x magnification, broken open, imaged again on SEM	250-300	VM_2-3_016	Globigerinoides sacculifer
IP.309422	VM20-248	IPE.08379	0.01	33.5	-64.4	1000	determined by crew using onboard GPS	WGS84	1575		Imaged at 10x magnification, broken open, imaged again on SEM	250-300	VM_2-3_017	Globorotalia truncatulinoides
IP.309423	VM20-248	IPE.08379	0.01	33.5	-64.4	1000	determined by crew using onboard GPS	WGS84	1575		Imaged at 10x magnification, broken open, imaged again on SEM	250-300	VM_2-3_018	Globorotalia truncatulinoides
IP.309424	VM20-248	IPE.08379	0.01	33.5	-64.4	1000	determined by crew using onboard GPS	WGS84	1575		Imaged at 10x magnification, broken open, imaged again on SEM	250-300	VM_2-3_019	Globigerinoides sacculifer
IP.309425	VM20-248	IPE.08379	0.01	33.5	-64.4	1000	determined by crew using onboard GPS	WGS84	1575		Imaged at 10x magnification, broken open, imaged again on SEM	250-300	VM_2-3_002	Globigerinoides ruber
IP.309426	VM20-248	IPE.08379	0.01	33.5	-64.4	1000	determined by crew using onboard GPS	WGS84	1575		Imaged at 10x magnification, broken open, imaged again on SEM	250-300	VM_2-3_20	Unknown
IP.309427	VM20-248	IPE.08379	0.01	33.5	-64.4	1000	determined by crew using onboard GPS	WGS84	1575		Imaged at 10x magnification, broken open, imaged again on SEM	250-300	VM_2-3_21	Globigerinoides ruber
IP.309428	VM20-248	IPE.08379	0.01	33.5	-64.4	1000	determined by crew using onboard GPS	WGS84	1575		Imaged at 10x magnification, broken open, imaged again on SEM	250-300	VM_2-3_22	Unknown
IP.309429	VM20-248	IPE.08379	0.01	33.5	-64.4	1000	determined by crew using onboard GPS	WGS84	1575		Imaged at 10x magnification, broken open, imaged again on SEM	250-300	VM_2-3_23	Globigerinoides ruber
IP.309430	VM20-248	IPE.08379	0.01	33.5	-64.4	1000	determined by crew using onboard GPS	WGS84	1575		Imaged at 10x magnification, broken open, imaged again on SEM	250-300	VM_2-3_24	Globigerinoides ruber
IP.309431	VM20-248	IPE.08379	0.01	33.5	-64.4	1000	determined by crew using onboard GPS	WGS84	1575		Imaged at 10x magnification, broken open, imaged again on SEM	250-300	VM_2-3_25	Globigerinoides ruber
IP.309432	VM20-248	IPE.08379	0.01	33.5	-64.4	1000	determined by crew using onboard GPS	WGS84	1575		Imaged at 10x magnification, broken open, imaged again on SEM	250-300	VM_2-3_26	Unknown
IP.309433	VM20-248	IPE.08379	0.01	33.5	-64.4	1000	determined by crew using onboard GPS	WGS84	1575		Imaged at 10x magnification, broken open, imaged again on SEM	250-300	VM_2-3_27	Globigerinoides ruber
IP.309434	VM20-248	IPE.08379	0.01	33.5	-64.4	1000	determined by crew using onboard GPS	WGS84	1575		Imaged at 10x magnification, broken open, imaged again on SEM	250-300	VM_2-3_28	Globorotalia inflata
IP.309435	VM20-248	IPE.08379	0.01	33.5	-64.4	1000	determined by crew using onboard GPS	WGS84	1575		Imaged at 10x magnification, broken open, imaged again on SEM	250-300	VM_2-3_29	Globorotalia inflata
IP.309436	VM20-248	IPE.08379	0.01	33.5	-64.4	1000	determined by crew using onboard GPS	WGS84	1575		Imaged at 10x magnification, broken open, imaged again on SEM	250-300	VM_2-3_3	Globorotalia hirsuta
IP.309437	VM20-248	IPE.08379	0.01	33.5	-64.4	1000	determined by crew using onboard GPS	WGS84	1575		Imaged at 10x magnification, broken open, imaged again on SEM	250-300	VM_2-3_30	Globigerinoides ruber
IP.309438	VM20-248	IPE.08379	0.01	33.5	-64.4	1000	determined by crew using onboard GPS	WGS84	1575		Imaged at 10x magnification, broken open, imaged again on SEM	250-300	VM_2-3_031	Globorotalia truncatulinoides
IP.309439	VM20-248	IPE.08379	0.01	33.5	-64.4	1000	determined by crew using onboard GPS	WGS84	1575		Imaged at 10x magnification, broken open, imaged again on SEM	250-300	VM_2-3_032	Unknown
IP.309440	VM20-248	IPE.08379	0.01	33.5	-64.4	1000	determined by crew using onboard GPS	WGS84	1575		Imaged at 10x magnification, broken open, imaged again on SEM	250-300	VM_2-3_033	Unknown
IP.309441	VM20-248	IPE.08379	0.01	33.5	-64.4	1000	determined by crew using onboard GPS	WGS84	1575		Imaged at 10x magnification, broken open, imaged again on SEM	250-300	VM_2-3_034	Globigerinoides ruber
IP.309442	VM20-248	IPE.08379	0.01	33.5	-64.4	1000	determined by crew using onboard GPS	WGS84	1575		Imaged at 10x magnification, broken open, imaged again on SEM	250-300	VM_2-3_035	Globigerinoides ruber
IP.309443	VM20-248	IPE.08379	0.01	33.5	-64.4	1000	determined by crew using onboard GPS	WGS84	1575		Imaged at 10x magnification, broken open, imaged again on SEM	250-300	VM_2-3_036	Globigerinoides ruber
IP.309444	VM20-248	IPE.08379	0.01	33.5	-64.4	1000	determined by crew using onboard GPS	WGS84	1575		Imaged at 10x magnification, broken open, imaged again on SEM	250-300	VM_2-3_037	Unknown
IP.309445	VM20-248	IPE.08379	0.01	33.5	-64.4	1000	determined by crew using onboard GPS	WGS84	1575		Imaged at 10x magnification, broken open, imaged again on SEM	250-300	VM_2-3_038	Globigerinoides sacculifer
IP.309446	VM20-248	IPE.08379	0.01	33.5	-64.4	1000	determined by crew using onboard GPS	WGS84	1575		Imaged at 10x magnification, broken open, imaged again on SEM	250-300	VM_2-3_039	Globigerinoides sacculifer
IP.309447	VM20-248	IPE.08379	0.01	33.5	-64.4	1000	determined by crew using onboard GPS	WGS84	1575		Imaged at 10x magnification, broken open, imaged again on SEM	250-300	VM_2-3_004	Unknown
IP.309448	VM20-248	IPE.08379	0.01	33.5	-64.4	1000	determined by crew using onboard GPS	WGS84	1575		Imaged at 10x magnification, broken open, imaged again on SEM	250-300	VM_2-3_040	Unknown
IP.309449	VM20-248	IPE.08379	0.01	33.5	-64.4	1000	determined by crew using onboard GPS	WGS84	1575		Imaged at 10x magnification, broken open, imaged again on SEM	250-300	VM_2-3_041	Unknown
IP.309450	VM20-248	IPE.08379	0.01	33.5	-64.4	1000	determined by crew using onboard GPS	WGS84	1575		Imaged at 10x magnification, broken open, imaged again on SEM	250-300	VM_2-3_042	Globigerinoides ruber
IP.309451	VM20-248	IPE.08379	0.01	33.5	-64.4	1000	determined by crew using onboard GPS	WGS84	1575		Imaged at 10x magnification, broken open, imaged again on SEM	250-300	VM_2-3_043	Globigerinoides sacculifer
IP.309452	VM20-248	IPE.08379	0.01	33.5	-64.4	1000	determined by crew using onboard GPS	WGS84	1575		Imaged at 10x magnification, broken open, imaged again on SEM	250-300	VM_2-3_044	Unknown
IP.309453	VM20-248	IPE.08379	0.01	33.5	-64.4	1000	determined by crew using onboard GPS	WGS84	1575		Imaged at 10x magnification, broken open, imaged again on SEM	250-300	VM_2-3_045	Globigerinoides ruber
IP.309454	VM20-248	IPE.08379	0.01	33.5	-64.4	1000	determined by crew using onboard GPS	WGS84	1575		Imaged at 10x magnification, broken open, imaged again on SEM	250-300	VM_2-3_046	Globigerinella siphonifera
IP.309455	VM20-248	IPE.08379	0.01	33.5	-64.4	1000	determined by crew using onboard GPS	WGS84	1575		Imaged at 10x magnification, broken open, imaged again on SEM	250-300	VM_2-3_047	Unknown
IP.309456	VM20-248	IPE.08379	0.01	33.5	-64.4	1000	determined by crew using onboard GPS	WGS84	1575		Imaged at 10x magnification, broken open, imaged again on SEM	250-300	VM_2-3_048	Globigerinella siphonifera
IP.309457	VM20-248	IPE.08379	0.01	33.5	-64.4	1000	determined by crew using onboard GPS	WGS84	1575		Imaged at 10x magnification, broken open, imaged again on SEM	250-300	VM_2-3_049	Globigerinella siphonifera
IP.309458	VM20-248	IPE.08379	0.01	33.5	-64.4	1000	determined by crew using onboard GPS	WGS84	1575		Imaged at 10x magnification, broken open, imaged again on SEM	250-300	VM_2-3_005	Unknown
IP.309459	VM20-248	IPE.08379	0.01	33.5	-64.4	1000	determined by crew using onboard GPS	WGS84	1575		Imaged at 10x magnification, broken open, imaged again on SEM	250-300	VM_2-3_050	Globigerinoides ruber
IP.309460	VM20-248	IPE.08379	0.01	33.5	-64.4	1000	determined by crew using onboard GPS	WGS84	1575		Imaged at 10x magnification, broken open, imaged again on SEM	250-300	VM_2-3_051	Globigerinoides ruber
IP.309461	VM20-248	IPE.08379	0.01	33.5	-64.4	1000	determined by crew using onboard GPS	WGS84	1575		Imaged at 10x magnification, broken open, imaged again on SEM	250-300	VM_2-3_052	Globigerinoides ruber
IP.309462	VM20-248	IPE.08379	0.01	33.5	-64.4	1000	determined by crew using onboard GPS	WGS84	1575		Imaged at 10x magnification, broken open, imaged again on SEM	250-300	VM_2-3_053	Unknown
IP.309463	VM20-248	IPE.08379	0.01	33.5	-64.4	1000	determined by crew using onboard GPS	WGS84	1575		Imaged at 10x magnification, broken open, imaged again on SEM	250-300	VM_2-3_054	Unknown
IP.309464	VM20-248	IPE.08379	0.01	33.5	-64.4	1000	determined by crew using onboard GPS	WGS84	1575		Imaged at 10x magnification, broken open, imaged again on SEM	250-300	VM_2-3_055	Unknown
IP.309465	VM20-248	IPE.08379	0.01	33.5	-64.4	1000	determined by crew using onboard GPS	WGS84	1575		Imaged at 10x magnification, broken open, imaged again on SEM	250-300	VM_2-3_056	Globigerinoides ruber
IP.309466	VM20-248	IPE.08379	0.01	33.5	-64.4	1000	determined by crew using onboard GPS	WGS84	1575		Imaged at 10x magnification, broken open, imaged again on SEM	250-300	VM_2-3_057	Unknown
IP.309467	VM20-248	IPE.08379	0.01	33.5	-64.4	1000	determined by crew using onboard GPS	WGS84	1575		Imaged at 10x magnification, broken open, imaged again on SEM	250-300	VM_2-3_058	Globigerinoides ruber
IP.309468	VM20-248	IPE.08379	0.01	33.5	-64.4	1000	determined by crew using onboard GPS	WGS84	1575		Imaged at 10x magnification, broken open, imaged again on SEM	250-300	VM_2-3_059	Globorotalia inflata
IP.309469	VM20-248	IPE.08379	0.01	33.5	-64.4	1000	determined by crew using onboard GPS	WGS84	1575		Imaged at 10x magnification, broken open, imaged again on SEM	250-300	VM_2-3_006	Unknown
IP.309470	VM20-248	IPE.08379	0.01	33.5	-64.4	1000	determined by crew using onboard GPS	WGS84	1575		Imaged at 10x magnification, broken open, imaged again on SEM	250-300	VM_2-3_060	Globigerinella siphonifera
IP.309471	VM20-248	IPE.08379	0.01	33.5	-64.4	1000	determined by crew using onboard GPS	WGS84	1575		Imaged at 10x magnification, broken open, imaged again on SEM	250-300	VM_2-3_061	Unknown
IP.309472	VM20-248	IPE.08379	0.01	33.5	-64.4	1000	determined by crew using onboard GPS	WGS84	1575		Imaged at 10x magnification, broken open, imaged again on SEM	250-300	VM_2-3_062	Globorotalia inflata
IP.309473	VM20-248	IPE.08379	0.01	33.5	-64.4	1000	determined by crew using onboard GPS	WGS84	1575		Imaged at 10x magnification, broken open, imaged again on SEM	250-300	VM_2-3_063	Globorotalia truncatulinoides
IP.309474	VM20-248	IPE.08379	0.01	33.5	-64.4	1000	determined by crew using onboard GPS	WGS84	1575		Imaged at 10x magnification, broken open, imaged again on SEM	250-300	VM_2-3_064	Globorotalia inflata
IP.309475	VM20-248	IPE.08379	0.01	33.5	-64.4	1000	determined by crew using onboard GPS	WGS84	1575		Imaged at 10x magnification, broken open, imaged again on SEM	250-300	VM_2-3_065	Neogloboquadrina dutertrei
IP.309476	VM20-248	IPE.08379	0.01	33.5	-64.4	1000	determined by crew using onboard GPS	WGS84	1575		Imaged at 10x magnification, broken open, imaged again on SEM	250-300	VM_2-3_066	Globorotalia truncatulinoides
IP.309477	VM20-248	IPE.08379	0.01	33.5	-64.4	1000	determined by crew using onboard GPS	WGS84	1575		Imaged at 10x magnification, broken open, imaged again on SEM	250-300	VM_2-3_067	Globorotalia truncatulinoides
IP.309478	VM20-248	IPE.08379	0.01	33.5	-64.4	1000	determined by crew using onboard GPS	WGS84	1575		Imaged at 10x magnification, broken open, imaged again on SEM	250-300	VM_2-3_068	Globigerinoides conglobatus
IP.309479	VM20-248	IPE.08379	0.01	33.5	-64.4	1000	determined by crew using onboard GPS	WGS84	1575		Imaged at 10x magnification, broken open, imaged again on SEM	250-300	VM_2-3_069
IP.309480	VM20-248	IPE.08379	0.01	33.5	-64.4	1000	determined by crew using onboard GPS	WGS84	1575		Imaged at 10x magnification, broken open, imaged again on SEM	250-300	VM_2-3_007
IP.309481	VM20-248	IPE.08379	0.01	33.5	-64.4	1000	determined by crew using onboard GPS	WGS84	1575		Imaged at 10x magnification, broken open, imaged again on SEM	250-300	VM_2-3_070
IP.309482	VM20-248	IPE.08379	0.01	33.5	-64.4	1000	determined by crew using onboard GPS	WGS84	1575		Imaged at 10x magnification, broken open, imaged again on SEM	250-300	VM_2-3_008
IP.309483	VM20-248	IPE.08379	0.01	33.5	-64.4	1000	determined by crew using onboard GPS	WGS84	1575		Imaged at 10x magnification, broken open, imaged again on SEM	250-300	VM_2-3_009
IP.309484	VM20-248	IPE.08379	0.01	33.5	-64.4	1000	determined by crew using onboard GPS	WGS84	1575		Imaged at 10x magnification, broken open, imaged again on SEM	300-425	VM_3-4_001
IP.309485	VM20-248	IPE.08379	0.01	33.5	-64.4	1000	determined by crew using onboard GPS	WGS84	1575		Imaged at 10x magnification, broken open, imaged again on SEM	300-425	VM_3-4_001-2
IP.309486	VM20-248	IPE.08379	0.01	33.5	-64.4	1000	determined by crew using onboard GPS	WGS84	1575		Imaged at 10x magnification, broken open, imaged again on SEM	300-425	VM_3-4_010
IP.309487	VM20-248	IPE.08379	0.01	33.5	-64.4	1000	determined by crew using onboard GPS	WGS84	1575		Imaged at 10x magnification, broken open, imaged again on SEM	300-425	VM_3-4_010-2
IP.309488	VM20-248	IPE.08379	0.01	33.5	-64.4	1000	determined by crew using onboard GPS	WGS84	1575		Imaged at 10x magnification, broken open, imaged again on SEM	300-425	VM_3-4_011
IP.309489	VM20-248	IPE.08379	0.01	33.5	-64.4	1000	determined by crew using onboard GPS	WGS84	1575		Imaged at 10x magnification, broken open, imaged again on SEM	300-425	VM_3-4_012	Globorotalia inflata
IP.309490	VM20-248	IPE.08379	0.01	33.5	-64.4	1000	determined by crew using onboard GPS	WGS84	1575		Imaged at 10x magnification, broken open, imaged again on SEM	300-425	VM_3-4_013	Globigerinella siphonifera
IP.309491	VM20-248	IPE.08379	0.01	33.5	-64.4	1000	determined by crew using onboard GPS	WGS84	1575		Imaged at 10x magnification, broken open, imaged again on SEM	300-425	VM_3-4_013-2	Globigerinoides ruber
IP.309492	VM20-248	IPE.08379	0.01	33.5	-64.4	1000	determined by crew using onboard GPS	WGS84	1575		Imaged at 10x magnification, broken open, imaged again on SEM	300-425	VM_3-4_014	Globorotalia truncatulinoides
IP.309493	VM20-248	IPE.08379	0.01	33.5	-64.4	1000	determined by crew using onboard GPS	WGS84	1575		Imaged at 10x magnification, broken open, imaged again on SEM	300-425	VM_3-4_014-2	Globigerinoides ruber
IP.309494	VM20-248	IPE.08379	0.01	33.5	-64.4	1000	determined by crew using onboard GPS	WGS84	1575		Imaged at 10x magnification, broken open, imaged again on SEM	300-425	VM_3-4_015	Globorotalia truncatulinoides
IP.309495	VM20-248	IPE.08379	0.01	33.5	-64.4	1000	determined by crew using onboard GPS	WGS84	1575		Imaged at 10x magnification, broken open, imaged again on SEM	300-425	VM_3-4_015-2	Globigerinoides ruber
IP.309496	VM20-248	IPE.08379	0.01	33.5	-64.4	1000	determined by crew using onboard GPS	WGS84	1575		Imaged at 10x magnification, broken open, imaged again on SEM	300-425	VM_3-4_016	Neogloboquadrina dutertrei
IP.309497	VM20-248	IPE.08379	0.01	33.5	-64.4	1000	determined by crew using onboard GPS	WGS84	1575		Imaged at 10x magnification, broken open, imaged again on SEM	300-425	VM_3-4_016-1	Globigerinoides ruber
IP.309498	VM20-248	IPE.08379	0.01	33.5	-64.4	1000	determined by crew using onboard GPS	WGS84	1575		Imaged at 10x magnification, broken open, imaged again on SEM	300-425	VM_3-4_017	Globorotalia inflata
IP.309499	VM20-248	IPE.08379	0.01	33.5	-64.4	1000	determined by crew using onboard GPS	WGS84	1575		Imaged at 10x magnification, broken open, imaged again on SEM	300-425	VM_3-4_018	Globorotalia truncatulinoides
IP.309500	VM20-248	IPE.08379	0.01	33.5	-64.4	1000	determined by crew using onboard GPS	WGS84	1575		Imaged at 10x magnification, broken open, imaged again on SEM	300-425	VM_3-4_019	Globorotalia hirsuta
IP.309501	VM20-248	IPE.08379	0.01	33.5	-64.4	1000	determined by crew using onboard GPS	WGS84	1575		Imaged at 10x magnification, broken open, imaged again on SEM	300-425	VM_3-4_002	Globorotalia hirsuta
IP.309502	VM20-248	IPE.08379	0.01	33.5	-64.4	1000	determined by crew using onboard GPS	WGS84	1575		Imaged at 10x magnification, broken open, imaged again on SEM	300-425	VM_3-4_002-2	Globigerinoides ruber
IP.309503	VM20-248	IPE.08379	0.01	33.5	-64.4	1000	determined by crew using onboard GPS	WGS84	1575		Imaged at 10x magnification, broken open, imaged again on SEM	300-425	VM_3-4_020	Globorotalia truncatulinoides
IP.309504	VM20-248	IPE.08379	0.01	33.5	-64.4	1000	determined by crew using onboard GPS	WGS84	1575		Imaged at 10x magnification, broken open, imaged again on SEM	300-425	VM_3-4_020-2	Globigerinella siphonifera
IP.309505	VM20-248	IPE.08379	0.01	33.5	-64.4	1000	determined by crew using onboard GPS	WGS84	1575		Imaged at 10x magnification, broken open, imaged again on SEM	300-425	VM_3-4_021	Globorotalia inflata
IP.309506	VM20-248	IPE.08379	0.01	33.5	-64.4	1000	determined by crew using onboard GPS	WGS84	1575		Imaged at 10x magnification, broken open, imaged again on SEM	300-425	VM_3-4_022	Globigerinoides sacculifer
IP.309507	VM20-248	IPE.08379	0.01	33.5	-64.4	1000	determined by crew using onboard GPS	WGS84	1575		Imaged at 10x magnification, broken open, imaged again on SEM	300-425	VM_3-4_023	Globorotalia inflata
IP.309508	VM20-248	IPE.08379	0.01	33.5	-64.4	1000	determined by crew using onboard GPS	WGS84	1575		Imaged at 10x magnification, broken open, imaged again on SEM	300-425	VM_3-4_024	Globorotalia inflata
IP.309509	VM20-248	IPE.08379	0.01	33.5	-64.4	1000	determined by crew using onboard GPS	WGS84	1575		Imaged at 10x magnification, broken open, imaged again on SEM	300-425	VM_3-4_025	Globorotalia hirsuta
IP.309510	VM20-248	IPE.08379	0.01	33.5	-64.4	1000	determined by crew using onboard GPS	WGS84	1575		Imaged at 10x magnification, broken open, imaged again on SEM	300-425	VM_3-4_026	Globigerinoides sacculifer
IP.309511	VM20-248	IPE.08379	0.01	33.5	-64.4	1000	determined by crew using onboard GPS	WGS84	1575		Imaged at 10x magnification, broken open, imaged again on SEM	300-425	VM_3-4_027	Globorotalia truncatulinoides
IP.309512	VM20-248	IPE.08379	0.01	33.5	-64.4	1000	determined by crew using onboard GPS	WGS84	1575		Imaged at 10x magnification, broken open, imaged again on SEM	300-425	VM_3-4_028	Globorotalia truncatulinoides
IP.309513	VM20-248	IPE.08379	0.01	33.5	-64.4	1000	determined by crew using onboard GPS	WGS84	1575		Imaged at 10x magnification, broken open, imaged again on SEM	300-425	VM_3-4_029	Globigerinoides ruber
IP.309514	VM20-248	IPE.08379	0.01	33.5	-64.4	1000	determined by crew using onboard GPS	WGS84	1575		Imaged at 10x magnification, broken open, imaged again on SEM	300-425	VM_3-4_003	Globorotalia hirsuta
IP.309515	VM20-248	IPE.08379	0.01	33.5	-64.4	1000	determined by crew using onboard GPS	WGS84	1575		Imaged at 10x magnification, broken open, imaged again on SEM	300-425	VM_3-4_003-2	Globorotalia hirsuta
IP.309516	VM20-248	IPE.08379	0.01	33.5	-64.4	1000	determined by crew using onboard GPS	WGS84	1575		Imaged at 10x magnification, broken open, imaged again on SEM	300-425	VM_3-4_030	Globorotalia inflata
IP.309517	VM20-248	IPE.08379	0.01	33.5	-64.4	1000	determined by crew using onboard GPS	WGS84	1575		Imaged at 10x magnification, broken open, imaged again on SEM	300-425	VM_3-4_031	Unknown
IP.309518	VM20-248	IPE.08379	0.01	33.5	-64.4	1000	determined by crew using onboard GPS	WGS84	1575		Imaged at 10x magnification, broken open, imaged again on SEM	300-425	VM_3-4_032	Globorotalia inflata
IP.309519	VM20-248	IPE.08379	0.01	33.5	-64.4	1000	determined by crew using onboard GPS	WGS84	1575		Imaged at 10x magnification, broken open, imaged again on SEM	300-425	VM_3-4_033	Globorotalia truncatulinoides
IP.309520	VM20-248	IPE.08379	0.01	33.5	-64.4	1000	determined by crew using onboard GPS	WGS84	1575		Imaged at 10x magnification, broken open, imaged again on SEM	300-425	VM_3-4_034	Globigerinoides ruber
IP.309521	VM20-248	IPE.08379	0.01	33.5	-64.4	1000	determined by crew using onboard GPS	WGS84	1575		Imaged at 10x magnification, broken open, imaged again on SEM	300-425	VM_3-4_035	Globigerinoides sacculifer
IP.309522	VM20-248	IPE.08379	0.01	33.5	-64.4	1000	determined by crew using onboard GPS	WGS84	1575		Imaged at 10x magnification, broken open, imaged again on SEM	300-425	VM_3-4_036	Globigerinoides ruber
IP.309523	VM20-248	IPE.08379	0.01	33.5	-64.4	1000	determined by crew using onboard GPS	WGS84	1575		Imaged at 10x magnification, broken open, imaged again on SEM	300-425	VM_3-4_037	Globorotalia inflata
IP.309524	VM20-248	IPE.08379	0.01	33.5	-64.4	1000	determined by crew using onboard GPS	WGS84	1575		Imaged at 10x magnification, broken open, imaged again on SEM	300-425	VM_3-4_038	Globigerinoides ruber
IP.309525	VM20-248	IPE.08379	0.01	33.5	-64.4	1000	determined by crew using onboard GPS	WGS84	1575		Imaged at 10x magnification, broken open, imaged again on SEM	300-425	VM_3-4_039	Globigerinoides sacculifer
IP.309526	VM20-248	IPE.08379	0.01	33.5	-64.4	1000	determined by crew using onboard GPS	WGS84	1575		Imaged at 10x magnification, broken open, imaged again on SEM	300-425	VM_3-4_004	Globorotalia inflata
IP.309527	VM20-248	IPE.08379	0.01	33.5	-64.4	1000	determined by crew using onboard GPS	WGS84	1575		Imaged at 10x magnification, broken open, imaged again on SEM	300-425	VM_3-4_004-2	Hirsuta hirsutella
IP.309528	VM20-248	IPE.08379	0.01	33.5	-64.4	1000	determined by crew using onboard GPS	WGS84	1575		Imaged at 10x magnification, broken open, imaged again on SEM	300-425	VM_3-4_040	Globigerinella siphonifera
IP.309529	VM20-248	IPE.08379	0.01	33.5	-64.4	1000	determined by crew using onboard GPS	WGS84	1575		Imaged at 10x magnification, broken open, imaged again on SEM	300-425	VM_3-4_041	Globigerinoides ruber
IP.309530	VM20-248	IPE.08379	0.01	33.5	-64.4	1000	determined by crew using onboard GPS	WGS84	1575		Imaged at 10x magnification, broken open, imaged again on SEM	300-425	VM_3-4_042	Globigerinella siphonifera
IP.309531	VM20-248	IPE.08379	0.01	33.5	-64.4	1000	determined by crew using onboard GPS	WGS84	1575		Imaged at 10x magnification, broken open, imaged again on SEM	300-425	VM_3-4_043	Globigerinella siphonifera
IP.309532	VM20-248	IPE.08379	0.01	33.5	-64.4	1000	determined by crew using onboard GPS	WGS84	1575		Imaged at 10x magnification, broken open, imaged again on SEM	300-425	VM_3-4_044	Globorotalia hirsuta
IP.309533	VM20-248	IPE.08379	0.01	33.5	-64.4	1000	determined by crew using onboard GPS	WGS84	1575		Imaged at 10x magnification, broken open, imaged again on SEM	300-425	VM_3-4_045	Globigerinoides sacculifer
IP.309534	VM20-248	IPE.08379	0.01	33.5	-64.4	1000	determined by crew using onboard GPS	WGS84	1575		Imaged at 10x magnification, broken open, imaged again on SEM	300-425	VM_3-4_046	Globorotalia inflata
IP.309535	VM20-248	IPE.08379	0.01	33.5	-64.4	1000	determined by crew using onboard GPS	WGS84	1575		Imaged at 10x magnification, broken open, imaged again on SEM	300-425	VM_3-4_047	Globorotalia truncatulinoides
IP.309536	VM20-248	IPE.08379	0.01	33.5	-64.4	1000	determined by crew using onboard GPS	WGS84	1575		Imaged at 10x magnification, broken open, imaged again on SEM	300-425	VM_3-4_048	Globorotalia hirsuta
IP.309537	VM20-248	IPE.08379	0.01	33.5	-64.4	1000	determined by crew using onboard GPS	WGS84	1575		Imaged at 10x magnification, broken open, imaged again on SEM	300-425	VM_3-4_049	Globorotalia hirsuta
IP.309538	VM20-248	IPE.08379	0.01	33.5	-64.4	1000	determined by crew using onboard GPS	WGS84	1575		Imaged at 10x magnification, broken open, imaged again on SEM	300-425	VM_3-4_005	Globigerinella siphonifera
IP.309539	VM20-248	IPE.08379	0.01	33.5	-64.4	1000	determined by crew using onboard GPS	WGS84	1575		Imaged at 10x magnification, broken open, imaged again on SEM	300-425	VM_3-4_050	Globorotalia inflata
IP.309540	VM20-248	IPE.08379	0.01	33.5	-64.4	1000	determined by crew using onboard GPS	WGS84	1575		Imaged at 10x magnification, broken open, imaged again on SEM	300-425	VM_3-4_051	Neogloboquadrina dutertrei
IP.309541	VM20-248	IPE.08379	0.01	33.5	-64.4	1000	determined by crew using onboard GPS	WGS84	1575		Imaged at 10x magnification, broken open, imaged again on SEM	300-425	VM_3-4_052	Globorotalia inflata
IP.309542	VM20-248	IPE.08379	0.01	33.5	-64.4	1000	determined by crew using onboard GPS	WGS84	1575		Imaged at 10x magnification, broken open, imaged again on SEM	300-425	VM_3-4_053	Globorotalia inflata
IP.309543	VM20-248	IPE.08379	0.01	33.5	-64.4	1000	determined by crew using onboard GPS	WGS84	1575		Imaged at 10x magnification, broken open, imaged again on SEM	300-425	VM_3-4_054	Globigerinoides sacculifer
IP.309544	VM20-248	IPE.08379	0.01	33.5	-64.4	1000	determined by crew using onboard GPS	WGS84	1575		Imaged at 10x magnification, broken open, imaged again on SEM	300-425	VM_3-4_055	Globigerinella siphonifera
IP.309545	VM20-248	IPE.08379	0.01	33.5	-64.4	1000	determined by crew using onboard GPS	WGS84	1575		Imaged at 10x magnification, broken open, imaged again on SEM	300-425	VM_3-4_056	Globorotalia truncatulinoides
IP.309546	VM20-248	IPE.08379	0.01	33.5	-64.4	1000	determined by crew using onboard GPS	WGS84	1575		Imaged at 10x magnification, broken open, imaged again on SEM	300-425	VM_3-4_057	Globorotalia inflata
IP.309547	VM20-248	IPE.08379	0.01	33.5	-64.4	1000	determined by crew using onboard GPS	WGS84	1575		Imaged at 10x magnification, broken open, imaged again on SEM	300-425	VM_3-4_058	Globorotalia truncatulinoides
IP.309548	VM20-248	IPE.08379	0.01	33.5	-64.4	1000	determined by crew using onboard GPS	WGS84	1575		Imaged at 10x magnification, broken open, imaged again on SEM	300-425	VM_3-4_059	Globorotalia truncatulinoides
IP.309549	VM20-248	IPE.08379	0.01	33.5	-64.4	1000	determined by crew using onboard GPS	WGS84	1575		Imaged at 10x magnification, broken open, imaged again on SEM	300-425	VM_3-4_006	Globorotalia inflata
IP.309550	VM20-248	IPE.08379	0.01	33.5	-64.4	1000	determined by crew using onboard GPS	WGS84	1575		Imaged at 10x magnification, broken open, imaged again on SEM	300-425	VM_3-4_006-2	Hirsuta hirsutella
IP.309551	VM20-248	IPE.08379	0.01	33.5	-64.4	1000	determined by crew using onboard GPS	WGS84	1575		Imaged at 10x magnification, broken open, imaged again on SEM	300-425	VM_3-4_060	Globorotalia inflata
IP.309552	VM20-248	IPE.08379	0.01	33.5	-64.4	1000	determined by crew using onboard GPS	WGS84	1575		Imaged at 10x magnification, broken open, imaged again on SEM	300-425	VM_3-4_061	Neogloboquadrina dutertrei
IP.309553	VM20-248	IPE.08379	0.01	33.5	-64.4	1000	determined by crew using onboard GPS	WGS84	1575		Imaged at 10x magnification, broken open, imaged again on SEM	300-425	VM_3-4_062	Globigerinoides ruber
IP.309554	VM20-248	IPE.08379	0.01	33.5	-64.4	1000	determined by crew using onboard GPS	WGS84	1575		Imaged at 10x magnification, broken open, imaged again on SEM	300-425	VM_3-4_063	Globorotalia inflata
IP.309555	VM20-248	IPE.08379	0.01	33.5	-64.4	1000	determined by crew using onboard GPS	WGS84	1575		Imaged at 10x magnification, broken open, imaged again on SEM	300-425	VM_3-4_064	Unknown
IP.309556	VM20-248	IPE.08379	0.01	33.5	-64.4	1000	determined by crew using onboard GPS	WGS84	1575		Imaged at 10x magnification, broken open, imaged again on SEM	300-425	VM_3-4_065	Globigerinoides ruber
IP.309557	VM20-248	IPE.08379	0.01	33.5	-64.4	1000	determined by crew using onboard GPS	WGS84	1575		Imaged at 10x magnification, broken open, imaged again on SEM	300-425	VM_3-4_066	Globorotalia truncatulinoides
IP.309558	VM20-248	IPE.08379	0.01	33.5	-64.4	1000	determined by crew using onboard GPS	WGS84	1575		Imaged at 10x magnification, broken open, imaged again on SEM	300-425	VM_3-4_067	Globorotalia truncatulinoides
IP.309559	VM21	IPE.08379	0.01	33.5	-64.4	1000	determined by crew using onboard GPS	WGS84	1575		Imaged at 10x magnification, broken open, imaged again on SEM	300-425	VM_3-4_068	Globigerinella siphonifera
IP.309560	VM22	IPE.08379	0.01	33.5	-64.4	1000	determined by crew using onboard GPS	WGS84	1575		Imaged at 10x magnification, broken open, imaged again on SEM	300-425	VM_3-4_069	Globorotalia inflata
IP.309561	VM23	IPE.08379	0.01	33.5	-64.4	1000	determined by crew using onboard GPS	WGS84	1575		Imaged at 10x magnification, broken open, imaged again on SEM	300-425	VM_3-4_007	Globigerinoides sacculifer
IP.309562	VM24	IPE.08379	0.01	33.5	-64.4	1000	determined by crew using onboard GPS	WGS84	1575		Imaged at 10x magnification, broken open, imaged again on SEM	300-425	VM_3-4_007-2	Globigerinella siphonifera
IP.309563	VM25	IPE.08379	0.01	33.5	-64.4	1000	determined by crew using onboard GPS	WGS84	1575		Imaged at 10x magnification, broken open, imaged again on SEM	300-425	VM_3-4_070	Globorotalia inflata
IP.309564	VM26	IPE.08379	0.01	33.5	-64.4	1000	determined by crew using onboard GPS	WGS84	1575		Imaged at 10x magnification, broken open, imaged again on SEM	300-425	VM_3-4_071	Globigerinoides ruber
IP.309565	VM27	IPE.08379	0.01	33.5	-64.4	1000	determined by crew using onboard GPS	WGS84	1575		Imaged at 10x magnification, broken open, imaged again on SEM	300-425	VM_3-4_072	Unknown
IP.309566	VM28	IPE.08379	0.01	33.5	-64.4	1000	determined by crew using onboard GPS	WGS84	1575		Imaged at 10x magnification, broken open, imaged again on SEM	300-425	VM_3-4_073	Neogloboquadrina dutertrei
IP.309567	VM29	IPE.08379	0.01	33.5	-64.4	1000	determined by crew using onboard GPS	WGS84	1575		Imaged at 10x magnification, broken open, imaged again on SEM	300-425	VM_3-4_008	Globorotalia inflata
IP.309568	VM30	IPE.08379	0.01	33.5	-64.4	1000	determined by crew using onboard GPS	WGS84	1575		Imaged at 10x magnification, broken open, imaged again on SEM	300-425	VM_3-4_009	Globorotalia hirsuta

## Sheet: ST2. 2dMorph
YPM Catalog Number	Locality	YPM Locality Code	Latitude	Longitude	Size Fraction (μm)	Specimen ID	Species ID	Slide ID- UMBILICAL	Segment ID - UMBILICAL	2D Area (μm2)	Major Axis Length- UMBILICAL (μm)	Minor Axis Length -UMBILICAL (μm)	Perimeter - UMBILICAL (μm)	Slide ID - SPIRAL	Segment ID - SPIRAL	2d Area - SPIRAL (μm2)	Major Axis Length -SPIRAL (μm)	Minor Axis Length -SPIRAL (μm)	Perimeter -SPIRAL (μm)
IP.308224	AII-42-15-14	IPE.08212	19.567	-44.95	300-425	A42_3-4_014	Globigerinoides ruber	AII-42-15-14_300-425um_umb	AII42-15-14_obj00015	168395	497.586	441.135	1544.56	AII-42-15-14_300-425um_sp	AII42-15-14_obj00017	124937	429.176	382.246	1359.34
IP.308225	AII-42-15-14	IPE.08212	19.567	-44.95	300-425	A42_3-4_015	Globigerinoides ruber	AII-42-15-14_300-425um_umb	AII42-15-14_obj00016					AII-42-15-14_300-425um_sp	AII42-15-14_obj00015	108391	396.723	357.869	1359.87
IP.308226	AII-42-15-14	IPE.08212	19.567	-44.95	300-425	A42_3-4_016	Globigerinoides sacculifer	AII-42-15-14_300-425um_umb	AII42-15-14_obj00014	216966	606.451	469.874	1820.81	AII-42-15-14_300-425um_sp	AII42-15-14_obj00016	176017	559.79	412.359	1810.43
IP.308227	AII-42-15-14	IPE.08212	19.567	-44.95	300-425	A42_3-4_027	Globigerinoides sacculifer	AII-42-15-14_300-425um_umb	AII42-15-14_obj00025	212952	618.151	451.357	1780.05	AII-42-15-14_300-425um_sp	AII42-15-14_obj00023	174140	560.461	406.501	3354.38
IP.308228	AII-42-15-14	IPE.08212	19.567	-44.95	300-425	A42_3-4_028	Globigerinoides sacculifer	AII-42-15-14_300-425um_umb	AII42-15-14_obj00022	221643	628.555	457.183	1796.44	AII-42-15-14_300-425um_sp	AII42-15-14_obj00021	180638	572.115	409.316	1619.98
IP.308229	AII-42-15-14	IPE.08212	19.567	-44.95	300-425	A42_3-4_029	Globigerinoides sacculifer	AII-42-15-14_300-425um_umb	AII42-15-14_obj00023	236487	633.832	492.51	1879.55	AII-42-15-14_300-425um_sp	AII42-15-14_obj00025	208167	605.102	458.074	1836.29
IP.308230	AII-42-15-14	IPE.08212	19.567	-44.95	300-425	A42_3-4_030	Globigerinoides sacculifer	AII-42-15-14_300-425um_umb	AII42-15-14_obj00028	204343	574.747	466.184	1732.1	AII-42-15-14_300-425um_sp	AII42-15-14_obj00028	153703	506.832	397.243	1539.01
IP.308231	AII-42-15-14	IPE.08212	19.567	-44.95	300-425	A42_3-4_031	Globigerinoides sacculifer	AII-42-15-14_300-425um_umb	AII42-15-14_obj00031	220365	639.61	447.627	1811.21	AII-42-15-14_300-425um_sp	AII42-15-14_obj00031	150616	531.262	367.672	1534.09
IP.308232	AII-42-15-14	IPE.08212	19.567	-44.95	300-425	A42_3-4_032	Globigerinella siphonifera	AII-42-15-14_300-425um_umb	AII42-15-14_obj00035	202545	614.785	445.03	1914.56	AII-42-15-14_300-425um_sp	AII42-15-14_obj00033	195440	596.006	439.748	2042.33
IP.308233	AII-42-15-14	IPE.08212	19.567	-44.95	300-425	A42_3-4_034	Globigerinella siphonifera	AII-42-15-14_300-425um_umb	AII42-15-14_obj00040	230602	619.727	486.408	1876.85	AII-42-15-14_300-425um_sp	AII42-15-14_obj00037	180974	551.952	430.6	3488.23
IP.308234	AII-42-15-14	IPE.08212	19.567	-44.95	300-425	A42_3-4_036	Globorotalia tumida	AII-42-15-14_300-425um_umb	AII42-15-14_obj00039	321573	735.176	560.56	2088.84	AII-42-15-14_300-425um_sp
IP.308235	AII-42-15-14	IPE.08212	19.567	-44.95	300-425	A42_3-4_037	Globorotalia tumida	AII-42-15-14_300-425um_umb	AII42-15-14_obj00037	283784	671.092	544.633	1975.4	AII-42-15-14_300-425um_sp
IP.308236	AII-42-15-14	IPE.08212	19.567	-44.95	300-425	A42_3-4_055	Globigerinella siphonifera	AII-42-15-14_300-425um_umb	AII42-15-14_obj00053	174067	554.319	409.061	1628.68	AII-42-15-14_300-425um_sp
IP.308237	AII-42-15-14	IPE.08212	19.567	-44.95	300-425	A42_3-4_006	Globigerinoides ruber	AII-42-15-14_300-425um_umb	AII42-15-14_obj00008	195905	552.866	464.686	1691.54	AII-42-15-14_300-425um_sp	AII42-15-14_obj00002	152768	482.843	416.339	1554.91
IP.308238	AII-42-15-14	IPE.08212	19.567	-44.95	300-425	A42_3-4_062	Globorotalia truncatulinoides	AII-42-15-14_300-425um_umb	AII42-15-14_obj00063	228254	593.075	497.125	1801.01	AII-42-15-14_300-425um_sp
IP.308239	AII-42-15-14	IPE.08212	19.567	-44.95	300-425	A42_3-4_066	Globorotalia truncatulinoides	AII-42-15-14_300-425um_umb	AII42-15-14_obj00070	243233	597.755	523.804	1832.6	AII-42-15-14_300-425um_sp
IP.308240	AII-42-15-14	IPE.08212	19.567	-44.95	300-425	A42_3-4_068	Globorotalia truncatulinoides	AII-42-15-14_300-425um_umb	AII42-15-14_obj00066	266460	634.452	542.093	1917.32	AII-42-15-14_300-425um_sp
IP.308241	AII-42-15-14	IPE.08212	19.567	-44.95	300-425	A42_3-4_069	Globorotalia truncatulinoides	AII-42-15-14_300-425um_umb	AII42-15-14_obj00068	253778	631.224	517.737	1858.33	AII-42-15-14_300-425um_sp
IP.308242	AII-42-15-14	IPE.08212	19.567	-44.95	300-425	A42_3-4_070	Globorotalia truncatulinoides	AII-42-15-14_300-425um_umb	AII42-15-14_obj00072	261136	659.872	516.87	4493.41	AII-42-15-14_300-425um_sp
IP.308243	AII-42-15-14	IPE.08212	19.567	-44.95	300-425	A42_3-4_009	Globigerinoides ruber	AII-42-15-14_300-425um_umb	AII42-15-14_obj00006	174338	551.135	415.954	3382.48	AII-42-15-14_300-425um_sp	AII42-15-14_obj00007	138425	496.824	366.675	1546.97
IP.308244	AII-42-15-14	IPE.08212	19.567	-44.95	425-600	A42_4-6_001	Globorotalia truncatulinoides	AII-42-15-14_425-600um_umb	AII42-15-14_obj00010	421768	800.381	678.494	2424.86	AII-42-15-14_425-600um_sp	AII42-15-14_obj00005	309685	751.903	545.642	2325.89
IP.308245	AII-42-15-14	IPE.08212	19.567	-44.95	425-600	A42_4-6_011	Globorotalia truncatulinoides	AII-42-15-14_425-600um_umb	AII42-15-14_obj00021	369700	744.723	638.484	2264.2	AII-42-15-14_425-600um_sp
IP.308246	AII-42-15-14	IPE.08212	19.567	-44.95	425-600	A42_4-6_014	Globorotalia truncatulinoides	AII-42-15-14_425-600um_umb	AII42-15-14_obj00018	370471	743.068	645.171	2311.15	AII-42-15-14_425-600um_sp	AII42-15-14_obj00009	279735	633.08	591.614	2010.45
IP.308247	AII-42-15-14	IPE.08212	19.567	-44.95	425-600	A42_4-6_015	Globorotalia truncatulinoides	AII-42-15-14_425-600um_umb	AII42-15-14_obj00017	287328	652.374	567.848	1994.02	AII-42-15-14_425-600um_sp	AII42-15-14_obj00013	268012	654.071	535.799	1992.56
IP.308248	AII-42-15-14	IPE.08212	19.567	-44.95	425-600	A42_4-6_017	Orbulina universa	AII-42-15-14_425-600um_umb	AII42-15-14_obj00015	269144	594.317	576.724	1875.18	AII-42-15-14_425-600um_sp	AII42-15-14_obj00006	270060	593.1	580.128	1907.63
IP.308249	AII-42-15-14	IPE.08212	19.567	-44.95	425-600	A42_4-6_018	Orbulina universa	AII-42-15-14_425-600um_umb	AII42-15-14_obj00020	295778	614.787	612.666	1952.09	AII-42-15-14_425-600um_sp	AII42-15-14_obj00008	291795	613.622	605.528	1931.5
IP.308250	AII-42-15-14	IPE.08212	19.567	-44.95	425-600	A42_4-6_023	Orbulina universa	AII-42-15-14_425-600um_umb	AII42-15-14_obj00026	218006	527.462	526.442	1703.57	AII-42-15-14_425-600um_sp	AII42-15-14_obj00022	210241	519.957	514.866	1641.48
IP.308251	AII-42-15-14	IPE.08212	19.567	-44.95	425-600	A42_4-6_024	Orbulina universa	AII-42-15-14_425-600um_umb	AII42-15-14_obj00030	274534	601.488	581.33	1911.82	AII-42-15-14_425-600um_sp	AII42-15-14_obj00019	264593	585.581	575.402	1837.42
IP.308252	AII-42-15-14	IPE.08212	19.567	-44.95	425-600	A42_4-6_034	Globorotalia truncatulinoides	AII-42-15-14_425-600um_umb	AII42-15-14_obj00037	368623	770.054	622.277	2327.47	AII-42-15-14_425-600um_sp	AII42-15-14_obj00027	231461	673.633	446.457	1864.5
IP.308253	AII-42-15-14	IPE.08212	19.567	-44.95	425-600	A42_4-6_035	Globigerinoides sacculifer	AII-42-15-14_425-600um_umb	AII42-15-14_obj00042	279655	693.303	529.102	2061.9	AII-42-15-14_425-600um_sp	AII42-15-14_obj00025	261319	690.518	499.617	1966.28
IP.308254	AII-42-15-14	IPE.08212	19.567	-44.95	425-600	A42_4-6_036	Globigerinoides sacculifer	AII-42-15-14_425-600um_umb	AII42-15-14_obj00035	317182	748.687	564.413	2222.88	AII-42-15-14_425-600um_sp	AII42-15-14_obj00024	316158	744.779	565.881	2190.83
IP.308255	AII-42-15-14	IPE.08212	19.567	-44.95	425-600	A42_4-6_037	Globigerinoides sacculifer	AII-42-15-14_425-600um_umb	AII42-15-14_obj00039	354167	783.556	590.955	2246	AII-42-15-14_425-600um_sp	AII42-15-14_obj00028	354798	777.343	597.643	2283.18
IP.308256	AII-42-15-14	IPE.08212	19.567	-44.95	425-600	A42_4-6_038	Globigerinoides sacculifer	AII-42-15-14_425-600um_umb	AII42-15-14_obj00036	322937	733.96	575.394	4945.3	AII-42-15-14_425-600um_sp	AII42-15-14_obj00026	300521	696.41	569.888	2251.13
IP.308257	AII-42-15-14	IPE.08212	19.567	-44.95	425-600	A42_4-6_004	Orbulina universa	AII-42-15-14_425-600um_umb	AII42-15-14_obj00009	331513	655.011	644.588	2091.18	AII-42-15-14_425-600um_sp	AII42-15-14_obj00003	320361	644.722	632.811	4092.55
IP.308258	AII-42-15-14	IPE.08212	19.567	-44.95	425-600	A42_4-6_040	Globorotalia tumida	AII-42-15-14_425-600um_umb	AII42-15-14_obj00055	715673	1078.66	856.126	3177.11	AII-42-15-14_425-600um_sp	AII42-15-14_obj00041	668095	1067.92	810.298	3079.68
IP.308259	AII-42-15-14	IPE.08212	19.567	-44.95	425-600	A42_4-6_045	Globigerinoides sacculifer	AII-42-15-14_425-600um_umb	AII42-15-14_obj00047	304819	726.744	549.582	2141.18	AII-42-15-14_425-600um_sp	AII42-15-14_obj00039	295058	721.319	535.693	2098.53
IP.308260	AII-42-15-14	IPE.08212	19.567	-44.95	425-600	A42_4-6_046	Globorotalia truncatulinoides	AII-42-15-14_425-600um_umb	AII42-15-14_obj00046	451924	826.947	704.55	2508.41	AII-42-15-14_425-600um_sp	AII42-15-14_obj00035	385426	801.476	624.557	2448.88
IP.308261	AII-42-15-14	IPE.08212	19.567	-44.95	425-600	A42_4-6_047	Globorotalia tumida	AII-42-15-14_425-600um_umb	AII42-15-14_obj00049	520511	946.243	716.312	2824.93	AII-42-15-14_425-600um_sp	AII42-15-14_obj00034	531555	965.683	713.153	2776.67
IP.308262	AII-42-15-14	IPE.08212	19.567	-44.95	425-600	A42_4-6_048	Globigerinoides sacculifer	AII-42-15-14_425-600um_umb	AII42-15-14_obj00045	408881	868.358	623.825	2534.05	AII-42-15-14_425-600um_sp	AII42-15-14_obj00038	395575	852.31	611.794	2445.26
IP.308263	AII-42-15-14	IPE.08212	19.567	-44.95	425-600	A42_4-6_049	Globorotalia tumida	AII-42-15-14_425-600um_umb	AII42-15-14_obj00050	325437	749.914	557.908	2104.75	AII-42-15-14_425-600um_sp	AII42-15-14_obj00037	286784	787.1	470.561	2028.6
IP.308264	AII-42-15-14	IPE.08212	19.567	-44.95	425-600	A42_4-6_050	Globorotalia tumida	AII-42-15-14_425-600um_umb	AII42-15-14_obj00064	265033	639.399	540.975	2222.28	AII-42-15-14_425-600um_sp
IP.308265	AII-42-15-14	IPE.08212	19.567	-44.95	425-600	A42_4-6_052	Globorotalia tumida	AII-42-15-14_425-600um_umb	AII42-15-14_obj00060	320800	731.345	569.321	2159.18	AII-42-15-14_425-600um_sp	AII42-15-14_obj00050	200146	597.582	444.71	1744.04
IP.308266	AII-42-15-14	IPE.08212	19.567	-44.95	425-600	A42_4-6_053	Globorotalia truncatulinoides	AII-42-15-14_425-600um_umb	AII42-15-14_obj00065	274127	662.188	537.031	1965.45	AII-42-15-14_425-600um_sp	AII42-15-14_obj00048	242063	629.261	515.305	1935.7
IP.308267	AII-42-15-14	IPE.08212	19.567	-44.95	425-600	A42_4-6_054	Globorotalia tumida	AII-42-15-14_425-600um_umb	AII42-15-14_obj00056	377768	774.489	623.957	2236.57	AII-42-15-14_425-600um_sp	AII42-15-14_obj00052	415222	820.999	649.145	4831.01
IP.308268	AII-42-15-14	IPE.08212	19.567	-44.95	425-600	A42_4-6_058	Globorotalia truncatulinoides	AII-42-15-14_425-600um_umb	AII42-15-14_obj00062	268914	636.282	548.601	2002.35	AII-42-15-14_425-600um_sp	AII42-15-14_obj00049	236540	625.433	511.887	3999.09
IP.308269	AII-42-15-14	IPE.08212	19.567	-44.95	425-600	A42_4-6_007	Orbulina universa	AII-42-15-14_425-600um_umb	AII42-15-14_obj00007	243629	563.464	552.06	3765.81	AII-42-15-14_425-600um_sp
IP.308270	AII-42-15-14	IPE.08212	19.567	-44.95	425-600	A42_4-6_008	Orbulina universa	AII-42-15-14_425-600um_umb						AII-42-15-14_425-600um_sp	AII42-15-14_obj00002	228655	541.968	537.204	1707.22
IP.308271	AII-42-15-14	IPE.08212	19.567	-44.95	425-600	A42_4-6_009	Globorotalia tumida	AII-42-15-14_425-600um_umb	AII42-15-14_obj00001					AII-42-15-14_425-600um_sp	AII42-15-14_obj00001	568603	992.467	737.166	2783.5
IP.308272	AII-60-10	IPE.08199	-29.66	-34.667	250-300	A6_2-3_011	Globigerinoides ruber	AII-60-10_250-300um_umb	AII-60-10_obj00013					AII-60-10_250-300um_sp	AII-60-10_obj00017	107246	426.86	324.911	1246.31
IP.308273	AII-60-10	IPE.08199	-29.66	-34.667	250-300	A6_2-3_014	Globigerinoides ruber	AII-60-10_250-300um_umb	AII-60-10_obj00010	69246	316.417	284.945	1001.89	AII-60-10_250-300um_sp	AII-60-10_obj00014	67063	326.606	265.502	1009.84
IP.308274	AII-60-10	IPE.08199	-29.66	-34.667	250-300	A6_2-3_015	Globorotalia inflata	AII-60-10_250-300um_umb	AII-60-10_obj00016	86073	362.808	307.245	1164.06	AII-60-10_250-300um_sp	AII-60-10_obj00013	92481	369.195	325.442	1225.18
IP.308275	AII-60-10	IPE.08199	-29.66	-34.667	250-300	A6_2-3_016	Globorotalia inflata	AII-60-10_250-300um_umb	AII-60-10_obj00019	85628	368.293	300.008	1083.07	AII-60-10_250-300um_sp	AII-60-10_obj00015	89096	374.4	306.935	1099.84
IP.308276	AII-60-10	IPE.08199	-29.66	-34.667	250-300	A6_2-3_017	Globorotalia inflata	AII-60-10_250-300um_umb	AII-60-10_obj00017	90201	355.063	329.125	1101.01	AII-60-10_250-300um_sp	AII-60-10_obj00011	88333	366.466	311.61	1153.1
IP.308277	AII-60-10	IPE.08199	-29.66	-34.667	250-300	A6_2-3_018	Globorotalia inflata	AII-60-10_250-300um_umb	AII-60-10_obj00018	79638	359.096	285.556	1055.65	AII-60-10_250-300um_sp	AII-60-10_obj00010	77290	356.341	277.791	2183.84
IP.308278	AII-60-10	IPE.08199	-29.66	-34.667	250-300	A6_2-3_019	Globigerinoides ruber	AII-60-10_250-300um_umb	AII-60-10_obj00015	88795	384.324	299.565	1143.76	AII-60-10_250-300um_sp	AII-60-10_obj00012	91226	392.411	302.123	2439.54
IP.308279	AII-60-10	IPE.08199	-29.66	-34.667	250-300	A6_2-3_020	Globigerinoides ruber	AII-60-10_250-300um_umb	AII-60-10_obj00020	86585	371.618	308.121	2330.96	AII-60-10_250-300um_sp	AII-60-10_obj00028	89257	383.313	309.818	1177.69
IP.308280	AII-60-10	IPE.08199	-29.66	-34.667	250-300	A6_2-3_022	Globigerinoides ruber	AII-60-10_250-300um_umb	AII-60-10_obj00022	80670	359.323	292.921	1089.78	AII-60-10_250-300um_sp	AII-60-10_obj00027	82725	360.794	298.637	2179.97
IP.308281	AII-60-10	IPE.08199	-29.66	-34.667	250-300	A6_2-3_026	Globorotalia inflata	AII-60-10_250-300um_umb	AII-60-10_obj00026	90132	367.601	314.524	1095.43	AII-60-10_250-300um_sp	AII-60-10_obj00022	84979	389.657	279.802	1119.78
IP.308282	AII-60-10	IPE.08199	-29.66	-34.667	250-300	A6_2-3_004	Globorotalia inflata	AII-60-10_250-300um_umb	AII-60-10_obj00006	91607	373.754	317.328	2396.98	AII-60-10_250-300um_sp	AII-60-10_obj00006	91339	386.676	307.029	1162.58
IP.308283	AII-60-10	IPE.08199	-29.66	-34.667	250-300	A6_2-3_005	Globigerinoides ruber	AII-60-10_250-300um_umb	AII-60-10_obj00005	83993	361.863	299.705	2235.47	AII-60-10_250-300um_sp	AII-60-10_obj00002	93549	380.882	319.489	2683.97
IP.308284	AII-60-10	IPE.08199	-29.66	-34.667	250-300	A6_2-3_006	Globorotalia inflata	AII-60-10_250-300um_umb	AII-60-10_obj00004	88698	373.04	305.524	2246.17	AII-60-10_250-300um_sp	AII-60-10_obj00004	93100	386.077	309.138	1148.74
IP.308285	AII-60-10	IPE.08199	-29.66	-34.667	250-300	A6_2-3_008	Globorotalia inflata	AII-60-10_250-300um_umb	AII-60-10_obj00001	87059	370.81	301.193	1088.15	AII-60-10_250-300um_sp	AII-60-10_obj00003	88125	365.005	309.16	2184.72
IP.308286	AII-60-10	IPE.08199	-29.66	-34.667	300-425	A6_3-4_010	Globigerinoides ruber	AII-60-10_300-425um_umb	AII-60-10_obj00005	178985	520.205	448.051	1648.84	AII-60-10_300-425um_sp	AII-60-10_obj00010	187671	542.573	444.371	1754.2
IP.308287	AII-60-10	IPE.08199	-29.66	-34.667	300-425	A6_3-4_021	Globigerinoides ruber	AII-60-10_300-425um_umb	AII-60-10_obj00021	190713	557.15	445.734	1683.97	AII-60-10_300-425um_sp	AII-60-10_obj00023	168661	524.209	419.37	1575.49
IP.308288	AII-60-10	IPE.08199	-29.66	-34.667	300-425	A6_3-4_022	Globigerinoides sacculifer	AII-60-10_300-425um_umb	AII-60-10_obj00013	226583	626.061	474.932	1832.34	AII-60-10_300-425um_sp	AII-60-10_obj00020	206527	643.538	418.705	2075.78
IP.308289	AII-60-10	IPE.08199	-29.66	-34.667	300-425	A6_3-4_030	Globigerinoides sacculifer	AII-60-10_300-425um_umb	AII-60-10_obj00030	258789	674.37	510.266	2032.16	AII-60-10_300-425um_sp	AII-60-10_obj00028	255679	679.919	503.386	2079.56
IP.308290	AII-60-10	IPE.08199	-29.66	-34.667	300-425	A6_3-4_004	Globigerinoides sacculifer	AII-60-10_300-425um_umb	AII-60-10_obj00004	206036	579.839	468.83	1740.09	AII-60-10_300-425um_sp	AII-60-10_obj00002	214980	597.505	472.652	1763.6
IP.308291	AII-60-10	IPE.08199	-29.66	-34.667	300-425	A6_3-4_007	Globigerinoides sacculifer	AII-60-10_300-425um_umb	AII-60-10_obj00007	166530	573.981	377.159	1574.59	AII-60-10_300-425um_sp	AII-60-10_obj00006	195935	609.918	417.302	1753.29
IP.308292	AII-60-10	IPE.08199	-29.66	-34.667	300-425	A6_3-4_008	Globigerinoides sacculifer	AII-60-10_300-425um_umb	AII-60-10_obj00009	201092	579.434	455.061	3548.67	AII-60-10_300-425um_sp	AII-60-10_obj00007	209510	600.56	450.747	3551.69
IP.308293	AII-60-10	IPE.08199	-29.66	-34.667	425-600	A6_4-6_001	Globigerinoides conglobatus	AII-60-10_425-600um_umb						AII-60-10_425-600um_sp	AII-60-10_obj00005	344933	697.423	634.103	2376.69
IP.308294	AII-60-10	IPE.08199	-29.66	-34.667	425-600	A6_4-6_011	Globigerinoides sacculifer	AII-60-10_425-600um_umb						AII-60-10_425-600um_sp	AII-60-10_obj00020	243807	645.137	495.685	2014.26
IP.308295	AII-60-10	IPE.08199	-29.66	-34.667	425-600	A6_4-6_012	Globigerinoides sacculifer	AII-60-10_425-600um_umb	AII-60-10_obj00019	245184	654.048	493.659	1967.18	AII-60-10_425-600um_sp
IP.308296	AII-60-10	IPE.08199	-29.66	-34.667	425-600	A6_4-6_017	Globigerinoides conglobatus	AII-60-10_425-600um_umb	AII-60-10_obj00011	317338	669.666	608.506	4316.97	AII-60-10_425-600um_sp	AII-60-10_obj00011	322641	683.351	607.556	4510.39
IP.308297	AII-60-10	IPE.08199	-29.66	-34.667	425-600	A6_4-6_019	Globigerinoides sacculifer	AII-60-10_425-600um_umb	AII-60-10_obj00013	220883	626.053	463.674	1846.97	AII-60-10_425-600um_sp
IP.308298	AII-60-10	IPE.08199	-29.66	-34.667	425-600	A6_4-6_024	Globigerinoides sacculifer	AII-60-10_425-600um_umb	AII-60-10_obj00026	310823	724.613	560.897	4542.48	AII-60-10_425-600um_sp	AII-60-10_obj00026	293282	727.192	525.615	2080.14
IP.308299	AII-60-10	IPE.08199	-29.66	-34.667	425-600	A6_4-6_025	Globigerinoides sacculifer	AII-60-10_425-600um_umb	AII-60-10_obj00023	227376	613.24	491.199	1831.42	AII-60-10_425-600um_sp	AII-60-10_obj00029	230889	614.857	492.655	3854.76
IP.308300	AII-60-10	IPE.08199	-29.66	-34.667	425-600	A6_4-6_026	Globigerinoides sacculifer	AII-60-10_425-600um_umb	AII-60-10_obj00025	226448	606.781	493.204	1823.66	AII-60-10_425-600um_sp	AII-60-10_obj00024	233214	616.824	497.84	1937.7
IP.308301	AII-60-10	IPE.08199	-29.66	-34.667	425-600	A6_4-6_028	Orbulina universa	AII-60-10_425-600um_umb	AII-60-10_obj00022	243256	559.131	554.169	1769.54	AII-60-10_425-600um_sp	AII-60-10_obj00021	242073	557.313	553.241	1763.68
IP.308302	AII-60-10	IPE.08199	-29.66	-34.667	425-600	A6_4-6_031	Orbulina universa	AII-60-10_425-600um_umb	AII-60-10_obj00032	201634	507.757	505.638	1599.85	AII-60-10_425-600um_sp	AII-60-10_obj00031	202071	507.77	506.723	1600.45
IP.308303	AII-60-10	IPE.08199	-29.66	-34.667	425-600	A6_4-6_033	Orbulina universa	AII-60-10_425-600um_umb	AII-60-10_obj00033	235542	564.295	531.991	3666.83	AII-60-10_425-600um_sp	AII-60-10_obj00033	222728	548.95	518.082	3844.8
IP.308305	AII-60-10	IPE.08199	-29.66	-34.667	425-600	A6_4-6_004	Globigerinoides conglobatus	AII-60-10_425-600um_umb	AII-60-10_obj00007	298745	677.273	567.142	4703.44	AII-60-10_425-600um_sp	AII-60-10_obj00007	298261	711.57	542.807	2533.51
IP.308306	AII-60-10	IPE.08199	-29.66	-34.667	425-600	A6_4-6_006	Globigerinoides conglobatus	AII-60-10_425-600um_umb	AII-60-10_obj00004	218492	561.276	499.217	3674.06	AII-60-10_425-600um_sp	AII-60-10_obj00003	218114	558.212	500.425	1748.89
IP.308307	AII-60-10	IPE.08199	-29.66	-34.667	425-600	A6_4-6_009	Globigerinoides conglobatus	AII-60-10_425-600um_umb	AII-60-10_obj00002	334125	682.488	629.891	2225.71	AII-60-10_425-600um_sp	AII-60-10_obj00009	307798	633.073	621.333	2092.47
IP.308308	CH82-21	IPE.08178	43.288	-29.83	300-425	CH_3-4_001	Globigerina bulloides	CH82_300-425um_N1-87_umb	CH82_obj00006	154664	499.995	407.172	1612.77	CH82_300-425um_N1-87_sp	CH82_obj00010	146791	487.629	393.015	1463.66
IP.308309	CH82-21	IPE.08178	43.288	-29.83	300-425	CH_3-4_001-2	Globorotalia truncatulinoides	CH82_300-425um_umb2	CH82_obj00001	226713	601.119	491.717	1851.33	CH82_300-425um_sp2
IP.308310	CH82-21	IPE.08178	43.288	-29.83	300-425	CH_3-4_010	Globorotalia inflata	CH82_300-425um_N1-87_umb	CH82_obj00001	230780	600.675	505.187	4200.6	CH82_300-425um_N1-87_sp	CH82_obj00002	208935	558.141	489.812	1963.81
IP.308311	CH82-21	IPE.08178	43.288	-29.83	300-425	CH_3-4_010-2	Globorotalia hirsuta	CH82_300-425um_umb2	CH82_obj00008	337028	695.092	624.966	2371.33	CH82_300-425um_sp2
IP.308312	CH82-21	IPE.08178	43.288	-29.83	300-425	CH_3-4_011	Globigerina bulloides	CH82_300-425um_N1-87_umb	CH82_obj00019	134809	452.21	385.926	1475.69	CH82_300-425um_N1-87_sp	CH82_obj00020	133867	449.162	388.31	1440.19
IP.308313	CH82-21	IPE.08178	43.288	-29.83	300-425	CH_3-4_012	Globigerinoides conglobatus	CH82_300-425um_N1-87_umb	CH82_obj00018	117545	406.924	373.212	1261.2	CH82_300-425um_N1-87_sp	CH82_obj00018	120362	423.855	370.297	2956.58
IP.308314	CH82-21	IPE.08178	43.288	-29.83	300-425	CH_3-4_012-2	Globorotalia truncatulinoides	CH82_300-425um_umb2	CH82_obj00015	249356	642.939	508.763	2152.67	CH82_300-425um_sp2
IP.308315	CH82-21	IPE.08178	43.288	-29.83	300-425	CH_3-4_013	Globigerina bulloides	CH82_300-425um_N1-87_umb	CH82_obj00015	152685	502.617	396.612	1519.49	CH82_300-425um_N1-87_sp	CH82_obj00019	147138	499.077	386.5	1500.4
IP.308316	CH82-21	IPE.08178	43.288	-29.83	300-425	CH_3-4_014	Globorotalia crassiformis	CH82_300-425um_N1-87_umb	CH82_obj00017	109262	415.784	338.277	1234.98	CH82_300-425um_N1-87_sp	CH82_obj00014	104841	401.376	336.922	2440.72
IP.308317	CH82-21	IPE.08178	43.288	-29.83	300-425	CH_3-4_015	Unknown	CH82_300-425um_N1-87_umb						CH82_300-425um_N1-87_sp	CH82_obj00016	150202	481.071	408.449	1478.12
IP.308319	CH82-21	IPE.08178	43.288	-29.83	300-425	CH_3-4_016	Globigerina bulloides	CH82_300-425um_N1-87_umb						CH82_300-425um_N1-87_sp	CH82_obj00013	119567	422.56	366.03	1346.18
IP.308320	CH82-21	IPE.08178	43.288	-29.83	300-425	CH_3-4_017	Globigerina bulloides	CH82_300-425um_N1-87_umb	CH82_obj00013	103236	376.484	355.704	2640.97	CH82_300-425um_N1-87_sp	CH82_obj00012	106811	400.182	350.53	1278.33
IP.308322	CH82-21	IPE.08178	43.288	-29.83	300-425	CH_3-4_018	Unknown	CH82_300-425um_N1-87_umb	CH82_obj00011	191484	540.879	475.425	2124.04	CH82_300-425um_N1-87_sp	CH82_obj00011
IP.308323	CH82-21	IPE.08178	43.288	-29.83	300-425	CH_3-4_019	Globigerina bulloides	CH82_300-425um_N1-87_umb	CH82_obj00014	155001	517.145	393.554	3540.78	CH82_300-425um_N1-87_sp	CH82_obj00017	151461	501.6	395.504	3346.56
IP.308324	CH82-21	IPE.08178	43.288	-29.83	300-425	CH_3-4_002	Globigerina bulloides	CH82_300-425um_N1-87_umb	CH82_obj00004	110635	407.838	352.771	1252.74	CH82_300-425um_N1-87_sp	CH82_obj00004	110721	410.01	348.635	1250.93
IP.308325	CH82-21	IPE.08178	43.288	-29.83	300-425	CH_3-4_020	Globorotalia hirsuta	CH82_300-425um_N1-87_umb	CH82_obj00012	185269	510.913	465.42	3899.49	CH82_300-425um_N1-87_sp	CH82_obj00015	183539	531.803	442.426	1697.06
IP.308326	CH82-21	IPE.08178	43.288	-29.83	300-425	CH_3-4_021	Globigerina bulloides	CH82_300-425um_N1-87_umb	CH82_obj00027	123359	459.066	357.793	1494.43	CH82_300-425um_N1-87_sp	CH82_obj00028	123996	469.154	345.162	3128.26
IP.308327	CH82-21	IPE.08178	43.288	-29.83	300-425	CH_3-4_022	Globorotalia crassiformis	CH82_300-425um_N1-87_umb	CH82_obj00021	102465	389.792	337.227	1168.08	CH82_300-425um_N1-87_sp	CH82_obj00025
IP.308328	CH82-21	IPE.08178	43.288	-29.83	300-425	CH_3-4_023	Globorotalia inflata	CH82_300-425um_N1-87_umb	CH82_obj00026	196854	545.13	468.487	1797.83	CH82_300-425um_N1-87_sp	CH82_obj00029	208343	543.463	497.089	1881.66
IP.308329	CH82-21	IPE.08178	43.288	-29.83	300-425	CH_3-4_024	Globorotalia crassiformis	CH82_300-425um_N1-87_umb	CH82_obj00022	145736	464.572	406.551	1419.94	CH82_300-425um_N1-87_sp	CH82_obj00027	143706	461.461	404.99	1429.11
IP.308330	CH82-21	IPE.08178	43.288	-29.83	300-425	CH_3-4_024-2	Globorotalia truncatulinoides	CH82_300-425um_umb2	CH82_obj00022	201883	565.805	464.157	3456.73	CH82_300-425um_sp2
IP.308331	CH82-21	IPE.08178	43.288	-29.83	300-425	CH_3-4_025	Globorotalia truncatulinoides	CH82_300-425um_N1-87_umb	CH82_obj00020	120475	418.641	369.574	1282.21	CH82_300-425um_N1-87_sp	CH82_obj00026
IP.308332	CH82-21	IPE.08178	43.288	-29.83	300-425	CH_3-4_026	Neogloboquadrina dutertrei	CH82_300-425um_N1-87_umb						CH82_300-425um_N1-87_sp	CH82_obj00035	130026	429.625	388.992	2737.93
IP.308333	CH82-21	IPE.08178	43.288	-29.83	300-425	CH_3-4_026-2	Globorotalia truncatulinoides	CH82_300-425um_umb2	CH82_obj00023	191922	540.923	467.081	1913.98	CH82_300-425um_sp2
IP.308334	CH82-21	IPE.08178	43.288	-29.83	300-425	CH_3-4_027	Globigerina bulloides	CH82_300-425um_N1-87_umb	CH82_obj00024	111897	406.024	358.623	1278.32	CH82_300-425um_N1-87_sp	CH82_obj00024	113068	418.951	352.865	1312.96
IP.308335	CH82-21	IPE.08178	43.288	-29.83	300-425	CH_3-4_028	Globigerina bulloides	CH82_300-425um_N1-87_umb	CH82_obj00028	105948	390.782	350.095	2713.55	CH82_300-425um_N1-87_sp	CH82_obj00022	103483	395.121	339.466	1213.12
IP.308336	CH82-21	IPE.08178	43.288	-29.83	300-425	CH_3-4_029	Globorotalia inflata	CH82_300-425um_N1-87_umb	CH82_obj00023	170954	526.772	424.789	1595.39	CH82_300-425um_N1-87_sp	CH82_obj00039	180229	534.107	437.444	1612.6
IP.308337	CH82-21	IPE.08178	43.288	-29.83	300-425	CH_3-4_003	Globigerina bulloides	CH82_300-425um_N1-87_umb	CH82_obj00002	111315	387.954	371.938	1265.85	CH82_300-425um_N1-87_sp	CH82_obj00006	109748	391.687	363.168	1294.52
IP.308338	CH82-21	IPE.08178	43.288	-29.83	300-425	CH_3-4_003-2	Globorotalia truncatulinoides	CH82_300-425um_umb2	CH82_obj00002	227212	593.813	493.831	3734.92	CH82_300-425um_sp2
IP.308339	CH82-21	IPE.08178	43.288	-29.83	300-425	CH_3-4_030	Globigerina bulloides	CH82_300-425um_N1-87_umb	CH82_obj00025	156064	501.049	405.453	3324.93	CH82_300-425um_N1-87_sp	CH82_obj00030	141197	476.693	388.474	1545.37
IP.308340	CH82-21	IPE.08178	43.288	-29.83	300-425	CH_3-4_031	Globigerinoides conglobatus	CH82_300-425um_N1-87_umb	CH82_obj00035	104911	386.474	347.533	1181.1	CH82_300-425um_N1-87_sp	CH82_obj00035	107298	389.364	352.541	1186.52
IP.308341	CH82-21	IPE.08178	43.288	-29.83	300-425	CH_3-4_032	pachyderma?	CH82_300-425um_N1-87_umb	CH82_obj00034	144510	436.097	426.953	1387.58	CH82_300-425um_N1-87_sp	CH82_obj00033	145650	438.2	428.795	1385.93
IP.308342	CH82-21	IPE.08178	43.288	-29.83	300-425	CH_3-4_033	Globigerina bulloides	CH82_300-425um_N1-87_umb	CH82_obj00038	98852	380.654	340.398	1208.55	CH82_300-425um_N1-87_sp	CH82_obj00040	100722	386.631	342.792	2663.14
IP.308343	CH82-21	IPE.08178	43.288	-29.83	300-425	CH_3-4_034	Unknown	CH82_300-425um_N1-87_umb	CH82_obj00036					CH82_300-425um_N1-87_sp	CH82_obj00037	106516	396.64	347.399	1213.62
IP.308344	CH82-21	IPE.08178	43.288	-29.83	300-425	CH_3-4_035	Globorotalia crassiformis	CH82_300-425um_N1-87_umb	CH82_obj00030	130898	444.558	380.359	1330.48	CH82_300-425um_N1-87_sp	CH82_obj00034	129085	448.668	369.528	1323.61
IP.308345	CH82-21	IPE.08178	43.288	-29.83	300-425	CH_3-4_036	Neogloboquadrina dutertrei	CH82_300-425um_N1-87_umb	CH82_obj00031	137054	447.142	394.398	1398.37	CH82_300-425um_N1-87_sp	CH82_obj00036	139776	449.069	401.889	1427.14
IP.308346	CH82-21	IPE.08178	43.288	-29.83	300-425	CH_3-4_037	Globorotalia inflata	CH82_300-425um_N1-87_umb	CH82_obj00029	168809	494.126	445.59	1707.28	CH82_300-425um_N1-87_sp	CH82_obj00049	181922	502.29	468.37	1638.79
IP.308347	CH82-21	IPE.08178	43.288	-29.83	300-425	CH_3-4_038	Globorotalia inflata	CH82_300-425um_N1-87_umb	CH82_obj00032	136487	466.079	382.522	1616.94	CH82_300-425um_N1-87_sp	CH82_obj00032	119121	436.723	353.929	1343.89
IP.308348	CH82-21	IPE.08178	43.288	-29.83	300-425	CH_3-4_039	Globigerina bulloides	CH82_300-425um_N1-87_umb	CH82_obj00033	136260	458.153	387.281	1506.24	CH82_300-425um_N1-87_sp	CH82_obj00039	130748	443.989	385.321	2909.89
IP.308349	CH82-21	IPE.08178	43.288	-29.83	300-425	CH_3-4_004	Globorotalia inflata	CH82_300-425um_N1-87_umb	CH82_obj00005	217073	587.485	480.275	1745.64	CH82_300-425um_N1-87_sp	CH82_obj00001
IP.308351	CH82-21	IPE.08178	43.288	-29.83	300-425	CH_3-4_040	Unknown	CH82_300-425um_N1-87_umb	CH82_obj00037	170475	494.029	442.444	1684.39	CH82_300-425um_N1-87_sp	CH82_obj00038
IP.308352	CH82-21	IPE.08178	43.288	-29.83	300-425	CH_3-4_041	Unknown	CH82_300-425um_N1-87_umb	CH82_obj00043	95429	357.93	345.702	1156.55	CH82_300-425um_N1-87_sp	CH82_obj00067	124496	410.445	395.087	1351.18
IP.308353	CH82-21	IPE.08178	43.288	-29.83	300-425	CH_3-4_042	Globigerinoides ruber	CH82_300-425um_N1-87_umb	CH82_obj00046					CH82_300-425um_N1-87_sp	CH82_obj00072	91614	365.11	322.433	1118.95
IP.308354	CH82-21	IPE.08178	43.288	-29.83	300-425	CH_3-4_043	Globigerina bulloides	CH82_300-425um_N1-87_umb	CH82_obj00039	109857	389.133	362.026	1203.03	CH82_300-425um_N1-87_sp	CH82_obj00044	111718	401.22	358.646	1221.84
IP.308355	CH82-21	IPE.08178	43.288	-29.83	300-425	CH_3-4_044	Globigerina bulloides	CH82_300-425um_N1-87_umb	CH82_obj00048	134333	491.582	359.072	2965.27	CH82_300-425um_N1-87_sp	CH82_obj00047	133251	491.469	355.322	1515.02
IP.308356	CH82-21	IPE.08178	43.288	-29.83	300-425	CH_3-4_045	Globorotalia crassiformis	CH82_300-425um_N1-87_umb	CH82_obj00040	105076	396.78	340.794	1202.2	CH82_300-425um_N1-87_sp	CH82_obj00049	102034	389.882	337.687	1206.4
IP.308357	CH82-21	IPE.08178	43.288	-29.83	300-425	CH_3-4_046	Globorotalia hirsuta	CH82_300-425um_N1-87_umb	CH82_obj00047	288035	660.941	558.451	1978.99	CH82_300-425um_N1-87_sp	CH82_obj00041
IP.308358	CH82-21	IPE.08178	43.288	-29.83	300-425	CH_3-4_047	Globigerina bulloides	CH82_300-425um_N1-87_umb	CH82_obj00045	101759	391.484	336.561	1270.06	CH82_300-425um_N1-87_sp	CH82_obj00048	108896	391.284	366.93	1301.35
IP.308359	CH82-21	IPE.08178	43.288	-29.83	300-425	CH_3-4_048	Globorotalia crassiformis	CH82_300-425um_N1-87_umb	CH82_obj00044	112089	429.373	339.27	2786.69	CH82_300-425um_N1-87_sp	CH82_obj00042	118738	424.724	359.113	1317.44
IP.308360	CH82-21	IPE.08178	43.288	-29.83	300-425	CH_3-4_049	Globorotalia crassiformis	CH82_300-425um_N1-87_umb	CH82_obj00041	114369	407.217	361.828	1339.16	CH82_300-425um_N1-87_sp	CH82_obj00043
IP.308361	CH82-21	IPE.08178	43.288	-29.83	300-425	CH_3-4_005	Neogloboquadrina dutertrei	CH82_300-425um_N1-87_umb	CH82_obj00007					CH82_300-425um_N1-87_sp	CH82_obj00008	159064	524.654	412.59	1675.39
IP.308362	CH82-21	IPE.08178	43.288	-29.83	300-425	CH_3-4_050	Globorotalia inflata	CH82_300-425um_N1-87_umb	CH82_obj00042	131927	456.546	371.537	3029.39	CH82_300-425um_N1-87_sp	CH82_obj00046	121726	415.854	376.339	1452.66
IP.308363	CH82-21	IPE.08178	43.288	-29.83	300-425	CH_3-4_051	Globorotalia crassiformis	CH82_300-425um_N1-87_umb	CH82_obj00050	126737	449.554	365.209	1350.77	CH82_300-425um_N1-87_sp	CH82_obj00058	126501	456.277	362.078	2733.12
IP.308364	CH82-21	IPE.08178	43.288	-29.83	300-425	CH_3-4_052	Globorotalia inflata	CH82_300-425um_N1-87_umb	CH82_obj00053					CH82_300-425um_N1-87_sp	CH82_obj00052	172147	517.183	428.197	1515.6
IP.308365	CH82-21	IPE.08178	43.288	-29.83	300-425	CH_3-4_053	quinquiloba?	CH82_300-425um_N1-87_umb	CH82_obj00054	104222	375.914	355.161	1166.73	CH82_300-425um_N1-87_sp	CH82_obj00054	97496	405.197	320.284	2718.05
IP.308366	CH82-21	IPE.08178	43.288	-29.83	300-425	CH_3-4_054	Globigerina bulloides	CH82_300-425um_N1-87_umb	CH82_obj00055	119155	420.235	377.665	1383.45	CH82_300-425um_N1-87_sp	CH82_obj00057	118214	424.229	367.154	1343.28
IP.308367	CH82-21	IPE.08178	43.288	-29.83	300-425	CH_3-4_055	Globorotalia inflata	CH82_300-425um_N1-87_umb	CH82_obj00058	143304	472.833	391.603	1406.76	CH82_300-425um_N1-87_sp	CH82_obj00059	141742	471.066	389.027	1409.52
IP.308368	CH82-21	IPE.08178	43.288	-29.83	300-425	CH_3-4_056	Globigerina bulloides	CH82_300-425um_N1-87_umb	CH82_obj00056	110657	414.518	345.856	1249.08	CH82_300-425um_N1-87_sp	CH82_obj00060	109102	414.305	342.837	1253.58
IP.308369	CH82-21	IPE.08178	43.288	-29.83	300-425	CH_3-4_057	Globigerina bulloides	CH82_300-425um_N1-87_umb	CH82_obj00057	120373	443.789	353.732	1374.32	CH82_300-425um_N1-87_sp	CH82_obj00055	114732	456.412	326.183	2792.11
IP.308370	CH82-21	IPE.08178	43.288	-29.83	300-425	CH_3-4_058	Globigerina bulloides	CH82_300-425um_N1-87_umb	CH82_obj00052	141222	487.56	375.735	1530.02	CH82_300-425um_N1-87_sp	CH82_obj00053	136040	483.377	364.351	1432.83
IP.308371	CH82-21	IPE.08178	43.288	-29.83	300-425	CH_3-4_059	Globigerina bulloides	CH82_300-425um_N1-87_umb	CH82_obj00051	120274	438.716	356.541	1345.5	CH82_300-425um_N1-87_sp	CH82_obj00056	115891	444.211	336.62	2680.62
IP.308372	CH82-21	IPE.08178	43.288	-29.83	300-425	CH_3-4_006	Globorotalia crassiformis	CH82_300-425um_N1-87_umb	CH82_obj00009	128841	433.724	384.555	1419.82	CH82_300-425um_N1-87_sp	CH82_obj00003	121006	416.17	377.039	1288.67
IP.308373	CH82-21	IPE.08178	43.288	-29.83	300-425	CH_3-4_060	Globorotalia inflata	CH82_300-425um_N1-87_umb	CH82_obj00049	172833	532.608	423.287	1818.21	CH82_300-425um_N1-87_sp	CH82_obj00051	166298	520.512	417.989	3463.85
IP.308374	CH82-21	IPE.08178	43.288	-29.83	300-425	CH_3-4_061	Globigerinoides conglobatus	CH82_300-425um_N1-87_umb	CH82_obj00062	127418	427.678	380.515	1337.99	CH82_300-425um_N1-87_sp	CH82_obj00061	130611	431.097	386.944	1307.81
IP.308375	CH82-21	IPE.08178	43.288	-29.83	300-425	CH_3-4_062	Globorotalia truncatulinoides	CH82_300-425um_N1-87_umb	CH82_obj00064	281903	645.552	573.315	3454.4	CH82_300-425um_N1-87_sp	CH82_obj00062	162483	494.017	439.003	1583.81
IP.308376	CH82-21	IPE.08178	43.288	-29.83	300-425	CH_3-4_063	Globorotalia inflata	CH82_300-425um_N1-87_umb	CH82_obj00063					CH82_300-425um_N1-87_sp	CH82_obj00063
IP.308377	CH82-21	IPE.08178	43.288	-29.83	300-425	CH_3-4_064	Globigerina bulloides	CH82_300-425um_N1-87_umb	CH82_obj00068	103880	388.979	344.185	1193.07	CH82_300-425um_N1-87_sp	CH82_obj00068	90613	375.181	309.197	2366.39
IP.308378	CH82-21	IPE.08178	43.288	-29.83	300-425	CH_3-4_065	Globigerinoides conglobatus	CH82_300-425um_N1-87_umb	CH82_obj00059	183365	504.43	467.052	3133.31	CH82_300-425um_N1-87_sp	CH82_obj00066	175173	492.211	455.468	1583.17
IP.308379	CH82-21	IPE.08178	43.288	-29.83	300-425	CH_3-4_066	Globorotalia crassiformis	CH82_300-425um_N1-87_umb	CH82_obj00065	107717	404.178	343.776	1196.07	CH82_300-425um_N1-87_sp	CH82_obj00064	108176	401.871	347.425	1199.33
IP.308380	CH82-21	IPE.08178	43.288	-29.83	300-425	CH_3-4_067	Globigerina bulloides	CH82_300-425um_N1-87_umb	CH82_obj00066	106208	400.677	343.182	1211.87	CH82_300-425um_N1-87_sp	CH82_obj00067	104526	404.926	335.686	1231.17
IP.308381	CH82-21	IPE.08178	43.288	-29.83	300-425	CH_3-4_068	Globorotalia inflata	CH82_300-425um_N1-87_umb	CH82_obj00067	135320	452.003	392.118	1384.88	CH82_300-425um_N1-87_sp	CH82_obj00069	133879	444.321	393.281	1413.4
IP.308382	CH82-21	IPE.08178	43.288	-29.83	300-425	CH_3-4_069	Globorotalia truncatulinoides	CH82_300-425um_N1-87_umb	CH82_obj00061	191553	557.923	448.023	3427.07	CH82_300-425um_N1-87_sp	CH82_obj00070	172999	516.515	445.346	1602.12
IP.308383	CH82-21	IPE.08178	43.288	-29.83	300-425	CH_3-4_007	Globigerinoides ruber	CH82_300-425um_N1-87_umb	CH82_obj00010	108344	413.048	340.249	1279.24	CH82_300-425um_N1-87_sp	CH82_obj00009	102748	395.27	337.005	1226.28
IP.308384	CH82-21	IPE.08178	43.288	-29.83	300-425	CH_3-4_070	Globigerina bulloides	CH82_300-425um_N1-87_umb	CH82_obj00060	119967	426.242	367.714	1338.11	CH82_300-425um_N1-87_sp	CH82_obj00065	114687	413.602	362.023	2788.8
IP.308386	CH82-21	IPE.08178	43.288	-29.83	300-425	CH_3-4_072	Globorotalia inflata	CH82_300-425um_N1-87_umb	CH82_obj00070	161622	496.763	425.677	3150.95	CH82_300-425um_N1-87_sp	CH82_obj00072
IP.308387	CH82-21	IPE.08178	43.288	-29.83	300-425	CH_3-4_073	Globigerina bulloides	CH82_300-425um_N1-87_umb	CH82_obj00074	114687	437.973	346.801	1345.13	CH82_300-425um_N1-87_sp	CH82_obj00073	112864	440.351	342.001	2740.88
IP.308388	CH82-21	IPE.08178	43.288	-29.83	300-425	CH_3-4_074	Globigerina bulloides	CH82_300-425um_N1-87_umb	CH82_obj00072	111263	423.741	344.584	1268.65	CH82_300-425um_N1-87_sp	CH82_obj00075	111281	422.687	341.972	1271.44
IP.308389	CH82-21	IPE.08178	43.288	-29.83	300-425	CH_3-4_075	Globigerina bulloides	CH82_300-425um_N1-87_umb	CH82_obj00075	128752	439.807	380.744	1369.18	CH82_300-425um_N1-87_sp	CH82_obj00074
IP.308390	CH82-21	IPE.08178	43.288	-29.83	300-425	CH_3-4_076	Globigerina bulloides	CH82_300-425um_N1-87_umb	CH82_obj00073	113319	421.453	354.943	1315.95	CH82_300-425um_N1-87_sp	CH82_obj00076	114728	404.309	373.848	1358.9
IP.308391	CH82-21	IPE.08178	43.288	-29.83	300-425	CH_3-4_077	Globorotalia inflata	CH82_300-425um_N1-87_umb	CH82_obj00071	153670	494.937	403.943	1453.58	CH82_300-425um_N1-87_sp	CH82_obj00077	152980	496.494	399.341	1446.82
IP.308392	CH82-21	IPE.08178	43.288	-29.83	300-425	CH_3-4_008	Neogloboquadrina dutertrei	CH82_300-425um_N1-87_umb	CH82_obj00009	138366	442.404	404.861	1448.59	CH82_300-425um_N1-87_sp	CH82_obj00009	142452	453.037	414.02	1593.09
IP.308393	CH82-21	IPE.08178	43.288	-29.83	300-425	CH_3-4_009	Neogloboquadrina dutertrei	CH82_300-425um_N1-87_umb	CH82_obj00003	163487	495.531	424.682	1712.81	CH82_300-425um_N1-87_sp	CH82_obj00015	170965	517.376	429.41	1674.84
IP.308394	CH82-21	IPE.08178	43.288	-29.83	425-600	CH_4_6_001	Globorotalia hirsuta	CH82_425-600um_1-76_umb	CH82_obj00010	360979	717.323	649.225	2268	CH82_425-600um_1-76_sp	converted_obj00007	302243	688.004	561.405	4115.7
IP.308395	CH82-21	IPE.08178	43.288	-29.83	425-600	CH_4-6_010	Globorotalia inflata	CH82_425-600um_1-76_umb	CH82_obj00002	324437	717.675	586.61	2140.96	CH82_425-600um_1-76_sp	converted_obj00004	227232	582.522	515.806	1966.84
IP.308396	CH82-21	IPE.08178	43.288	-29.83	425-600	CH_4-6_011	Globorotalia hirsuta	CH82_425-600um_1-76_umb	CH82_obj00018	408532	732.755	714.022	2386.97	CH82_425-600um_1-76_sp
IP.308397	CH82-21	IPE.08178	43.288	-29.83	425-600	CH_4-6_012	Globorotalia hirsuta	CH82_425-600um_1-76_umb	CH82_obj00015	430036	824.087	667.829	2435.49	CH82_425-600um_1-76_sp	converted_obj00018	328458	737.151	572.454	5531.88
IP.308398	CH82-21	IPE.08178	43.288	-29.83	425-600	CH_4-6_013	Globorotalia truncatulinoides	CH82_425-600um_1-76_umb	CH82_obj00016	363953	755.881	630.163	2471.96	CH82_425-600um_1-76_sp
IP.308399	CH82-21	IPE.08178	43.288	-29.83	425-600	CH_4-6_014	Globorotalia truncatulinoides	CH82_425-600um_1-76_umb	CH82_obj00019	343275	714.733	619.375	2266.37	CH82_425-600um_1-76_sp
IP.308400	CH82-21	IPE.08178	43.288	-29.83	425-600	CH_4-6_015	Globorotalia hirsuta	CH82_425-600um_1-76_umb	CH82_obj00020	367261	773.234	611.147	2326.42	CH82_425-600um_1-76_sp	converted_obj00016	262022	626.718	538.241	1965.73
IP.308401	CH82-21	IPE.08178	43.288	-29.83	425-600	CH_4-6_016	Globorotalia hirsuta	CH82_425-600um_1-76_umb	CH82_obj00017	361812	729.354	634.379	2206.98	CH82_425-600um_1-76_sp	converted_obj00014	279783	663.211	539.757	2006.06
IP.308402	CH82-21	IPE.08178	43.288	-29.83	425-600	CH_4-6_017	Globorotalia inflata	CH82_425-600um_1-76_umb	CH82_obj00013	314844	701.023	579.813	2126.26	CH82_425-600um_1-76_sp	converted_obj00011	268010	643.167	535.626	1914.05
IP.308403	CH82-21	IPE.08178	43.288	-29.83	425-600	CH_4-6_018	Globorotalia hirsuta	CH82_425-600um_1-76_umb	CH82_obj00014	393704	779.135	652.818	2479.8	CH82_425-600um_1-76_sp	converted_obj00012	405177	839.32	626.307	5234.05
IP.308404	CH82-21	IPE.08178	43.288	-29.83	425-600	CH_4-6_019	Globorotalia hirsuta	CH82_425-600um_1-76_umb	CH82_obj00012	313066	646.058	623.954	2111.58	CH82_425-600um_1-76_sp
IP.308405	CH82-21	IPE.08178	43.288	-29.83	425-600	CH_4-6_002	Globorotalia truncatulinoides	CH82_425-600um_1-76_umb	CH82_obj00008	278088	652.425	553.566	2136.32	CH82_425-600um_1-76_sp	converted_obj00008	216662	564.382	495.971	1776.33
IP.308406	CH82-21	IPE.08178	43.288	-29.83	425-600	CH_4-6_020	Globorotalia truncatulinoides	CH82_425-600um_1-76_umb	CH82_obj00011	326352	733.522	587.679	2268.84	CH82_425-600um_1-76_sp
IP.308407	CH82-21	IPE.08178	43.288	-29.83	425-600	CH_4-6_021	Globorotalia inflata	CH82_425-600um_1-76_umb	CH82_obj00030	282038	652.425	555.287	1985.38	CH82_425-600um_1-76_sp	converted_obj00030	229064	598.033	493.731	1913.53
IP.308408	CH82-21	IPE.08178	43.288	-29.83	425-600	CH_4-6_022	Globorotalia truncatulinoides	CH82_425-600um_1-76_umb	CH82_obj00029	416211	802.92	673.635	2555.05	CH82_425-600um_1-76_sp	converted_obj00028	385015	834.797	609.692	5347.19
IP.308409	CH82-21	IPE.08178	43.288	-29.83	425-600	CH_4-6_023	Globorotalia inflata	CH82_425-600um_1-76_umb	CH82_obj00027	292905	647.889	586.931	2070.55	CH82_425-600um_1-76_sp
IP.308410	CH82-21	IPE.08178	43.288	-29.83	425-600	CH_4-6_024	Globorotalia truncatulinoides	CH82_425-600um_1-76_umb	CH82_obj00025	403088	778.385	666.721	2589.2	CH82_425-600um_1-76_sp
IP.308411	CH82-21	IPE.08178	43.288	-29.83	425-600	CH_4-6_025	Globorotalia crassiformis	CH82_425-600um_1-76_umb	CH82_obj00026	301752	659.078	598.331	2146.29	CH82_425-600um_1-76_sp	converted_obj00029	257955	632.972	540.018	2159.99
IP.308412	CH82-21	IPE.08178	43.288	-29.83	425-600	CH_4-6_026	Globorotalia crassiformis	CH82_425-600um_1-76_umb	CH82_obj00027	279697	634.741	571.94	1982.26	CH82_425-600um_1-76_sp	converted_obj00023	251640	625.132	517.714	1857.55
IP.308413	CH82-21	IPE.08178	43.288	-29.83	425-600	CH_4-6_027	Globorotalia hirsuta	CH82_425-600um_1-76_umb	CH82_obj00023	424269	790.608	687.227	4840.58	CH82_425-600um_1-76_sp	converted_obj00022	365772	722.419	648.055	2225.54
IP.308415	CH82-21	IPE.08178	43.288	-29.83	425-600	CH_4-6_029	Globorotalia crassiformis	CH82_425-600um_1-76_umb	CH82_obj00021	250913	627.958	512.536	1884.09	CH82_425-600um_1-76_sp
IP.308416	CH82-21	IPE.08178	43.288	-29.83	425-600	CH_4-6_003	Globorotalia inflata	CH82_425-600um_1-76_umb	CH82_obj00009	313708	694.117	583.508	2092.63	CH82_425-600um_1-76_sp	converted_obj00006	225239	591.242	491.075	1759.11
IP.308418	CH82-21	IPE.08178	43.288	-29.83	425-600	CH_4-6_031	Orbulina universa	CH82_425-600um_1-76_umb	CH82_obj00040	252992	570.408	564.827	1809.52	CH82_425-600um_1-76_sp
IP.308419	CH82-21	IPE.08178	43.288	-29.83	425-600	CH_4-6_032	Globorotalia truncatulinoides	CH82_425-600um_1-76_umb	CH82_obj00039	249821	623.839	522.527	4070.2	CH82_425-600um_1-76_sp
IP.308420	CH82-21	IPE.08178	43.288	-29.83	425-600	CH_4-6_033	Globorotalia crassiformis	CH82_425-600um_1-76_umb	CH82_obj00035	252239	649.552	503.576	3908.3	CH82_425-600um_1-76_sp
IP.308421	CH82-21	IPE.08178	43.288	-29.83	425-600	CH_4-6_034	Globorotalia truncatulinoides	CH82_425-600um_1-76_umb	CH82_obj00038	321970	708.145	590.672	4717.07	CH82_425-600um_1-76_sp
IP.308423	CH82-21	IPE.08178	43.288	-29.83	425-600	CH_4-6_036	Globorotalia truncatulinoides	CH82_425-600um_1-76_umb	CH82_obj00036	320563	707.998	588.499	2153.81	CH82_425-600um_1-76_sp	converted_obj00033	338076	729.218	601.523	2471.14
IP.308424	CH82-21	IPE.08178	43.288	-29.83	425-600	CH_4-6_037	Globorotalia truncatulinoides	CH82_425-600um_1-76_umb	CH82_obj00031	342410	742.07	603.595	2244.6	CH82_425-600um_1-76_sp	converted_obj00034	330611	729.202	593.007	2213.48
IP.308425	CH82-21	IPE.08178	43.288	-29.83	425-600	CH_4-6_038	Globorotalia inflata	CH82_425-600um_1-76_umb	CH82_obj00034	330669	725.899	590.964	2146.06	CH82_425-600um_1-76_sp	converted_obj00037	236816	614.211	501.065	1814.36
IP.308426	CH82-21	IPE.08178	43.288	-29.83	425-600	CH_4-6_039	Globorotalia truncatulinoides	CH82_425-600um_1-76_umb	CH82_obj00032	359149	724.107	643.3	5053.85	CH82_425-600um_1-76_sp	converted_obj00032	319549	701.547	587.477	2211.28
IP.308427	CH82-21	IPE.08178	43.288	-29.83	425-600	CH_4-6_004	Globorotalia inflata	CH82_425-600um_1-76_umb	CH82_obj00006	300243	682.824	570.18	2165.23	CH82_425-600um_1-76_sp	converted_obj00010	217390	576.996	488.385	1759.18
IP.308428	CH82-21	IPE.08178	43.288	-29.83	425-600	CH_4-6_040	Globorotalia inflata	CH82_425-600um_1-76_umb	CH82_obj00033	279048	629.208	573.954	2008.79	CH82_425-600um_1-76_sp	converted_obj00035	243047	607.516	516.032	1828.29
IP.308429	CH82-21	IPE.08178	43.288	-29.83	425-600	CH_4-6_041	Globorotalia hirsuta	CH82_425-600um_1-76_umb	CH82_obj00050	343411	731.611	600.415	4331.79	CH82_425-600um_1-76_sp	converted_obj00045	318091	730.825	561.717	2426.2
IP.308430	CH82-21	IPE.08178	43.288	-29.83	425-600	CH_4-6_042	Globorotalia hirsuta	CH82_425-600um_1-76_umb	CH82_obj00046	395399	751.118	672.72	2315.93	CH82_425-600um_1-76_sp
IP.308431	CH82-21	IPE.08178	43.288	-29.83	425-600	CH_4-6_043	Globorotalia truncatulinoides	CH82_425-600um_1-76_umb	CH82_obj00048	425532	788.756	695.339	2589.6	CH82_425-600um_1-76_sp	converted_obj00052	310736	737.761	549.874	4791.22
IP.308432	CH82-21	IPE.08178	43.288	-29.83	425-600	CH_4-6_044	Globorotalia hirsuta	CH82_425-600um_1-76_umb	CH82_obj00049	214788	548.862	502.455	1745.86	CH82_425-600um_1-76_sp	converted_obj00050	248344	615.287	518.33	3962.37
IP.308433	CH82-21	IPE.08178	43.288	-29.83	425-600	CH_4-6_045	Globorotalia truncatulinoides	CH82_425-600um_1-76_umb	CH82_obj00045	268357	668.95	523.729	4001.3	CH82_425-600um_1-76_sp
IP.308434	CH82-21	IPE.08178	43.288	-29.83	425-600	CH_4-6_046	Globorotalia truncatulinoides	CH82_425-600um_1-76_umb	CH82_obj00044	382294	748.954	657.995	2427.23	CH82_425-600um_1-76_sp
IP.308435	CH82-21	IPE.08178	43.288	-29.83	425-600	CH_4-6_047	Globorotalia crassiformis	CH82_425-600um_1-76_umb	CH82_obj00042	248608	630.132	509.666	1872.18	CH82_425-600um_1-76_sp
IP.308436	CH82-21	IPE.08178	43.288	-29.83	425-600	CH_4-6_048	Globorotalia hirsuta	CH82_425-600um_1-76_umb	CH82_obj00047	431614	789.093	707.721	2457.08	CH82_425-600um_1-76_sp	converted_obj00043	331952	706.288	607.267	2139.7
IP.308437	CH82-21	IPE.08178	43.288	-29.83	425-600	CH_4-6_049	Globorotalia truncatulinoides	CH82_425-600um_1-76_umb	CH82_obj00044	382294	748.954	657.995	2427.23	CH82_425-600um_1-76_sp
IP.308438	CH82-21	IPE.08178	43.288	-29.83	425-600	CH_4-6_005	Globorotalia truncatulinoides	CH82_425-600um_1-76_umb	CH82_obj00003	340286	710.78	621.969	2247.83	CH82_425-600um_1-76_sp	converted_obj00005	311025	706.046	567.216	4617.64
IP.308439	CH82-21	IPE.08178	43.288	-29.83	425-600	CH_4-6_050	Globorotalia inflata	CH82_425-600um_1-76_umb	CH82_obj00041	360519	749.694	622.577	2256.12	CH82_425-600um_1-76_sp	converted_obj00046	314301	718.081	570.953	2119.14
IP.308440	CH82-21	IPE.08178	43.288	-29.83	425-600	CH_4-6_051	Globorotalia crassiformis	CH82_425-600um_1-76_umb	CH82_obj00059	262351	643.266	526.79	1925.13	CH82_425-600um_1-76_sp
IP.308441	CH82-21	IPE.08178	43.288	-29.83	425-600	CH_4-6_052	Globorotalia crassiformis	CH82_425-600um_1-76_umb	CH82_obj00051	321359	699.89	588.803	2098.59	CH82_425-600um_1-76_sp
IP.308442	CH82-21	IPE.08178	43.288	-29.83	425-600	CH_4-6_053	Globorotalia truncatulinoides	CH82_425-600um_1-76_umb	CH82_obj00058	385166	753.452	661.536	4653.56	CH82_425-600um_1-76_sp	converted_obj00056	220898	608.118	480.318	4839.06
IP.308444	CH82-21	IPE.08178	43.288	-29.83	425-600	CH_4-6_055	Globorotalia truncatulinoides	CH82_425-600um_1-76_umb						CH82_425-600um_1-76_sp	converted_obj00055	184651	560.815	433.225	1729.47
IP.308445	CH82-21	IPE.08178	43.288	-29.83	425-600	CH_4-6_056	Globorotalia hirsuta	CH82_425-600um_1-76_umb	CH82_obj00053	338588	688.637	631.318	2167.02	CH82_425-600um_1-76_sp	converted_obj00061	333460	741.956	575.288	4370.35
IP.308446	CH82-21	IPE.08178	43.288	-29.83	425-600	CH_4-6_057	Globorotalia inflata	CH82_425-600um_1-76_umb	CH82_obj00056	265595	626.494	552.525	1981.83	CH82_425-600um_1-76_sp	converted_obj00060	228882	589.381	503.85	1795.19
IP.308447	CH82-21	IPE.08178	43.288	-29.83	425-600	CH_4-6_058	Globorotalia truncatulinoides	CH82_425-600um_1-76_umb	CH82_obj00060	289344	694.807	546.321	2100.76	CH82_425-600um_1-76_sp	converted_obj00059	294268	694.928	568.475	2256.58
IP.308449	CH82-21	IPE.08178	43.288	-29.83	425-600	CH_4-6_006	Globorotalia truncatulinoides	CH82_425-600um_1-76_umb	CH82_obj00004	360052	745.771	636.919	5130.45	CH82_425-600um_1-76_sp
IP.308450	CH82-21	IPE.08178	43.288	-29.83	425-600	CH_4-6_060	Globorotalia hirsuta	CH82_425-600um_1-76_umb	CH82_obj00052	421000	842.477	640.094	2466.24	CH82_425-600um_1-76_sp	converted_obj00062	354830	745.609	610.819	2191.51
IP.308451	CH82-21	IPE.08178	43.288	-29.83	425-600	CH_4-6_061	Globorotalia truncatulinoides	CH82_425-600um_1-76_umb	CH82_obj00063	371693	780.285	616.247	2325.17	CH82_425-600um_1-76_sp	converted_obj00063	296025	709.697	540.853	4388.46
IP.308452	CH82-21	IPE.08178	43.288	-29.83	425-600	CH_4-6_062	Globorotalia hirsuta	CH82_425-600um_1-76_umb	CH82_obj00061	396357	755.526	690.186	2668.11	CH82_425-600um_1-76_sp
IP.308453	CH82-21	IPE.08178	43.288	-29.83	425-600	CH_4-6_063	Globorotalia inflata	CH82_425-600um_1-76_umb	CH82_obj00068	309935	694.739	576.913	2138.42	CH82_425-600um_1-76_sp
IP.308454	CH82-21	IPE.08178	43.288	-29.83	425-600	CH_4-6_064	Globorotalia crassiformis	CH82_425-600um_1-76_umb	CH82_obj00069	300777	675.588	574.797	2059.09	CH82_425-600um_1-76_sp	converted_obj00067	239173	643.752	491.92	5109.77
IP.308455	CH82-21	IPE.08178	43.288	-29.83	425-600	CH_4-6_065	Globorotalia truncatulinoides	CH82_425-600um_1-76_umb	CH82_obj00065	326236	721.209	591.334	2190.56	CH82_425-600um_1-76_sp	converted_obj00070	349206	750.539	603.239	4811.22
IP.308456	CH82-21	IPE.08178	43.288	-29.83	425-600	CH_4-6_066	Globorotalia hirsuta	CH82_425-600um_1-76_umb	CH82_obj00064	461702	848.153	697.315	2560.12	CH82_425-600um_1-76_sp
IP.308458	CH82-21	IPE.08178	43.288	-29.83	425-600	CH_4-6_068	Globorotalia hirsuta	CH82_425-600um_1-76_umb	CH82_obj00066	308975	653.186	607.062	2215.43	CH82_425-600um_1-76_sp
IP.308459	CH82-21	IPE.08178	43.288	-29.83	425-600	CH_4-6_069	Globorotalia truncatulinoides	CH82_425-600um_1-76_umb	CH82_obj00067	405339	796.414	658.47	2413.37	CH82_425-600um_1-76_sp	converted_obj00072	303633	748.725	532.49	2301.66
IP.308460	CH82-21	IPE.08178	43.288	-29.83	425-600	CH_4-6_007	Globorotalia crassiformis	CH82_425-600um_1-76_umb	CH82_obj00007	307630	692.22	579.186	2208.55	CH82_425-600um_1-76_sp	converted_obj00003	236426	619.832	491.298	1887.53
IP.308461	CH82-21	IPE.08178	43.288	-29.83	425-600	CH_4-6_070	Globorotalia truncatulinoides	CH82_425-600um_1-76_umb	CH82_obj00071	330120	736.084	586.54	4573.75	CH82_425-600um_1-76_sp	converted_obj00069	203441	590.84	464.708	1810.53
IP.308462	CH82-21	IPE.08178	43.288	-29.83	425-600	CH_4-6_071	Globorotalia truncatulinoides	CH82_425-600um_1-76_umb						CH82_425-600um_1-76_sp	converted_obj00078	227891	617.762	478.048	3753.4
IP.308463	CH82-21	IPE.08178	43.288	-29.83	425-600	CH_4-6_072	Globorotalia hirsuta	CH82_425-600um_1-76_umb	CH82_obj00072	372201	721.727	660.124	2280.76	CH82_425-600um_1-76_sp
IP.308464	CH82-21	IPE.08178	43.288	-29.83	425-600	CH_4-6_073	Globorotalia hirsuta	CH82_425-600um_1-76_umb	CH82_obj00074	368816	770.152	614.22	2282.38	CH82_425-600um_1-76_sp
IP.308465	CH82-21	IPE.08178	43.288	-29.83	425-600	CH_4-6_074	Globorotalia hirsuta	CH82_425-600um_1-76_umb	CH82_obj00075	473872	897.061	678.723	2636.63	CH82_425-600um_1-76_sp	converted_obj00074	346038	809.272	547.35	2232.68
IP.308466	CH82-21	IPE.08178	43.288	-29.83	425-600	CH_4-6_075	Globorotalia truncatulinoides	CH82_425-600um_1-76_umb	CH82_obj00076	353192	743.565	621.747	2414.18	CH82_425-600um_1-76_sp	converted_obj00076	251806	655.389	498.443	4233.44
IP.308467	CH82-21	IPE.08178	43.288	-29.83	425-600	CH_4-6_076	Globorotalia truncatulinoides	CH82_425-600um_1-76_umb	CH82_obj00077	325580	706.575	600.164	2258.51	CH82_425-600um_1-76_sp
IP.308468	CH82-21	IPE.08178	43.288	-29.83	425-600	CH_4-6_008	Globorotalia hirsuta	CH82_425-600um_1-76_umb	CH82_obj00005	327298	664.648	632.914	2218.79	CH82_425-600um_1-76_sp	converted_obj00002	300123	712.658	539.431	2165.57
IP.308469	CH82-21	IPE.08178	43.288	-29.83	425-600	CH_4-6_009	Globorotalia truncatulinoides	CH82_425-600um_1-76_umb	CH82_obj00001	402583	827.663	632.803	5803.34	CH82_425-600um_1-76_sp
IP.308470	EW9303-04	IPE.08231	64.71	-28.91	250-300	EW_2-3_001	Globigerina bulloides	EW9303_250-300um_1-80_umb	EW_obj00010	108684	405.909	346.969	2826.75	EW9303_250-300um_1-80_sp	EW9303_obj00010	89619	383.616	307.036	1324.49
IP.308471	EW9303-04	IPE.08231	64.71	-28.91	250-300	EW_2-3_010	Globigerina bulloides	EW9303_250-300um_1-80_umb						EW9303_250-300um_1-80_sp	EW9303_obj00005	91900	383.768	312.573	1191.06
IP.308472	EW9303-04	IPE.08231	64.71	-28.91	250-300	EW_2-3_011	Globigerina bulloides	EW9303_250-300um_1-80_umb	EW_obj00024	79508	360.747	289.025	1114.39	EW9303_250-300um_1-80_sp	EW9303_obj00017	77621	347.129	289.709	1054.86
IP.308473	EW9303-04	IPE.08231	64.71	-28.91	250-300	EW_2-3_012	Globigerina bulloides	EW9303_250-300um_1-80_umb	EW_obj00020	79626	344.341	305.149	1193.19	EW9303_250-300um_1-80_sp	EW9303_obj00019	69367	353.616	254.047	1015.49
IP.308474	EW9303-04	IPE.08231	64.71	-28.91	250-300	EW_2-3_013	Globigerina bulloides	EW9303_250-300um_1-80_umb	EW_obj00023	89934	350.581	334.965	1130.27	EW9303_250-300um_1-80_sp	EW9303_obj00020	92480	364.118	332.667	2341.59
IP.308476	EW9303-04	IPE.08231	64.71	-28.91	250-300	EW_2-3_015	Globigerina bulloides	EW9303_250-300um_1-80_umb	EW_obj00022	82243	345.812	311.239	1149.46	EW9303_250-300um_1-80_sp	EW9303_obj00016	83080	363.251	296.723	1124.55
IP.308477	EW9303-04	IPE.08231	64.71	-28.91	250-300	EW_2-3_016	Globigerina bulloides	EW9303_250-300um_1-80_umb	EW_obj00018	83149	354.131	305.531	1240.14	EW9303_250-300um_1-80_sp	EW9303_obj00012	72350	313.878	300.819	1069.7
IP.308478	EW9303-04	IPE.08231	64.71	-28.91	250-300	EW_2-3_017	Globigerina bulloides	EW9303_250-300um_1-80_umb						EW9303_250-300um_1-80_sp	EW9303_obj00014	95364	370.905	335.144	1178.39
IP.308479	EW9303-04	IPE.08231	64.71	-28.91	250-300	EW_2-3_018	Unknown	EW9303_250-300um_1-80_umb						EW9303_250-300um_1-80_sp	EW9303_obj00013	81334	361.027	298.629	1115.89
IP.308480	EW9303-04	IPE.08231	64.71	-28.91	250-300	EW_2-3_019	Globigerina bulloides	EW9303_250-300um_1-80_umb	EW_obj00017	99319	373.343	350.662	1251.96	EW9303_250-300um_1-80_sp	EW9303_obj00011	86420	352.212	320.706	1127.8
IP.308481	EW9303-04	IPE.08231	64.71	-28.91	250-300	EW_2-3_002	Globigerina bulloides	EW9303_250-300um_1-80_umb	EW_obj00009	84785	367.083	301.934	1128.34	EW9303_250-300um_1-80_sp	EW9303_obj00009	83049	358.2	303.141	1109.6
IP.308482	EW9303-04	IPE.08231	64.71	-28.91	250-300	EW_2-3_020	Globigerina bulloides	EW9303_250-300um_1-80_umb	EW_obj00016	98239	396.926	321.634	1247.66	EW9303_250-300um_1-80_sp	EW9303_obj00015	84448	375.085	294.699	1114.93
IP.308483	EW9303-04	IPE.08231	64.71	-28.91	250-300	EW_2-3_021	Globigerina bulloides	EW9303_250-300um_1-80_umb	EW_obj00035	77283	351.14	288.333	1050.53	EW9303_250-300um_1-80_sp	EW9303_obj00028	76187	350.413	284.872	1049.39
IP.308484	EW9303-04	IPE.08231	64.71	-28.91	250-300	EW_2-3_022	Globigerina bulloides	EW9303_250-300um_1-80_umb	EW_obj00030	80838	348.982	299.587	1051.24	EW9303_250-300um_1-80_sp	EW9303_obj00031	80783	357.78	293.894	1083.26
IP.308485	EW9303-04	IPE.08231	64.71	-28.91	250-300	EW_2-3_023	Globigerina bulloides	EW9303_250-300um_1-80_umb	EW_obj00029	102649	401.946	336.225	1284.79	EW9303_250-300um_1-80_sp	EW9303_obj00030	105598	403.829	341.301	1223.84
IP.308486	EW9303-04	IPE.08231	64.71	-28.91	250-300	EW_2-3_024	Globigerina falconensis	EW9303_250-300um_1-80_umb	EW_obj00032	75345	325.007	301.224	1030.01	EW9303_250-300um_1-80_sp	EW9303_obj00029	88860	346.669	331.17	2251.05
IP.308487	EW9303-04	IPE.08231	64.71	-28.91	250-300	EW_2-3_025	Unknown	EW9303_250-300um_1-80_umb	EW_obj00028	87086	359.657	311.739	1256.12	EW9303_250-300um_1-80_sp	EW9303_obj00027	82790	348.99	304.35	1046.48
IP.308488	EW9303-04	IPE.08231	64.71	-28.91	250-300	EW_2-3_026	Globigerina bulloides	EW9303_250-300um_1-80_umb	EW_obj00033	97580	406.189	316.065	1273.35	EW9303_250-300um_1-80_sp	EW9303_obj00022	97627	400.477	319.01	1195.06
IP.308489	EW9303-04	IPE.08231	64.71	-28.91	250-300	EW_2-3_027	Globigerina bulloides	EW9303_250-300um_1-80_umb	EW_obj00025	66484	334.008	257.844	960.018	EW9303_250-300um_1-80_sp	EW9303_obj00023	89690	356.026	329.496	1132
IP.308490	EW9303-04	IPE.08231	64.71	-28.91	250-300	EW_2-3_028	Globigerina bulloides	EW9303_250-300um_1-80_umb						EW9303_250-300um_1-80_sp	EW9303_obj00024	90879	367.517	320.396	1142.1
IP.308491	EW9303-04	IPE.08231	64.71	-28.91	250-300	EW_2-3_029	Globigerina bulloides	EW9303_250-300um_1-80_umb	EW_obj00036	78399	338.224	303.433	1100.91	EW9303_250-300um_1-80_sp	EW9303_obj00026	79480	330.093	312.187	1047.63
IP.308492	EW9303-04	IPE.08231	64.71	-28.91	250-300	EW_2-3_003	Neogloboquadrina pachyderma	EW9303_250-300um_1-80_umb	EW_obj00006	77366	331.58	298.859	1007.51	EW9303_250-300um_1-80_sp	EW9303_obj00008	75375	330.095	292.268	1007.63
IP.308493	EW9303-04	IPE.08231	64.71	-28.91	250-300	EW_2-3_030	Globigerina bulloides	EW9303_250-300um_1-80_umb	EW_obj00026	110841	422.79	340.166	1400.68	EW9303_250-300um_1-80_sp
IP.308494	EW9303-04	IPE.08231	64.71	-28.91	250-300	EW_2-3_031	Globigerina bulloides	EW9303_250-300um_1-80_umb	EW_obj00051	88357	373.464	309.23	1122.51	EW9303_250-300um_1-80_sp	EW9303_obj00041	91542	387.899	310.475	1169.13
IP.308495	EW9303-04	IPE.08231	64.71	-28.91	250-300	EW_2-3_032	Globigerina bulloides	EW9303_250-300um_1-80_umb	EW_obj00050	92818	368.55	327.49	1138.65	EW9303_250-300um_1-80_sp	EW9303_obj00038	94042	369.868	331.421	1152.13
IP.308496	EW9303-04	IPE.08231	64.71	-28.91	250-300	EW_2-3_033	Globigerina bulloides	EW9303_250-300um_1-80_umb	EW_obj00044	78567	327.409	315.682	1106.11	EW9303_250-300um_1-80_sp	EW9303_obj00040	87839	344.63	331.593	1097.05
IP.308497	EW9303-04	IPE.08231	64.71	-28.91	250-300	EW_2-3_034	Globigerina bulloides	EW9303_250-300um_1-80_umb	EW_obj00041	73038	326.652	290.691	1005.37	EW9303_250-300um_1-80_sp	EW9303_obj00039	87419	358.129	319.5	1118.67
IP.308498	EW9303-04	IPE.08231	64.71	-28.91	250-300	EW_2-3_035	Globigerina bulloides	EW9303_250-300um_1-80_umb	EW_obj00046	103195	411.862	326.587	1256.39	EW9303_250-300um_1-80_sp	EW9303_obj00033	115871	455.713	338.882	2866.41
IP.308499	EW9303-04	IPE.08231	64.71	-28.91	250-300	EW_2-3_036	Globigerina bulloides	EW9303_250-300um_1-80_umb	EW_obj00049	75594	346.464	285.94	1048.6	EW9303_250-300um_1-80_sp	EW9303_obj00037	81091	358.578	298.235	1087.35
IP.308500	EW9303-04	IPE.08231	64.71	-28.91	250-300	EW_2-3_037	Neogloboquadrina incompta	EW9303_250-300um_1-80_umb	EW_obj00043	62407	287.906	278.95	913.448	EW9303_250-300um_1-80_sp	EW9303_obj00034	74362	318.526	301.2	1002
IP.308501	EW9303-04	IPE.08231	64.71	-28.91	250-300	EW_2-3_038	Globigerina bulloides	EW9303_250-300um_1-80_umb	EW_obj00045	92358	425.583	280.02	1184.2	EW9303_250-300um_1-80_sp	EW9303_obj00035	102936	421.779	315.5	1233.92
IP.308502	EW9303-04	IPE.08231	64.71	-28.91	250-300	EW_2-3_039	Globigerina bulloides	EW9303_250-300um_1-80_umb	EW_obj00038	95373	396.214	311.802	1292.02	EW9303_250-300um_1-80_sp	EW9303_obj00032	88736	381.447	301.959	1118.03
IP.308503	EW9303-04	IPE.08231	64.71	-28.91	250-300	EW_2-3_004	Globigerina bulloides	EW9303_250-300um_1-80_umb						EW9303_250-300um_1-80_sp	EW9303_obj00007	83478	372.557	293.205	1121.18
IP.308504	EW9303-04	IPE.08231	64.71	-28.91	250-300	EW_2-3_040	Globigerina bulloides	EW9303_250-300um_1-80_umb	EW_obj00042	80363	351.772	297.13	1117.49	EW9303_250-300um_1-80_sp	EW9303_obj00036	78280	351.714	289.334	1082.11
IP.308505	EW9303-04	IPE.08231	64.71	-28.91	250-300	EW_2-3_041	Neogloboquadrina incompta	EW9303_250-300um_1-80_umb	EW_obj00066	69332	329.607	273.176	980.386	EW9303_250-300um_1-80_sp	EW9303_obj00051	81725	357.05	297.46	1078.87
IP.308506	EW9303-04	IPE.08231	64.71	-28.91	250-300	EW_2-3_042	Globigerina bulloides	EW9303_250-300um_1-80_umb	EW_obj00067	89374	348.346	333.046	1115.27	EW9303_250-300um_1-80_sp	EW9303_obj00050	95819	367.115	339.155	1166.1
IP.308507	EW9303-04	IPE.08231	64.71	-28.91	250-300	EW_2-3_043	Neogloboquadrina incompta	EW9303_250-300um_1-80_umb	EW_obj00065	86164	355.056	316.62	1107.7	EW9303_250-300um_1-80_sp	EW9303_obj00048	92874	375.409	320.202	1128.06
IP.308508	EW9303-04	IPE.08231	64.71	-28.91	250-300	EW_2-3_044	Unknown	EW9303_250-300um_1-80_umb	EW_obj00064	88656	375.94	304.566	1113.55	EW9303_250-300um_1-80_sp	EW9303_obj00043	96721	393.998	318.898	1189.52
IP.308509	EW9303-04	IPE.08231	64.71	-28.91	250-300	EW_2-3_045	Unknown	EW9303_250-300um_1-80_umb	EW_obj00070	73756	345.438	275.69	1113.28	EW9303_250-300um_1-80_sp	EW9303_obj00049	80935	340.138	305.616	1052.22
IP.308510	EW9303-04	IPE.08231	64.71	-28.91	250-300	EW_2-3_046	Globigerina bulloides	EW9303_250-300um_1-80_umb	EW_obj00068	71346	341.523	272.027	1098.87	EW9303_250-300um_1-80_sp	EW9303_obj00046	75755	353.751	279.258	1036.26
IP.308511	EW9303-04	IPE.08231	64.71	-28.91	250-300	EW_2-3_047	Globigerina bulloides	EW9303_250-300um_1-80_umb	EW_obj00058	88157	365.558	312.012	2336.09	EW9303_250-300um_1-80_sp	EW9303_obj00042	86719	366.753	307.624	1104.93
IP.308512	EW9303-04	IPE.08231	64.71	-28.91	250-300	EW_2-3_048	Globigerina falconensis	EW9303_250-300um_1-80_umb	EW_obj00059	70487	310.349	298.841	1048.36	EW9303_250-300um_1-80_sp	EW9303_obj00044	79976	335.327	312.076	1067.01
IP.308513	EW9303-04	IPE.08231	64.71	-28.91	250-300	EW_2-3_049	Globigerina falconensis	EW9303_250-300um_1-80_umb	EW_obj00061	87137	358.036	318.047	1212.35	EW9303_250-300um_1-80_sp	EW9303_obj00047	86105	358.964	314.51	1121.3	49
IP.308514	EW9303-04	IPE.08231	64.71	-28.91	250-300	EW_2-3_005	Globigerina bulloides	EW9303_250-300um_1-80_umb	EW_obj00008	97359	408.237	310.126	2780.77	EW9303_250-300um_1-80_sp	EW9303_obj00006	80736	371.733	282.856	1105.85
IP.308515	EW9303-04	IPE.08231	64.71	-28.91	250-300	EW_2-3_050	Globigerina bulloides	EW9303_250-300um_1-80_umb	EW_obj00062	98659	420.617	307.962	2623.98	EW9303_250-300um_1-80_sp	EW9303_obj00045	95164	404.198	307.001	1203.72
IP.308516	EW9303-04	IPE.08231	64.71	-28.91	250-300	EW_2-3_051	Unknown	EW9303_250-300um_1-80_umb	EW_obj00075	71942	320.08	289.598	990.654	EW9303_250-300um_1-80_sp	EW9303_obj00060	88955	372.492	308.832	1117.56
IP.308517	EW9303-04	IPE.08231	64.71	-28.91	250-300	EW_2-3_052	Globigerina bulloides	EW9303_250-300um_1-80_umb	EW_obj00073	101747	398.172	334.505	1328.98	EW9303_250-300um_1-80_sp	EW9303_obj00058	104347	420.831	318.446	1206.81
IP.308518	EW9303-04	IPE.08231	64.71	-28.91	250-300	EW_2-3_053	Globigerina bulloides	EW9303_250-300um_1-80_umb	EW_obj00081	78979	336.813	303.347	1044.16	EW9303_250-300um_1-80_sp	EW9303_obj00061	94380	363.978	335.261	1138.76
IP.308519	EW9303-04	IPE.08231	64.71	-28.91	250-300	EW_2-3_054	Globigerina bulloides	EW9303_250-300um_1-80_umb	EW_obj00078	93744	379.337	327.24	1240.38	EW9303_250-300um_1-80_sp	EW9303_obj00053	89993	385.503	301.136	1119.92
IP.308520	EW9303-04	IPE.08231	64.71	-28.91	250-300	EW_2-3_055	Unknown	EW9303_250-300um_1-80_umb	EW_obj00086	89123	353.716	330.714	1231.42	EW9303_250-300um_1-80_sp	EW9303_obj00057	86876	344.761	328.677	1100.71
IP.308521	EW9303-04	IPE.08231	64.71	-28.91	250-300	EW_2-3_056	Unknown	EW9303_250-300um_1-80_umb	EW_obj00083	86422	366.255	308.019	2528.28	EW9303_250-300um_1-80_sp	EW9303_obj00056	87010	370.97	304.338	1095.39
IP.308522	EW9303-04	IPE.08231	64.71	-28.91	250-300	EW_2-3_057	Globigerina bulloides	EW9303_250-300um_1-80_umb						EW9303_250-300um_1-80_sp	EW9303_obj00055	86944	353.969	318.826	1111.48
IP.308523	EW9303-04	IPE.08231	64.71	-28.91	250-300	EW_2-3_058	Globigerina bulloides	EW9303_250-300um_1-80_umb						EW9303_250-300um_1-80_sp	EW9303_obj00052	98259	387.987	334.321	1220.92
IP.308524	EW9303-04	IPE.08231	64.71	-28.91	250-300	EW_2-3_059	Neogloboquadrina pachyderma	EW9303_250-300um_1-80_umb	EW_obj00080	65488	304.872	277.346	966.868	EW9303_250-300um_1-80_sp	EW9303_obj00059	76706	319.487	312.833	1034.82
IP.308525	EW9303-04	IPE.08231	64.71	-28.91	250-300	EW_2-3_006	Neogloboquadrina incompta	EW9303_250-300um_1-80_umb	EW_obj00005	70529	314.311	289.826	1009.83	EW9303_250-300um_1-80_sp	EW9303_obj00004	75959	336.09	290.97	1023.74
IP.308526	EW9303-04	IPE.08231	64.71	-28.91	250-300	EW_2-3_060	Globigerinita glutinata	EW9303_250-300um_1-80_umb	EW_obj00076	80002	371.877	280.113	2500.81	EW9303_250-300um_1-80_sp	EW9303_obj00054	82335	369.791	288.638	1079.3
IP.308527	EW9303-04	IPE.08231	64.71	-28.91	250-300	EW_2-3_061	Globigerina bulloides	EW9303_250-300um_1-80_umb	EW_obj00088	88603	372.445	310.216	1133.85	EW9303_250-300um_1-80_sp	EW9303_obj00067	95528	389.568	321.469	1187.04
IP.308528	EW9303-04	IPE.08231	64.71	-28.91	250-300	EW_2-3_062	Globigerina bulloides	EW9303_250-300um_1-80_umb	EW_obj00089	80163	363.885	286.371	1068.02	EW9303_250-300um_1-80_sp	EW9303_obj00062	90427	386.332	304.214	1137.45
IP.308529	EW9303-04	IPE.08231	64.71	-28.91	250-300	EW_2-3_063	Globigerina bulloides	EW9303_250-300um_1-80_umb	EW_obj00091	90203	376.023	311.752	1139.87	EW9303_250-300um_1-80_sp	EW9303_obj00066	100614	397.099	328.818	1203.89
IP.308530	EW9303-04	IPE.08231	64.71	-28.91	250-300	EW_2-3_064	Globigerina bulloides	EW9303_250-300um_1-80_umb						EW9303_250-300um_1-80_sp	EW9303_obj00068	113535	421.443	350.424	1267.35
IP.308531	EW9303-04	IPE.08231	64.71	-28.91	250-300	EW_2-3_065	Neogloboquadrina incompta	EW9303_250-300um_1-80_umb	EW_obj00092	81576	341.086	309.798	1138.18	EW9303_250-300um_1-80_sp	EW9303_obj00069	82364	353.467	301.342	1067.97
IP.308532	EW9303-04	IPE.08231	64.71	-28.91	250-300	EW_2-3_066	Neogloboquadrina incompta	EW9303_250-300um_1-80_umb	EW_obj00094	67300	312.505	276.112	949.03	EW9303_250-300um_1-80_sp	EW9303_obj00070	77194	329.91	299.569	1007.65
IP.308533	EW9303-04	IPE.08231	64.71	-28.91	250-300	EW_2-3_067	Globigerina bulloides	EW9303_250-300um_1-80_umb	EW_obj00093	80855	343.606	307.415	1104.68	EW9303_250-300um_1-80_sp	EW9303_obj00065	84789	362.444	302.677	1091.57
IP.308534	EW9303-04	IPE.08231	64.71	-28.91	250-300	EW_2-3_068	Globigerina bulloides	EW9303_250-300um_1-80_umb	EW_obj00095	97135	407.631	311.39	2502.25	EW9303_250-300um_1-80_sp	EW9303_obj00071	97445	389.286	324.956	1168.14
IP.308535	EW9303-04	IPE.08231	64.71	-28.91	250-300	EW_2-3_069	Globigerina bulloides	EW9303_250-300um_1-80_umb						EW9303_250-300um_1-80_sp	EW9303_obj00064	82491	362.668	298.398	1091.56
IP.308536	EW9303-04	IPE.08231	64.71	-28.91	250-300	EW_2-3_007	Unknown	EW9303_250-300um_1-80_umb	EW_obj00002	78512	347.238	290.746	1081.3	EW9303_250-300um_1-80_sp	EW9303_obj00002	68654	322.367	275.191	990.552
IP.308537	EW9303-04	IPE.08231	64.71	-28.91	250-300	EW_2-3_070	Unknown	EW9303_250-300um_1-80_umb	EW_obj00096	87179	368.672	307.137	2340.66	EW9303_250-300um_1-80_sp	EW9303_obj00063	90828	375.474	313.097	1137.73
IP.308538	EW9303-04	IPE.08231	64.71	-28.91	250-300	EW_2-3_008	Globigerina bulloides	EW9303_250-300um_1-80_umb						EW9303_250-300um_1-80_sp	EW9303_obj00001	88882	355.372	325.977	1145.7
IP.308539	EW9303-04	IPE.08231	64.71	-28.91	250-300	EW_2-3_009	Globigerina bulloides	EW9303_250-300um_1-80_umb						EW9303_250-300um_1-80_sp	EW9303_obj00003	91475	387.93	307.938	1169.93
IP.308540	EW9303-04	IPE.08231	64.71	-28.91	300-425	EW_3-4_001	Globorotalia inflata	EW9303_300-425um_1-78_umb	300-425_obj00010	154988	482.883	416.856	3305.71	EW9303_300-425um_1-78_sp	EW9303_obj00008	138157	473.755	376.25	1396.14
IP.308541	EW9303-04	IPE.08231	64.71	-28.91	300-425	EW_3-4_010	Globigerina bulloides	EW9303_300-425um_1-78_umb	300-425_obj00006	103056	391.846	343.784	1242.6	EW9303_300-425um_1-78_sp	EW9303_obj00010	112825	410.606	358.085	1298.96
IP.308542	EW9303-04	IPE.08231	64.71	-28.91	300-425	EW_3-4_011	Globigerina bulloides	EW9303_300-425um_1-78_umb	300-425_obj00012	122823	438.283	369.535	1393.6	EW9303_300-425um_1-78_sp	EW9303_obj00013	115376	428.957	351.786	1357.18
IP.308543	EW9303-04	IPE.08231	64.71	-28.91	300-425	EW_3-4_012	Globigerina bulloides	EW9303_300-425um_1-78_umb	300-425_obj00018	116880	432.206	352.119	2870.48	EW9303_300-425um_1-78_sp	EW9303_obj00017	106317	420.804	330.359	1293.53
IP.308544	EW9303-04	IPE.08231	64.71	-28.91	300-425	EW_3-4_013	Globigerina bulloides	EW9303_300-425um_1-78_umb	300-425_obj00014	113618	418.547	350.193	2741.09	EW9303_300-425um_1-78_sp	EW9303_obj00018	125086	432.697	373.465	1350.77
IP.308545	EW9303-04	IPE.08231	64.71	-28.91	300-425	EW_3-4_014	Globigerina bulloides	EW9303_300-425um_1-78_umb	300-425_obj00013					EW9303_300-425um_1-78_sp	EW9303_obj00015	114533	422.395	353.685	1316.38
IP.308546	EW9303-04	IPE.08231	64.71	-28.91	300-425	EW_3-4_015	Globigerina bulloides	EW9303_300-425um_1-78_umb	300-425_obj00016					EW9303_300-425um_1-78_sp	EW9303_obj00014	109915	391.951	365.53	1269.42
IP.308547	EW9303-04	IPE.08231	64.71	-28.91	300-425	EW_3-4_016	Unknown	EW9303_300-425um_1-78_umb	300-425_obj00015	164638	494.306	427.711	1567.21	EW9303_300-425um_1-78_sp	EW9303_obj00011	163259	505.504	413.479	1465.41
IP.308548	EW9303-04	IPE.08231	64.71	-28.91	300-425	EW_3-4_017	Globigerina bulloides	EW9303_300-425um_1-78_umb	300-425_obj00019					EW9303_300-425um_1-78_sp	EW9303_obj00012	122867	445.168	357.573	2709.01
IP.308549	EW9303-04	IPE.08231	64.71	-28.91	300-425	EW_3-4_018	Globigerina bulloides	EW9303_300-425um_1-78_umb	300-425_obj00020	112444	433.337	338.59	1276.38	EW9303_300-425um_1-78_sp	EW9303_obj00019	118010	444.554	345.818	1316.66
IP.308550	EW9303-04	IPE.08231	64.71	-28.91	300-425	EW_3-4_019	Globigerina bulloides	EW9303_300-425um_1-78_umb	300-425_obj00023	106721	412.546	340.718	1243.74	EW9303_300-425um_1-78_sp	EW9303_obj00016	110847	422.951	349.6	1318.19
IP.308551	EW9303-04	IPE.08231	64.71	-28.91	300-425	EW_3-4_002	Unknown	EW9303_300-425um_1-78_umb	300-425_obj00009	103154	389.364	342.152	1198.2	EW9303_300-425um_1-78_sp	EW9303_obj00007	103846	383.359	350.274	1200.62
IP.308552	EW9303-04	IPE.08231	64.71	-28.91	300-425	EW_3-4_020	Globigerina bulloides	EW9303_300-425um_1-78_umb	300-425_obj00017	133403	470.882	370.883	2953.48	EW9303_300-425um_1-78_sp	EW9303_obj00020	140246	471.202	400.092	1785.75
IP.308553	EW9303-04	IPE.08231	64.71	-28.91	300-425	EW_3-4_021	Globigerina bulloides	EW9303_300-425um_1-78_umb	300-425_obj00028	130086	451.497	374.236	2850.75	EW9303_300-425um_1-78_sp	EW9303_obj00030	130960	458.097	374.623	2803.73
IP.308554	EW9303-04	IPE.08231	64.71	-28.91	300-425	EW_3-4_022	Globigerinella siphonifera	EW9303_300-425um_1-78_umb	300-425_obj00027	114942	413.955	364.209	2670.6	EW9303_300-425um_1-78_sp	EW9303_obj00025	119649	419.814	371.533	1307.5
IP.308555	EW9303-04	IPE.08231	64.71	-28.91	300-425	EW_3-4_023	Globigerina bulloides	EW9303_300-425um_1-78_umb	300-425_obj00025					EW9303_300-425um_1-78_sp	EW9303_obj00027	140494	454.419	403.452	1419.46
IP.308556	EW9303-04	IPE.08231	64.71	-28.91	300-425	EW_3-4_024	Globigerina bulloides	EW9303_300-425um_1-78_umb	300-425_obj00024	115082	452.579	326.679	1340.87	EW9303_300-425um_1-78_sp	EW9303_obj00022	132740	473.82	361.045	1377.03
IP.308557	EW9303-04	IPE.08231	64.71	-28.91	300-425	EW_3-4_025	Globigerina bulloides	EW9303_300-425um_1-78_umb	300-425_obj00026					EW9303_300-425um_1-78_sp	EW9303_obj00021	195236	565.052	452.908	1719.75
IP.308558	EW9303-04	IPE.08231	64.71	-28.91	300-425	EW_3-4_026	Globigerina bulloides	EW9303_300-425um_1-78_umb	300-425_obj00030	155644	500.806	404.483	3380.06	EW9303_300-425um_1-78_sp	EW9303_obj00023	153867	507.633	396.983	1537.84
IP.308559	EW9303-04	IPE.08231	64.71	-28.91	300-425	EW_3-4_027	Globigerina bulloides	EW9303_300-425um_1-78_umb	300-425_obj00032	107417	398.189	357.041	1347.72	EW9303_300-425um_1-78_sp	EW9303_obj00026	113319	413.829	358.708	1284.75
IP.308560	EW9303-04	IPE.08231	64.71	-28.91	300-425	EW_3-4_028	Globigerina bulloides	EW9303_300-425um_1-78_umb	300-425_obj00034	114298	398.112	376.009	2865.87	EW9303_300-425um_1-78_sp	EW9303_obj00028	126346	422.168	391.078	1509.4
IP.308561	EW9303-04	IPE.08231	64.71	-28.91	300-425	EW_3-4_029	Globigerina bulloides	EW9303_300-425um_1-78_umb	300-425_obj00031	94909	379.627	325.038	1164.28	EW9303_300-425um_1-78_sp	EW9303_obj00029	112385	412.569	355.031	1297.3
IP.308562	EW9303-04	IPE.08231	64.71	-28.91	300-425	EW_3-4_003	Globigerina bulloides	EW9303_300-425um_1-78_umb	300-425_obj00005	116493	438.816	346.688	1431.61	EW9303_300-425um_1-78_sp	EW9303_obj00009	106590	425.695	324.928	1267.58
IP.308563	EW9303-04	IPE.08231	64.71	-28.91	300-425	EW_3-4_030	Globigerina bulloides	EW9303_300-425um_1-78_umb	300-425_obj00033	116782	399.236	378.404	1274.46	EW9303_300-425um_1-78_sp	EW9303_obj00024	134765	444.367	396.028	1397.12
IP.308564	EW9303-04	IPE.08231	64.71	-28.91	300-425	EW_3-4_031	Globigerina bulloides	EW9303_300-425um_1-78_umb	300-425_obj00039	108963	435.203	328.043	1274.7	EW9303_300-425um_1-78_sp	EW9303_obj00041	124859	454.361	355.575	1376.89
IP.308565	EW9303-04	IPE.08231	64.71	-28.91	300-425	EW_3-4_032	Globigerina bulloides	EW9303_300-425um_1-78_umb	300-425_obj00038	86515	344.021	327.583	1139.7	EW9303_300-425um_1-78_sp	EW9303_obj00035	87500	353.93	319.712	1099.79
IP.308566	EW9303-04	IPE.08231	64.71	-28.91	300-425	EW_3-4_033	Globigerina bulloides	EW9303_300-425um_1-78_umb	300-425_obj00036	92984	383.967	317.126	1196.71	EW9303_300-425um_1-78_sp	EW9303_obj00032	93137	387.056	313.315	1158.49
IP.308567	EW9303-04	IPE.08231	64.71	-28.91	300-425	EW_3-4_034	Globigerina bulloides	EW9303_300-425um_1-78_umb	300-425_obj00037	124091	438.457	371.698	1422.01	EW9303_300-425um_1-78_sp	EW9303_obj00031	127843	443.932	374.876	1353.84
IP.308568	EW9303-04	IPE.08231	64.71	-28.91	300-425	EW_3-4_035	Globigerina bulloides	EW9303_300-425um_1-78_umb	300-425_obj00040	144902	458.059	411.551	3262.13	EW9303_300-425um_1-78_sp	EW9303_obj00033	144160	465.664	401.401	1442.13
IP.308569	EW9303-04	IPE.08231	64.71	-28.91	300-425	EW_3-4_036	Globigerina bulloides	EW9303_300-425um_1-78_umb	300-425_obj00041	109182	390.068	365.434	1254.37	EW9303_300-425um_1-78_sp	EW9303_obj00034	122067	414.988	382.124	1322.51
IP.308570	EW9303-04	IPE.08231	64.71	-28.91	300-425	EW_3-4_037	Globigerina bulloides	EW9303_300-425um_1-78_umb	300-425_obj00042	110907	419.673	341.653	1269.29	EW9303_300-425um_1-78_sp	EW9303_obj00037	102407	427.242	308.112	1202.15
IP.308571	EW9303-04	IPE.08231	64.71	-28.91	300-425	EW_3-4_038	Globigerina bulloides	EW9303_300-425um_1-78_umb	300-425_obj00047	106057	415.364	334.766	1252.17	EW9303_300-425um_1-78_sp	EW9303_obj00038	119362	417.397	371.888	2643.18
IP.308572	EW9303-04	IPE.08231	64.71	-28.91	300-425	EW_3-4_039	Globigerina bulloides	EW9303_300-425um_1-78_umb	300-425_obj00046	136482	451.535	395.427	1395.88	EW9303_300-425um_1-78_sp	EW9303_obj00042	135763	438.803	399.27	1383.81
IP.308573	EW9303-04	IPE.08231	64.71	-28.91	300-425	EW_3-4_004	Globigerina bulloides	EW9303_300-425um_1-78_umb	300-425_obj00008	134876	457.973	384.908	1560.27	EW9303_300-425um_1-78_sp	EW9303_obj00006	124279	437.104	370.439	1375.71
IP.308574	EW9303-04	IPE.08231	64.71	-28.91	300-425	EW_3-4_040	Globigerinoides ruber	EW9303_300-425um_1-78_umb	300-425_obj00043	113243	508.472	319.709	1627.03	EW9303_300-425um_1-78_sp	EW9303_obj00039	126661	446.509	366.779	1378.5
IP.308575	EW9303-04	IPE.08231	64.71	-28.91	300-425	EW_3-4_041	Globigerina bulloides	EW9303_300-425um_1-78_umb	300-425_obj00050	101417	401.053	328.707	1191.32	EW9303_300-425um_1-78_sp	EW9303_obj00048	132855	453.373	382.622	1391.84
IP.308576	EW9303-04	IPE.08231	64.71	-28.91	300-425	EW_3-4_042	Globigerina bulloides	EW9303_300-425um_1-78_umb						EW9303_300-425um_1-78_sp	EW9303_obj00049	120082	440.394	356.994	1316.54
IP.308577	EW9303-04	IPE.08231	64.71	-28.91	300-425	EW_3-4_043	Globigerina bulloides	EW9303_300-425um_1-78_umb	300-425_obj00049	119636	439	358.702	2789	EW9303_300-425um_1-78_sp	EW9303_obj00047	153507	479.82	417.201	1517.26
IP.308578	EW9303-04	IPE.08231	64.71	-28.91	300-425	EW_3-4_044	Globigerina bulloides	EW9303_300-425um_1-78_umb	300-425_obj00053	118122	438.237	352.838	1455.22	EW9303_300-425um_1-78_sp	EW9303_obj00043	115506	447.692	338.089	1308.69
IP.308579	EW9303-04	IPE.08231	64.71	-28.91	300-425	EW_3-4_045	Globigerina bulloides	EW9303_300-425um_1-78_umb	300-425_obj00055	89524	389.035	296.392	1164.52	EW9303_300-425um_1-78_sp	EW9303_obj00046	104439	407.98	330.964	1206.18
IP.308580	EW9303-04	IPE.08231	64.71	-28.91	300-425	EW_3-4_046	Unknown	EW9303_300-425um_1-78_umb	300-425_obj00056	128284	435.833	379.055	1346.96	EW9303_300-425um_1-78_sp	EW9303_obj00044	108211	422.486	330.215	1241.6
IP.308581	EW9303-04	IPE.08231	64.71	-28.91	300-425	EW_3-4_047	Globigerina bulloides	EW9303_300-425um_1-78_umb	300-425_obj00058	113316	444.253	333.857	1299.91	EW9303_300-425um_1-78_sp	EW9303_obj00045	110653	437.818	324.907	1246.84
IP.308582	EW9303-04	IPE.08231	64.71	-28.91	300-425	EW_3-4_048	Globigerina bulloides	EW9303_300-425um_1-78_umb	300-425_obj00054	129047	446.945	375.625	1366.63	EW9303_300-425um_1-78_sp	EW9303_obj00050	109388	413.97	346.595	1254.24
IP.308583	EW9303-04	IPE.08231	64.71	-28.91	300-425	EW_3-4_049	Globigerina bulloides	EW9303_300-425um_1-78_umb	300-425_obj00059	108432	414.528	341.955	1247.24	EW9303_300-425um_1-78_sp	EW9303_obj00052	214375	578.868	481.313	1770.8
IP.308584	EW9303-04	IPE.08231	64.71	-28.91	300-425	EW_3-4_005	Globigerina bulloides	EW9303_300-425um_1-78_umb	300-425_obj00007	136542	475.398	377.42	1541.04	EW9303_300-425um_1-78_sp	EW9303_obj00003	135930	449.151	393.613	1452.65
IP.308585	EW9303-04	IPE.08231	64.71	-28.91	300-425	EW_3-4_050	Globigerina bulloides	EW9303_300-425um_1-78_umb						EW9303_300-425um_1-78_sp	EW9303_obj00051	120638	437.862	356.509	1319.79
IP.308586	EW9303-04	IPE.08231	64.71	-28.91	300-425	EW_3-4_051	Globigerina bulloides	EW9303_300-425um_1-78_umb	300-425_obj00057	130542	425.591	397.178	2924.36	EW9303_300-425um_1-78_sp	EW9303_obj00060	135980	453.514	393.963	1431.42
IP.308587	EW9303-04	IPE.08231	64.71	-28.91	300-425	EW_3-4_052	Globigerina bulloides	EW9303_300-425um_1-78_umb	300-425_obj00061	125227	447.013	360.366	2882.81	EW9303_300-425um_1-78_sp	EW9303_obj00055	111471	424.057	343.455	1255.14
IP.308588	EW9303-04	IPE.08231	64.71	-28.91	300-425	EW_3-4_053	Globigerina bulloides	EW9303_300-425um_1-78_umb	300-425_obj00062	113672	411.481	360.879	1394.5	EW9303_300-425um_1-78_sp	EW9303_obj00056	160437	506.012	414.449	1554.55
IP.308589	EW9303-04	IPE.08231	64.71	-28.91	300-425	EW_3-4_054	Globigerina bulloides	EW9303_300-425um_1-78_umb	300-425_obj00065	108013	419.321	332.277	1281.16	EW9303_300-425um_1-78_sp	EW9303_obj00053	126179	424.365	386.236	1359.09
IP.308590	EW9303-04	IPE.08231	64.71	-28.91	300-425	EW_3-4_055	Globigerina bulloides	EW9303_300-425um_1-78_umb	300-425_obj00067	115060	425.022	349.316	2731.16	EW9303_300-425um_1-78_sp	EW9303_obj00054	127127	441.863	371.64	1339.6
IP.308591	EW9303-04	IPE.08231	64.71	-28.91	300-425	EW_3-4_056	Globigerina bulloides	EW9303_300-425um_1-78_umb	300-425_obj00071	68867	335.812	267.76	992.334	EW9303_300-425um_1-78_sp	EW9303_obj00057	133741	429.315	408.373	1399.58
IP.308592	EW9303-04	IPE.08231	64.71	-28.91	300-425	EW_3-4_057	Globigerina bulloides	EW9303_300-425um_1-78_umb						EW9303_300-425um_1-78_sp	EW9303_obj00061	114250	419.558	354.866	1271.55
IP.308593	EW9303-04	IPE.08231	64.71	-28.91	300-425	EW_3-4_058	Globigerina bulloides	EW9303_300-425um_1-78_umb	300-425_obj00069	122880	409.978	390.66	1336.02	EW9303_300-425um_1-78_sp	EW9303_obj00058	123223	424.026	375.22	1328.5
IP.308594	EW9303-04	IPE.08231	64.71	-28.91	300-425	EW_3-4_059	Unknown	EW9303_300-425um_1-78_umb	300-425_obj00070	135214	440.482	402.091	1382.48	EW9303_300-425um_1-78_sp	EW9303_obj00059	81350	374.893	286.246	1129.51
IP.308595	EW9303-04	IPE.08231	64.71	-28.91	300-425	EW_3-4_006	Globigerina bulloides	EW9303_300-425um_1-78_umb	300-425_obj00002	130386	483.764	352.751	1506.7	EW9303_300-425um_1-78_sp	EW9303_obj00001	130381	469.993	358.084	1372.88
IP.308596	EW9303-04	IPE.08231	64.71	-28.91	300-425	EW_3-4_060	Unknown	EW9303_300-425um_1-78_umb	300-425_obj00074	111740	414.588	350.605	1261.44	EW9303_300-425um_1-78_sp	EW9303_obj00062	17006	238.95	94.2553	591.552
IP.308597	EW9303-04	IPE.08231	64.71	-28.91	300-425	EW_3-4_061	Globigerina bulloides	EW9303_300-425um_1-78_umb	300-425_obj00075	94480	378.497	323.724	1174.12	EW9303_300-425um_1-78_sp	EW9303_obj00063	172436	569.674	408.169	1656.88
IP.308598	EW9303-04	IPE.08231	64.71	-28.91	300-425	EW_3-4_062	Globigerina bulloides	EW9303_300-425um_1-78_umb	300-425_obj00077	122630	433.401	368.601	1339.68	EW9303_300-425um_1-78_sp	EW9303_obj00071	117301	430.718	355.593	1300.56
IP.308599	EW9303-04	IPE.08231	64.71	-28.91	300-425	EW_3-4_063	Globigerina bulloides	EW9303_300-425um_1-78_umb	300-425_obj00076	129493	448.465	378.601	3068.78	EW9303_300-425um_1-78_sp	EW9303_obj00067	94987	398.815	309.014	1168.57
IP.308600	EW9303-04	IPE.08231	64.71	-28.91	300-425	EW_3-4_064	Globigerina bulloides	EW9303_300-425um_1-78_umb	300-425_obj00084	106976	414.281	340.402	2684.22	EW9303_300-425um_1-78_sp	EW9303_obj00065	118053	433.903	355.779	1297.25
IP.308601	EW9303-04	IPE.08231	64.71	-28.91	300-425	EW_3-4_065	Globigerina bulloides	EW9303_300-425um_1-78_umb						EW9303_300-425um_1-78_sp	EW9303_obj00066	138138	460.296	389.847	1415.75
IP.308602	EW9303-04	IPE.08231	64.71	-28.91	300-425	EW_3-4_066	Globigerina bulloides	EW9303_300-425um_1-78_umb	300-425_obj00082	97058	386.856	328.369	1254	EW9303_300-425um_1-78_sp	EW9303_obj00064	128511	443.561	379.277	1350.77
IP.308603	EW9303-04	IPE.08231	64.71	-28.91	300-425	EW_3-4_067	Globigerina bulloides	EW9303_300-425um_1-78_umb	300-425_obj00081	91494	400.564	299.025	1167	EW9303_300-425um_1-78_sp	EW9303_obj00069	156640	477.458	428.779	1506.55
IP.308604	EW9303-04	IPE.08231	64.71	-28.91	300-425	EW_3-4_068	Globigerina bulloides	EW9303_300-425um_1-78_umb	300-425_obj00078	152877	471.083	424.508	1582.31	EW9303_300-425um_1-78_sp	EW9303_obj00068	107872	408.072	343.486	1251.23
IP.308605	EW9303-04	IPE.08231	64.71	-28.91	300-425	EW_3-4_069	Globigerina bulloides	EW9303_300-425um_1-78_umb						EW9303_300-425um_1-78_sp	EW9303_obj00070	104992	409.61	329.119	2423.53
IP.308606	EW9303-04	IPE.08231	64.71	-28.91	300-425	EW_3-4_007	Globigerina bulloides	EW9303_300-425um_1-78_umb	300-425_obj00001	105157	406.613	335.522	1307.33	EW9303_300-425um_1-78_sp	EW9303_obj00005	98569	406.133	314.032	1192.72
IP.308607	EW9303-04	IPE.08231	64.71	-28.91	300-425	EW_3-4_070	Globigerina bulloides	EW9303_300-425um_1-78_umb	300-425_obj00085	106765	404.082	343.87	2554.29	EW9303_300-425um_1-78_sp	EW9303_obj00073	120450	401.097	390.356	1287.93
IP.308608	EW9303-04	IPE.08231	64.71	-28.91	300-425	EW_3-4_071	Globigerina bulloides	EW9303_300-425um_1-78_umb						EW9303_300-425um_1-78_sp	EW9303_obj00072	149566	468.204	413.934	1451.28
IP.308609	EW9303-04	IPE.08231	64.71	-28.91	300-425	EW_3-4_072	Globigerina bulloides	EW9303_300-425um_1-78_umb	300-425_obj00087	74903	362.588	266.575	1045.01	EW9303_300-425um_1-78_sp	EW9303_obj00075	90393	402.195	297.919	1181.48
IP.308610	EW9303-04	IPE.08231	64.71	-28.91	300-425	EW_3-4_073	Globigerina bulloides	EW9303_300-425um_1-78_umb	300-425_obj00090	104095	389.756	353.951	2691.32	EW9303_300-425um_1-78_sp	EW9303_obj00079	107909	416.59	335.291	1235.75
IP.308611	EW9303-04	IPE.08231	64.71	-28.91	300-425	EW_3-4_074	Globigerina bulloides	EW9303_300-425um_1-78_umb	300-425_obj00092	109333	410.724	343.988	2582.22	EW9303_300-425um_1-78_sp	EW9303_obj00078	77213	376.916	262.985	1048.02
IP.308612	EW9303-04	IPE.08231	64.71	-28.91	300-425	EW_3-4_075	Globigerina bulloides	EW9303_300-425um_1-78_umb	300-425_obj00093	77628	364.963	278.461	1074.36	EW9303_300-425um_1-78_sp	EW9303_obj00074	110710	396.797	362.92	1267.56
IP.308613	EW9303-04	IPE.08231	64.71	-28.91	300-425	EW_3-4_076	Globigerina bulloides	EW9303_300-425um_1-78_umb	300-425_obj00091	94740	383.025	325.347	1197.82	EW9303_300-425um_1-78_sp	EW9303_obj00076	103394	399.918	341.704	1238.68
IP.308614	EW9303-04	IPE.08231	64.71	-28.91	300-425	EW_3-4_077	Globigerina bulloides	EW9303_300-425um_1-78_umb	300-425_obj00089	109237	417.043	345.301	1458.91	EW9303_300-425um_1-78_sp	EW9303_obj00077	105773	391.664	356.815	1244.8
IP.308615	EW9303-04	IPE.08231	64.71	-28.91	300-425	EW_3-4_078	Globigerina bulloides	EW9303_300-425um_1-78_umb						EW9303_300-425um_1-78_sp	EW9303_obj00080	128436	435.968	378.1	1332.48
IP.308617	EW9303-04	IPE.08231	64.71	-28.91	300-425	EW_3-4_008	Globigerina bulloides	EW9303_300-425um_1-78_umb	300-425_obj00004					EW9303_300-425um_1-78_sp	EW9303_obj00002	209317	596.268	458.521	1749.95
IP.308618	EW9303-04	IPE.08231	64.71	-28.91	300-425	EW_3-4_009	Globigerina bulloides	EW9303_300-425um_1-78_umb	300-425_obj00003	109743	414.457	342.397	1238.13	EW9303_300-425um_1-78_sp	EW9303_obj00004	99700	402.693	320.313	1255.59
IP.308619	KC78	IPE.08316	5.267	-44.133	250-300	KC_2-3_001	Globigerinoides ruber	KC78_250-300um_1-44_umb	KC78_obj00046	80424	356.877	290.979	1061.7	KC78_250-300um_1-44_sp	KC78_obj00046	81905	357.591	296.607	1089.38
IP.308620	KC78	IPE.08316	5.267	-44.133	250-300	KC_2-3_010	Globigerinoides ruber	KC78_250-300um_1-44_umb	KC78_obj00036	77810	356.49	282.199	1098.25	KC78_250-300um_1-44_sp	KC78_obj00036	79245	358.715	285.634	1116
IP.308621	KC78	IPE.08316	5.267	-44.133	250-300	KC_2-3_011	Globigerinoides sacculifer	KC78_250-300um_1-44_umb	KC78_obj00027	82717	359.072	306.31	1114.21	KC78_250-300um_1-44_sp	KC78_obj00027	85341	371.419	305.423	2262.7
IP.308622	KC78	IPE.08316	5.267	-44.133	250-300	KC_2-3_012	Globigerinella siphonifera	KC78_250-300um_1-44_umb	KC78_obj00020	54212	340.886	218.125	1108.65	KC78_250-300um_1-44_sp	KC78_obj00020	57752	342.333	230.984	2165.28
IP.308623	KC78	IPE.08316	5.267	-44.133	250-300	KC_2-3_013	Globigerinoides ruber	KC78_250-300um_1-44_umb						KC78_250-300um_1-44_sp	KC78_obj00013	70119	354.834	260.554	2446.66
IP.308624	KC78	IPE.08316	5.267	-44.133	250-300	KC_2-3_014	Globigerinoides sacculifer	KC78_250-300um_1-44_umb	KC78_obj00006	69597	344.04	262.887	1032.86	KC78_250-300um_1-44_sp	KC78_obj00006	71627	345.21	268.027	2043.08
IP.308625	KC78	IPE.08316	5.267	-44.133	250-300	KC_2-3_015	Globigerinoides ruber	KC78_250-300um_1-44_umb	KC78_obj00001	83132	386.236	282.707	1195.89	KC78_250-300um_1-44_sp	KC78_obj00001	85195	388.712	288.206	1195.83
IP.308626	KC78	IPE.08316	5.267	-44.133	250-300	KC_2-3_016	Globigerinoides ruber	KC78_250-300um_1-44_umb	KC78_obj00048	97633	401.149	316.014	1311.78	KC78_250-300um_1-44_sp	KC78_obj00048	101132	402.458	325.15	2583.17
IP.308627	KC78	IPE.08316	5.267	-44.133	250-300	KC_2-3_017	Globigerinoides ruber	KC78_250-300um_1-44_umb	KC78_obj00040	72565	336.797	280.817	1037.74	KC78_250-300um_1-44_sp	KC78_obj00040	74130	338.621	285.759	1075.25
IP.308628	KC78	IPE.08316	5.267	-44.133	250-300	KC_2-3_018	Globigerinoides ruber	KC78_250-300um_1-44_umb	KC78_obj00035	83341	370.137	293.74	1119.03	KC78_250-300um_1-44_sp	KC78_obj00035	88455	373.728	306.873	1200.25
IP.308629	KC78	IPE.08316	5.267	-44.133	250-300	KC_2-3_019	Globigerinoides ruber	KC78_250-300um_1-44_umb	KC78_obj00033	76013	332.846	302.063	1166.83	KC78_250-300um_1-44_sp	KC78_obj00033	80365	342.031	309.826	2363.81
IP.308630	KC78	IPE.08316	5.267	-44.133	250-300	KC_2-3_002	Globorotalia tumida	KC78_250-300um_1-44_umb	KC78_obj00044	151863	507.986	384.432	1454.17	KC78_250-300um_1-44_sp	KC78_obj00044	152781	508.182	386.24	1457.18
IP.308632	KC78	IPE.08316	5.267	-44.133	250-300	KC_2-3_021	Globigerinoides sacculifer	KC78_250-300um_1-44_umb	KC78_obj00021	79028	370.383	277.699	1083.55	KC78_250-300um_1-44_sp	KC78_obj00021	80383	374.499	279.352	1088.58
IP.308633	KC78	IPE.08316	5.267	-44.133	250-300	KC_2-3_022	Globigerinoides sacculifer	KC78_250-300um_1-44_umb	KC78_obj00016	88126	404.853	281.144	1127.25	KC78_250-300um_1-44_sp	KC78_obj00016	90654	413.598	283.641	1194.58
IP.308635	KC78	IPE.08316	5.267	-44.133	250-300	KC_2-3_024	Globigerinoides sacculifer	KC78_250-300um_1-44_umb	KC78_obj00002	80330	342.832	315.14	2490.23	KC78_250-300um_1-44_sp	KC78_obj00002	82599	350.584	315.63	1273.59
IP.308636	KC78	IPE.08316	5.267	-44.133	250-300	KC_2-3_025	Globigerinoides sacculifer	KC78_250-300um_1-44_umb	KC78_obj00047	99450	408.3	319.544	1228.73	KC78_250-300um_1-44_sp	KC78_obj00047	102793	411.451	326.335	2621.87
IP.308637	KC78	IPE.08316	5.267	-44.133	250-300	KC_2-3_026	Globigerinoides sacculifer	KC78_250-300um_1-44_umb	KC78_obj00042	98004	404.077	314.667	1319.96	KC78_250-300um_1-44_sp	KC78_obj00042	104317	417.984	322.668	1382.4
IP.308638	KC78	IPE.08316	5.267	-44.133	250-300	KC_2-3_027	Globigerinoides ruber	KC78_250-300um_1-44_umb	KC78_obj00038	79336	361.565	290.445	1157.15	KC78_250-300um_1-44_sp	KC78_obj00038	84153	365.97	302.558	2477.18
IP.308639	KC78	IPE.08316	5.267	-44.133	250-300	KC_2-3_028	Globigerinoides sacculifer	KC78_250-300um_1-44_umb						KC78_250-300um_1-44_sp	KC78_obj00028	82481	350.44	312.932	1192.12
IP.308640	KC78	IPE.08316	5.267	-44.133	250-300	KC_2-3_029	Globigerinoides ruber	KC78_250-300um_1-44_umb	KC78_obj00023	72347	334.561	283.89	1138.96	KC78_250-300um_1-44_sp	KC78_obj00023	75295	339.289	290.816	1119.67
IP.308641	KC78	IPE.08316	5.267	-44.133	250-300	KC_2-3_003	Globigerinoides sacculifer	KC78_250-300um_1-44_umb	KC78_obj00037	96302	414.288	300.559	1167.84	KC78_250-300um_1-44_sp	KC78_obj00037	97077	415.52	302.02	1172.53
IP.308642	KC78	IPE.08316	5.267	-44.133	250-300	KC_2-3_030	Globigerinoides ruber	KC78_250-300um_1-44_umb	KC78_obj00018	72109	341.622	274.03	1045.77	KC78_250-300um_1-44_sp	KC78_obj00018	75922	355.069	279.125	1126.2
IP.308643	KC78	IPE.08316	5.267	-44.133	250-300	KC_2-3_031	Globigerinoides sacculifer	KC78_250-300um_1-44_umb	KC78_obj00015	70997	358.692	257.031	2504.54	KC78_250-300um_1-44_sp	KC78_obj00015	76328	362.048	273.468	2354.14
IP.308644	KC78	IPE.08316	5.267	-44.133	250-300	KC_2-3_032	Globigerinoides sacculifer	KC78_250-300um_1-44_umb	KC78_obj00009	70579	336.187	287.901	1283.21	KC78_250-300um_1-44_sp	KC78_obj00009	76624	350.83	291.936	2425.83
IP.308645	KC78	IPE.08316	5.267	-44.133	250-300	KC_2-3_033	Globigerinoides sacculifer	KC78_250-300um_1-44_umb	KC78_obj00004	92705	396.632	303.4	1191.63	KC78_250-300um_1-44_sp	KC78_obj00004	93726	398.536	305.079	1185.74
IP.308646	KC78	IPE.08316	5.267	-44.133	250-300	KC_2-3_034	Globigerinoides sacculifer	KC78_250-300um_1-44_umb	KC78_obj00049	89661	386.545	298.987	1173.27	KC78_250-300um_1-44_sp	KC78_obj00049	92044	386.835	306.976	2495.26
IP.308647	KC78	IPE.08316	5.267	-44.133	250-300	KC_2-3_035	Globigerinoides sacculifer	KC78_250-300um_1-44_umb	KC78_obj00039	73310	334.28	290.198	1110.23	KC78_250-300um_1-44_sp	KC78_obj00039	77709	340.031	300.159	2275.75
IP.308648	KC78	IPE.08316	5.267	-44.133	250-300	KC_2-3_036	Globigerinella siphonifera	KC78_250-300um_1-44_umb	KC78_obj00032	119283	478.378	328.491	1424.72	KC78_250-300um_1-44_sp	KC78_obj00032	122684	487.244	332.215	1437.54
IP.308649	KC78	IPE.08316	5.267	-44.133	250-300	KC_2-3_037	Globigerinoides sacculifer	KC78_250-300um_1-44_umb						KC78_250-300um_1-44_sp	KC78_obj00029	102733	423.099	315.291	1359.32
IP.308650	KC78	IPE.08316	5.267	-44.133	250-300	KC_2-3_038	Globigerinoides ruber	KC78_250-300um_1-44_umb	KC78_obj00022	85330	391.647	290.133	1166.82	KC78_250-300um_1-44_sp	KC78_obj00022	88204	391.712	300.516	1226.7
IP.308651	KC78	IPE.08316	5.267	-44.133	250-300	KC_2-3_039	Unknown	KC78_250-300um_1-44_umb	KC78_obj00019	61868	328.786	240.37	911.238	KC78_250-300um_1-44_sp
IP.308652	KC78	IPE.08316	5.267	-44.133	250-300	KC_2-3_004	Globigerinoides ruber	KC78_250-300um_1-44_umb	KC78_obj00031	70947	312.98	297.811	1072.04	KC78_250-300um_1-44_sp	KC78_obj00031	74335	319.557	304.192	1110.39
IP.308653	KC78	IPE.08316	5.267	-44.133	250-300	KC_2-3_040	Unknown	KC78_250-300um_1-44_umb	KC78_obj00012	83162	354.188	304.769	1178.07	KC78_250-300um_1-44_sp	KC78_obj00012	86610	366.043	308.009	2475.19
IP.308654	KC78	IPE.08316	5.267	-44.133	250-300	KC_2-3_041	Unknown	KC78_250-300um_1-44_umb	KC78_obj00010	92831	403.383	304.136	1168.32	KC78_250-300um_1-44_sp	KC78_obj00010	95584	405.058	313.178	1259.91
IP.308655	KC78	IPE.08316	5.267	-44.133	250-300	KC_2-3_042	Globigerinoides ruber	KC78_250-300um_1-44_umb	KC78_obj00005	72407	335.412	279.039	1014.98	KC78_250-300um_1-44_sp	KC78_obj00005	73800	339.764	280.592	2077.65
IP.308656	KC78	IPE.08316	5.267	-44.133	250-300	KC_2-3_043	Unknown	KC78_250-300um_1-44_umb						KC78_250-300um_1-44_sp	IP.000000_obj00044	77203	336.87	304.77	1362.4
IP.308657	KC78	IPE.08316	5.267	-44.133	250-300	KC_2-3_044	Globigerinoides ruber	KC78_250-300um_1-44_umb						KC78_250-300um_1-44_sp	IP.000000_obj00041	55198	297.668	242.648	977.482
IP.308658	KC78	IPE.08316	5.267	-44.133	250-300	KC_2-3_045	Globigerinoides ruber	KC78_250-300um_1-44_umb						KC78_250-300um_1-44_sp	IP.000000_obj00035	63928	317.584	261.19	993.898
IP.308659	KC78	IPE.08316	5.267	-44.133	250-300	KC_2-3_046	Globigerinoides sacculifer	KC78_250-300um_1-44_umb						KC78_250-300um_1-44_sp	IP.000000_obj00029	115846	442.45	342.12	1445.24
IP.308660	KC78	IPE.08316	5.267	-44.133	250-300	KC_2-3_047	Globigerinoides sacculifer	KC78_250-300um_1-44_umb						KC78_250-300um_1-44_sp	IP.000000_obj00024	90158	388.599	302.403	1191
IP.308661	KC78	IPE.08316	5.267	-44.133	250-300	KC_2-3_048	Globigerinoides sacculifer	KC78_250-300um_1-44_umb						KC78_250-300um_1-44_sp	IP.000000_obj00020	86080	383.915	295.714	1176.36
IP.308664	KC78	IPE.08316	5.267	-44.133	250-300	KC_2-3_050	Globigerinoides ruber	KC78_250-300um_1-44_umb						KC78_250-300um_1-44_sp	IP.000000_obj00009	92618	380.064	319.383	2481.56
IP.308665	KC78	IPE.08316	5.267	-44.133	250-300	KC_2-3_051	Globigerinoides ruber	KC78_250-300um_45-93_umb						KC78_250-300um_45-93_sp	IP.000000_obj00005	71188	348.305	268.702	1049.62
IP.308666	KC78	IPE.08316	5.267	-44.133	250-300	KC_2-3_052	Globigerinoides ruber	KC78_250-300um_45-93_umb						KC78_250-300um_45-93_sp	IP.000000_obj00001	77020	348.259	286.489	1063
IP.308667	KC78	IPE.08316	5.267	-44.133	250-300	KC_2-3_053	Globorotalia menardii	KC78_250-300um_45-93_umb						KC78_250-300um_45-93_sp	IP.000000_obj00045	119541	434.977	353.133	2732.42
IP.308668	KC78	IPE.08316	5.267	-44.133	250-300	KC_2-3_054	Globigerinoides sacculifer	KC78_250-300um_45-93_umb						KC78_250-300um_45-93_sp	IP.000000_obj00040	93747	399.828	307.508	1221
IP.308669	KC78	IPE.08316	5.267	-44.133	250-300	KC_2-3_055	Globigerinoides sacculifer	KC78_250-300um_45-93_umb						KC78_250-300um_45-93_sp	IP.000000_obj00036	81684	386.354	281.007	1138.73
IP.308670	KC78	IPE.08316	5.267	-44.133	250-300	KC_2-3_056	Globigerinoides sacculifer	KC78_250-300um_45-93_umb						KC78_250-300um_45-93_sp	IP.000000_obj00031	84916	372.836	299.831	1153.62
IP.308671	KC78	IPE.08316	5.267	-44.133	250-300	KC_2-3_057	Globigerinoides ruber	KC78_250-300um_45-93_umb						KC78_250-300um_45-93_sp	IP.000000_obj00028	66688	328.983	262.214	1000.16
IP.308673	KC78	IPE.08316	5.267	-44.133	250-300	KC_2-3_059	Globigerinoides sacculifer	KC78_250-300um_45-93_umb						KC78_250-300um_45-93_sp	IP.000000_obj00016	75058	326.647	295.884	1000.68
IP.308674	KC78	IPE.08316	5.267	-44.133	250-300	KC_2-3_006	Globigerinoides sacculifer	KC78_250-300um_1-44_umb	KC78_obj00017	95887	382.753	331.444	1239.19	KC78_250-300um_1-44_sp
IP.308675	KC78	IPE.08316	5.267	-44.133	250-300	KC_2-3_060	Unknown	KC78_250-300um_45-93_umb						KC78_250-300um_45-93_sp	IP.000000_obj00010	40968	278.83	193.128	898.444
IP.308676	KC78	IPE.08316	5.267	-44.133	250-300	KC_2-3_061	Globigerinoides sacculifer	KC78_250-300um_45-93_umb						KC78_250-300um_45-93_sp	IP.000000_obj00006	88148	399.577	286.328	1126.39
IP.308677	KC78	IPE.08316	5.267	-44.133	250-300	KC_2-3_062	Globigerinoides sacculifer	KC78_250-300um_45-93_umb						KC78_250-300um_45-93_sp	IP.000000_obj00002	91715	403.77	294.68	2600.43
IP.308679	KC78	IPE.08316	5.267	-44.133	250-300	KC_2-3_064	Globigerinoides sacculifer	KC78_250-300um_45-93_umb						KC78_250-300um_45-93_sp	IP.000000_obj00039	93587	397.697	302.495	1262.58
IP.308681	KC78	IPE.08316	5.267	-44.133	250-300	KC_2-3_066	Globigerinoides ruber	KC78_250-300um_45-93_umb						KC78_250-300um_45-93_sp	IP.000000_obj00030	85807	377.302	295.424	2512.94
IP.308682	KC78	IPE.08316	5.267	-44.133	250-300	KC_2-3_067	Globigerinella siphonifera	KC78_250-300um_45-93_umb						KC78_250-300um_45-93_sp	IP.000000_obj00025	67569	305.716	285.613	1124.27
IP.308684	KC78	IPE.08316	5.267	-44.133	250-300	KC_2-3_069	Globigerinoides sacculifer	KC78_250-300um_45-93_umb						KC78_250-300um_45-93_sp	IP.000000_obj00014	124389	474.761	337.868	2751.45
IP.308685	KC78	IPE.08316	5.267	-44.133	250-300	KC_2-3_007	Globigerinoides sacculifer	KC78_250-300um_1-44_umb	KC78_obj00011	77326	365.539	277.99	1060.38	KC78_250-300um_1-44_sp
IP.308686	KC78	IPE.08316	5.267	-44.133	250-300	KC_2-3_070	Globigerinoides ruber	KC78_250-300um_45-93_umb						KC78_250-300um_45-93_sp	IP.000000_obj00011	98497	425.487	299.439	2399.87
IP.308687	KC78	IPE.08316	5.267	-44.133	250-300	KC_2-3_071	Orbulina universa	KC78_250-300um_45-93_umb						KC78_250-300um_45-93_sp	IP.000000_obj00008	73264	345.573	273.198	1016.92
IP.308688	KC78	IPE.08316	5.267	-44.133	250-300	KC_2-3_072	Globigerinoides ruber	KC78_250-300um_45-93_umb						KC78_250-300um_45-93_sp	IP.000000_obj00003	51785	258.163	255.786	847.152
IP.308689	KC78	IPE.08316	5.267	-44.133	250-300	KC_2-3_073	Unknown	KC78_250-300um_45-93_umb						KC78_250-300um_45-93_sp	IP.000000_obj00048	67542	343.804	254.026	2156.19
IP.308690	KC78	IPE.08316	5.267	-44.133	250-300	KC_2-3_074	Globigerinoides sacculifer	KC78_250-300um_45-93_umb						KC78_250-300um_45-93_sp	IP.000000_obj00042	83988	373.006	290.66	1104.84
IP.308691	KC78	IPE.08316	5.267	-44.133	250-300	KC_2-3_075	Globigerinoides sacculifer	KC78_250-300um_45-93_umb						KC78_250-300um_45-93_sp	IP.000000_obj00038	74138	360.665	266.217	1201.8
IP.308693	KC78	IPE.08316	5.267	-44.133	250-300	KC_2-3_077	Globigerinoides sacculifer	KC78_250-300um_45-93_umb						KC78_250-300um_45-93_sp	IP.000000_obj00026	63796	330.238	253.644	1092.41
IP.308694	KC78	IPE.08316	5.267	-44.133	250-300	KC_2-3_078	Globigerinoides sacculifer	KC78_250-300um_45-93_umb						KC78_250-300um_45-93_sp	IP.000000_obj00019	113167	444.306	328.692	1392.88
IP.308695	KC78	IPE.08316	5.267	-44.133	250-300	KC_2-3_079	Globigerinoides ruber	KC78_250-300um_45-93						KC78_250-300um_45-93_sp	IP.000000_obj00017	96545	403.532	310.759	1296.92
IP.308696	KC78	IPE.08316	5.267	-44.133	250-300	KC_2-3_008	Globigerinoides sacculifer	KC78_250-300um_1-44_umb	KC78_obj00003	63229	337.616	244.228	2165.7	KC78_250-300um_1-44_sp	KC78_obj00003	66494	344.755	249.855	1032.19
IP.308697	KC78	IPE.08316	5.267	-44.133	250-300	KC_2-3_080	Globigerinoides ruber	KC78_250-300um_45-93						KC78_250-300um_45-93_sp	IP.000000_obj00012	90138	365.205	322.661	1136.7
IP.308698	KC78	IPE.08316	5.267	-44.133	250-300	KC_2-3_081	Globigerinoides ruber	KC78_250-300um_45-93						KC78_250-300um_45-93_sp	IP.000000_obj00007	74855	348.732	281.168	1069.98
IP.308699	KC78	IPE.08316	5.267	-44.133	250-300	KC_2-3_082	Unknown	KC78_250-300um_45-93						KC78_250-300um_45-93_sp	IP.000000_obj00004	71086	333.875	279.535	1021.41
IP.308700	KC78	IPE.08316	5.267	-44.133	250-300	KC_2-3_083	Globigerinoides sacculifer	KC78_250-300um_45-93						KC78_250-300um_45-93_sp	IP.000000_obj00047	64878	319.893	264.911	995.948
IP.308701	KC78	IPE.08316	5.267	-44.133	250-300	KC_2-3_084	Globigerinoides ruber	KC78_250-300um_45-93						KC78_250-300um_45-93_sp	IP.000000_obj00043	67180	327.223	263.812	2041.2
IP.308702	KC78	IPE.08316	5.267	-44.133	250-300	KC_2-3_085	Globigerinoides sacculifer	KC78_250-300um_45-93						KC78_250-300um_45-93_sp	IP.000000_obj00037	81760	355.263	298.477	1160.17
IP.308704	KC78	IPE.08316	5.267	-44.133	250-300	KC_2-3_087	Globigerinoides sacculifer	KC78_250-300um_45-93						KC78_250-300um_45-93_sp	IP.000000_obj00027	86305	382.786	290.669	1165.61
IP.308705	KC78	IPE.08316	5.267	-44.133	250-300	KC_2-3_088	Globigerinoides ruber	KC78_250-300um_45-93						KC78_250-300um_45-93_sp	IP.000000_obj00023	68342	329.786	266.44	965.986
IP.308706	KC78	IPE.08316	5.267	-44.133	250-300	KC_2-3_089	Globigerinoides sacculifer	KC78_250-300um_45-93						KC78_250-300um_45-93_sp	IP.000000_obj00018	71305	344.66	267.883	1020.98
IP.308707	KC78	IPE.08316	5.267	-44.133	250-300	KC_2-3_009	Globigerinoides sacculifer	KC78_250-300um_1-44_umb	KC78_obj00045	70893	352.605	260.443	1061.16	KC78_250-300um_1-44_sp	KC78_obj00045	72958	353.493	266.746	1048.23
IP.308708	KC78	IPE.08316	5.267	-44.133	300-425	KC_3-4_001	Globigerinoides sacculifer	KC78_300-425_1-144						KC78_300-425_1-144_sp	IP.000000_obj00010	108917	432.028	329.879	2522.94
IP.308709	KC78	IPE.08316	5.267	-44.133	300-425	KC_3-4_010	Globigerinoides ruber	KC78_300-425_1-144						KC78_300-425_1-144_sp	IP.000000_obj00005	151678	496.64	399.186	1483.82
IP.308711	KC78	IPE.08316	5.267	-44.133	300-425	KC_3-4_101	Globigerinoides sacculifer	KC78_300-425_1-144	converted_obj00055	154851	512.742	392.741	1844.66	KC78_300-425_1-144_sp
IP.308712	KC78	IPE.08316	5.267	-44.133	300-425	KC_3-4_102	Globigerinoides sacculifer	KC78_300-425_1-144	converted_obj00051	141480	530.533	364.632	4459.37	KC78_300-425_1-144_sp
IP.308714	KC78	IPE.08316	5.267	-44.133	300-425	KC_3-4_104	Globigerinoides ruber	KC78_300-425_1-144	converted_obj00041	141004	467.837	396.66	1459.45	KC78_300-425_1-144_sp
IP.308715	KC78	IPE.08316	5.267	-44.133	300-425	KC_3-4_105	Globigerinoides sacculifer	KC78_300-425_1-144	converted_obj00034	178218	511.696	455.815	1641.07	KC78_300-425_1-144_sp
IP.308717	KC78	IPE.08316	5.267	-44.133	300-425	KC_3-4_107	Globigerinoides sacculifer	KC78_300-425_1-144	converted_obj00026	196471	596.387	422.335	1649.33	KC78_300-425_1-144_sp
IP.308718	KC78	IPE.08316	5.267	-44.133	300-425	KC_3-4_108	Globigerinoides sacculifer	KC78_300-425_1-144	converted_obj00018	195976	587.581	434.906	1691.91	KC78_300-425_1-144_sp
IP.308719	KC78	IPE.08316	5.267	-44.133	300-425	KC_3-4_109	Globigerinoides ruber	KC78_300-425_1-144	converted_obj00012	129655	462.491	362.016	1424.72	KC78_300-425_1-144_sp
IP.308721	KC78	IPE.08316	5.267	-44.133	300-425	KC_3-4_110	Globigerinoides ruber	KC78_300-425_1-144	converted_obj00005	123877	448.987	360.533	1360	KC78_300-425_1-144_sp
IP.308723	KC78	IPE.08316	5.267	-44.133	300-425	KC_3-4_112	Globorotalia tumida	KC78_300-425_1-144	converted_obj00048	244521	631.729	504.615	2473.94	KC78_300-425_1-144_sp
IP.308725	KC78	IPE.08316	5.267	-44.133	300-425	KC_3-4_114	Globigerinoides sacculifer	KC78_300-425_1-144	converted_obj00040	130266	481.58	349.466	1363.79	KC78_300-425_1-144_sp
IP.308727	KC78	IPE.08316	5.267	-44.133	300-425	KC_3-4_116	Globigerinoides sacculifer	KC78_300-425_1-144	converted_obj00033	134679	494.608	351.48	1446.76	KC78_300-425_1-144_sp
IP.308728	KC78	IPE.08316	5.267	-44.133	300-425	KC_3-4_117	Globigerinoides ruber	KC78_300-425_1-144	converted_obj00029	129344	488.821	346.397	1406.24	KC78_300-425_1-144_sp
IP.308729	KC78	IPE.08316	5.267	-44.133	300-425	KC_3-4_118	Globigerinoides ruber	KC78_300-425_1-144	converted_obj00020	100954	367.173	359.3	2501.6	KC78_300-425_1-144_sp
IP.308730	KC78	IPE.08316	5.267	-44.133	300-425	KC_3-4_119	Globigerinoides sacculifer	KC78_300-425_1-144	converted_obj00011	145427	484.777	390.656	1479.49	KC78_300-425_1-144_sp
IP.308734	KC78	IPE.08316	5.267	-44.133	300-425	KC_3-4_121	Globigerinoides ruber	KC78_300-425_1-144	converted_obj00053	80355	365.671	287.125	1130.05	KC78_300-425_1-144_sp
IP.308735	KC78	IPE.08316	5.267	-44.133	300-425	KC_3-4_122	Globigerinoides ruber	KC78_300-425_1-144	converted_obj00047	98488	375.526	349.547	2718.37	KC78_300-425_1-144_sp
IP.308736	KC78	IPE.08316	5.267	-44.133	300-425	KC_3-4_123	Globigerinoides sacculifer	KC78_300-425_1-144	converted_obj00043	105616	427.531	319.003	1226.98	KC78_300-425_1-144_sp
IP.308737	KC78	IPE.08316	5.267	-44.133	300-425	KC_3-4_124	Globigerinoides sacculifer	KC78_300-425_1-144	converted_obj00038	132544	475.056	368.188	1398.48	KC78_300-425_1-144_sp
IP.308738	KC78	IPE.08316	5.267	-44.133	300-425	KC_3-4_125	Globigerinoides sacculifer	KC78_300-425_1-144	converted_obj00035	133696	479.89	359.351	1405.75	KC78_300-425_1-144_sp
IP.308739	KC78	IPE.08316	5.267	-44.133	300-425	KC_3-4_126	Unknown	KC78_300-425_1-144	converted_obj00031	88922	352.054	329.018	1108.56	KC78_300-425_1-144_sp
IP.308740	KC78	IPE.08316	5.267	-44.133	300-425	KC_3-4_127	Globigerinella siphonifera	KC78_300-425_1-144	converted_obj00027	128614	478.1	357.576	2948.99	KC78_300-425_1-144_sp
IP.308741	KC78	IPE.08316	5.267	-44.133	300-425	KC_3-4_128	Globigerinoides sacculifer	KC78_300-425_1-144	converted_obj00021	104853	393.364	343.275	2486.06	KC78_300-425_1-144_sp
IP.308742	KC78	IPE.08316	5.267	-44.133	300-425	KC_3-4_129	Globigerinoides sacculifer	KC78_300-425_1-144	converted_obj00009	157493	525.881	389.52	1511.78	KC78_300-425_1-144_sp
IP.308743	KC78	IPE.08316	5.267	-44.133	300-425	KC_3-4_013	Globorotalia menardii	KC78_300-425_1-144						KC78_300-425_1-144_sp	IP.000000_obj00022	207826	623.027	432.75	1760.14
IP.308744	KC78	IPE.08316	5.267	-44.133	300-425	KC_3-4_130	Globigerinella siphonifera	KC78_300-425_1-144	converted_obj00003	134426	490.914	359.283	1446.64	KC78_300-425_1-144_sp
IP.308746	KC78	IPE.08316	5.267	-44.133	300-425	KC_3-4_132	Globorotalia menardii	KC78_300-425_1-144	converted_obj00049	178653	533.043	431.304	3155.53	KC78_300-425_1-144_sp
IP.308747	KC78	IPE.08316	5.267	-44.133	300-425	KC_3-4_133	Neogloboquadrina dutertrei	KC78_300-425_1-144	converted_obj00045	136350	436.621	401.648	1381.24	KC78_300-425_1-144_sp
IP.308748	KC78	IPE.08316	5.267	-44.133	300-425	KC_3-4_134	Unknown	KC78_300-425_1-144	converted_obj00039	212586	540.378	507.49	1701.02	KC78_300-425_1-144_sp
IP.308749	KC78	IPE.08316	5.267	-44.133	300-425	KC_3-4_135	Globigerinoides ruber	KC78_300-425_1-144	converted_obj00032	122520	438.93	371.372	1406.43	KC78_300-425_1-144_sp
IP.308750	KC78	IPE.08316	5.267	-44.133	300-425	KC_3-4_136	Pulleniatina obliquiloculata	KC78_300-425_1-144	converted_obj00030	118935	407.597	373.143	1270.57	KC78_300-425_1-144_sp
IP.308751	KC78	IPE.08316	5.267	-44.133	300-425	KC_3-4_137	Globigerinoides sacculifer	KC78_300-425_1-144	converted_obj00023	172917	589.969	383.946	3317.33	KC78_300-425_1-144_sp
IP.308753	KC78	IPE.08316	5.267	-44.133	300-425	KC_3-4_139	Globigerinoides ruber	KC78_300-425_1-144	converted_obj00010	111200	407.634	357.336	1289.42	KC78_300-425_1-144_sp
IP.308754	KC78	IPE.08316	5.267	-44.133	300-425	KC_3-4_014	Unknown	KC78_300-425_1-144						KC78_300-425_1-144_sp	IP.000000_obj00021	233042	635.311	474.581	1831.83
IP.308757	KC78	IPE.08316	5.267	-44.133	300-425	KC_3-4_141	Globigerinoides ruber	KC78_300-425_1-144	converted_obj00024	95938	402.761	310.111	1177.42	KC78_300-425_1-144_sp
IP.308758	KC78	IPE.08316	5.267	-44.133	300-425	KC_3-4_142	Globigerinoides ruber	KC78_300-425_1-144	converted_obj00016	105683	421.976	329.255	1296.45	KC78_300-425_1-144_sp
IP.308759	KC78	IPE.08316	5.267	-44.133	300-425	KC_3-4_143	Globigerinoides ruber	KC78_300-425_1-144	converted_obj00013	115273	452.704	348.201	1645.81	KC78_300-425_1-144_sp
IP.308760	KC78	IPE.08316	5.267	-44.133	300-425	KC_3-4_144	Globigerinoides sacculifer	KC78_300-425_1-144	converted_obj00001	179089	574.705	410.738	1738.02	KC78_300-425_1-144_sp
IP.308761	KC78	IPE.08316	5.267	-44.133	300-425	KC_3-4_015	Globorotalia menardii	KC78_300-425_1-144						KC78_300-425_1-144_sp	IP.000000_obj00025	190253	507.365	478.963	1629.13
IP.308764	KC78	IPE.08316	5.267	-44.133	300-425	KC_3-4_017	Globigerinoides sacculifer	KC78_300-425_1-144						KC78_300-425_1-144_sp	IP.000000_obj00018	228940	642.688	466.502	1968.92
IP.308766	KC78	IPE.08316	5.267	-44.133	300-425	KC_3-4_018	Globigerinoides sacculifer	KC78_300-425_1-144						KC78_300-425_1-144_sp	IP.000000_obj00019	135383	454.577	384.656	1402.21
IP.308767	KC78	IPE.08316	5.267	-44.133	300-425	KC_3-4_019	Globigerinoides ruber	KC78_300-425_1-144						KC78_300-425_1-144_sp	IP.000000_obj00020	215567	564.283	490.238	1722.6
IP.308769	KC78	IPE.08316	5.267	-44.133	300-425	KC_3-4_002	Globigerinoides sacculifer	KC78_300-425_1-144						KC78_300-425_1-144_sp	IP.000000_obj00009	153220	525.839	381.395	1529.82
IP.308772	KC78	IPE.08316	5.267	-44.133	300-425	KC_3-4_022	Neogloboquadrina dutertrei	KC78_300-425_1-144						KC78_300-425_1-144_sp	IP.000000_obj00033	141446	499.003	368.15	1423.1
IP.308775	KC78	IPE.08316	5.267	-44.133	300-425	KC_3-4_024	Globigerinoides sacculifer	KC78_300-425_1-144						KC78_300-425_1-144_sp	IP.000000_obj00030	167835	502.864	440.592	1559.38
IP.308776	KC78	IPE.08316	5.267	-44.133	300-425	KC_3-4_025	Globigerinoides ruber	KC78_300-425_1-144						KC78_300-425_1-144_sp	IP.000000_obj00036	163867	476.235	442.487	1529.98
IP.308777	KC78	IPE.08316	5.267	-44.133	300-425	KC_3-4_026	Globigerinoides sacculifer	KC78_300-425_1-144						KC78_300-425_1-144_sp	IP.000000_obj00027	248733	696.887	463.683	1916.38
IP.308778	KC78	IPE.08316	5.267	-44.133	300-425	KC_3-4_027	Globigerinoides sacculifer	KC78_300-425_1-144						KC78_300-425_1-144_sp	IP.000000_obj00035	131019	472.654	362.554	1400.17
IP.308780	KC78	IPE.08316	5.267	-44.133	300-425	KC_3-4_028	Globigerinoides sacculifer	KC78_300-425_1-144						KC78_300-425_1-144_sp	IP.000000_obj00029	162837	470.046	455.387	1582.61
IP.308781	KC78	IPE.08316	5.267	-44.133	300-425	KC_3-4_029	Globorotalia menardii	KC78_300-425_1-144						KC78_300-425_1-144_sp	IP.000000_obj00028	138611	455.982	397.87	2968.25
IP.308783	KC78	IPE.08316	5.267	-44.133	300-425	KC_3-4_030	Globigerinoides sacculifer	KC78_300-425_1-144						KC78_300-425_1-144_sp	IP.000000_obj00034	231985	635.458	474.493	1829.39
IP.308785	KC78	IPE.08316	5.267	-44.133	300-425	KC_3-4_031	Globigerinoides ruber	KC78_300-425_1-144						KC78_300-425_1-144_sp	IP.000000_obj00056	145551	516.678	370.96	1483.25
IP.308787	KC78	IPE.08316	5.267	-44.133	300-425	KC_3-4_033	Globigerinoides sacculifer	KC78_300-425_1-144						KC78_300-425_1-144_sp	IP.000000_obj00044	115826	437.522	343.729	1292.4
IP.308790	KC78	IPE.08316	5.267	-44.133	300-425	KC_3-4_035	Globigerinoides sacculifer	KC78_300-425_1-144						KC78_300-425_1-144_sp	IP.000000_obj00048	132118	476.157	359.797	1453.51
IP.308791	KC78	IPE.08316	5.267	-44.133	300-425	KC_3-4_036	Globigerinoides sacculifer	KC78_300-425_1-144						KC78_300-425_1-144_sp	IP.000000_obj00042	201101	593.456	446.52	1741.01
IP.308792	KC78	IPE.08316	5.267	-44.133	300-425	KC_3-4_037	Globigerinella siphonifera	KC78_300-425_1-144						KC78_300-425_1-144_sp	IP.000000_obj00043	228077	649.712	467.39	1906.57
IP.308793	KC78	IPE.08316	5.267	-44.133	300-425	KC_3-4_038	Globigerinoides ruber	KC78_300-425_1-144						KC78_300-425_1-144_sp	IP.000000_obj00046	151036	482.783	412.676	1628.5
IP.308795	KC78	IPE.08316	5.267	-44.133	300-425	KC_3-4_039	Globorotalia menardii	KC78_300-425_1-144						KC78_300-425_1-144_sp	IP.000000_obj00047	109232	438.253	321.271	1248.95
IP.308797	KC78	IPE.08316	5.267	-44.133	300-425	KC_3-4_004	Unknown	KC78_300-425_1-144						KC78_300-425_1-144_sp	IP.000000_obj00008	178762	564.824	410.831	1608.36
IP.308800	KC78	IPE.08316	5.267	-44.133	300-425	KC_3-4_041	Neogloboquadrina dutertrei	KC78_300-425_1-144						KC78_300-425_1-144_sp	IP.000000_obj00067	205803	597.268	451.5	1738.61
IP.308803	KC78	IPE.08316	5.267	-44.133	300-425	KC_3-4_043	Globigerinoides ruber	KC78_300-425_1-144						KC78_300-425_1-144_sp	IP.000000_obj00066	135275	476.966	364.222	1395.98
IP.308804	KC78	IPE.08316	5.267	-44.133	300-425	KC_3-4_044	Globigerinoides ruber	KC78_300-425_1-144						KC78_300-425_1-144_sp	IP.000000_obj00068	104697	411.258	327.116	1202.48
IP.308806	KC78	IPE.08316	5.267	-44.133	300-425	KC_3-4_046	Globigerinoides sacculifer	KC78_300-425_1-144						KC78_300-425_1-144_sp	IP.000000_obj00062	188144	510.323	474.083	1634.66
IP.308807	KC78	IPE.08316	5.267	-44.133	300-425	KC_3-4_047	Globigerinoides sacculifer	KC78_300-425_1-144						KC78_300-425_1-144_sp	IP.000000_obj00057	115034	437.003	337.089	1245.08
IP.308809	KC78	IPE.08316	5.267	-44.133	300-425	KC_3-4_049	Globigerinoides sacculifer	KC78_300-425_1-144						KC78_300-425_1-144_sp	IP.000000_obj00061	118203	409.276	380.237	1298.55
IP.308810	KC78	IPE.08316	5.267	-44.133	300-425	KC_3-4_005	Globigerinoides ruber	KC78_300-425_1-144						KC78_300-425_1-144_sp	IP.000000_obj00007	120534	433.735	360.839	1314.41
IP.308811	KC78	IPE.08316	5.267	-44.133	300-425	KC_3-4_050	Neogloboquadrina dutertrei	KC78_300-425_1-144						KC78_300-425_1-144_sp	IP.000000_obj00059	143711	536.818	346.753	1483.14
IP.308813	KC78	IPE.08316	5.267	-44.133	300-425	KC_3-4_051	Globigerinoides ruber	KC78_300-425_1-144						KC78_300-425_1-144_sp	IP.000000_obj00080	177039	543.92	424.134	1643.96
IP.308814	KC78	IPE.08316	5.267	-44.133	300-425	KC_3-4_052	Globigerinoides sacculifer	KC78_300-425_1-144						KC78_300-425_1-144_sp	IP.000000_obj00079	115947	421.846	359.928	1318.48
IP.308815	KC78	IPE.08316	5.267	-44.133	300-425	KC_3-4_053	Globigerinoides sacculifer	KC78_300-425_1-144						KC78_300-425_1-144_sp	IP.000000_obj00077	269787	730.376	475.333	1990.98
IP.308816	KC78	IPE.08316	5.267	-44.133	300-425	KC_3-4_054	Globigerinoides sacculifer	KC78_300-425_1-144						KC78_300-425_1-144_sp	IP.000000_obj00075	135622	481.864	376.415	1463.12
IP.308817	KC78	IPE.08316	5.267	-44.133	300-425	KC_3-4_055	Globigerinoides sacculifer	KC78_300-425_1-144						KC78_300-425_1-144_sp	IP.000000_obj00076	182180	581.382	404.556	3315.43
IP.308818	KC78	IPE.08316	5.267	-44.133	300-425	KC_3-4_056	Globigerinoides sacculifer	KC78_300-425_1-144						KC78_300-425_1-144_sp	IP.000000_obj00078	83376	374.567	286.295	1086.57
IP.308819	KC78	IPE.08316	5.267	-44.133	300-425	KC_3-4_057	Globigerinoides sacculifer	KC78_300-425_1-144						KC78_300-425_1-144_sp	IP.000000_obj00071	184473	598.104	398.339	3424.01
IP.308820	KC78	IPE.08316	5.267	-44.133	300-425	KC_3-4_058	Globigerinoides ruber	KC78_300-425_1-144						KC78_300-425_1-144_sp	IP.000000_obj00074	103778	398.153	339.839	1212.09
IP.308821	KC78	IPE.08316	5.267	-44.133	300-425	KC_3-4_059	Globigerinoides sacculifer	KC78_300-425_1-144						KC78_300-425_1-144_sp	IP.000000_obj00073	116013	430.702	351.812	1303.59
IP.308822	KC78	IPE.08316	5.267	-44.133	300-425	KC_3-4_006	Globigerinoides sacculifer	KC78_300-425_1-144						KC78_300-425_1-144_sp	IP.000000_obj00006	122602	428.753	372.566	1374.7
IP.308823	KC78	IPE.08316	5.267	-44.133	300-425	KC_3-4_060	Globigerinoides sacculifer	KC78_300-425_1-144						KC78_300-425_1-144_sp	IP.000000_obj00072	197871	586.052	448.381	1725.51
IP.308824	KC78	IPE.08316	5.267	-44.133	300-425	KC_3-4_061	Globorotalia menardii	KC78_300-425_1-144						KC78_300-425_1-144_sp	IP.000000_obj00090	177810	547.224	416.381	1594.9
IP.308825	KC78	IPE.08316	5.267	-44.133	300-425	KC_3-4_062	Globigerinella siphonifera	KC78_300-425_1-144						KC78_300-425_1-144_sp	IP.000000_obj00086	188267	594.943	415.445	1701.37
IP.308826	KC78	IPE.08316	5.267	-44.133	300-425	KC_3-4_063	Unknown	KC78_300-425_1-144						KC78_300-425_1-144_sp	IP.000000_obj00083	170746	563.011	392.295	1578.83
IP.308828	KC78	IPE.08316	5.267	-44.133	300-425	KC_3-4_065	Globigerinoides ruber	KC78_300-425_1-144						KC78_300-425_1-144_sp	IP.000000_obj00088	220268	661.921	432.302	3691.66
IP.308829	KC78	IPE.08316	5.267	-44.133	300-425	KC_3-4_066	Globigerinoides sacculifer	KC78_300-425_1-144						KC78_300-425_1-144_sp	IP.000000_obj00087	163541	537.796	395.093	1522.48
IP.308830	KC78	IPE.08316	5.267	-44.133	300-425	KC_3-4_067	Globigerinoides ruber	KC78_300-425_1-144						KC78_300-425_1-144_sp	IP.000000_obj00081	178584	540.367	431.715	1603.04
IP.308831	KC78	IPE.08316	5.267	-44.133	300-425	KC_3-4_068	Globigerinoides ruber	KC78_300-425_1-144						KC78_300-425_1-144_sp	IP.000000_obj00084	258443	637.688	523.539	1916.4
IP.308832	KC78	IPE.08316	5.267	-44.133	300-425	KC_3-4_069	Globigerinoides ruber	KC78_300-425_1-144						KC78_300-425_1-144_sp	IP.000000_obj00085	138994	438.355	414.535	1406.12
IP.308833	KC78	IPE.08316	5.267	-44.133	300-425	KC_3-4_007	Globigerinoides ruber	KC78_300-425_1-144						KC78_300-425_1-144_sp	IP.000000_obj00002	110102	422.445	334.817	1234.41
IP.308834	KC78	IPE.08316	5.267	-44.133	300-425	KC_3-4_070	Globigerinoides sacculifer	KC78_300-425_1-144						KC78_300-425_1-144_sp	IP.000000_obj00082	146762	476.47	400.942	1460.04
IP.308835	KC78	IPE.08316	5.267	-44.133	300-425	KC_3-4_071	Globigerinoides ruber	KC78_300-425_1-144						KC78_300-425_1-144_sp	IP.000000_obj00099	170098	492.03	451.54	3450.94
IP.308836	KC78	IPE.08316	5.267	-44.133	300-425	KC_3-4_072	Globigerinoides ruber	KC78_300-425_1-144						KC78_300-425_1-144_sp	IP.000000_obj00101	150475	459.309	421.097	1414.72
IP.308837	KC78	IPE.08316	5.267	-44.133	300-425	KC_3-4_073	Globorotalia menardii	KC78_300-425_1-144						KC78_300-425_1-144_sp	IP.000000_obj00096	135157	487.354	358.841	1427.93
IP.308838	KC78	IPE.08316	5.267	-44.133	300-425	KC_3-4_074	Globigerinoides sacculifer	KC78_300-425_1-144						KC78_300-425_1-144_sp	IP.000000_obj00098	193680	573.997	444.434	1715.03
IP.308839	KC78	IPE.08316	5.267	-44.133	300-425	KC_3-4_075	Neogloboquadrina dutertrei	KC78_300-425_1-144						KC78_300-425_1-144_sp	IP.000000_obj00097	168272	544.161	404.628	1560.78
IP.308840	KC78	IPE.08316	5.267	-44.133	300-425	KC_3-4_076	Globigerinoides sacculifer	KC78_300-425_1-144						KC78_300-425_1-144_sp	IP.000000_obj00094	152416	503.908	399.008	1541.36
IP.308841	KC78	IPE.08316	5.267	-44.133	300-425	KC_3-4_077	Globigerinoides sacculifer	KC78_300-425_1-144						KC78_300-425_1-144_sp	IP.000000_obj00093	189967	552.816	455.925	1729.69
IP.308842	KC78	IPE.08316	5.267	-44.133	300-425	KC_3-4_078	Globigerinoides sacculifer	KC78_300-425_1-144						KC78_300-425_1-144_sp	IP.000000_obj00092	146739	486.461	394.764	1453.77
IP.308843	KC78	IPE.08316	5.267	-44.133	300-425	KC_3-4_079	Globigerinella siphonifera	KC78_300-425_1-144						KC78_300-425_1-144_sp	IP.000000_obj00100	322096	694.616	595.554	2118.75
IP.308844	KC78	IPE.08316	5.267	-44.133	300-425	KC_3-4_008	Globigerinoides sacculifer	KC78_300-425_1-144						KC78_300-425_1-144_sp	IP.000000_obj00003	190747	574.054	432.18	1690.11
IP.308845	KC78	IPE.08316	5.267	-44.133	300-425	KC_3-4_080	Globigerinoides sacculifer	KC78_300-425_1-144						KC78_300-425_1-144_sp	IP.000000_obj00091	206338	519.106	508.495	1718.65
IP.308846	KC78	IPE.08316	5.267	-44.133	300-425	KC_3-4_081	Globigerinella siphonifera	KC78_300-425_1-144						KC78_300-425_1-144_sp	IP.000000_obj00112	115304	413.157	364.049	1283
IP.308847	KC78	IPE.08316	5.267	-44.133	300-425	KC_3-4_082	Globigerinoides ruber	KC78_300-425_1-144						KC78_300-425_1-144_sp	IP.000000_obj00110	200879	585.449	449.533	1725.12
IP.308848	KC78	IPE.08316	5.267	-44.133	300-425	KC_3-4_083	Globigerinoides sacculifer	KC78_300-425_1-144						KC78_300-425_1-144_sp	IP.000000_obj00111	160146	538.164	381.257	1474.09
IP.308849	KC78	IPE.08316	5.267	-44.133	300-425	KC_3-4_084	Pulleniatina obliquiloculata	KC78_300-425_1-144						KC78_300-425_1-144_sp	IP.000000_obj00108	189839	542.221	448.851	1617.48
IP.308850	KC78	IPE.08316	5.267	-44.133	300-425	KC_3-4_085	Globigerinoides sacculifer	KC78_300-425_1-144						KC78_300-425_1-144_sp	IP.000000_obj00109	119363	450.538	339.563	1304.46
IP.308851	KC78	IPE.08316	5.267	-44.133	300-425	KC_3-4_086	Globigerinoides sacculifer	KC78_300-425_1-144						KC78_300-425_1-144_sp	IP.000000_obj00105	184108	570.91	425.615	1707.63
IP.308852	KC78	IPE.08316	5.267	-44.133	300-425	KC_3-4_087	Globigerinoides sacculifer	KC78_300-425_1-144						KC78_300-425_1-144_sp	IP.000000_obj00104	128708	478.578	348.612	1365.26
IP.308853	KC78	IPE.08316	5.267	-44.133	300-425	KC_3-4_088	Globigerinoides sacculifer	KC78_300-425_1-144						KC78_300-425_1-144_sp	IP.000000_obj00103	116410	432.433	346.575	2578.86
IP.308855	KC78	IPE.08316	5.267	-44.133	300-425	KC_3-4_009	Globigerinoides sacculifer	KC78_300-425_1-144						KC78_300-425_1-144_sp	IP.000000_obj00001	216169	612.615	457.115	1806.27
IP.308856	KC78	IPE.08316	5.267	-44.133	300-425	KC_3-4_090	Globorotalia menardii	KC78_300-425_1-144						KC78_300-425_1-144_sp	IP.000000_obj00107	135255	469.225	372.252	1384.26
IP.308862	KC78	IPE.08316	5.267	-44.133	300-425	KC_3-4_096	Globigerinoides ruber	KC78_300-425_1-144						KC78_300-425_1-144_sp	IP.000000_obj00114	171880	574.638	393.363	1630.96
IP.308863	KC78	IPE.08316	5.267	-44.133	300-425	KC_3-4_097	Globigerinella siphonifera	KC78_300-425_1-144						KC78_300-425_1-144_sp	IP.000000_obj00113	154839	505.084	399.118	1497.5
IP.308864	KC78	IPE.08316	5.267	-44.133	300-425	KC_3-4_098	Pulleniatina obliquiloculata	KC78_300-425_1-144						KC78_300-425_1-144_sp	IP.000000_obj00115	130277	469.936	358.978	2793.2
IP.308866	KC78	IPE.08316	5.267	-44.133	425-600	KC_4-6_001	Globigerinoides sacculifer	Single Foram Images 1-32	kc78_obj00001	434150	891.626	644.51	5587.2	Single Foram Images 1-32	kc78_obj00001	225269	656.458	447.658	4129.93
IP.308867	KC78	IPE.08316	5.267	-44.133	425-600	KC_4-6_010	Globigerinoides sacculifer	Single Foram Images 1-32	kc78_obj00001	133599	499.119	348.549	1586.08	Single Foram Images 1-32
IP.308868	KC78	IPE.08316	5.267	-44.133	425-600	KC_4-6_010-2	Sphaeroidinella dehiscens	KC78_New_425-600_umb	KC78_obj00010	225303	605.381	478.436	4219.69	KC78_New_425-600_umb
IP.308870	KC78	IPE.08316	5.267	-44.133	425-600	KC_4-6_101	Globigerinoides sacculifer	KC78_425-650um_97to161_10x_umb	kc78_obj00005	316567	740.065	573.364	4740.77	kc78_425-650um_97to161_10x_sp	kc78_obj00006	316567	731.456	566.485	2215.43
IP.308871	KC78	IPE.08316	5.267	-44.133	425-600	KC_4-6_102	Globigerinoides sacculifer	KC78_425-650um_97to161_10x_umb	kc78_obj00008	352523	798.042	574.458	4739.74	kc78_425-650um_97to161_10x_sp	kc78_obj00005	362914	833.188	565.778	4770.72
IP.308872	KC78	IPE.08316	5.267	-44.133	425-600	KC_4-6_103	Orbulina universa	KC78_425-650um_97to161_10x_umb						kc78_425-650um_97to161_10x_sp	kc78_obj00008	297574	715.983	547.694	2165.71
IP.308873	KC78	IPE.08316	5.267	-44.133	425-600	KC_4-6_104	Globigerinoides sacculifer	KC78_425-650um_97to161_10x_umb	kc78_obj00009	314999	749.364	552.607	4633.48	kc78_425-650um_97to161_10x_sp
IP.308874	KC78	IPE.08316	5.267	-44.133	425-600	KC_4-6_105	Globigerinoides sacculifer	KC78_425-650um_97to161_10x_umb	kc78_obj00007	343100	802.432	554.133	2557.77	kc78_425-650um_97to161_10x_sp
IP.308875	KC78	IPE.08316	5.267	-44.133	425-600	KC_4-6_106	Globorotalia menardii	KC78_425-650um_97to161_10x_umb	kc78_obj00004	483284	858.9	732.62	2679.05	kc78_425-650um_97to161_10x_sp	kc78_obj00004	409615	780.665	681.761	2419.36
IP.308876	KC78	IPE.08316	5.267	-44.133	425-600	KC_4-6_107	Globigerinoides sacculifer	KC78_425-650um_97to161_10x_umb	kc78_obj00010	396833	863.506	598.09	2592.13	kc78_425-650um_97to161_10x_sp	kc78_obj00011	425197	878.775	631.251	2535.56
IP.308877	KC78	IPE.08316	5.267	-44.133	425-600	KC_4-6_108	Globigerinoides sacculifer	KC78_425-650um_97to161_10x_umb	kc78_obj00013	262444	683.704	499.653	4351.35	kc78_425-650um_97to161_10x_sp	kc78_obj00017	292398	703.597	545.439	2168.26
IP.308878	KC78	IPE.08316	5.267	-44.133	425-600	KC_4-6_109	Globigerinoides sacculifer	KC78_425-650um_97to161_10x_umb						kc78_425-650um_97to161_10x_sp	kc78_obj00014	406213	852.632	628.326	2480.02
IP.308879	KC78	IPE.08316	5.267	-44.133	425-600	KC_4-6_011	Globigerinoides sacculifer	Single Foram Images 1-32	kc78_obj00001	262223	705.764	490.556	4189.48	Single Foram Images 1-32	kc78_obj00001	260996	703	490.873	4192.36
[truncated: 487 more rows]

## Sheet: ST3. 3dMorph
YPM Catalog Number	Locality	YPM Locality Code	Latitude	Longitude	Size Fraction (μm)	Specimen ID	Species ID	Slide ID - UMBILICAL	Segment ID - UMBILICAL	Volume_dome - UMBILICAL (μm3)	Volume_cylinder - UMBILICAL (μm3)	Volume_cone - UMBILICAL (μm3)	Volume_top - UMBILICAL (μm3)	Surface_area_dome - UMBILICAL (μm2)	Surface_area_cylinder - UMBILICAL (μm2)	Surface_area_cone - UMBILICAL (μm2)	Surface_area_top - UMBILICAL (μm2)	Height - UMBILICAL (μm)	Height (corrected) - UMBILICAL (μm)	Width - UMBILICAL (μm)	Length - UMBILICAL (μm)	SAscratch	SAscratch	SAscratch	Ellipse_Surface_Area - UMBILICAL (μm2)	Ellipse_Volume - UMBILICAL (μm3)	SA/V_Ellipse_umb	Slide ID - SPIRAL	Segment ID - SPIRAL	Volume_Dome -SPIRAL(μm3)	Volume_cylinder - SPIRAL (μm3)	Volume_cone - SPIRAL (μm3)	Volume_top - SPIRAL (μm3)	Surface_area_dome - SPIRAL (μm2)	Surface_area_cylinder - SPIRAL (μm2)	Surface_area_cone - SPIRAL (μm2)	Surface_area_top - SPIRAL (μm2)	height Spiral	Height cor	width Spiral	length Spiral	SAscratch	SAscratch	SAscratch	Ellipse_Surface_Area - SPIRAL (μm2)	Ellipse_Volume - SPIRAL (μm2)
[truncated: 719 more rows]

[truncated: 4 more sheets: ST4. Porosity, ST5.Cultured-Chambers, ST6. Cultured - Whole Tests , ST7. Core-top Habitat Data]
