# Supplementary figures and images for: Factors Influencing Porosity in Planktonic Foraminifera
Source: Copernicus journal article supplement (doi:10.5194/bg-2018-222), 2018-05-18

Supplementary Figure 3c

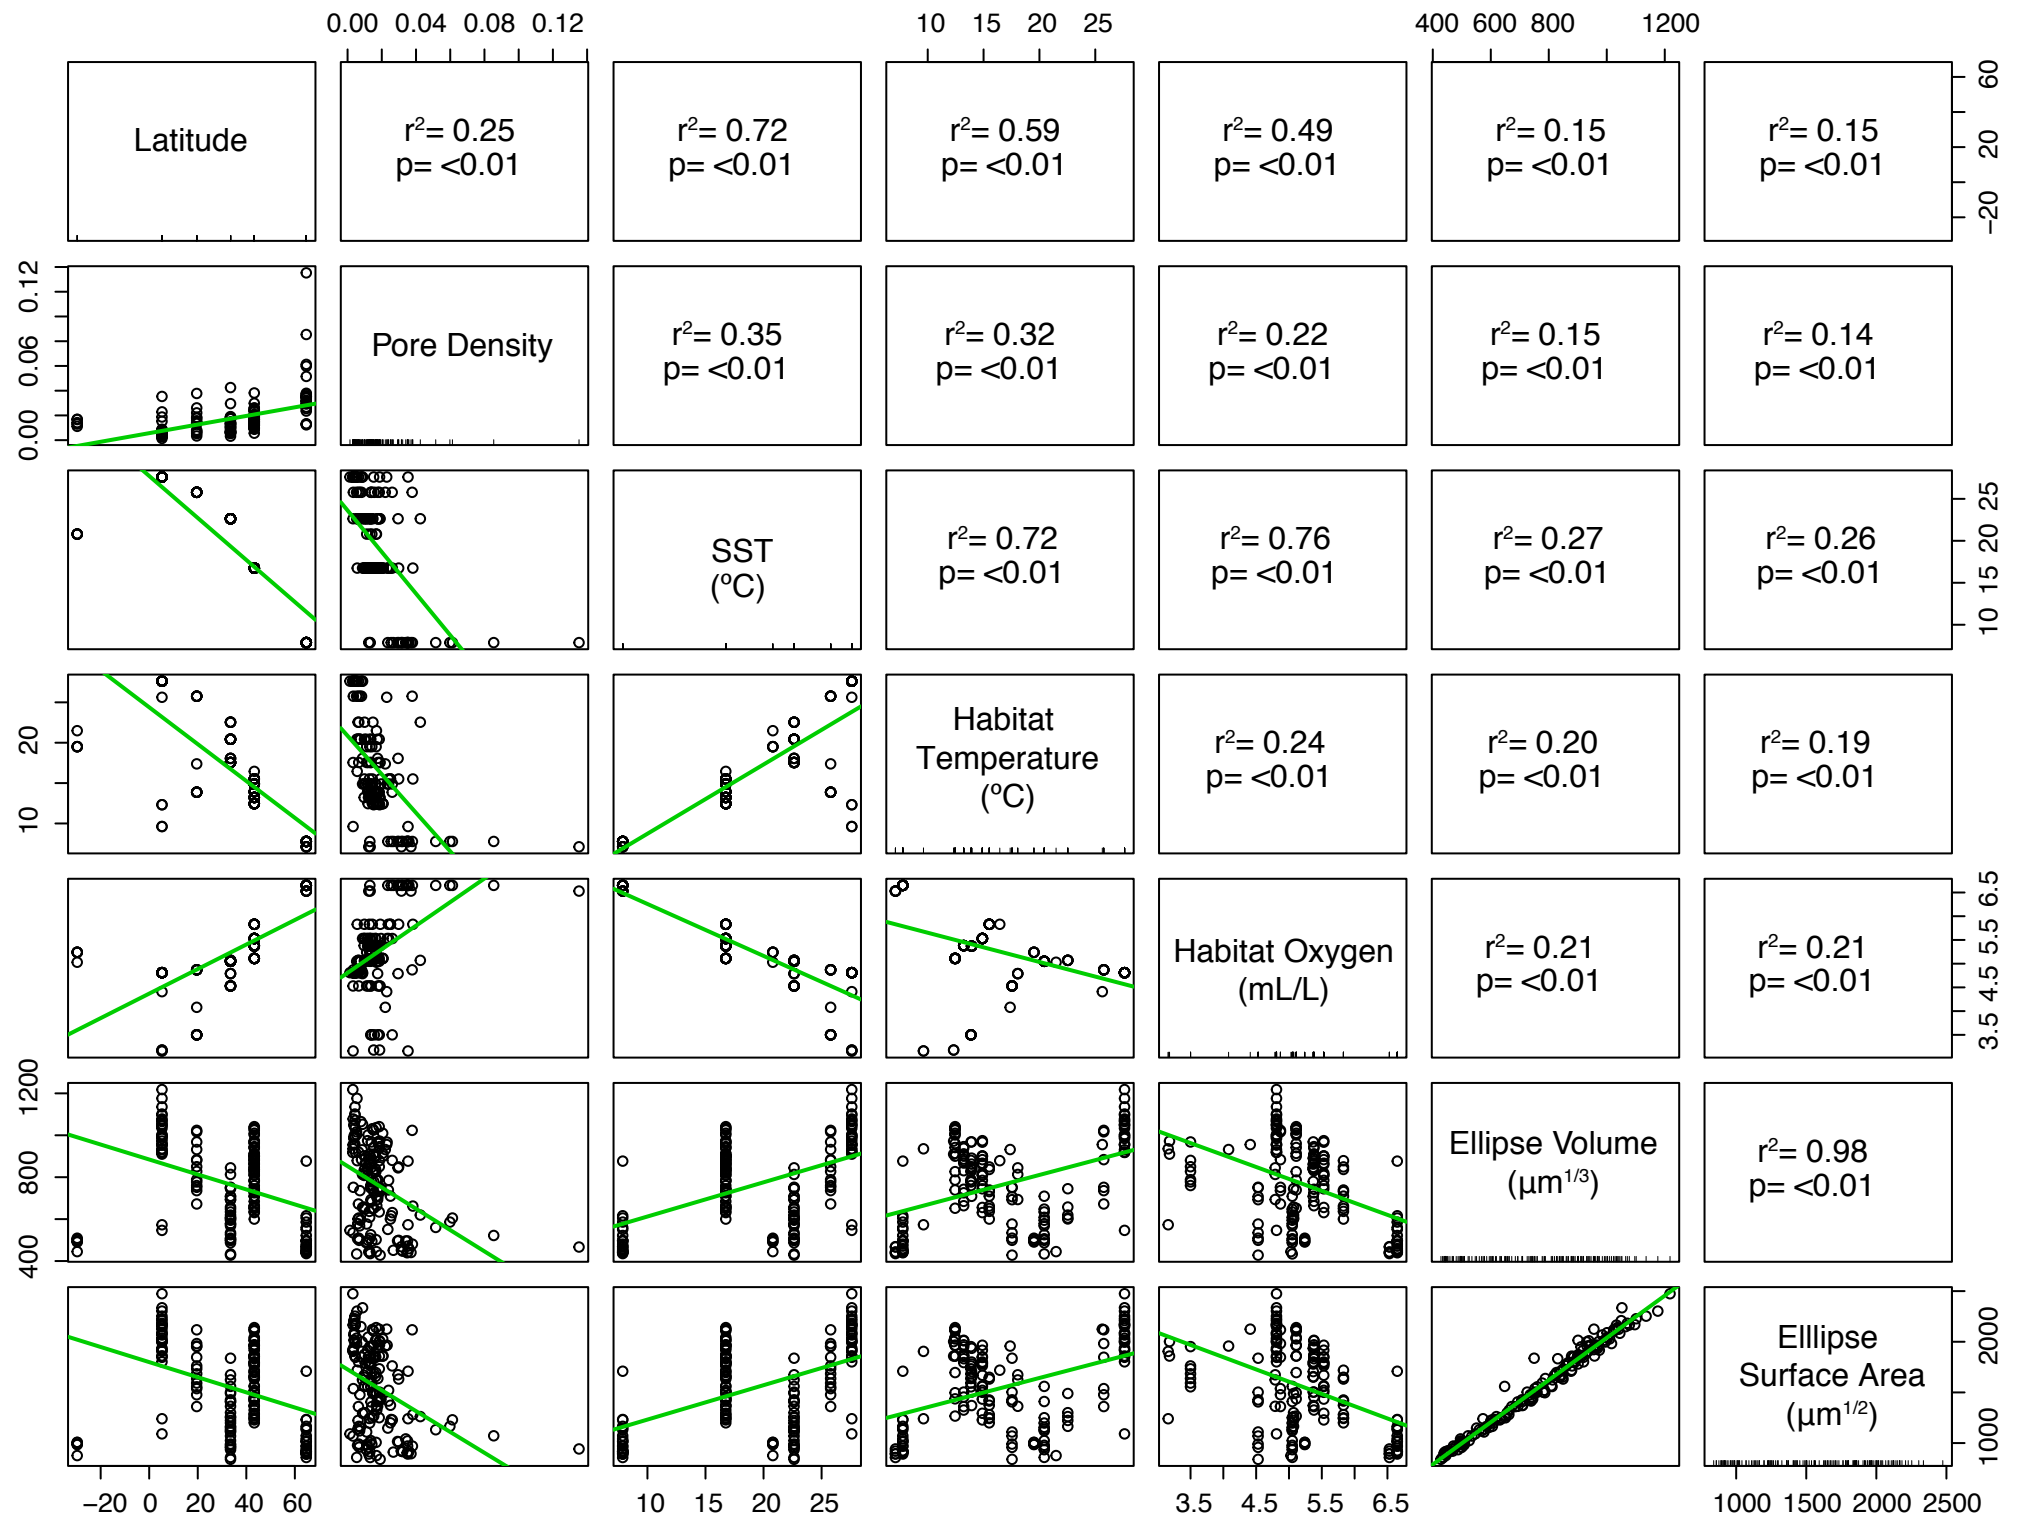

Supplement: Supplementary file 1 [file bg-2018-222-supplement.zip]

Supplementary Figure 6.

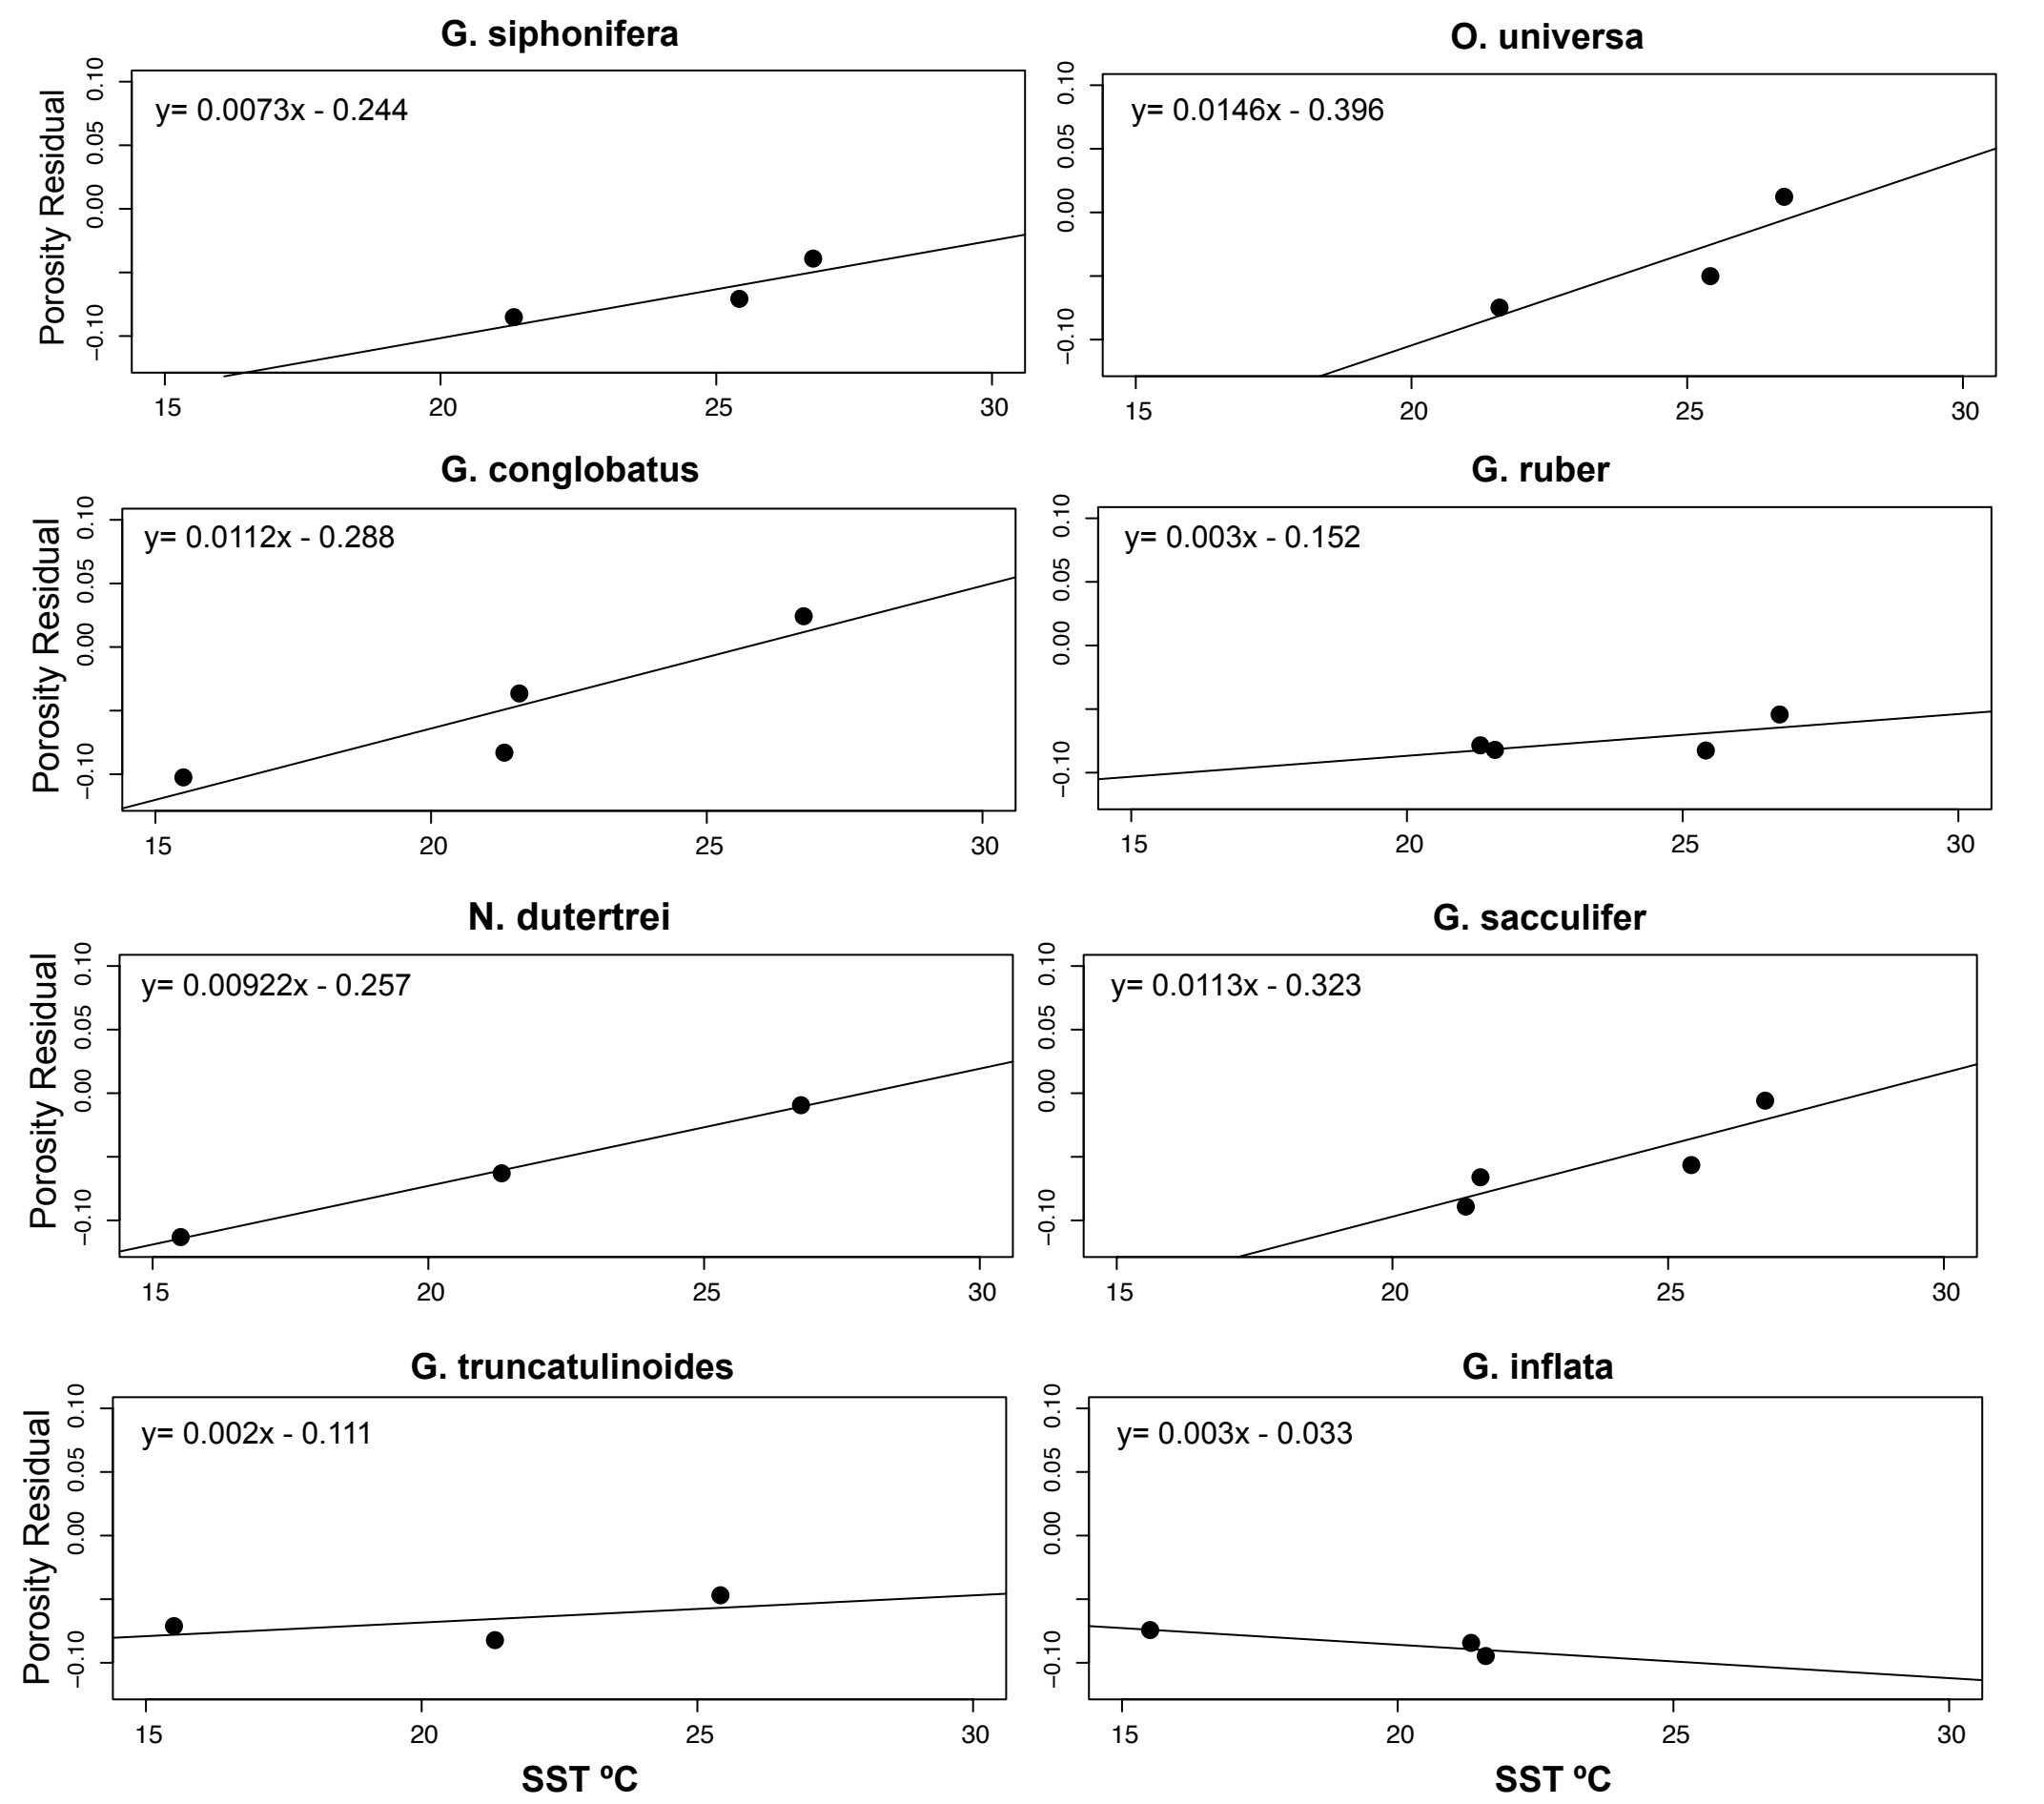

Supplement: Supplementary file 2 [file bg-2018-222-supplement.zip]

Supplemental Figure 3a

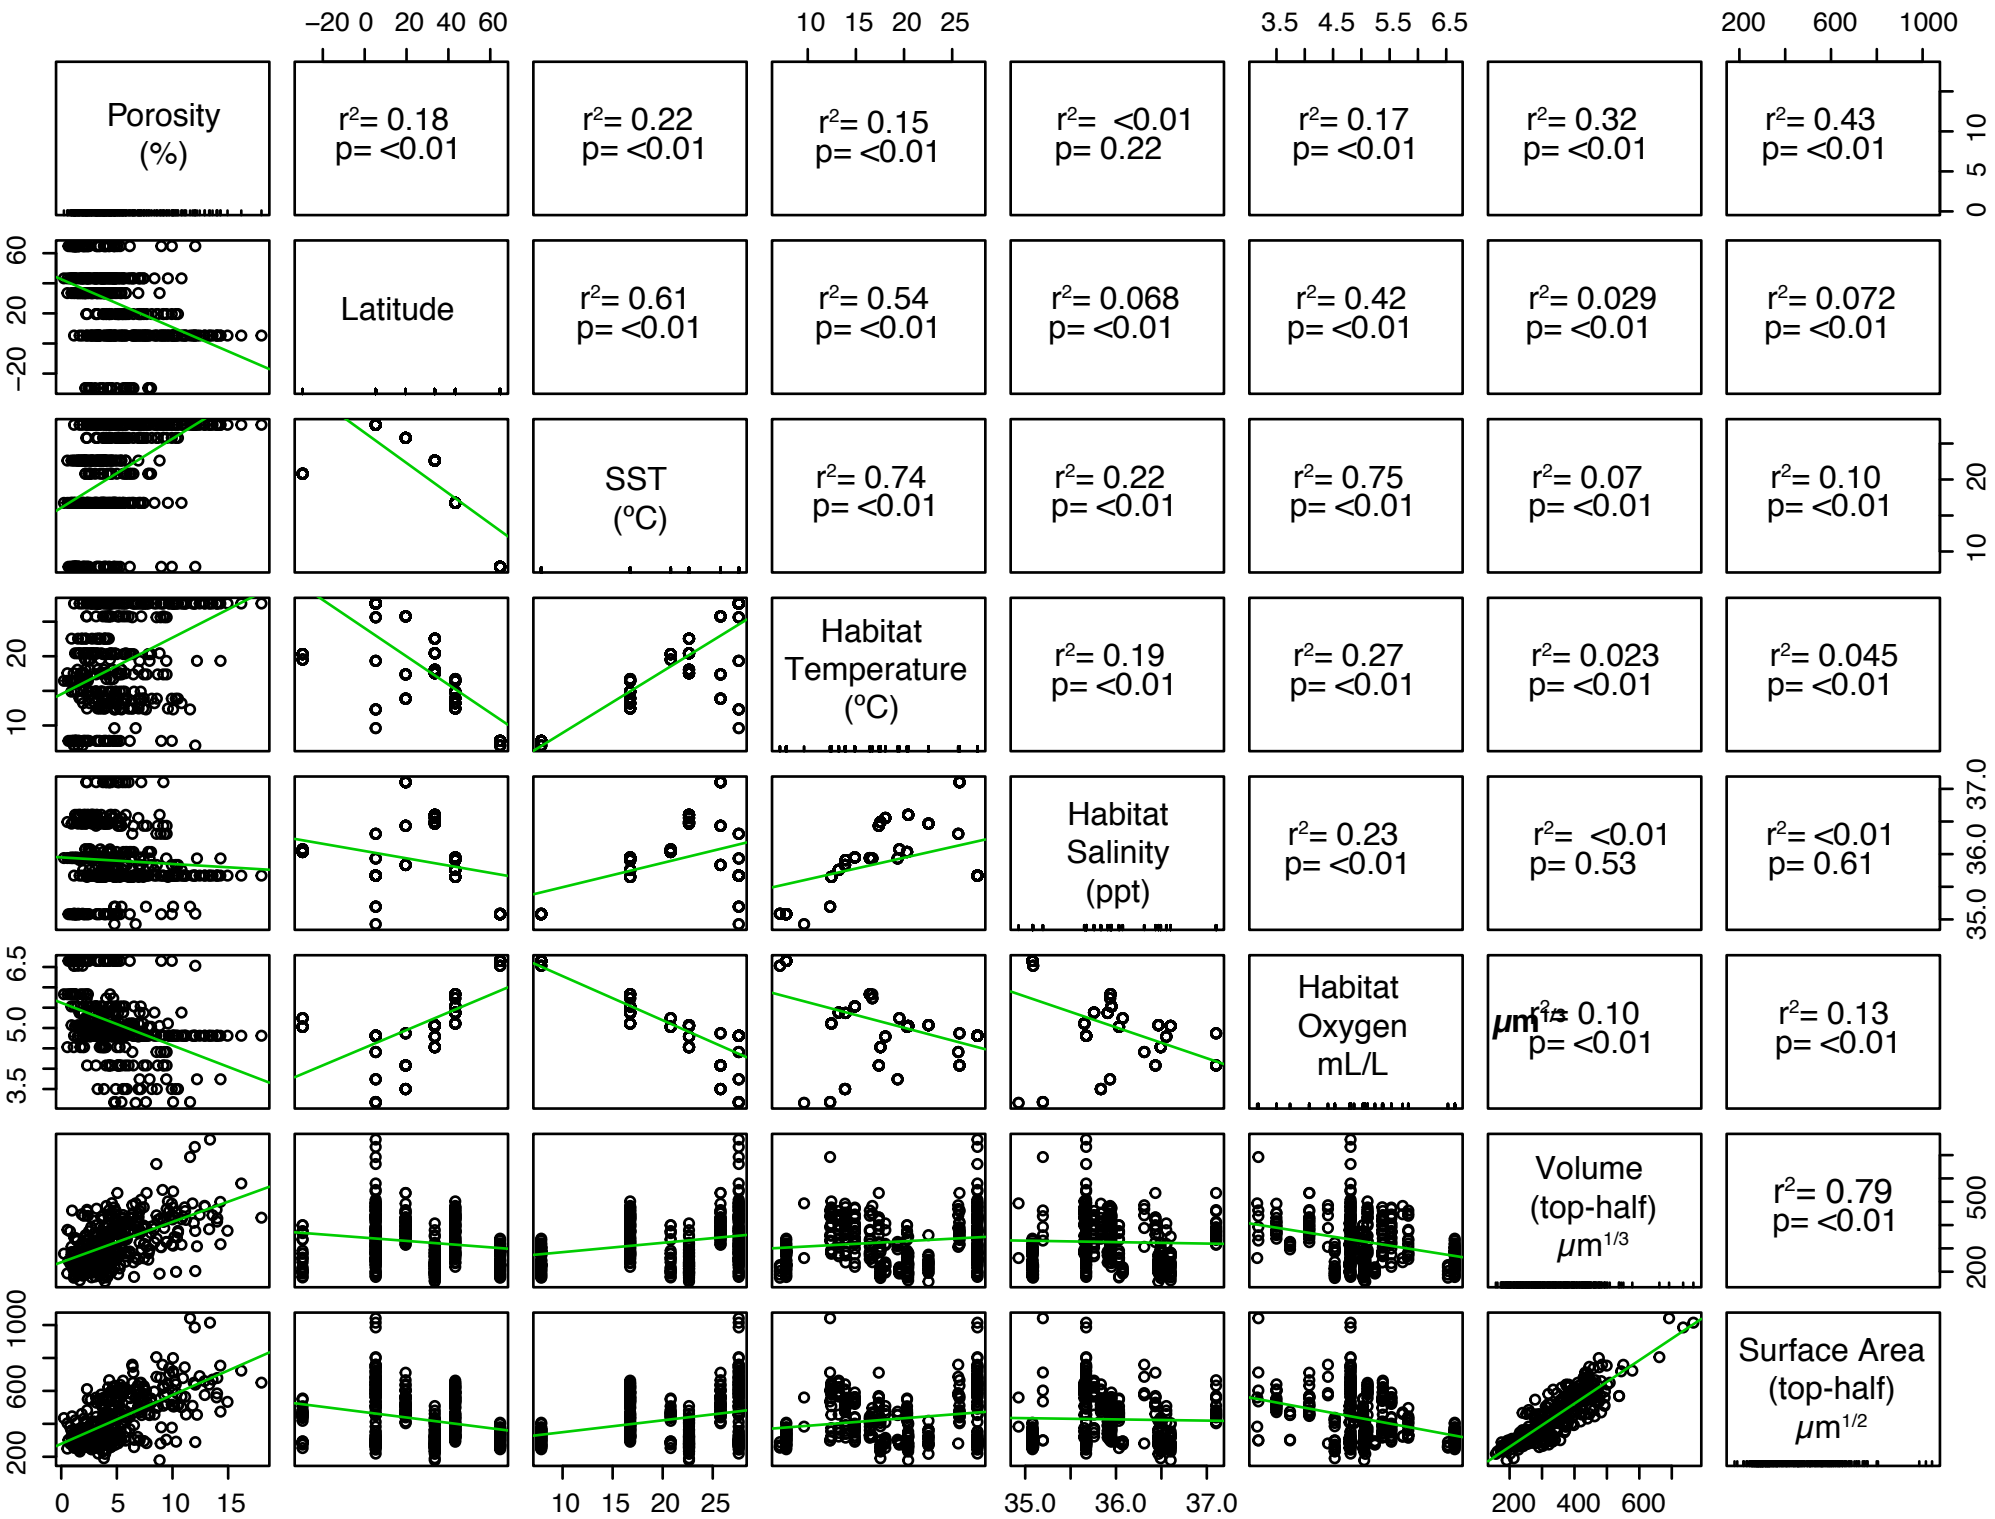

Supplement: Supplementary file 3 [file bg-2018-222-supplement.zip]

Supplementary Figure 4.

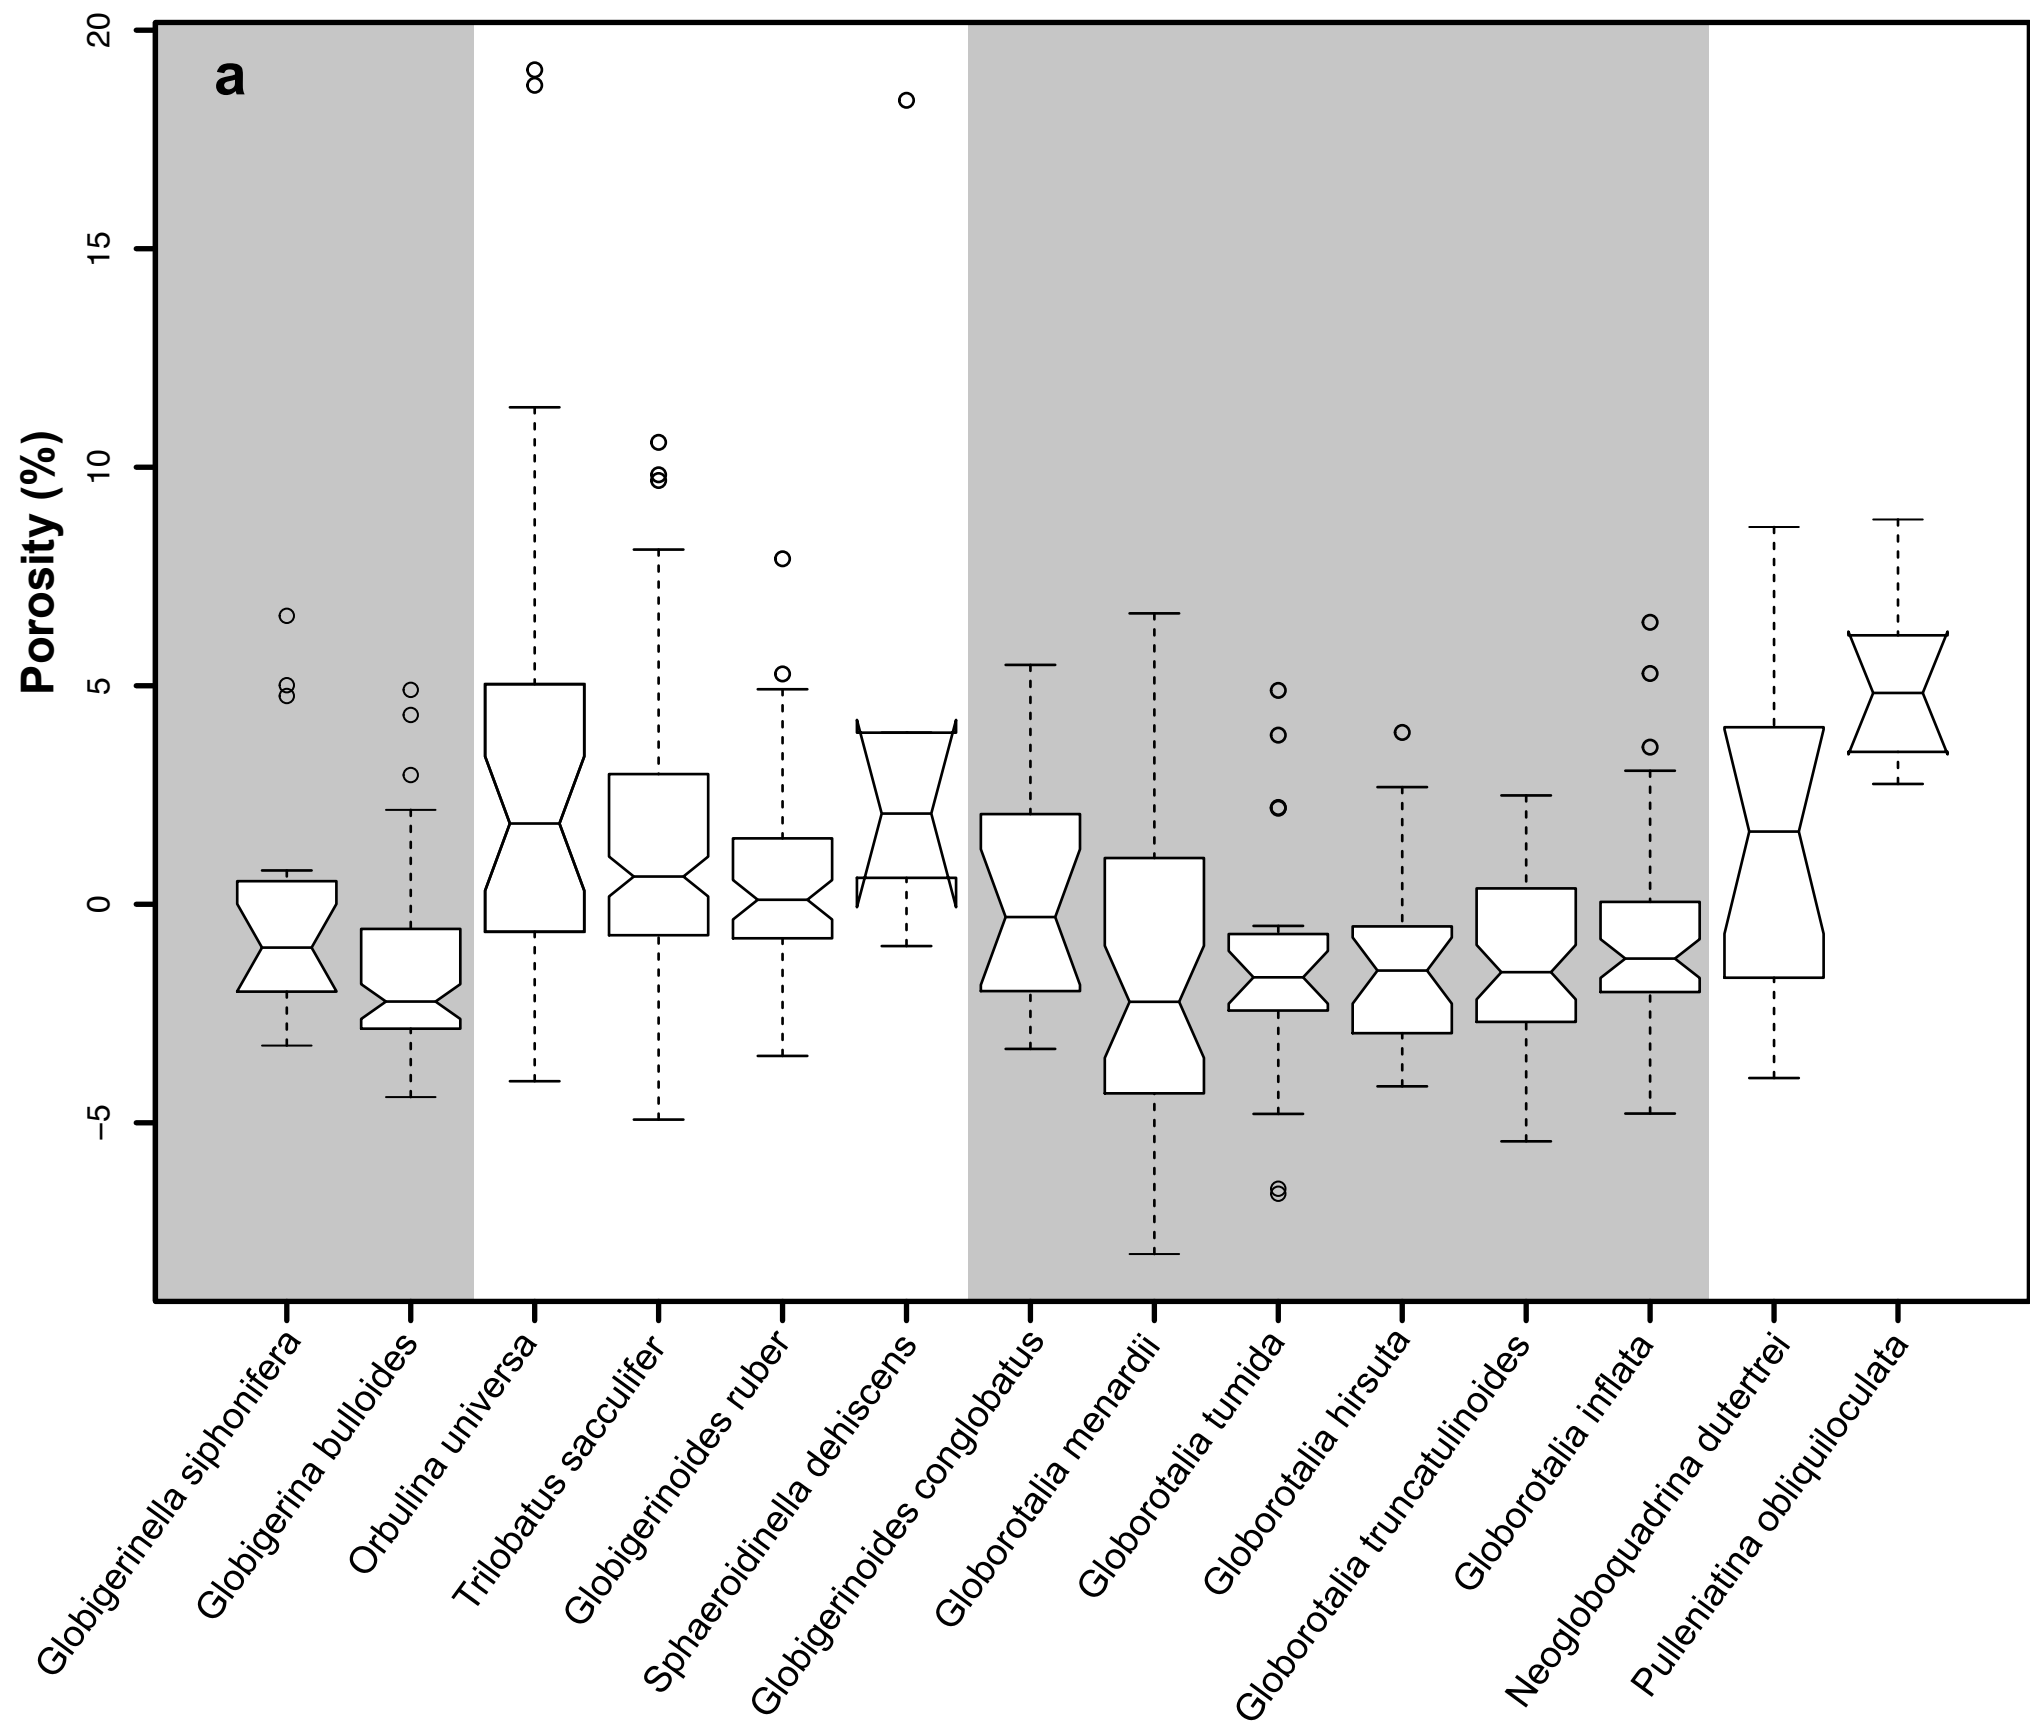

Supplement: Supplementary file 4 [file bg-2018-222-supplement.zip]

Supplemental Figure 5.

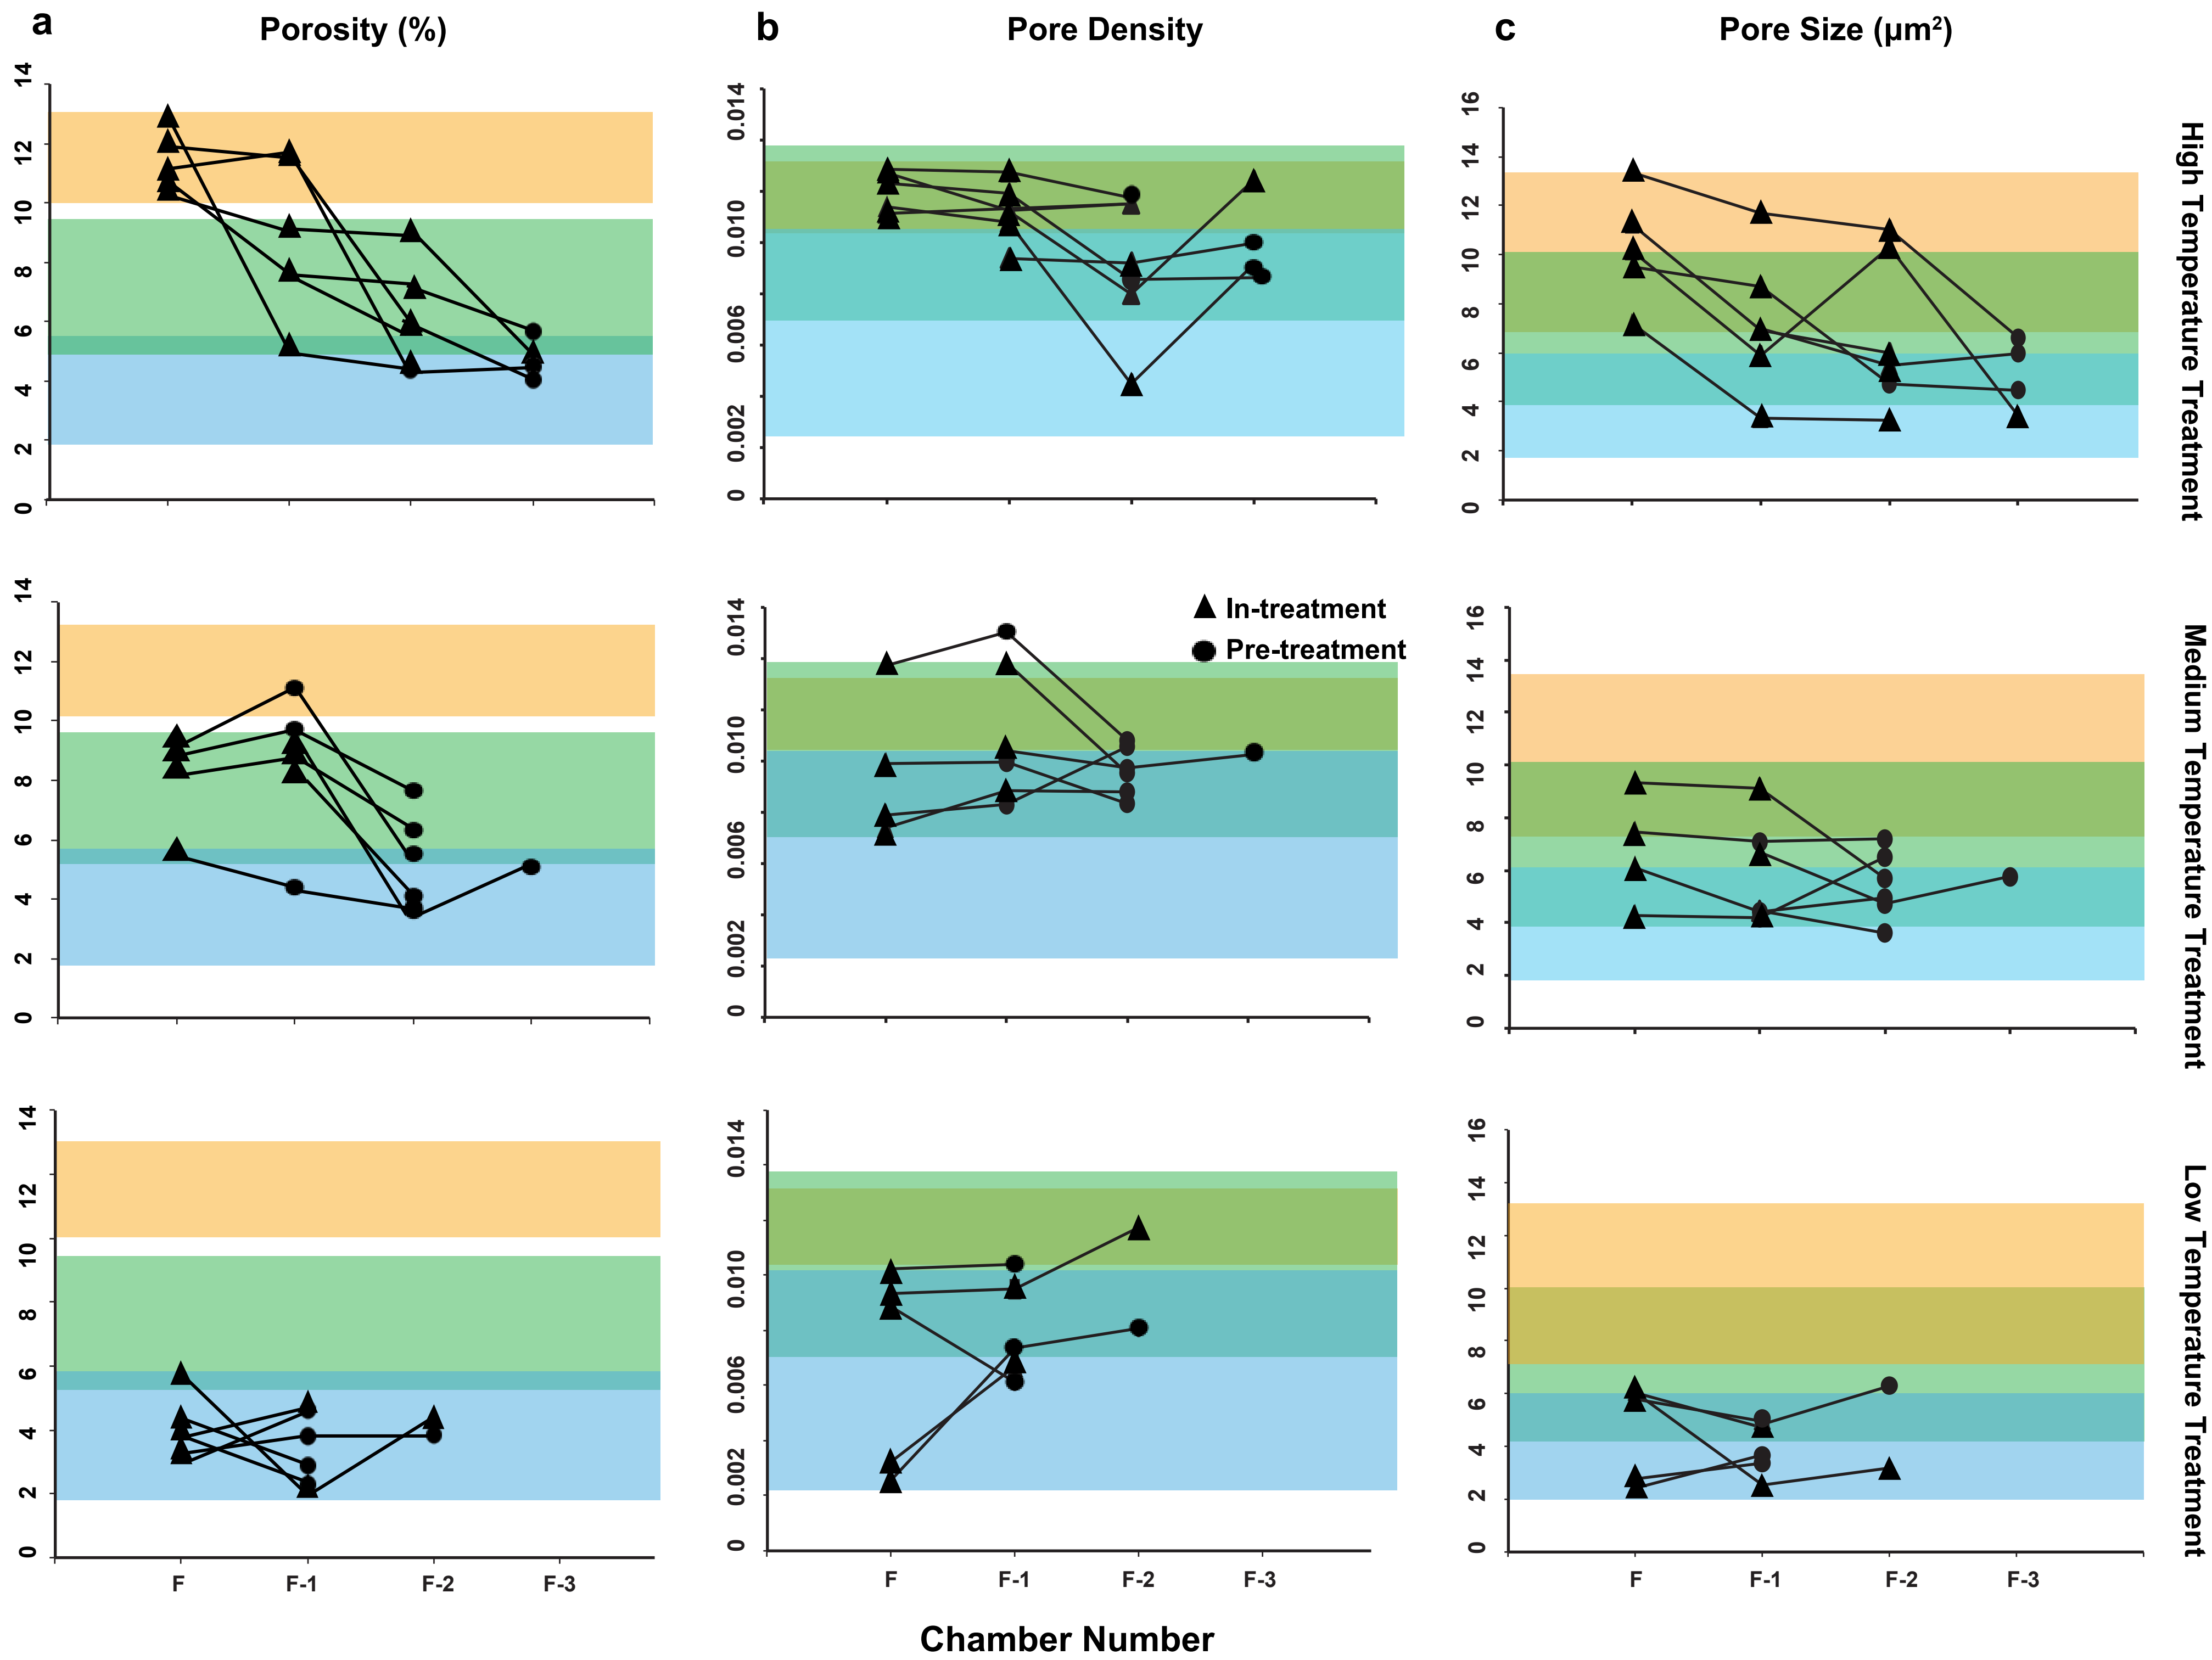

Supplement: Supplementary file 5 [file bg-2018-222-supplement.zip]

Supplemental Figure 2.

Spiral / Umbilical Side Comparisons

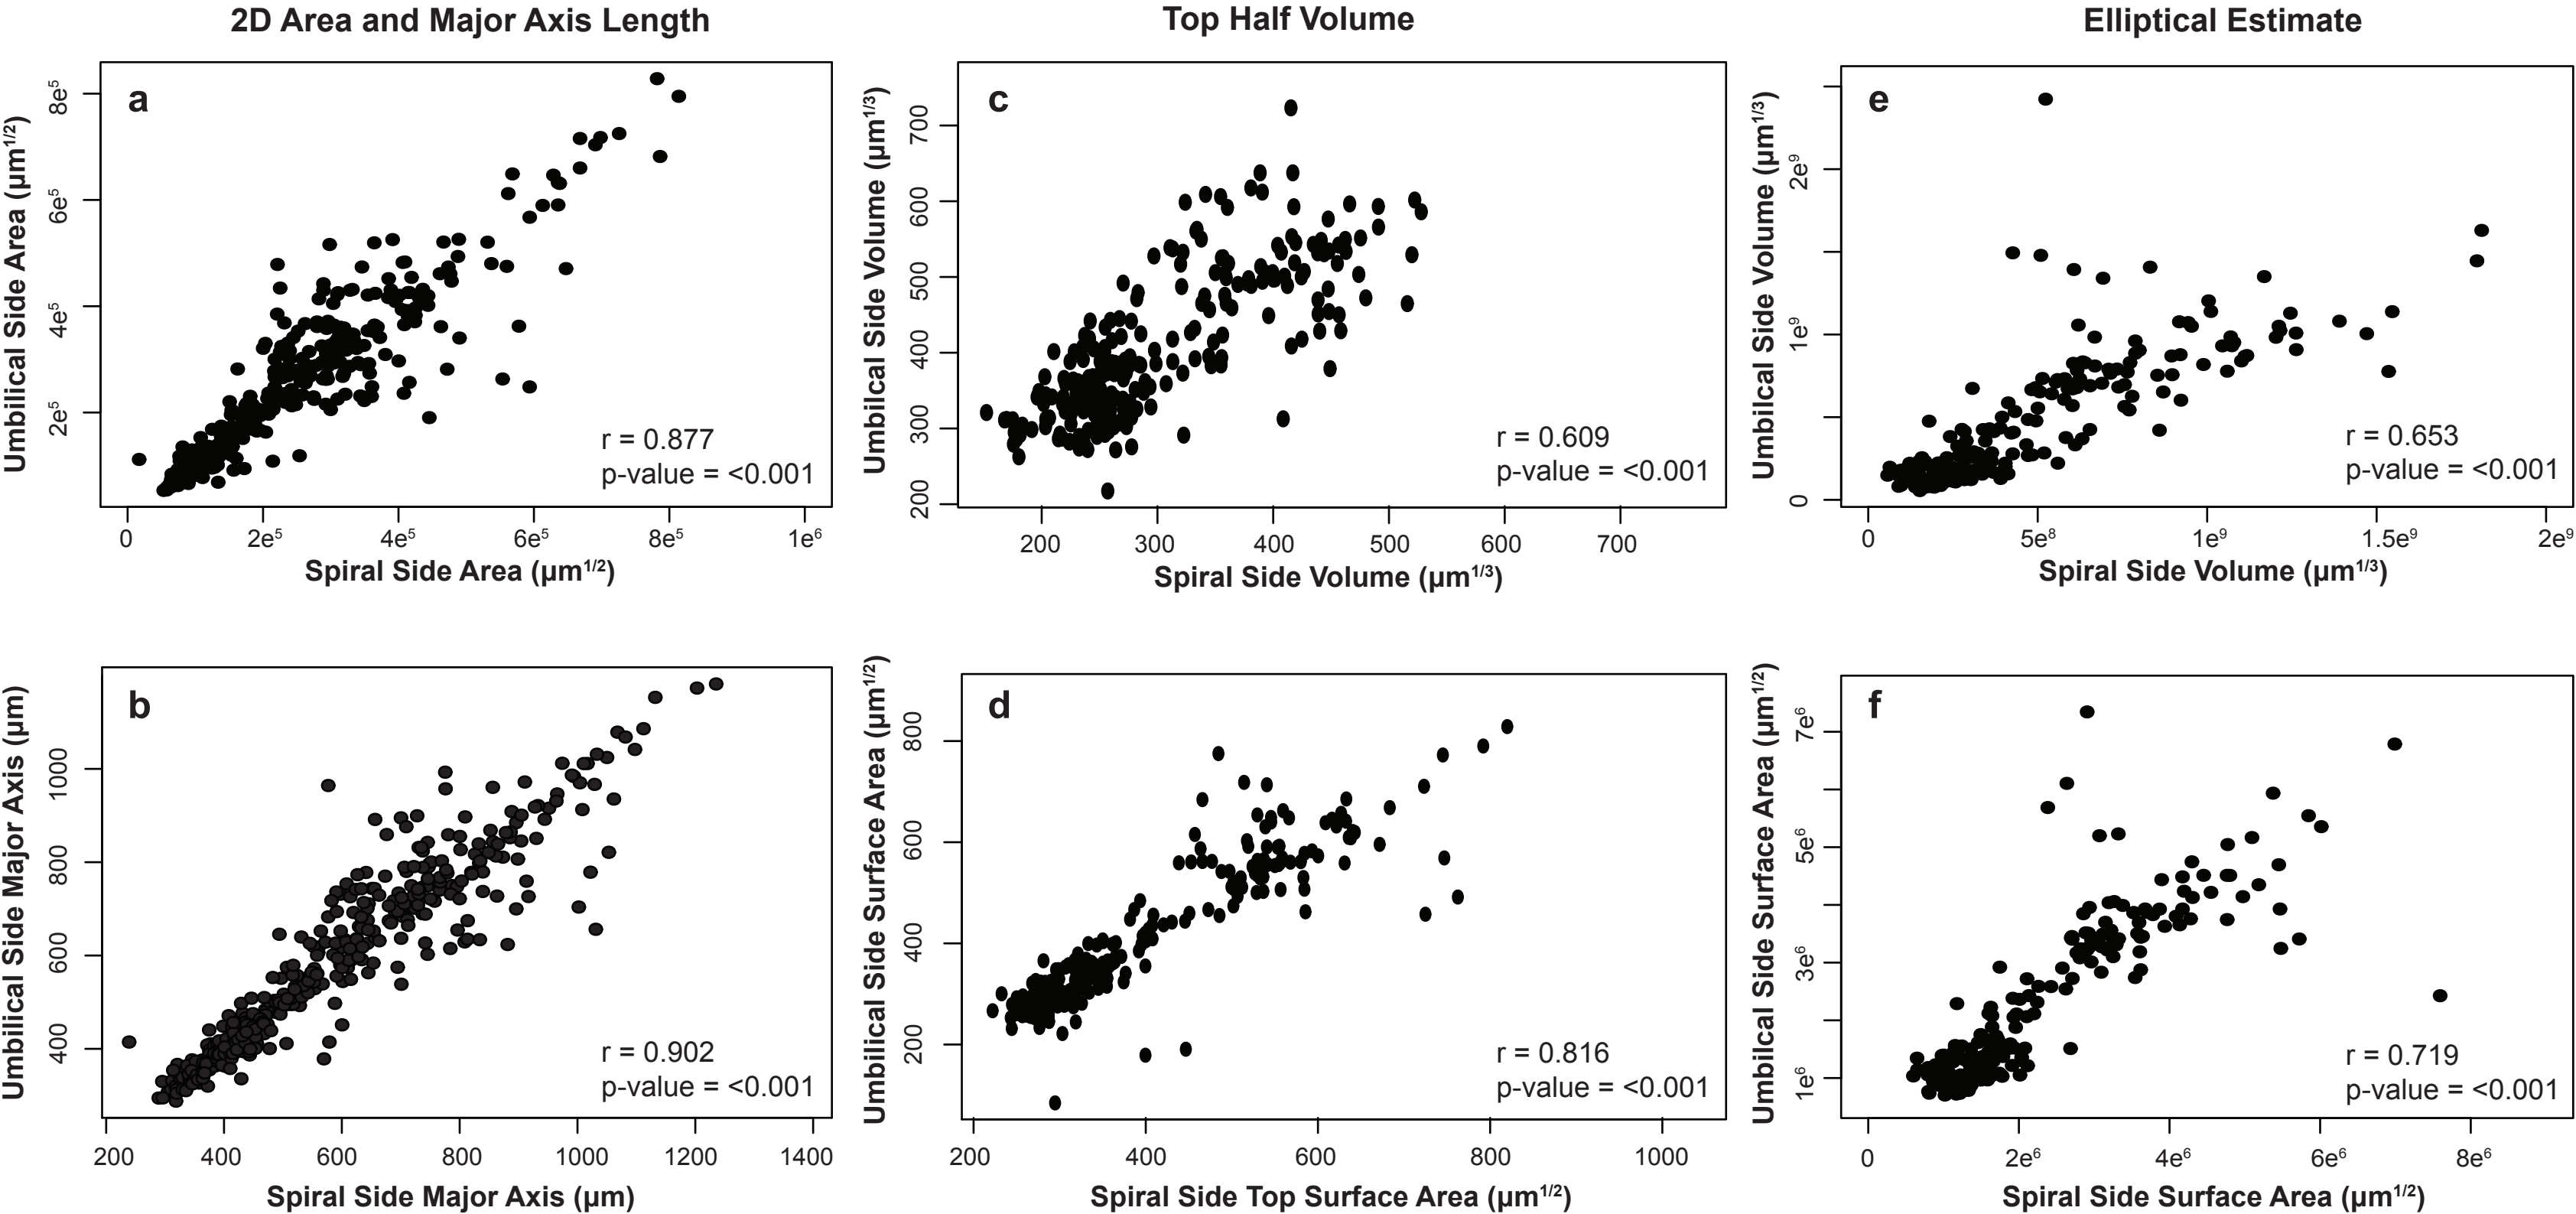

Supplement: Supplementary file 6 [file bg-2018-222-supplement.zip]

Supplementary Figure 4c.

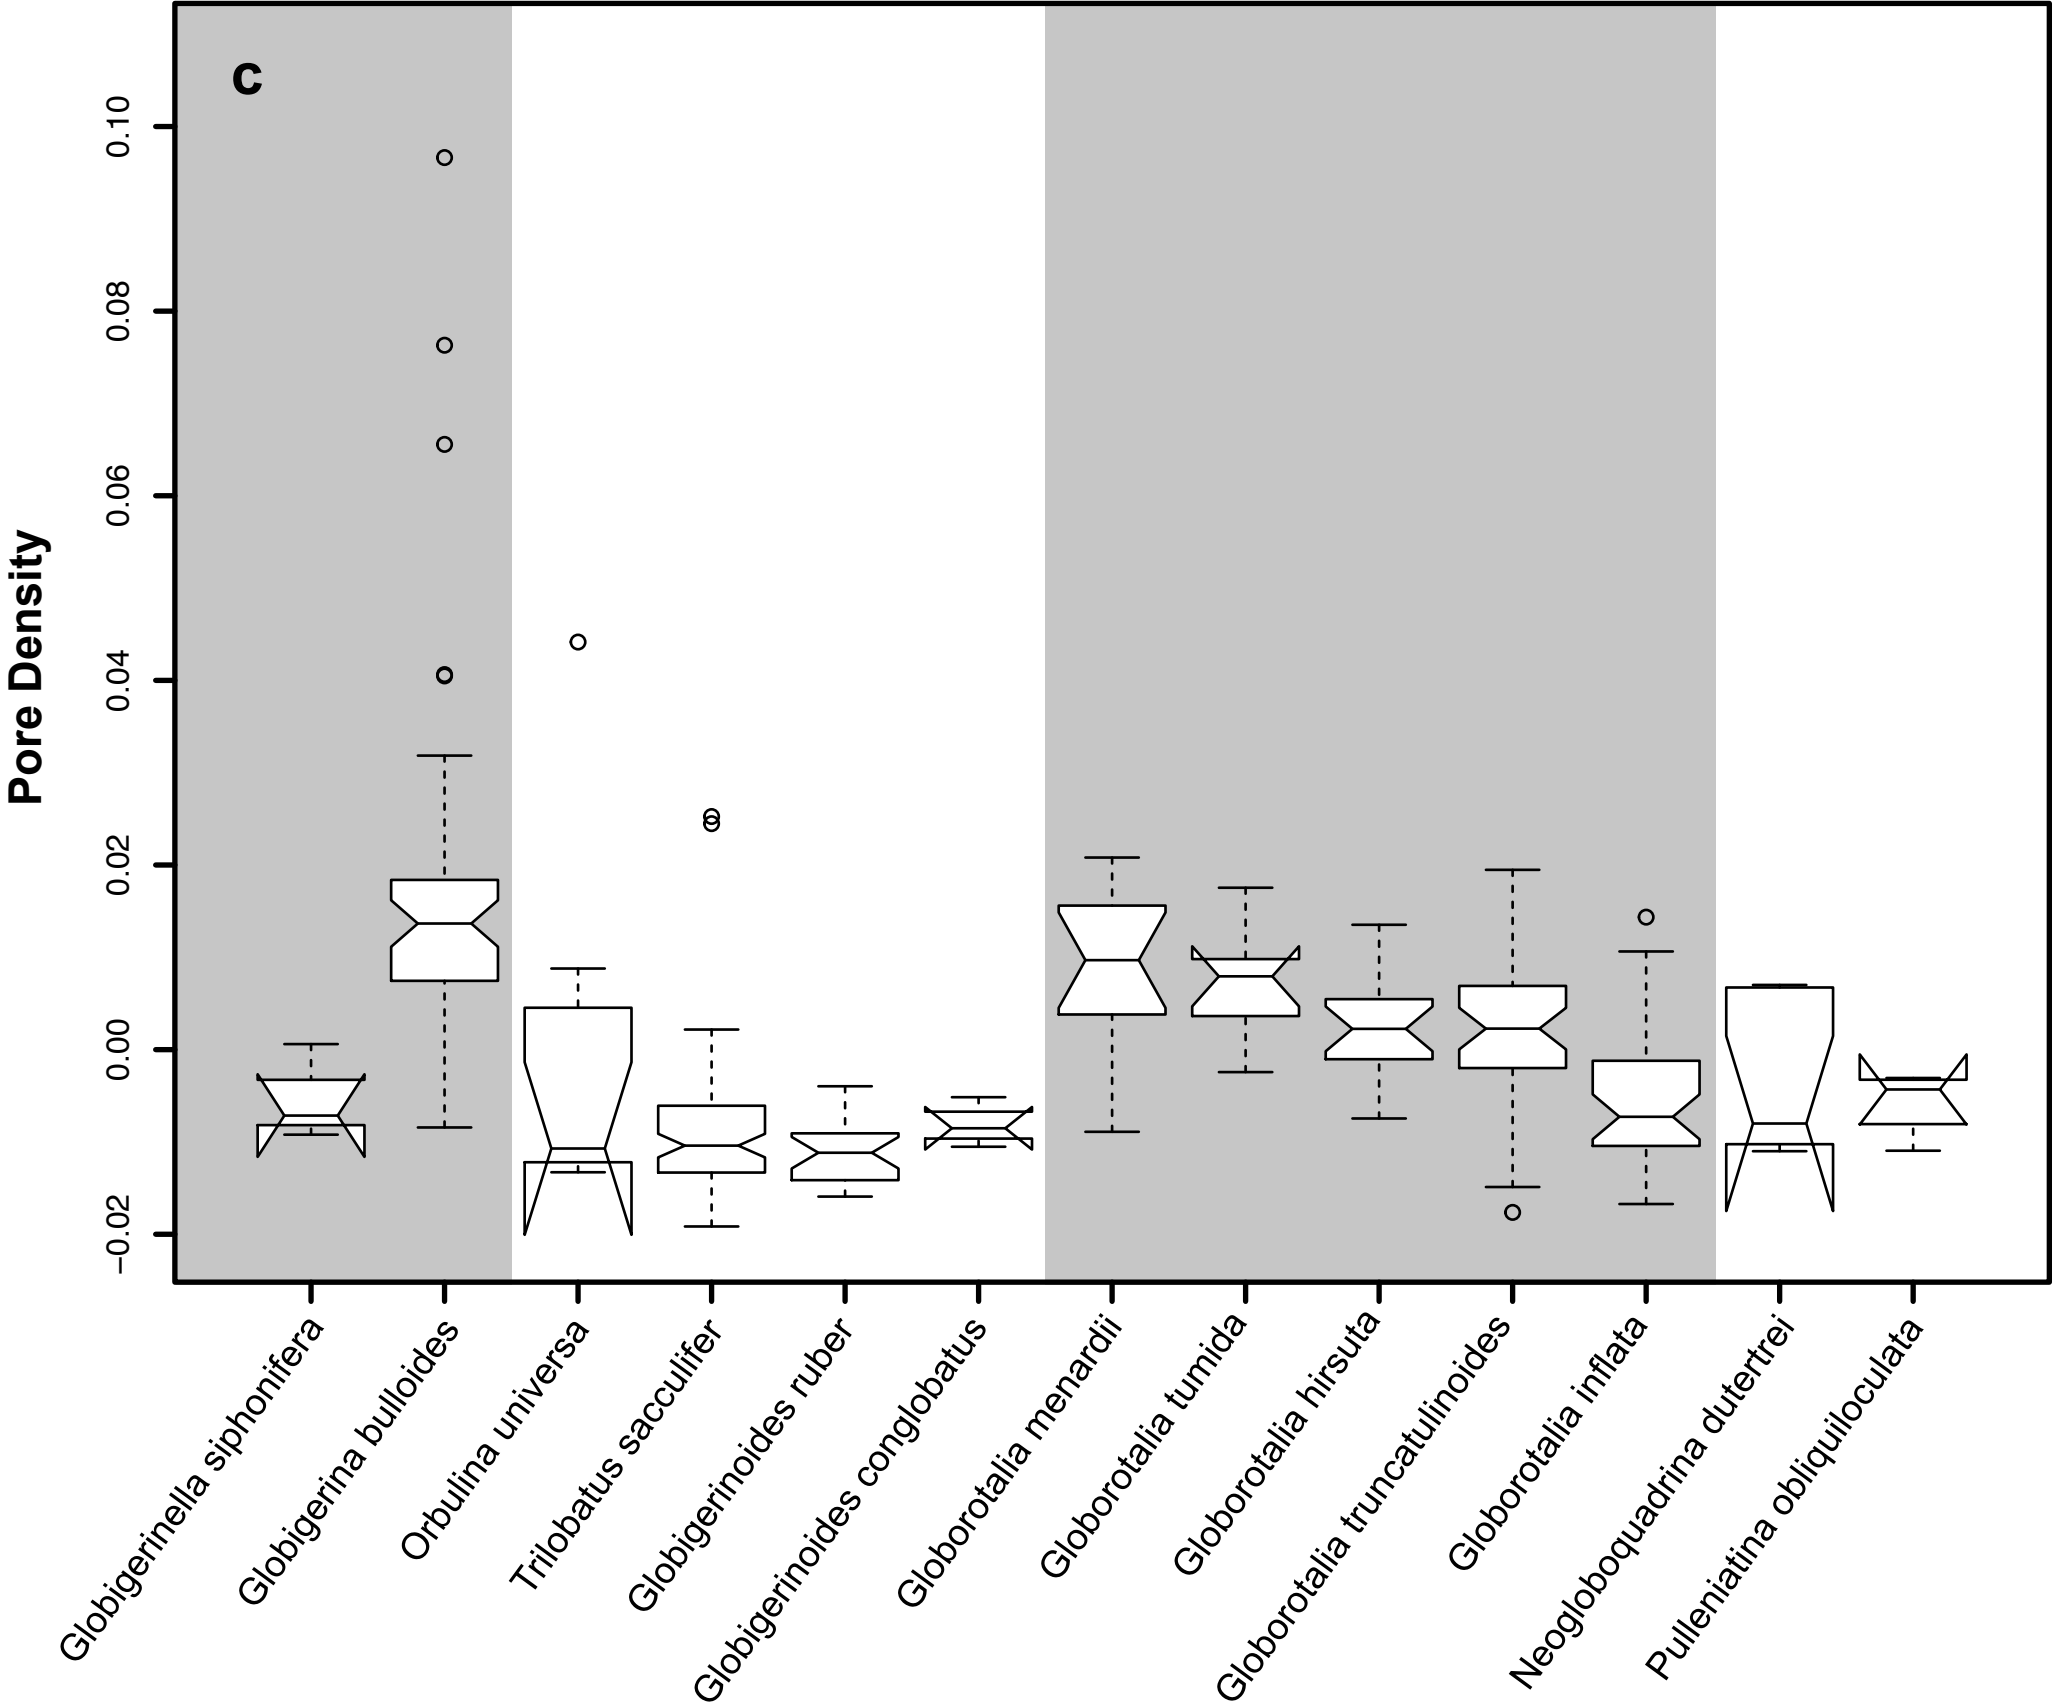

Supplement: Supplementary file 7 [file bg-2018-222-supplement.zip]

Supplemental Figure 3b

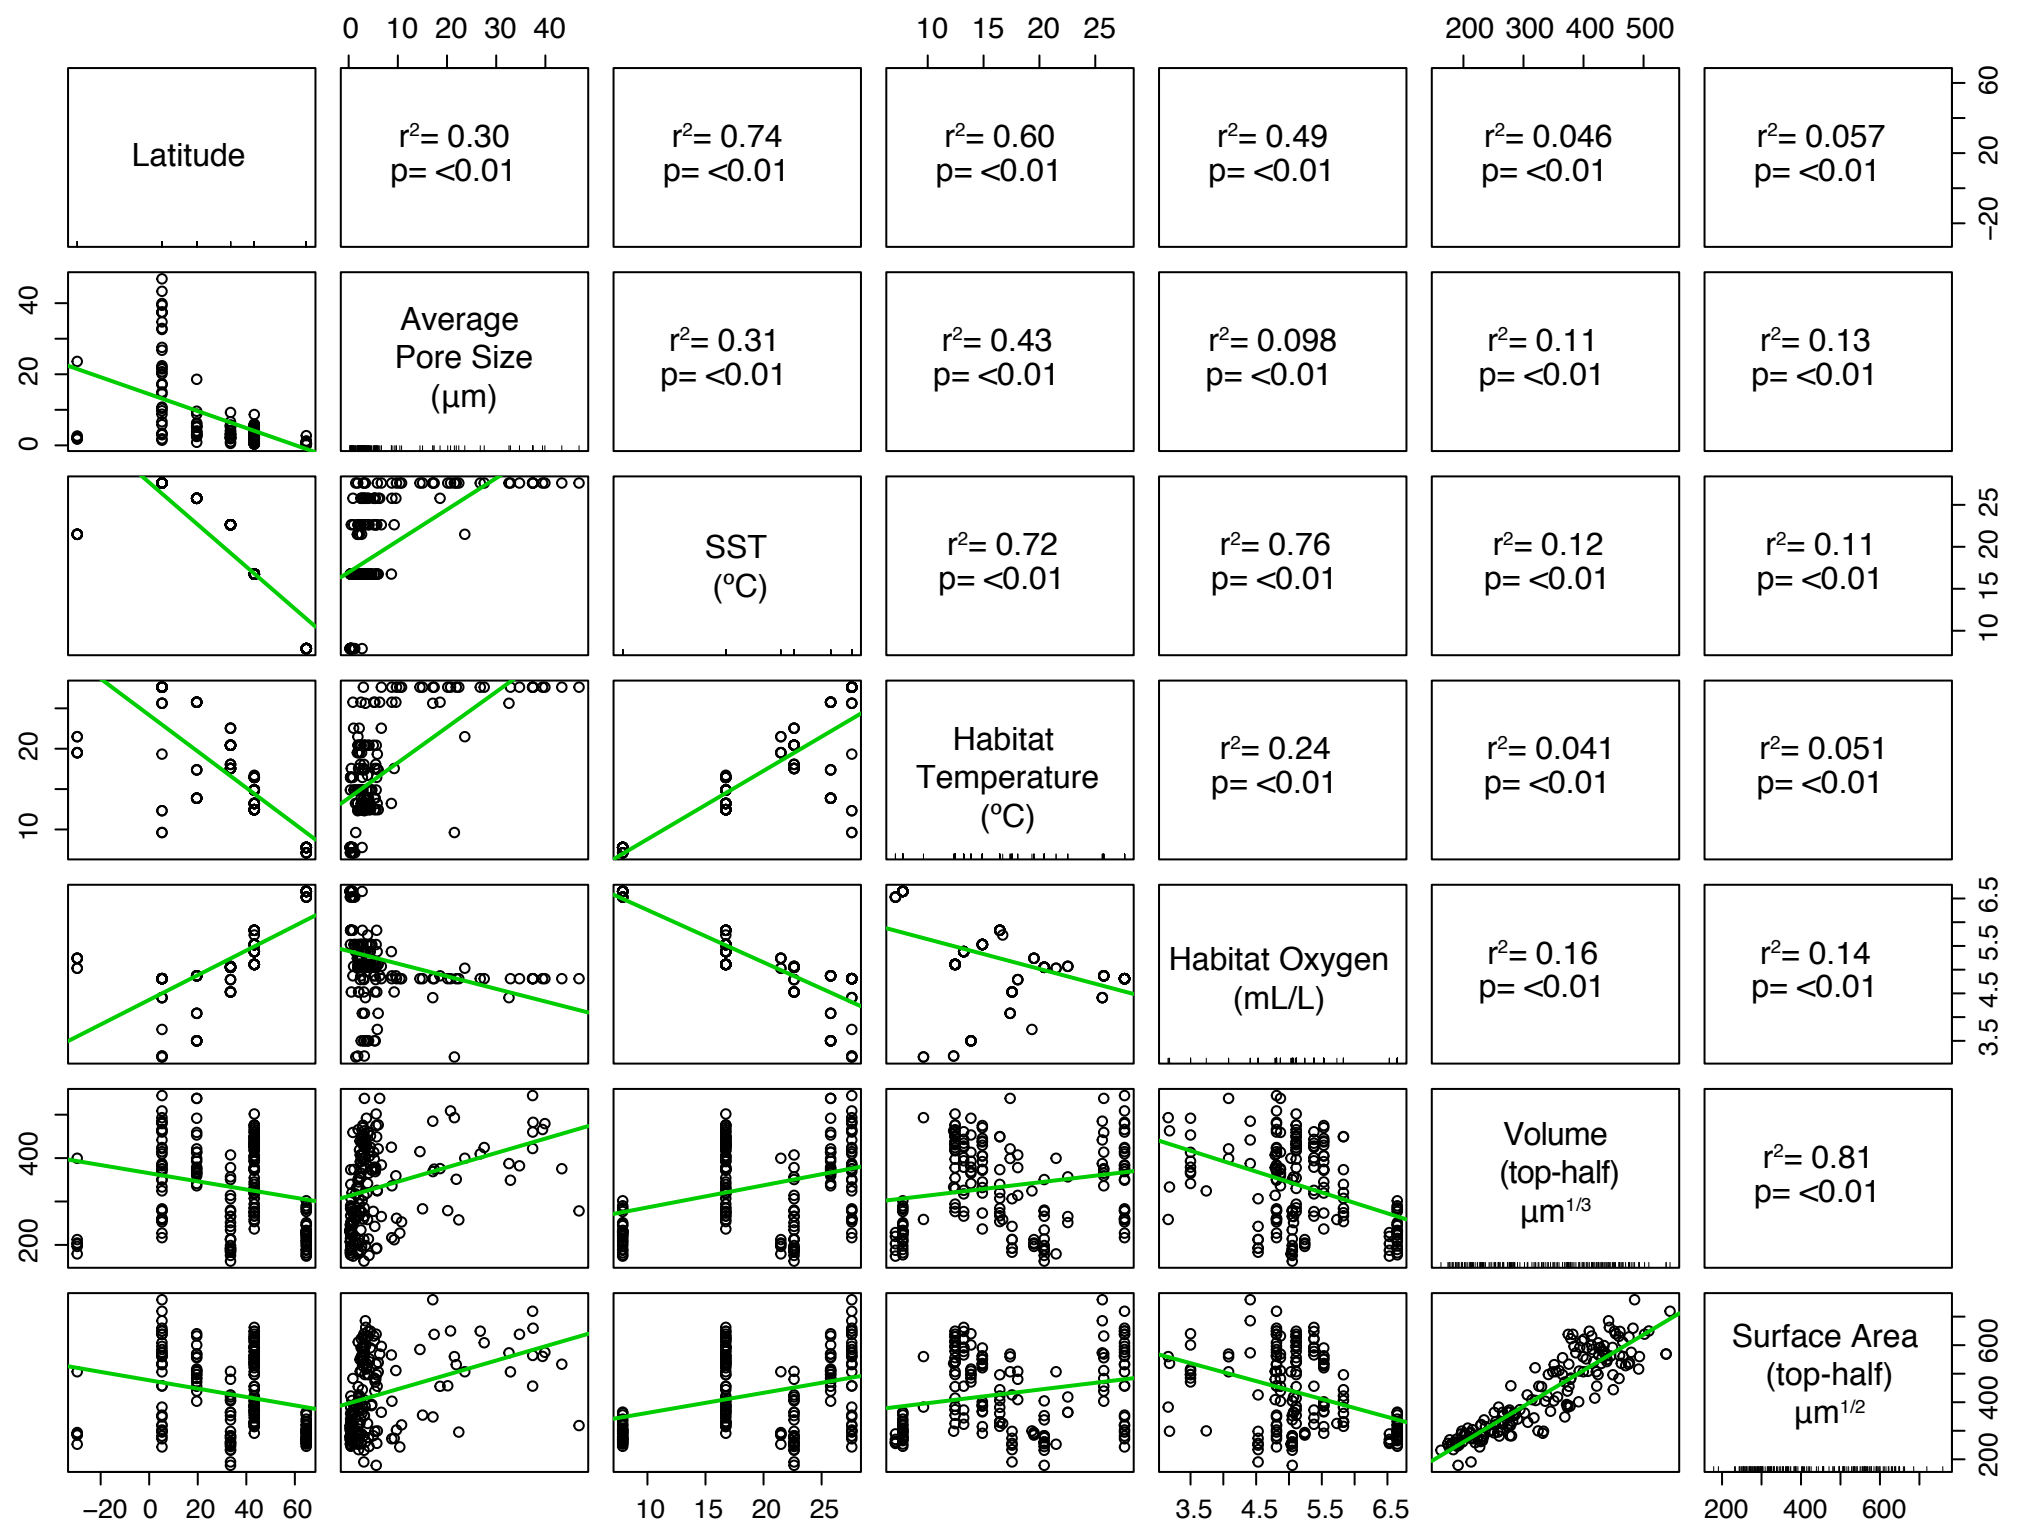

Supplement: Supplementary file 8 [file bg-2018-222-supplement.zip]

Supplemental Figure 1

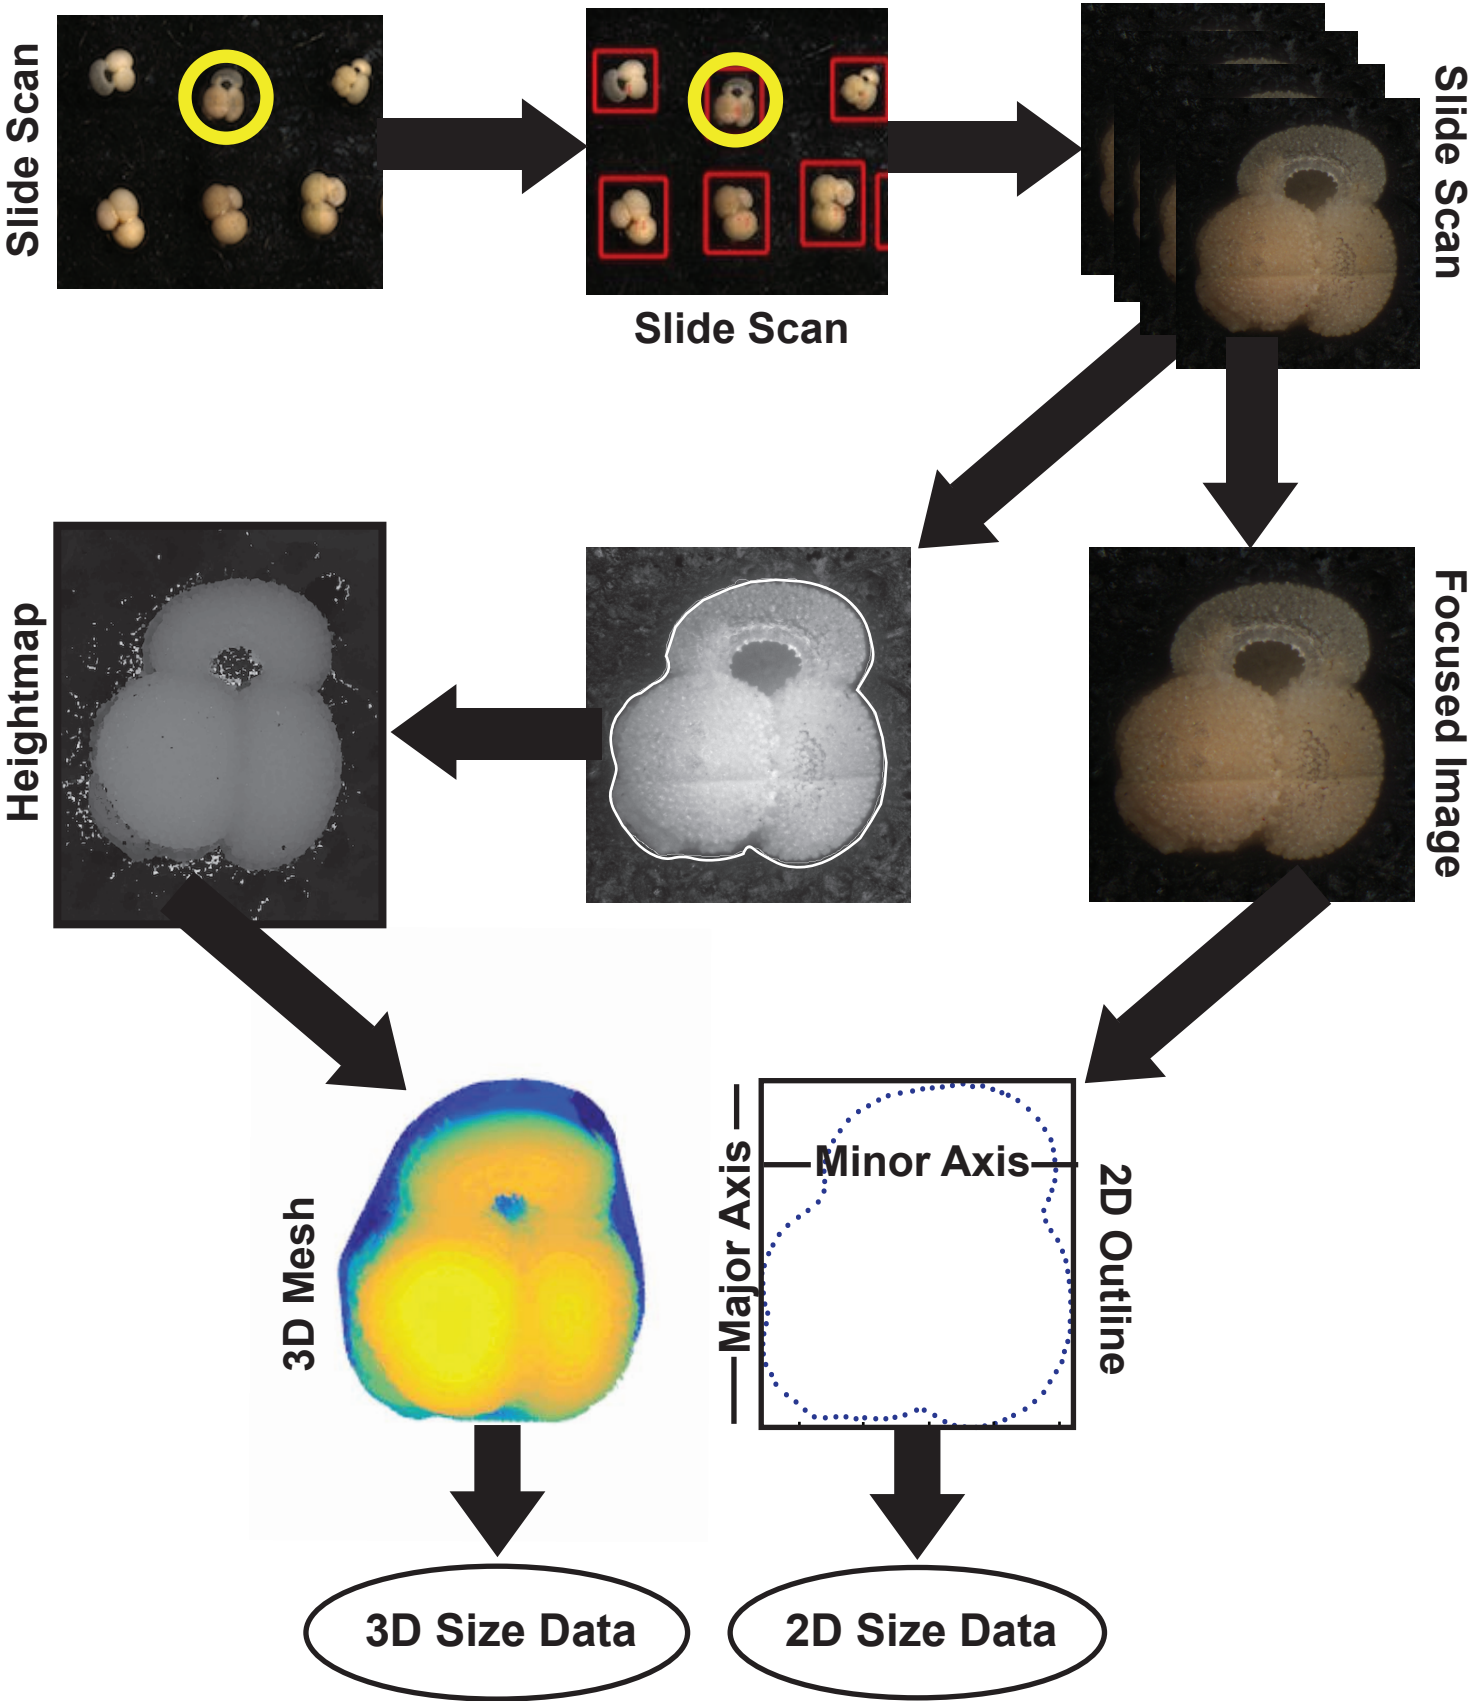

Supplement: Supplementary file 9 [file bg-2018-222-supplement.zip]

Supplementary Figure 4b.

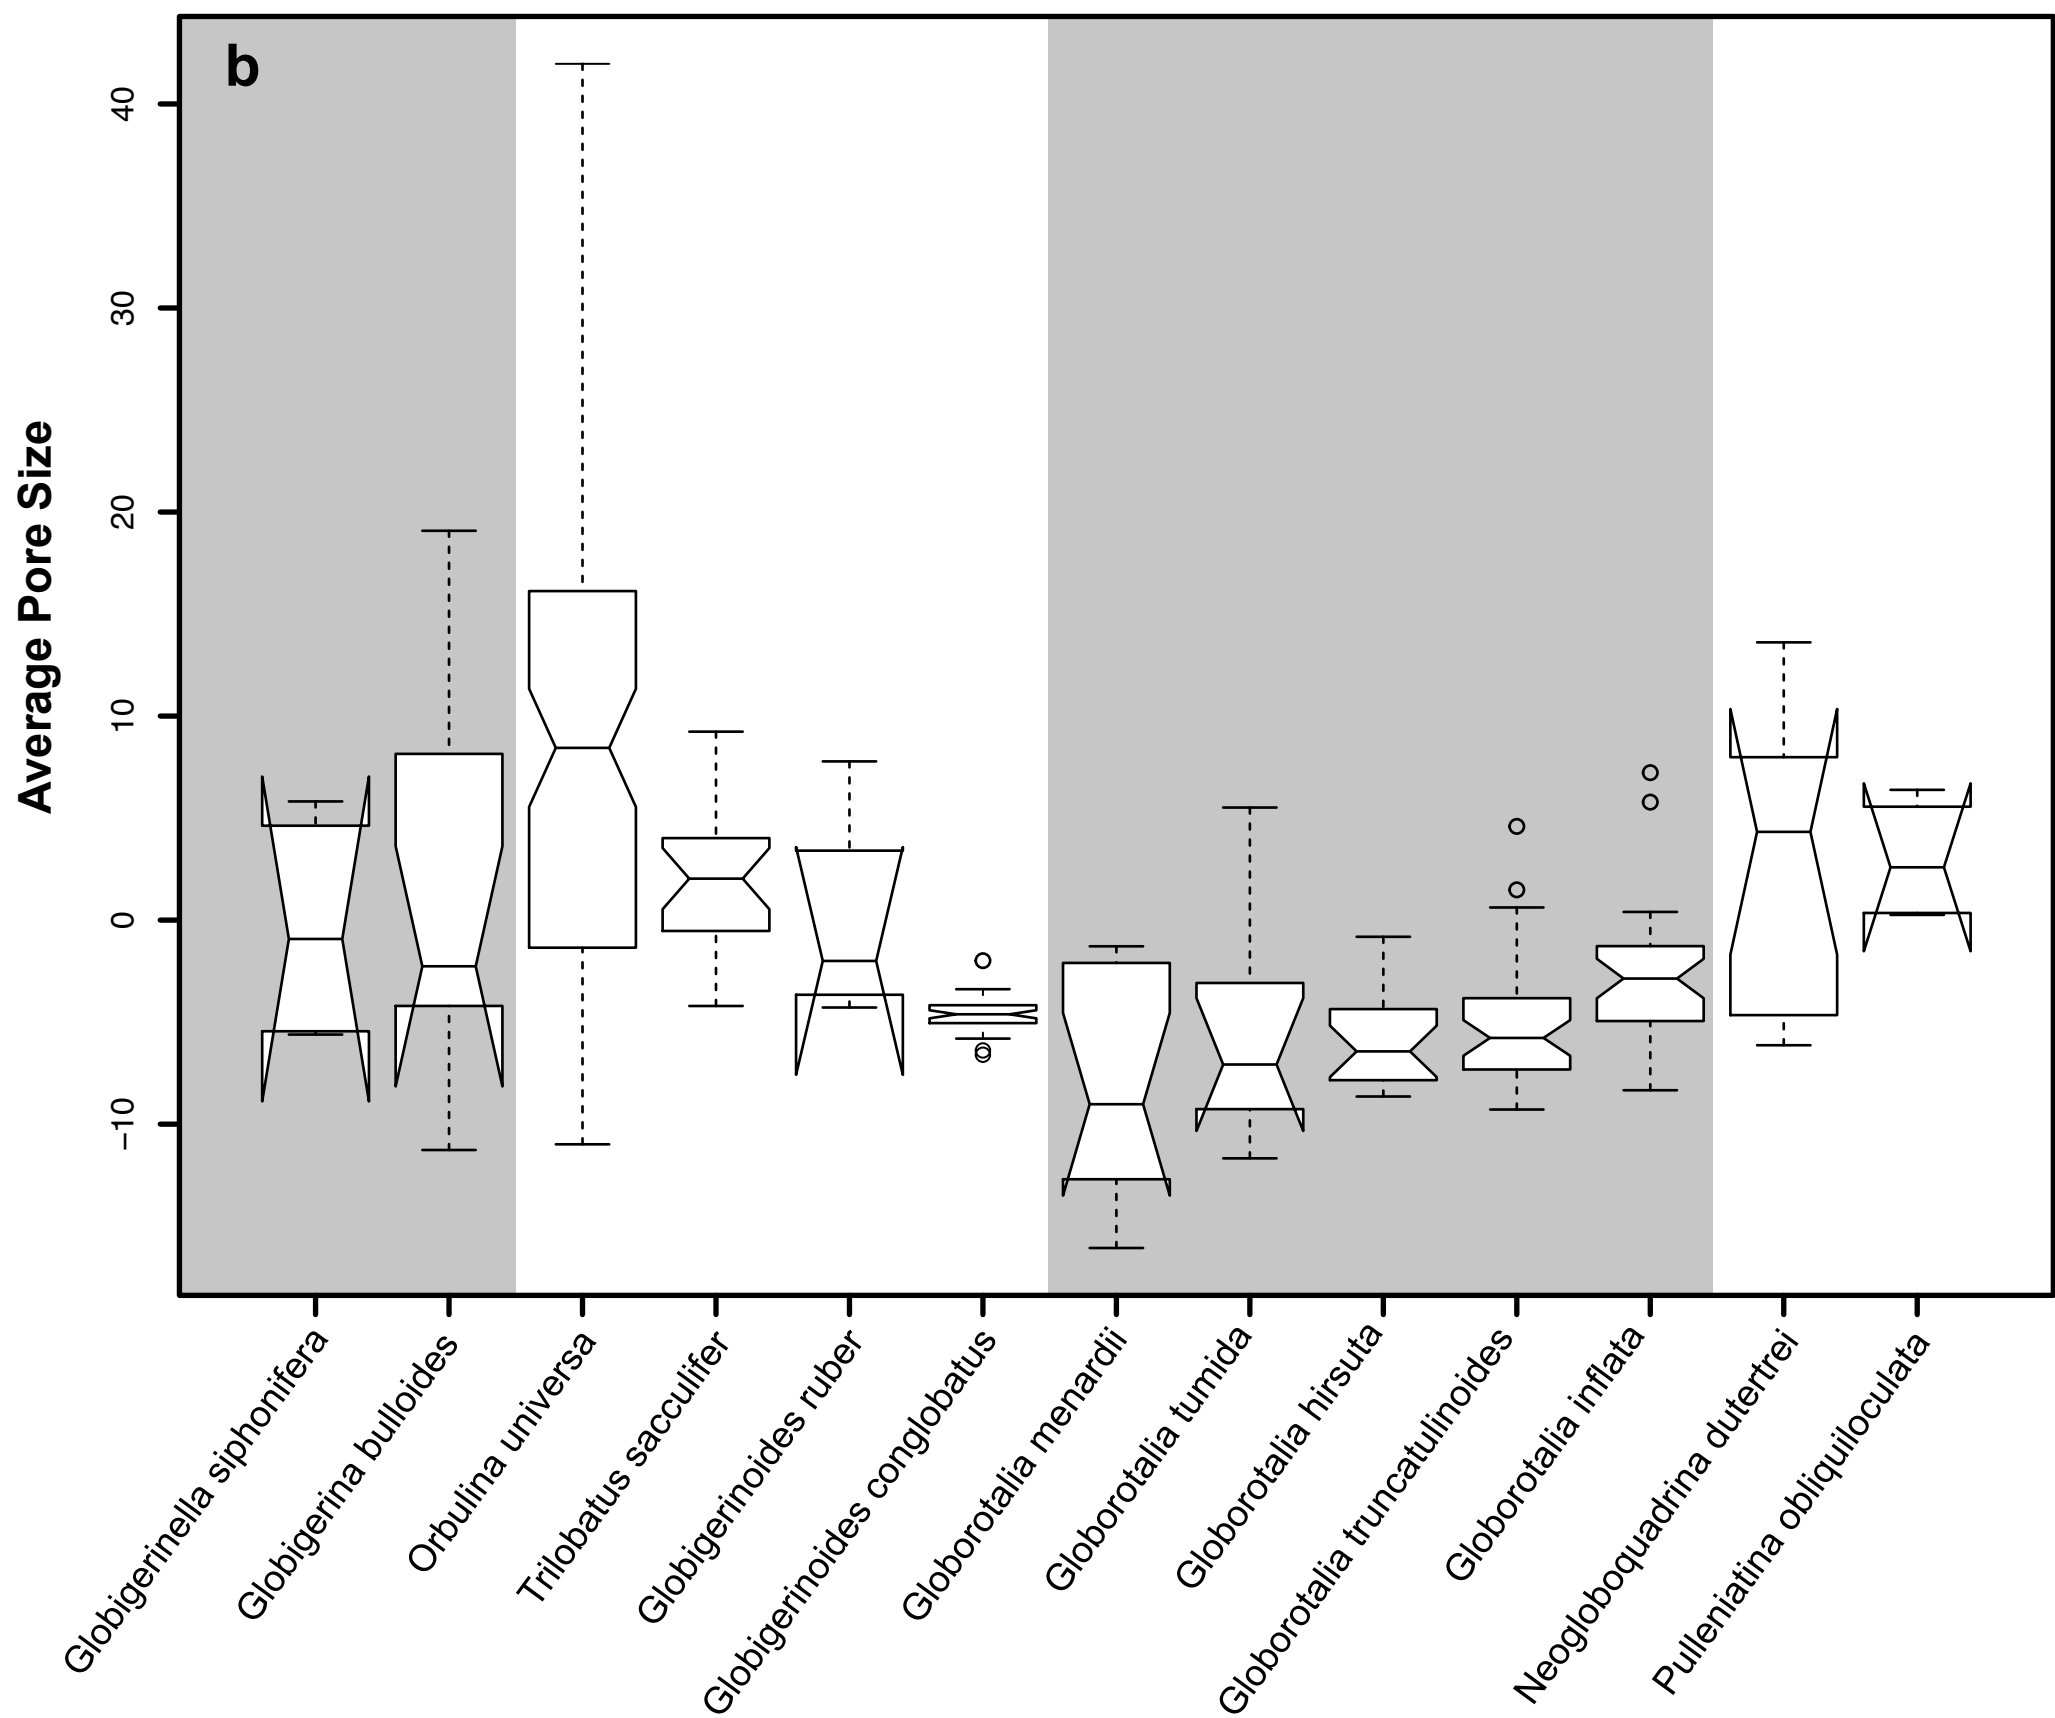

Supplement: Supplementary file 10 [file bg-2018-222-supplement.zip]
